# Supplementary material for: Synthesis of a zigzag carbon nanobelt
Source: Springer Nature journal article supplement (doi:10.1038/s41557-020-00627-5), 2021-01-25
Supplement: 41557_2020_627_MOESM1_ESM.cif [file 41557_2020_627_MOESM1_ESM.cif]

data_cheung
_audit_creation_date               2020-03-26
_audit_creation_method
;
Olex2 1.2
(compiled 2018.05.29 svn.r3510 for OlexSys, GUI svn.r5506)
;
_shelx_SHELXL_version_number       '2018/3'
_audit_contact_author_address      ?
_audit_contact_author_email        ?
_audit_contact_author_name         ''
_audit_contact_author_phone        ?
_publ_contact_author_id_orcid      ?
_publ_section_references
;
Dolomanov, O.V., Bourhis, L.J., Gildea, R.J, Howard, J.A.K. & Puschmann, H.
 (2009), J. Appl. Cryst. 42, 339-341.

Sheldrick, G.M. (2015). Acta Cryst. A71, 3-8.

Sheldrick, G.M. (2015). Acta Cryst. C71, 3-8.
;
_chemical_name_common              ?
_chemical_name_systematic
;
 ? 
;
_chemical_formula_moiety           'C156 H144, 9(C7 H8)'
_chemical_formula_sum              'C219 H216'
_chemical_formula_weight           2847.91
_chemical_melting_point            ?
_chemical_oxdiff_formula           'C156 H144'
loop_
  _atom_type_symbol
  _atom_type_description
  _atom_type_scat_dispersion_real
  _atom_type_scat_dispersion_imag
  _atom_type_scat_source
 'C' 'C' 0.0033 0.0016 'International Tables Vol C Tables 4.2.6.8 and 6.1.1.4'
 'H' 'H' 0.0000 0.0000 'International Tables Vol C Tables 4.2.6.8 and 6.1.1.4'

_shelx_space_group_comment
;
The symmetry employed for this shelxl refinement is uniquely defined
by the following loop, which should always be used as a source of
symmetry information in preference to the above space-group names.
They are only intended as comments.
;
_space_group_crystal_system        'orthorhombic'
_space_group_IT_number             58
_space_group_name_H-M_alt          'P n n m'
_space_group_name_Hall             '-P 2 2n'
loop_
  _space_group_symop_operation_xyz
 'x, y, z'
 '-x, -y, z'
 '-x+1/2, y+1/2, -z+1/2'
 'x+1/2, -y+1/2, -z+1/2'
 '-x, -y, -z'
 'x, y, -z'
 'x-1/2, -y-1/2, z-1/2'
 '-x-1/2, y-1/2, z-1/2'

_cell_length_a                     14.5786(7)
_cell_length_b                     21.945(2)
_cell_length_c                     28.1707(16)
_cell_angle_alpha                  90
_cell_angle_beta                   90
_cell_angle_gamma                  90
_cell_volume                       9012.6(11)
_cell_formula_units_Z              2
_cell_measurement_reflns_used      5471
_cell_measurement_temperature      123(2)
_cell_measurement_theta_max        23.7040
_cell_measurement_theta_min        1.5780
_shelx_estimated_absorpt_T_max     0.994
_shelx_estimated_absorpt_T_min     0.994
_exptl_absorpt_coefficient_mu      0.059
_exptl_absorpt_correction_T_max    1.00000
_exptl_absorpt_correction_T_min    0.64643
_exptl_absorpt_correction_type     multi-scan
_exptl_absorpt_process_details
;
CrysAlisPro 1.171.40.39a (Rigaku Oxford Diffraction, 2019)
Empirical absorption correction using spherical harmonics,
 implemented in SCALE3 ABSPACK scaling algorithm.
;
_exptl_absorpt_special_details     ?
_exptl_crystal_colour              colourless
_exptl_crystal_colour_primary      colourless
_exptl_crystal_density_diffrn      1.049
_exptl_crystal_density_meas        ?
_exptl_crystal_density_method      'not measured'
_exptl_crystal_description         block
_exptl_crystal_F_000               3060
_exptl_crystal_size_max            0.1
_exptl_crystal_size_mid            0.1
_exptl_crystal_size_min            0.1
_exptl_special_details
;
 ? 
;
_exptl_transmission_factor_max     ?
_exptl_transmission_factor_min     ?
_diffrn_reflns_av_R_equivalents    0.0987
_diffrn_reflns_av_unetI/netI       0.0985
_diffrn_reflns_Laue_measured_fraction_full  1.000
_diffrn_reflns_Laue_measured_fraction_max  1.000
_diffrn_reflns_limit_h_max         17
_diffrn_reflns_limit_h_min         -16
_diffrn_reflns_limit_k_max         14
_diffrn_reflns_limit_k_min         -26
_diffrn_reflns_limit_l_max         24
_diffrn_reflns_limit_l_min         -33
_diffrn_reflns_number              33780
_diffrn_reflns_point_group_measured_fraction_full  1.000
_diffrn_reflns_point_group_measured_fraction_max  1.000
_diffrn_reflns_theta_full          24.999
_diffrn_reflns_theta_max           24.999
_diffrn_reflns_theta_min           1.446
_diffrn_ambient_temperature        123(2)
_diffrn_detector                   'CCD plate'
_diffrn_detector_area_resol_mean   5.8140
_diffrn_detector_type              'Pilatus 200K'
_diffrn_measured_fraction_theta_full  1.000
_diffrn_measured_fraction_theta_max  1.000
_diffrn_measurement_details
;
List of Runs (angles in degrees, time in seconds):

  # Type    Start    End  Width  t~exp~   \w     \q     \k     \f   Frames
--------------------------------------------------------------------------
  1  \w    -14.00  39.00   0.50  315.45    --  -10.82 -99.00 150.00  106
  2  \w    -99.00  20.00   0.50  315.45    --  -10.82 -19.00-162.00  238
  3  \w     52.00  83.00   0.50  315.45    --   11.21-179.00-150.00   62
;
_diffrn_measurement_device         'four-circle diffractometer'
_diffrn_measurement_device_type    'ROD, Synergy Custom system, Pilatus 200K'
_diffrn_measurement_method         '\w scans'
_diffrn_orient_matrix_type        
 'CrysAlisPro convention (1999,Acta A55,543-557)'
_diffrn_orient_matrix_UB_11        0.0025517000
_diffrn_orient_matrix_UB_12        0.0140506000
_diffrn_orient_matrix_UB_13        -0.0226126000
_diffrn_orient_matrix_UB_21        -0.0120032000
_diffrn_orient_matrix_UB_22        -0.0279913000
_diffrn_orient_matrix_UB_23        -0.0109980000
_diffrn_orient_matrix_UB_31        -0.0470987000
_diffrn_orient_matrix_UB_32        0.0078587000
_diffrn_orient_matrix_UB_33        0.0015640000
_diffrn_oxdiff_digest_frames
;
016a9a9d65f894ceffa1c52febebb6b27300025cb73
;
_diffrn_oxdiff_digest_hkl
;
016ca5860b1323d3bd3ef3afe3283c0d88bfed
;
_diffrn_radiation_monochromator    mirror
_diffrn_radiation_probe            x-ray
_diffrn_radiation_type             MoK\a
_diffrn_radiation_wavelength       0.71073
_diffrn_source                     'Rotating-anode X-ray tube'
_diffrn_source_type                'Rigaku (Mo) X-ray Source'
_reflns_Friedel_coverage           0.000
_reflns_Friedel_fraction_full      .
_reflns_Friedel_fraction_max       .
_reflns_number_gt                  3965
_reflns_number_total               8118
_reflns_odcompleteness_completeness  99.85
_reflns_odcompleteness_iscentric   1
_reflns_odcompleteness_theta       25.01
_reflns_special_details
;
 Reflections were merged by SHELXL according to the crystal
 class for the calculation of statistics and refinement.
 
 _reflns_Friedel_fraction is defined as the number of unique
 Friedel pairs measured divided by the number that would be
 possible theoretically, ignoring centric projections and
 systematic absences.
;
_reflns_threshold_expression       'I > 2\s(I)'
_computing_cell_refinement         'CrysAlisPro 1.171.40.39a (Rigaku OD, 2019)'
_computing_data_collection         'CrysAlisPro 1.171.40.39a (Rigaku OD, 2019)'
_computing_data_reduction          'CrysAlisPro 1.171.40.39a (Rigaku OD, 2019)'
_computing_molecular_graphics      'Olex2 (Dolomanov et al., 2009)'
_computing_publication_material    'Olex2 (Dolomanov et al., 2009)'
_computing_structure_refinement    'ShelXL (Sheldrick, 2015)'
_computing_structure_solution      'ShelXT (Sheldrick, 2015)'
_refine_diff_density_max           0.750
_refine_diff_density_min           -0.546
_refine_diff_density_rms           0.107
_refine_ls_extinction_coef         .
_refine_ls_extinction_method       none
_refine_ls_goodness_of_fit_ref     1.261
_refine_ls_hydrogen_treatment      constr
_refine_ls_matrix_type             full
_refine_ls_number_parameters       679
_refine_ls_number_reflns           8118
_refine_ls_number_restraints       530
_refine_ls_R_factor_all            0.2190
_refine_ls_R_factor_gt             0.1277
_refine_ls_restrained_S_all        1.249
_refine_ls_shift/su_max            0.000
_refine_ls_shift/su_mean           0.000
_refine_ls_structure_factor_coef   Fsqd
_refine_ls_weighting_details      
 'w=1/[\s^2^(Fo^2^)+(0.2000P)^2^] where P=(Fo^2^+2Fc^2^)/3'
_refine_ls_weighting_scheme        calc
_refine_ls_wR_factor_gt            0.3372
_refine_ls_wR_factor_ref           0.3959
_refine_special_details            ?
_olex2_refinement_description
;
1. Fixed Uiso
 At 1.2 times of:
  All C(H) groups
 At 1.5 times of:
  All C(H,H,H) groups
2. Restrained distances
 C41-C42 = C42-C43 = C43-C44 = C44-C45 = C45-C46 = C46-C41
 1.39 with sigma of 0.01
 C67-C66 = C66-C65 = C65-C64 = C64-C63 = C63-C62 = C62-C67
 1.39 with sigma of 0.01
 C41-C43 = C43-C45 = C45-C41 = C42-C44 = C44-C46 = C46-C42
 2.41 with sigma of 0.02
 C67-C65 = C65-C63 = C63-C67 = C66-C64 = C64-C62 = C62-C66
 2.41 with sigma of 0.02
 C69-C70 = C70-C71 = C71-C72 = C72-C73 = C73-C74 = C74-C69
 1.39 with sigma of 0.01
 C69-C71 = C71-C73 = C73-C69 = C70-C72 = C72-C74 = C74-C70
 2.41 with sigma of 0.02
 C59-C60 = C60-C55 = C55-C56 = C56-C57 = C57-C58 = C58-C59
 1.39 with sigma of 0.01
 C59-C55 = C55-C57 = C57-C59 = C60-C56 = C56-C58 = C58-C56
 2.41 with sigma of 0.02
 C69-C75
 1.5 with sigma of 0.01
 C75-C70 = C75-C74
 2.5 with sigma of 0.02
 C48-C49 = C49-C50 = C50-C51 = C51-C52 = C52-C53 = C53-C48
 1.39 with sigma of 0.01
 C48-C50 = C50-C52 = C52-C48 = C49-C51 = C51-C53 = C53-C49
 2.41 with sigma of 0.02
 C41-C47 = C54-C48 = C55-C61 = C62-C68
 1.5 with sigma of 0.01
 C47-C42 = C47-C46 = C54-C49 = C54-C53 = C61-C60 = C61-C56 = C68-C67 = C68-C63
 2.5 with sigma of 0.02
3. Restrained planarity
 C41, C42, C43, C44, C45, C46, C47
 with sigma of 0.02
 C67, C66, C65, C64, C63, C62, C68
 with sigma of 0.02
 C69, C70, C71, C72, C73, C74, C75
 with sigma of 0.02
 C59, C60, C55, C56, C57, C58, C61
 with sigma of 0.02
 C48, C49, C50, C51, C52, C53, C54
 with sigma of 0.02
4. Uiso/Uaniso restraints and constraints
Uanis(C41) \\sim Ueq, Uanis(C42) \\sim Ueq, Uanis(C43) \\sim Ueq, Uanis(C44)
\\sim Ueq, Uanis(C45) \\sim Ueq, Uanis(C46) \\sim Ueq, Uanis(C47) \\sim Ueq:
with sigma of 0.03 and sigma for terminal atoms of 0.03
Uanis(C67) \\sim Ueq, Uanis(C66) \\sim Ueq, Uanis(C65) \\sim Ueq, Uanis(C64)
\\sim Ueq, Uanis(C63) \\sim Ueq, Uanis(C62) \\sim Ueq, Uanis(C68) \\sim Ueq:
with sigma of 0.03 and sigma for terminal atoms of 0.03
Uanis(C69) \\sim Ueq, Uanis(C70) \\sim Ueq, Uanis(C71) \\sim Ueq, Uanis(C72)
\\sim Ueq, Uanis(C73) \\sim Ueq, Uanis(C74) \\sim Ueq, Uanis(C75) \\sim Ueq:
with sigma of 0.03 and sigma for terminal atoms of 0.03
Uanis(C59) \\sim Ueq, Uanis(C60) \\sim Ueq, Uanis(C55) \\sim Ueq, Uanis(C56)
\\sim Ueq, Uanis(C57) \\sim Ueq, Uanis(C58) \\sim Ueq, Uanis(C61) \\sim Ueq:
with sigma of 0.03 and sigma for terminal atoms of 0.03
Uanis(C48) \\sim Ueq, Uanis(C49) \\sim Ueq, Uanis(C50) \\sim Ueq, Uanis(C51)
\\sim Ueq, Uanis(C52) \\sim Ueq, Uanis(C53) \\sim Ueq, Uanis(C54) \\sim Ueq:
with sigma of 0.03 and sigma for terminal atoms of 0.03
5. Rigid body (RIGU) restrains
 C41, C42, C43, C44, C45, C46, C47
 with sigma for 1-2 distances of 0.002 and sigma for 1-3 distances of 0.002
 C67, C66, C65, C64, C63, C62, C68
 with sigma for 1-2 distances of 0.002 and sigma for 1-3 distances of 0.002
 C69, C70, C71, C72, C73, C74, C75
 with sigma for 1-2 distances of 0.002 and sigma for 1-3 distances of 0.002
 C59, C60, C55, C56, C57, C58, C61
 with sigma for 1-2 distances of 0.005 and sigma for 1-3 distances of 0.005
 C48, C49, C50, C51, C52, C53, C54
 with sigma for 1-2 distances of 0.002 and sigma for 1-3 distances of 0.002
6. Others
 Fixed Sof: C47(0.25) H47A(0.25) H47B(0.25) H47C(0.25) C41(0.25) C42(0.25)
 H42(0.25) C43(0.25) H43(0.25) C44(0.25) H44(0.25) C45(0.25) H45(0.25)
 C46(0.25) H46(0.25) C67(0.5) H67(0.5) C66(0.5) H66(0.5) C65(0.5) H65(0.5)
 C64(0.5) H64(0.5) C63(0.5) H63(0.5) C62(0.5) C59(0.5) H59(0.5) C60(0.5)
 H60(0.5) C55(0.5) C56(0.5) H56(0.5) C57(0.5) H57(0.5) C58(0.5) H58(0.5)
 C54(0.5) H54A(0.5) H54B(0.5) H54C(0.5) C48(0.5) C53(0.5) H53(0.5) C52(0.5)
 H52(0.5) C51(0.5) H51(0.5) C50(0.5) H50(0.5) C49(0.5) H49(0.5) C61(0.5)
 H61A(0.5) H61B(0.5) H61C(0.5) C68(0.5) H68A(0.5) H68B(0.5) H68C(0.5) C75(0.5)
 H75A(0.5) H75B(0.5) H75C(0.5) C69(0.5) C74(0.5) H74(0.5) C73(0.5) H73(0.5)
 C72(0.5) H72(0.5) C71(0.5) H71(0.5) C70(0.5) H70(0.5)
7.a Me refined with riding coordinates:
 C47(H47A,H47B,H47C), C54(H54A,H54B,H54C), C61(H61A,H61B,H61C), C68(H68A,H68B,
 H68C), C75(H75A,H75B,H75C)
7.b Aromatic/amide H refined with riding coordinates:
 C4(H4), C1(H1), C36(H36), C15(H15), C13(H13), C30(H30), C27(H27), C34(H34),
 C8(H8), C6(H6), C42(H42), C43(H43), C44(H44), C45(H45), C46(H46), C67(H67),
 C66(H66), C65(H65), C64(H64), C63(H63), C59(H59), C60(H60), C56(H56), C57(H57),
  C58(H58), C53(H53), C52(H52), C51(H51), C50(H50), C49(H49), C74(H74),
 C73(H73), C72(H72), C71(H71), C70(H70)
7.c Idealised Me refined as rotating group:
 C38(H38A,H38B,H38C), C39(H39A,H39B,H39C), C40(H40A,H40B,H40C), C20(H20A,H20B,
 H20C), C21(H21A,H21B,H21C), C24(H24A,H24B,H24C), C26(H26A,H26B,H26C), C22(H22A,
 H22B,H22C), C25(H25A,H25B,H25C)
;
_atom_sites_solution_hydrogens     geom
_atom_sites_solution_primary       dual
_atom_sites_solution_secondary     ?
loop_
  _atom_site_label
  _atom_site_type_symbol
  _atom_site_fract_x
  _atom_site_fract_y
  _atom_site_fract_z
  _atom_site_U_iso_or_equiv
  _atom_site_adp_type
  _atom_site_occupancy
  _atom_site_site_symmetry_order
  _atom_site_calc_flag
  _atom_site_refinement_flags_posn
  _atom_site_refinement_flags_adp
  _atom_site_refinement_flags_occupancy
  _atom_site_disorder_assembly
  _atom_site_disorder_group
 C3 C 0.3872(3) 0.8076(2) 0.45679(14) 0.0434(11) Uani 1 1 d . . . . .
 C16 C 0.4422(3) 0.8039(2) 0.41292(14) 0.0432(11) Uani 1 1 d . . . . .
 C2 C 0.2955(3) 0.7880(2) 0.45638(14) 0.0462(12) Uani 1 1 d . . . . .
 C17 C 0.4086(3) 0.7674(2) 0.37632(14) 0.0425(12) Uani 1 1 d . . . . .
 C18 C 0.3139(3) 0.7464(2) 0.37579(14) 0.0444(12) Uani 1 1 d . . . . .
 C9 C 0.2800(3) 0.7110(2) 0.33839(15) 0.0482(12) Uani 1 1 d . . . . .
 C31 C 0.3773(3) 0.5285(2) 0.24840(14) 0.0465(12) Uani 1 1 d . . . . .
 C4 C 0.4294(4) 0.8186(3) 0.500000 0.0456(16) Uani 1 2 d S T P . .
 H4 H 0.490044 0.834507 0.500000 0.055 Uiso 1 2 calc RS T P . .
 C14 C 0.5854(3) 0.8187(2) 0.37076(16) 0.0492(12) Uani 1 1 d . . . . .
 C1 C 0.2503(4) 0.7806(3) 0.500000 0.0500(18) Uani 1 2 d S T P . .
 H1 H 0.187004 0.770266 0.500001 0.060 Uiso 1 2 calc RS T P . .
 C12 C 0.4673(3) 0.7519(2) 0.33823(15) 0.0461(12) Uani 1 1 d . . . . .
 C36 C 0.2900(3) 0.5038(3) 0.24004(14) 0.0496(12) Uani 1 1 d . . . . .
 H36 H 0.238895 0.530624 0.239172 0.059 Uiso 1 1 calc R . . . .
 C28 C 0.4856(3) 0.6146(2) 0.26057(15) 0.0473(12) Uani 1 1 d . . . . .
 C15 C 0.5281(3) 0.8300(2) 0.40921(15) 0.0474(12) Uani 1 1 d . . . . .
 H15 H 0.548631 0.856529 0.433662 0.057 Uiso 1 1 calc R . . . .
 C33 C 0.4388(3) 0.4254(2) 0.24628(14) 0.0452(12) Uani 1 1 d . . . . .
 C11 C 0.4389(3) 0.7038(2) 0.30601(14) 0.0465(12) Uani 1 1 d . . . . .
 C5 C 0.2541(3) 0.7646(2) 0.41307(15) 0.0473(12) Uani 1 1 d . . . . .
 C10 C 0.3468(3) 0.6816(2) 0.30664(15) 0.0485(12) Uani 1 1 d . . . . .
 C32 C 0.4541(3) 0.4882(2) 0.24785(15) 0.0463(12) Uani 1 1 d . . . . .
 C13 C 0.5536(3) 0.7801(2) 0.33627(16) 0.0514(13) Uani 1 1 d . . . . .
 H13 H 0.591835 0.772075 0.309685 0.062 Uiso 1 1 calc R . . . .
 C30 C 0.3274(3) 0.6270(2) 0.28337(15) 0.0500(13) Uani 1 1 d . . . . .
 H30 H 0.265642 0.613307 0.282365 0.060 Uiso 1 1 calc R . . . .
 C35 C 0.2745(3) 0.4419(3) 0.23296(15) 0.0519(13) Uani 1 1 d . . . . .
 C27 C 0.5046(3) 0.6700(2) 0.28128(15) 0.0493(12) Uani 1 1 d . . . . .
 H27 H 0.564951 0.685934 0.278645 0.059 Uiso 1 1 calc R . . . .
 C29 C 0.3941(3) 0.5918(2) 0.26169(14) 0.0474(12) Uani 1 1 d . . . . .
 C34 C 0.3499(3) 0.4038(3) 0.23713(15) 0.0526(13) Uani 1 1 d . . . . .
 H34 H 0.340999 0.361144 0.233629 0.063 Uiso 1 1 calc R . . . .
 C8 C 0.1861(3) 0.7003(3) 0.33465(16) 0.0571(14) Uani 1 1 d . . . . .
 H8 H 0.163608 0.677515 0.308444 0.068 Uiso 1 1 calc R . . . .
 C6 C 0.1608(3) 0.7525(3) 0.40779(16) 0.0582(15) Uani 1 1 d . . . . .
 H6 H 0.120107 0.765488 0.432122 0.070 Uiso 1 1 calc R . . . .
 C23 C 0.6808(3) 0.8482(3) 0.36843(17) 0.0602(14) Uani 1 1 d . . . . .
 C7 C 0.1240(3) 0.7222(3) 0.36857(16) 0.0591(15) Uani 1 1 d . . . . .
 C37 C 0.1805(3) 0.4164(3) 0.2206(2) 0.0677(16) Uani 1 1 d . . . . .
 C19 C 0.0216(3) 0.7127(4) 0.36299(18) 0.081(2) Uani 1 1 d . . . . .
 C38 C 0.1678(4) 0.3532(3) 0.2392(2) 0.0811(18) Uani 1 1 d . . . . .
 H38A H 0.205146 0.324836 0.220504 0.122 Uiso 1 1 calc GR . . . .
 H38B H 0.103000 0.341707 0.236633 0.122 Uiso 1 1 calc GR . . . .
 H38C H 0.186831 0.351612 0.272488 0.122 Uiso 1 1 calc GR . . . .
 C39 C 0.1744(4) 0.4146(3) 0.1650(2) 0.096(2) Uani 1 1 d . . . . .
 H39A H 0.183239 0.455781 0.152365 0.144 Uiso 1 1 calc GR . . . .
 H39B H 0.113971 0.399349 0.155475 0.144 Uiso 1 1 calc GR . . . .
 H39C H 0.222158 0.387593 0.152528 0.144 Uiso 1 1 calc GR . . . .
 C40 C 0.1045(4) 0.4567(3) 0.2407(3) 0.106(3) Uani 1 1 d . . . . .
 H40A H 0.111489 0.459826 0.275236 0.160 Uiso 1 1 calc GR . . . .
 H40B H 0.044676 0.438860 0.233225 0.160 Uiso 1 1 calc GR . . . .
 H40C H 0.108747 0.497460 0.226597 0.160 Uiso 1 1 calc GR . . . .
 C20 C -0.0327(4) 0.7261(4) 0.4050(2) 0.105(3) Uani 1 1 d . . . . .
 H20A H -0.008776 0.702947 0.432043 0.158 Uiso 1 1 calc GR . . . .
 H20B H -0.096751 0.714589 0.399299 0.158 Uiso 1 1 calc GR . . . .
 H20C H -0.029335 0.769791 0.411979 0.158 Uiso 1 1 calc GR . . . .
 C21 C -0.0103(4) 0.7416(5) 0.3191(2) 0.144(4) Uani 1 1 d . . . . .
 H21A H -0.005673 0.785991 0.322253 0.216 Uiso 1 1 calc GR . . . .
 H21B H -0.074336 0.730257 0.313335 0.216 Uiso 1 1 calc GR . . . .
 H21C H 0.027738 0.727959 0.292512 0.216 Uiso 1 1 calc GR . . . .
 C24 C 0.7342(4) 0.8322(5) 0.4129(2) 0.131(4) Uani 1 1 d . . . . .
 H24A H 0.699191 0.844836 0.440944 0.197 Uiso 1 1 calc GR . . . .
 H24B H 0.793363 0.853401 0.412527 0.197 Uiso 1 1 calc GR . . . .
 H24C H 0.744529 0.788119 0.414026 0.197 Uiso 1 1 calc GR . . . .
 C26 C 0.7379(4) 0.8259(4) 0.3264(3) 0.123(3) Uani 1 1 d . . . . .
 H26A H 0.744411 0.781477 0.328144 0.185 Uiso 1 1 calc GR . . . .
 H26B H 0.798684 0.844859 0.327482 0.185 Uiso 1 1 calc GR . . . .
 H26C H 0.707176 0.836958 0.296713 0.185 Uiso 1 1 calc GR . . . .
 C22 C 0.0033(5) 0.6414(5) 0.3545(3) 0.123(3) Uani 1 1 d . . . . .
 H22A H 0.040881 0.627148 0.327868 0.184 Uiso 1 1 calc GR . . . .
 H22B H -0.061672 0.634964 0.347193 0.184 Uiso 1 1 calc GR . . . .
 H22C H 0.019605 0.618673 0.383207 0.184 Uiso 1 1 calc GR . . . .
 C25 C 0.6718(5) 0.9152(4) 0.3652(4) 0.143(3) Uani 1 1 d . . . . .
 H25A H 0.632627 0.925626 0.338090 0.215 Uiso 1 1 calc GR . . . .
 H25B H 0.732596 0.933366 0.360770 0.215 Uiso 1 1 calc GR . . . .
 H25C H 0.644251 0.930858 0.394432 0.215 Uiso 1 1 calc GR . . . .
 C47 C 0.6811(15) 1.0433(11) 0.4712(8) 0.113(8) Uani 0.25 1 d D U . A -2
 H47A H 0.678031 1.041210 0.436475 0.169 Uiso 0.25 1 calc R . . A -2
 H47B H 0.693993 1.085242 0.480999 0.169 Uiso 0.25 1 calc R . . A -2
 H47C H 0.729951 1.016373 0.482637 0.169 Uiso 0.25 1 calc R . . A -2
 C41 C 0.5911(14) 1.0233(9) 0.4918(7) 0.082(6) Uani 0.25 1 d D U . A -2
 C42 C 0.577(2) 1.0220(15) 0.5405(7) 0.086(6) Uani 0.25 1 d D U . A -2
 H42 H 0.624778 1.033878 0.561336 0.103 Uiso 0.25 1 calc R . . A -2
 C43 C 0.493(2) 1.003(2) 0.5589(8) 0.119(10) Uani 0.25 1 d D U . A -2
 H43 H 0.483421 1.002456 0.592216 0.143 Uiso 0.25 1 calc R . . A -2
 C44 C 0.424(2) 0.9860(18) 0.5279(11) 0.128(14) Uani 0.25 1 d D U . A -2
 H44 H 0.366268 0.973153 0.540143 0.154 Uiso 0.25 1 calc R . . A -2
 C45 C 0.4377(17) 0.9873(15) 0.4792(10) 0.115(12) Uani 0.25 1 d D U . A -2
 H45 H 0.389929 0.975002 0.458342 0.138 Uiso 0.25 1 calc R . . A -2
 C46 C 0.5211(16) 1.0063(15) 0.4608(8) 0.091(8) Uani 0.25 1 d D U . A -2
 H46 H 0.530493 1.007763 0.427424 0.109 Uiso 0.25 1 calc R . . A -2
 C67 C 0.241(2) 0.4237(14) 0.3744(8) 0.389(18) Uani 0.5 1 d D U . B -2
 H67 H 0.178906 0.409806 0.375149 0.467 Uiso 0.5 1 calc R . . B -2
 C66 C 0.311(3) 0.3816(13) 0.3726(7) 0.264(11) Uani 0.5 1 d D U . B -2
 H66 H 0.298590 0.339128 0.372076 0.317 Uiso 0.5 1 calc R . . B -2
 C65 C 0.401(2) 0.4026(18) 0.3717(8) 0.381(18) Uani 0.5 1 d D U . B -2
 H65 H 0.450398 0.374164 0.370502 0.457 Uiso 0.5 1 calc R . . B -2
 C64 C 0.4202(19) 0.4646(19) 0.3724(11) 0.380(17) Uani 0.5 1 d D U . B -2
 H64 H 0.481904 0.478544 0.371690 0.455 Uiso 0.5 1 calc R . . B -2
 C63 C 0.348(2) 0.5063(15) 0.3741(10) 0.402(18) Uani 0.5 1 d D U . B -2
 H63 H 0.360712 0.548747 0.374587 0.482 Uiso 0.5 1 calc R . . B -2
 C62 C 0.258(2) 0.4858(13) 0.3750(8) 0.391(17) Uani 0.5 1 d D U . B -2
 C59 C 0.197(2) 0.4154(15) 0.5646(13) 0.38(2) Uani 0.5 1 d D U . C -3
 H59 H 0.144096 0.437439 0.554956 0.451 Uiso 0.5 1 calc R . . C -3
 C60 C 0.2350(19) 0.3723(14) 0.5341(10) 0.355(19) Uani 0.5 1 d D U . C -3
 H60 H 0.208675 0.365062 0.503739 0.426 Uiso 0.5 1 calc R . . C -3
 C55 C 0.3122(16) 0.3399(11) 0.5486(9) 0.345(19) Uani 0.5 1 d D U . C -3
 C56 C 0.3506(18) 0.3507(14) 0.5928(10) 0.304(16) Uani 0.5 1 d D U . C -3
 H56 H 0.403773 0.328830 0.602292 0.365 Uiso 0.5 1 calc R . . C -3
 C57 C 0.312(2) 0.3933(17) 0.6233(10) 0.306(17) Uani 0.5 1 d D U . C -3
 H57 H 0.337362 0.399509 0.653987 0.368 Uiso 0.5 1 calc R . . C -3
 C58 C 0.236(2) 0.4267(16) 0.6090(13) 0.40(2) Uani 0.5 1 d D U . C -3
 H58 H 0.210152 0.456935 0.629309 0.483 Uiso 0.5 1 calc R . . C -3
 C54 C 0.917(2) 0.9154(14) 0.4917(8) 0.383(17) Uani 0.5 1 d D U . D -1
 H54A H 0.854798 0.931628 0.494090 0.574 Uiso 0.5 1 calc R . . D -1
 H54B H 0.948943 0.934683 0.464972 0.574 Uiso 0.5 1 calc R . . D -1
 H54C H 0.914603 0.871234 0.486614 0.574 Uiso 0.5 1 calc R . . D -1
 C48 C 0.9684(14) 0.9285(9) 0.5369(7) 0.276(13) Uani 0.5 1 d D U . D -1
 C53 C 0.9270(13) 0.9599(11) 0.5740(8) 0.257(12) Uani 0.5 1 d D U . D -1
 H53 H 0.865805 0.974404 0.571285 0.308 Uiso 0.5 1 calc R . . D -1
 C52 C 0.9775(17) 0.9695(11) 0.6154(7) 0.272(14) Uani 0.5 1 d D U . D -1
 H52 H 0.949663 0.988902 0.641901 0.326 Uiso 0.5 1 calc R . . D -1
 C51 C 1.0687(17) 0.9507(12) 0.6180(8) 0.274(13) Uani 0.5 1 d D U . D -1
 H51 H 1.103489 0.959347 0.645726 0.329 Uiso 0.5 1 calc R . . D -1
 C50 C 1.1090(14) 0.9198(12) 0.5811(9) 0.273(13) Uani 0.5 1 d D U . D -1
 H50 H 1.170634 0.906042 0.583572 0.328 Uiso 0.5 1 calc R . . D -1
 C49 C 1.0588(15) 0.9088(10) 0.5401(8) 0.285(13) Uani 0.5 1 d D U . D -1
 H49 H 1.086158 0.887718 0.514225 0.342 Uiso 0.5 1 calc R . . D -1
 C61 C 0.355(2) 0.2933(14) 0.5163(13) 0.35(2) Uani 0.5 1 d D U . C -3
 H61A H 0.319569 0.291223 0.486662 0.520 Uiso 0.5 1 calc R . . C -3
 H61B H 0.418114 0.305080 0.509243 0.520 Uiso 0.5 1 calc R . . C -3
 H61C H 0.354128 0.253394 0.531816 0.520 Uiso 0.5 1 calc R . . C -3
 C68 C 0.179(2) 0.5294(16) 0.3774(12) 0.358(18) Uani 0.5 1 d D U . B -2
 H68A H 0.202739 0.571307 0.377577 0.538 Uiso 0.5 1 calc R . . B -2
 H68B H 0.139688 0.523535 0.349692 0.538 Uiso 0.5 1 calc R . . B -2
 H68C H 0.144151 0.522009 0.406441 0.538 Uiso 0.5 1 calc R . . B -2
 C75 C 0.572(3) 0.370(2) 0.5347(18) 0.48(3) Uani 0.5 1 d D U . E -1
 H75A H 0.586789 0.354713 0.566523 0.716 Uiso 0.5 1 calc R . . E -1
 H75B H 0.534229 0.406726 0.537444 0.716 Uiso 0.5 1 calc R . . E -1
 H75C H 0.537231 0.338506 0.517431 0.716 Uiso 0.5 1 calc R . . E -1
 C69 C 0.658(2) 0.3842(14) 0.5084(15) 0.58(3) Uani 0.5 1 d D U . E -1
 C74 C 0.743(3) 0.375(2) 0.5302(16) 0.54(3) Uani 0.5 1 d D U . E -1
 H74 H 0.745602 0.360276 0.561767 0.651 Uiso 0.5 1 calc R . . E -1
 C73 C 0.825(2) 0.388(2) 0.506(2) 0.51(2) Uani 0.5 1 d D U . E -1
 H73 H 0.882738 0.381629 0.521581 0.617 Uiso 0.5 1 calc R . . E -1
 C72 C 0.822(3) 0.4106(19) 0.460(2) 0.56(3) Uani 0.5 1 d D U . E -1
 H72 H 0.876580 0.419936 0.443714 0.676 Uiso 0.5 1 calc R . . E -1
 C71 C 0.737(4) 0.419(2) 0.4385(19) 0.59(3) Uani 0.5 1 d D U . E -1
 H71 H 0.734568 0.434597 0.406946 0.713 Uiso 0.5 1 calc R . . E -1
 C70 C 0.655(3) 0.4065(18) 0.4621(17) 0.60(3) Uani 0.5 1 d D U . E -1
 H70 H 0.597340 0.412826 0.446804 0.716 Uiso 0.5 1 calc R . . E -1

loop_
  _atom_site_aniso_label
  _atom_site_aniso_U_11
  _atom_site_aniso_U_22
  _atom_site_aniso_U_33
  _atom_site_aniso_U_23
  _atom_site_aniso_U_13
  _atom_site_aniso_U_12
 C3 0.046(3) 0.045(3) 0.039(2) 0.002(2) 0.0012(19) 0.005(2)
 C16 0.049(3) 0.042(3) 0.039(2) 0.008(2) -0.0038(19) 0.006(2)
 C2 0.046(3) 0.055(3) 0.037(2) 0.001(2) 0.000(2) 0.013(2)
 C17 0.045(3) 0.046(3) 0.036(2) 0.006(2) -0.0010(19) 0.011(2)
 C18 0.048(3) 0.049(3) 0.037(2) 0.003(2) -0.0033(19) 0.006(2)
 C9 0.048(3) 0.057(3) 0.040(2) 0.001(2) -0.001(2) 0.005(2)
 C31 0.052(3) 0.052(3) 0.036(2) -0.001(2) -0.002(2) 0.003(2)
 C4 0.046(4) 0.051(5) 0.040(4) 0.000 0.000 0.000(3)
 C14 0.054(3) 0.046(3) 0.048(3) -0.004(2) 0.002(2) 0.000(2)
 C1 0.044(4) 0.061(5) 0.044(4) 0.000 0.000 0.012(3)
 C12 0.050(3) 0.045(3) 0.043(3) 0.005(2) 0.000(2) 0.003(2)
 C36 0.042(3) 0.061(4) 0.046(3) -0.011(2) -0.009(2) 0.007(2)
 C28 0.051(3) 0.055(3) 0.036(2) 0.000(2) 0.0051(19) 0.003(2)
 C15 0.054(3) 0.049(3) 0.039(2) 0.004(2) 0.000(2) 0.001(2)
 C33 0.049(3) 0.051(3) 0.036(2) -0.004(2) -0.0016(19) 0.002(2)
 C11 0.053(3) 0.049(3) 0.037(2) 0.000(2) 0.000(2) 0.003(2)
 C5 0.041(3) 0.059(3) 0.042(3) 0.001(2) -0.005(2) 0.011(2)
 C10 0.049(3) 0.059(4) 0.037(2) -0.002(2) -0.006(2) 0.006(2)
 C32 0.046(3) 0.052(3) 0.041(2) 0.002(2) -0.0026(18) 0.002(2)
 C13 0.049(3) 0.057(3) 0.048(3) 0.002(3) 0.007(2) 0.003(2)
 C30 0.044(3) 0.065(4) 0.041(3) -0.003(2) -0.011(2) 0.005(2)
 C35 0.050(3) 0.063(4) 0.043(3) -0.009(2) -0.012(2) 0.004(3)
 C27 0.049(3) 0.054(3) 0.044(3) -0.004(2) 0.001(2) -0.002(2)
 C29 0.051(3) 0.055(3) 0.036(2) -0.006(2) -0.004(2) 0.006(2)
 C34 0.058(3) 0.055(4) 0.045(3) -0.005(2) -0.008(2) -0.002(3)
 C8 0.049(3) 0.078(4) 0.044(3) -0.006(3) -0.006(2) 0.007(3)
 C6 0.051(3) 0.082(4) 0.042(3) 0.001(3) 0.002(2) 0.015(3)
 C23 0.059(3) 0.063(4) 0.059(3) -0.007(3) 0.010(2) -0.011(3)
 C7 0.043(3) 0.088(4) 0.047(3) 0.002(3) -0.008(2) 0.003(3)
 C37 0.060(3) 0.059(4) 0.085(4) -0.010(3) -0.026(3) 0.001(3)
 C19 0.049(4) 0.141(7) 0.054(3) -0.017(4) -0.006(2) 0.006(4)
 C38 0.062(4) 0.076(5) 0.105(4) 0.007(4) -0.015(3) -0.017(3)
 C39 0.108(5) 0.081(5) 0.098(5) -0.001(4) -0.054(4) -0.016(4)
 C40 0.045(4) 0.093(6) 0.181(7) -0.048(5) -0.010(4) -0.006(3)
 C20 0.058(4) 0.181(9) 0.077(4) -0.004(5) 0.001(3) -0.007(4)
 C21 0.056(4) 0.281(14) 0.095(5) 0.028(6) -0.014(4) 0.020(5)
 C24 0.066(4) 0.232(12) 0.096(5) 0.017(6) 0.000(3) -0.047(5)
 C26 0.092(5) 0.164(9) 0.113(5) -0.060(6) 0.051(4) -0.059(5)
 C22 0.076(5) 0.148(9) 0.144(7) -0.011(6) -0.007(4) -0.016(5)
 C25 0.108(6) 0.082(6) 0.240(11) 0.015(7) 0.049(6) -0.031(5)
 C47 0.119(12) 0.094(18) 0.125(15) -0.023(14) 0.013(11) 0.006(12)
 C41 0.107(10) 0.051(12) 0.090(11) -0.016(10) -0.006(8) 0.023(9)
 C42 0.123(12) 0.043(14) 0.092(11) -0.010(11) -0.002(9) 0.031(11)
 C43 0.126(13) 0.12(2) 0.108(13) 0.004(18) 0.002(12) 0.016(13)
 C44 0.135(14) 0.13(3) 0.123(15) -0.003(18) 0.000(13) 0.002(17)
 C45 0.115(13) 0.11(3) 0.121(15) -0.010(17) -0.013(13) 0.005(14)
 C46 0.107(13) 0.064(16) 0.100(13) -0.023(14) -0.011(10) 0.028(12)
 C67 0.39(2) 0.38(2) 0.40(4) -0.02(2) 0.03(2) 0.026(15)
 C66 0.34(2) 0.38(2) 0.078(12) -0.062(16) 0.031(15) -0.002(14)
 C65 0.37(2) 0.38(2) 0.40(3) -0.08(3) 0.03(2) -0.038(18)
 C64 0.412(19) 0.35(2) 0.37(3) 0.02(2) 0.05(2) -0.003(15)
 C63 0.40(2) 0.41(2) 0.40(3) 0.05(3) 0.02(2) 0.017(15)
 C62 0.407(19) 0.383(19) 0.38(3) 0.01(2) -0.02(2) 0.011(14)
 C59 0.38(3) 0.39(3) 0.36(3) 0.02(2) -0.02(2) 0.03(2)
 C60 0.30(3) 0.39(3) 0.38(3) 0.02(2) 0.035(19) 0.01(2)
 C55 0.37(3) 0.34(3) 0.32(3) 0.01(2) -0.01(2) 0.01(2)
 C56 0.35(3) 0.26(3) 0.30(2) 0.05(2) -0.013(19) -0.05(2)
 C57 0.26(2) 0.35(3) 0.32(3) 0.03(2) 0.01(2) -0.06(2)
 C58 0.40(3) 0.41(3) 0.40(3) 0.01(2) -0.03(2) 0.03(2)
 C54 0.39(2) 0.45(3) 0.31(2) -0.10(2) -0.129(18) -0.10(2)
 C48 0.279(17) 0.32(3) 0.229(16) -0.006(17) -0.072(13) -0.057(17)
 C53 0.226(16) 0.31(3) 0.233(16) 0.007(17) -0.063(12) -0.071(16)
 C52 0.247(18) 0.33(3) 0.238(16) -0.032(18) -0.080(13) 0.017(18)
 C51 0.266(17) 0.34(3) 0.214(17) 0.042(17) -0.066(15) 0.055(19)
 C50 0.274(18) 0.30(3) 0.249(18) 0.045(18) -0.055(13) 0.058(19)
 C49 0.302(17) 0.31(3) 0.242(18) 0.028(19) -0.031(14) -0.024(18)
 C61 0.36(3) 0.33(3) 0.36(3) -0.01(2) -0.01(2) 0.02(2)
 C68 0.39(2) 0.35(2) 0.34(3) 0.00(2) -0.02(2) -0.01(2)
 C75 0.50(3) 0.43(4) 0.51(4) 0.02(3) -0.07(2) 0.06(3)
 C69 0.55(2) 0.61(4) 0.58(3) 0.03(3) -0.020(17) 0.02(3)
 C74 0.53(3) 0.55(4) 0.55(3) -0.02(3) -0.015(17) -0.01(3)
 C73 0.54(2) 0.48(4) 0.53(3) -0.05(3) 0.01(2) 0.03(2)
 C72 0.58(3) 0.56(4) 0.55(3) -0.01(3) 0.02(2) 0.03(3)
 C71 0.60(3) 0.61(4) 0.57(3) 0.03(3) -0.010(18) 0.01(3)
 C70 0.59(3) 0.62(4) 0.58(3) 0.04(3) -0.02(2) 0.00(3)

_geom_special_details
;
 All esds (except the esd in the dihedral angle between two l.s. planes)
 are estimated using the full covariance matrix.  The cell esds are taken
 into account individually in the estimation of esds in distances, angles
 and torsion angles; correlations between esds in cell parameters are only
 used when they are defined by crystal symmetry.  An approximate (isotropic)
 treatment of cell esds is used for estimating esds involving l.s. planes.
;
loop_
  _geom_bond_atom_site_label_1
  _geom_bond_atom_site_label_2
  _geom_bond_distance
  _geom_bond_site_symmetry_2
  _geom_bond_publ_flag
 C3 C16 1.475(6) . ?
 C3 C2 1.405(6) . ?
 C3 C4 1.385(5) . ?
 C16 C17 1.395(6) . ?
 C16 C15 1.381(6) . ?
 C2 C1 1.404(5) . ?
 C2 C5 1.455(6) . ?
 C17 C18 1.455(6) . ?
 C17 C12 1.414(6) . ?
 C18 C9 1.399(6) . ?
 C18 C5 1.422(6) . ?
 C9 C10 1.472(6) . ?
 C9 C8 1.393(6) . ?
 C31 C36 1.404(6) . ?
 C31 C32 1.427(6) . ?
 C31 C29 1.459(7) . ?
 C14 C15 1.391(6) . ?
 C14 C13 1.369(6) . ?
 C14 C23 1.535(7) . ?
 C12 C11 1.452(6) . ?
 C12 C13 1.403(6) . ?
 C36 C35 1.390(7) . ?
 C28 C33 1.466(6) 2_665 ?
 C28 C27 1.376(7) . ?
 C28 C29 1.425(6) . ?
 C33 C32 1.397(7) . ?
 C33 C34 1.403(6) . ?
 C11 C10 1.427(6) . ?
 C11 C27 1.397(6) . ?
 C5 C6 1.394(6) . ?
 C10 C30 1.395(7) . ?
 C32 C32 1.436(9) 2_665 ?
 C30 C29 1.383(6) . ?
 C35 C34 1.387(7) . ?
 C35 C37 1.521(7) . ?
 C8 C7 1.401(7) . ?
 C6 C7 1.396(7) . ?
 C23 C24 1.516(8) . ?
 C23 C26 1.527(7) . ?
 C23 C25 1.479(10) . ?
 C7 C19 1.516(7) . ?
 C37 C38 1.493(8) . ?
 C37 C39 1.569(8) . ?
 C37 C40 1.527(8) . ?
 C19 C20 1.454(7) . ?
 C19 C21 1.465(9) . ?
 C19 C22 1.604(11) . ?
 C47 C41 1.499(9) . ?
 C41 C42 1.387(9) . ?
 C41 C46 1.394(9) . ?
 C42 C43 1.388(10) . ?
 C43 C44 1.389(10) . ?
 C44 C45 1.387(9) . ?
 C45 C46 1.386(9) . ?
 C67 C66 1.386(9) . ?
 C67 C62 1.387(9) . ?
 C66 C65 1.390(10) . ?
 C65 C64 1.389(10) . ?
 C64 C63 1.393(10) . ?
 C63 C62 1.387(9) . ?
 C62 C68 1.497(9) . ?
 C59 C60 1.394(10) . ?
 C59 C58 1.396(10) . ?
 C60 C55 1.393(9) . ?
 C55 C56 1.385(9) . ?
 C55 C61 1.502(9) . ?
 C56 C57 1.391(9) . ?
 C57 C58 1.392(10) . ?
 C54 C48 1.504(9) . ?
 C48 C53 1.391(9) . ?
 C48 C49 1.390(9) . ?
 C53 C52 1.395(9) . ?
 C52 C51 1.395(9) . ?
 C51 C50 1.374(9) . ?
 C50 C49 1.389(9) . ?
 C75 C69 1.497(9) . ?
 C69 C74 1.398(9) . ?
 C69 C70 1.396(9) . ?
 C74 C73 1.398(10) . ?
 C73 C72 1.391(10) . ?
 C72 C71 1.396(10) . ?
 C71 C70 1.397(10) . ?

loop_
  _geom_angle_atom_site_label_1
  _geom_angle_atom_site_label_2
  _geom_angle_atom_site_label_3
  _geom_angle
  _geom_angle_site_symmetry_1
  _geom_angle_site_symmetry_3
  _geom_angle_publ_flag
 C2 C3 C16 119.6(4) . . ?
 C4 C3 C16 120.3(4) . . ?
 C4 C3 C2 118.9(4) . . ?
 C17 C16 C3 117.4(4) . . ?
 C15 C16 C3 122.2(4) . . ?
 C15 C16 C17 120.1(4) . . ?
 C3 C2 C5 120.6(4) . . ?
 C1 C2 C3 118.4(4) . . ?
 C1 C2 C5 119.9(5) . . ?
 C16 C17 C18 121.5(4) . . ?
 C16 C17 C12 119.1(4) . . ?
 C12 C17 C18 119.4(4) . . ?
 C9 C18 C17 121.2(4) . . ?
 C9 C18 C5 119.6(4) . . ?
 C5 C18 C17 119.1(4) . . ?
 C18 C9 C10 117.9(4) . . ?
 C8 C9 C18 119.9(4) . . ?
 C8 C9 C10 122.0(4) . . ?
 C36 C31 C32 118.0(5) . . ?
 C36 C31 C29 124.3(4) . . ?
 C32 C31 C29 117.5(4) . . ?
 C3 C4 C3 123.0(6) . 6_556 ?
 C15 C14 C23 120.1(4) . . ?
 C13 C14 C15 117.4(4) . . ?
 C13 C14 C23 122.5(4) . . ?
 C2 C1 C2 122.2(6) 6_556 . ?
 C17 C12 C11 118.5(4) . . ?
 C13 C12 C17 117.8(4) . . ?
 C13 C12 C11 123.5(4) . . ?
 C35 C36 C31 123.3(4) . . ?
 C27 C28 C33 119.6(4) . 2_665 ?
 C27 C28 C29 119.3(4) . . ?
 C29 C28 C33 120.0(5) . 2_665 ?
 C16 C15 C14 122.0(4) . . ?
 C32 C33 C28 117.5(4) . 2_665 ?
 C32 C33 C34 119.1(4) . . ?
 C34 C33 C28 122.8(5) . 2_665 ?
 C10 C11 C12 120.5(4) . . ?
 C27 C11 C12 120.1(4) . . ?
 C27 C11 C10 118.0(4) . . ?
 C18 C5 C2 117.6(4) . . ?
 C6 C5 C2 124.1(4) . . ?
 C6 C5 C18 117.8(4) . . ?
 C11 C10 C9 118.7(4) . . ?
 C30 C10 C9 121.9(4) . . ?
 C30 C10 C11 118.5(4) . . ?
 C31 C32 C32 120.5(6) . 2_665 ?
 C33 C32 C31 119.1(4) . . ?
 C33 C32 C32 120.4(5) . 2_665 ?
 C14 C13 C12 123.3(4) . . ?
 C29 C30 C10 123.0(4) . . ?
 C36 C35 C37 122.7(4) . . ?
 C34 C35 C36 116.6(4) . . ?
 C34 C35 C37 120.7(5) . . ?
 C28 C27 C11 122.8(4) . . ?
 C28 C29 C31 119.1(4) . . ?
 C30 C29 C31 121.7(4) . . ?
 C30 C29 C28 118.2(5) . . ?
 C35 C34 C33 122.9(5) . . ?
 C9 C8 C7 121.7(4) . . ?
 C5 C6 C7 123.3(4) . . ?
 C24 C23 C14 109.4(4) . . ?
 C24 C23 C26 106.6(6) . . ?
 C26 C23 C14 113.0(4) . . ?
 C25 C23 C14 110.0(5) . . ?
 C25 C23 C24 109.1(7) . . ?
 C25 C23 C26 108.6(6) . . ?
 C8 C7 C19 121.2(5) . . ?
 C6 C7 C8 117.1(4) . . ?
 C6 C7 C19 121.7(4) . . ?
 C35 C37 C39 106.8(4) . . ?
 C35 C37 C40 110.7(5) . . ?
 C38 C37 C35 112.0(4) . . ?
 C38 C37 C39 108.6(5) . . ?
 C38 C37 C40 108.6(5) . . ?
 C40 C37 C39 110.1(5) . . ?
 C7 C19 C22 108.3(5) . . ?
 C20 C19 C7 115.1(5) . . ?
 C20 C19 C21 115.2(6) . . ?
 C20 C19 C22 103.2(6) . . ?
 C21 C19 C7 109.9(5) . . ?
 C21 C19 C22 104.1(6) . . ?
 C42 C41 C47 121.3(12) . . ?
 C42 C41 C46 120.3(11) . . ?
 C46 C41 C47 118.4(12) . . ?
 C41 C42 C43 120.5(12) . . ?
 C42 C43 C44 119.0(12) . . ?
 C45 C44 C43 120.6(13) . . ?
 C46 C45 C44 120.3(13) . . ?
 C45 C46 C41 119.2(11) . . ?
 C66 C67 C62 121.2(13) . . ?
 C67 C66 C65 118.8(13) . . ?
 C64 C65 C66 120.8(13) . . ?
 C65 C64 C63 119.6(13) . . ?
 C62 C63 C64 120.1(12) . . ?
 C67 C62 C63 119.5(11) . . ?
 C67 C62 C68 119.1(14) . . ?
 C63 C62 C68 121.3(14) . . ?
 C60 C59 C58 121.0(18) . . ?
 C55 C60 C59 119.1(15) . . ?
 C60 C55 C61 120.1(14) . . ?
 C56 C55 C60 120.3(11) . . ?
 C56 C55 C61 119.7(14) . . ?
 C55 C56 C57 120.5(13) . . ?
 C56 C57 C58 120.0(11) . . ?
 C57 C58 C59 119.2(15) . . ?
 C53 C48 C54 121.1(13) . . ?
 C49 C48 C54 117.7(13) . . ?
 C49 C48 C53 121.2(11) . . ?
 C48 C53 C52 118.3(12) . . ?
 C51 C52 C53 120.2(12) . . ?
 C50 C51 C52 120.9(12) . . ?
 C51 C50 C49 119.4(12) . . ?
 C50 C49 C48 119.9(12) . . ?
 C74 C69 C75 120.2(14) . . ?
 C70 C69 C75 120.4(14) . . ?
 C70 C69 C74 119.5(11) . . ?
 C69 C74 C73 121.4(13) . . ?
 C72 C73 C74 119.0(13) . . ?
 C73 C72 C71 119.7(13) . . ?
 C72 C71 C70 121.5(13) . . ?
 C69 C70 C71 118.9(12) . . ?

_shelx_res_file
;
TITL cky_498_toluene_meoh_a.res
    cky_498_toluene_meoh.res
    created by SHELXL-2018/3 at 22:48:13 on 26-Mar-2020
REM Yadorkari-X generated
REM SPGR Pnnm orthorhombic
CELL 0.71073 14.5786 21.945 28.1707 90 90 90
ZERR 2 0.0007 0.002 0.0016 0 0 0
LATT 1
SYMM -X,-Y,+Z
SYMM 0.5-X,0.5+Y,0.5-Z
SYMM 0.5+X,0.5-Y,0.5-Z
SFAC C H
UNIT 438 432
DFIX 1.39 0.01 C41 C42 C42 C43 C43 C44 C44 C45 C45 C46 C46 C41
DFIX 1.39 0.01 C67 C66 C66 C65 C65 C64 C64 C63 C63 C62 C62 C67
DFIX 2.41 C41 C43 C43 C45 C45 C41 C42 C44 C44 C46 C46 C42
DFIX 2.41 C67 C65 C65 C63 C63 C67 C66 C64 C64 C62 C62 C66
DFIX 1.39 0.01 C69 C70 C70 C71 C71 C72 C72 C73 C73 C74 C74 C69
DFIX 2.41 C69 C71 C71 C73 C73 C69 C70 C72 C72 C74 C74 C70
DFIX 1.39 0.01 C59 C60 C60 C55 C55 C56 C56 C57 C57 C58 C58 C59
DFIX 2.41 C59 C55 C55 C57 C57 C59 C60 C56 C56 C58 C58 C56
DFIX 1.5 0.01 C69 C75
DFIX 2.5 C75 C70 C75 C74
DFIX 1.39 0.01 C48 C49 C49 C50 C50 C51 C51 C52 C52 C53 C53 C48
DFIX 2.41 C48 C50 C50 C52 C52 C48 C49 C51 C51 C53 C53 C49
DFIX 1.5 0.01 C41 C47 C54 C48 C55 C61 C62 C68
DFIX 2.5 C47 C42 C47 C46 C54 C49 C54 C53 C61 C60 C61 C56 C68 C67 C68 C63
FLAT 0.02 C41 C42 C43 C44 C45 C46 C47
FLAT 0.02 C67 C66 C65 C64 C63 C62 C68
FLAT 0.02 C69 C70 C71 C72 C73 C74 C75
FLAT 0.02 C59 C60 C55 C56 C57 C58 C61
FLAT 0.02 C48 C49 C50 C51 C52 C53 C54
RIGU 0.002 0.002 C41 C42 C43 C44 C45 C46 C47
RIGU 0.002 0.002 C67 C66 C65 C64 C63 C62 C68
RIGU 0.002 0.002 C69 C70 C71 C72 C73 C74 C75
RIGU 0.005 0.005 C59 C60 C55 C56 C57 C58 C61
RIGU 0.002 0.002 C48 C49 C50 C51 C52 C53 C54
ISOR 0.03 0.03 C41 C42 C43 C44 C45 C46 C47
ISOR 0.03 0.03 C67 C66 C65 C64 C63 C62 C68
ISOR 0.03 0.03 C69 C70 C71 C72 C73 C74 C75
ISOR 0.03 0.03 C59 C60 C55 C56 C57 C58 C61
ISOR 0.03 0.03 C48 C49 C50 C51 C52 C53 C54

L.S. 10
PLAN  -10
SIZE 0.1 0.1 0.1
TEMP -150(2)
fmap 2
acta 50
MERG 2
OMIT -10 50
REM <olex2.extras>
REM <HklSrc "%./CKY_498_toluene_MeOH.hkl">
REM </olex2.extras>

WGHT    0.200000
FVAR       0.10600
C3    1    0.387242    0.807586    0.456789    11.00000    0.04587    0.04500 =
         0.03928    0.00217    0.00118    0.00534
C16   1    0.442201    0.803944    0.412919    11.00000    0.04869    0.04175 =
         0.03920    0.00793   -0.00379    0.00649
C2    1    0.295464    0.788010    0.456376    11.00000    0.04611    0.05534 =
         0.03701    0.00068    0.00001    0.01281
C17   1    0.408584    0.767390    0.376324    11.00000    0.04485    0.04613 =
         0.03640    0.00643   -0.00101    0.01089
C18   1    0.313940    0.746431    0.375793    11.00000    0.04762    0.04860 =
         0.03694    0.00262   -0.00330    0.00628
C9    1    0.280023    0.711044    0.338393    11.00000    0.04810    0.05678 =
         0.03981    0.00055   -0.00098    0.00525
C31   1    0.377288    0.528525    0.248398    11.00000    0.05181    0.05206 =
         0.03551   -0.00149   -0.00245    0.00255
C4    1    0.429420    0.818630    0.500000    10.50000    0.04602    0.05131 =
         0.03952    0.00000    0.00000   -0.00017
AFIX  43
H4    2    0.490044    0.834507    0.500000    10.50000   -1.20000
AFIX   0
C14   1    0.585416    0.818666    0.370755    11.00000    0.05386    0.04575 =
         0.04811   -0.00350    0.00228   -0.00026
C1    1    0.250278    0.780617    0.500000    10.50000    0.04428    0.06126 =
         0.04439    0.00000    0.00000    0.01174
AFIX  43
H1    2    0.187004    0.770266    0.500001    10.50000   -1.20000
AFIX   0
C12   1    0.467310    0.751865    0.338233    11.00000    0.04973    0.04524 =
         0.04347    0.00530    0.00007    0.00284
C36   1    0.289966    0.503760    0.240037    11.00000    0.04185    0.06051 =
         0.04635   -0.01086   -0.00858    0.00712
AFIX  43
H36   2    0.238895    0.530624    0.239172    11.00000   -1.20000
AFIX   0
C28   1    0.485598    0.614617    0.260567    11.00000    0.05078    0.05490 =
         0.03637    0.00032    0.00515    0.00282
C15   1    0.528080    0.830025    0.409211    11.00000    0.05404    0.04884 =
         0.03928    0.00369    0.00001    0.00108
AFIX  43
H15   2    0.548631    0.856529    0.433662    11.00000   -1.20000
AFIX   0
C33   1    0.438755    0.425399    0.246280    11.00000    0.04918    0.05090 =
         0.03559   -0.00362   -0.00157    0.00165
C11   1    0.438878    0.703773    0.306010    11.00000    0.05278    0.04950 =
         0.03731    0.00021    0.00000    0.00321
C5    1    0.254081    0.764579    0.413066    11.00000    0.04100    0.05901 =
         0.04181    0.00052   -0.00474    0.01122
C10   1    0.346834    0.681612    0.306639    11.00000    0.04939    0.05888 =
         0.03709   -0.00204   -0.00590    0.00640
C32   1    0.454082    0.488189    0.247848    11.00000    0.04583    0.05228 =
         0.04077    0.00165   -0.00259    0.00170
C13   1    0.553598    0.780107    0.336265    11.00000    0.04926    0.05666 =
         0.04831    0.00200    0.00677    0.00307
AFIX  43
H13   2    0.591835    0.772075    0.309685    11.00000   -1.20000
AFIX   0
C30   1    0.327443    0.626975    0.283366    11.00000    0.04363    0.06529 =
         0.04109   -0.00296   -0.01069    0.00488
AFIX  43
H30   2    0.265642    0.613307    0.282365    11.00000   -1.20000
AFIX   0
C35   1    0.274470    0.441947    0.232964    11.00000    0.04973    0.06315 =
         0.04279   -0.00915   -0.01236    0.00373
C27   1    0.504582    0.669989    0.281276    11.00000    0.04942    0.05411 =
         0.04434   -0.00400    0.00144   -0.00206
AFIX  43
H27   2    0.564951    0.685934    0.278645    11.00000   -1.20000
AFIX   0
C29   1    0.394117    0.591824    0.261694    11.00000    0.05100    0.05473 =
         0.03637   -0.00622   -0.00400    0.00606
C34   1    0.349889    0.403794    0.237128    11.00000    0.05772    0.05531 =
         0.04467   -0.00535   -0.00781   -0.00175
AFIX  43
H34   2    0.340999    0.361144    0.233629    11.00000   -1.20000
AFIX   0
C8    1    0.186119    0.700285    0.334653    11.00000    0.04911    0.07770 =
         0.04435   -0.00638   -0.00558    0.00731
AFIX  43
H8    2    0.163608    0.677515    0.308444    11.00000   -1.20000
AFIX   0
C6    1    0.160763    0.752477    0.407795    11.00000    0.05051    0.08215 =
         0.04195    0.00061    0.00213    0.01529
AFIX  43
H6    2    0.120107    0.765488    0.432122    11.00000   -1.20000
AFIX   0
C23   1    0.680781    0.848169    0.368434    11.00000    0.05881    0.06252 =
         0.05939   -0.00735    0.00980   -0.01146
C7    1    0.124042    0.722201    0.368569    11.00000    0.04294    0.08754 =
         0.04688    0.00160   -0.00842    0.00303
C37   1    0.180474    0.416358    0.220609    11.00000    0.05964    0.05866 =
         0.08469   -0.00978   -0.02576    0.00077
C19   1    0.021622    0.712700    0.362994    11.00000    0.04937    0.14088 =
         0.05366   -0.01698   -0.00575    0.00585
C38   1    0.167772    0.353207    0.239150    11.00000    0.06159    0.07612 =
         0.10548    0.00655   -0.01548   -0.01663
AFIX 137
H38A  2    0.205146    0.324836    0.220504    11.00000   -1.50000
H38B  2    0.103000    0.341707    0.236633    11.00000   -1.50000
H38C  2    0.186831    0.351612    0.272488    11.00000   -1.50000
AFIX   0
C39   1    0.174390    0.414606    0.165030    11.00000    0.10782    0.08104 =
         0.09848   -0.00112   -0.05386   -0.01627
AFIX 137
H39A  2    0.183239    0.455781    0.152365    11.00000   -1.50000
H39B  2    0.113971    0.399349    0.155475    11.00000   -1.50000
H39C  2    0.222158    0.387593    0.152528    11.00000   -1.50000
AFIX   0
C40   1    0.104547    0.456742    0.240718    11.00000    0.04504    0.09291 =
         0.18135   -0.04779   -0.01035   -0.00613
AFIX 137
H40A  2    0.111489    0.459826    0.275236    11.00000   -1.50000
H40B  2    0.044676    0.438860    0.233225    11.00000   -1.50000
H40C  2    0.108747    0.497460    0.226597    11.00000   -1.50000
AFIX   0
C20   1   -0.032743    0.726099    0.405004    11.00000    0.05787    0.18067 =
         0.07731   -0.00436    0.00118   -0.00735
AFIX 137
H20A  2   -0.008776    0.702947    0.432043    11.00000   -1.50000
H20B  2   -0.096751    0.714589    0.399299    11.00000   -1.50000
H20C  2   -0.029335    0.769791    0.411979    11.00000   -1.50000
AFIX   0
C21   1   -0.010303    0.741619    0.319146    11.00000    0.05577    0.28073 =
         0.09525    0.02793   -0.01394    0.02045
AFIX 137
H21A  2   -0.005673    0.785991    0.322253    11.00000   -1.50000
H21B  2   -0.074336    0.730257    0.313335    11.00000   -1.50000
H21C  2    0.027738    0.727959    0.292512    11.00000   -1.50000
AFIX   0
C24   1    0.734188    0.832221    0.412916    11.00000    0.06564    0.23209 =
         0.09597    0.01743   -0.00034   -0.04669
AFIX 137
H24A  2    0.699191    0.844836    0.440944    11.00000   -1.50000
H24B  2    0.793363    0.853401    0.412527    11.00000   -1.50000
H24C  2    0.744529    0.788119    0.414026    11.00000   -1.50000
AFIX   0
C26   1    0.737878    0.825868    0.326430    11.00000    0.09207    0.16423 =
         0.11302   -0.06042    0.05061   -0.05857
AFIX 137
H26A  2    0.744411    0.781477    0.328144    11.00000   -1.50000
H26B  2    0.798684    0.844859    0.327482    11.00000   -1.50000
H26C  2    0.707176    0.836958    0.296713    11.00000   -1.50000
AFIX   0
C22   1    0.003329    0.641437    0.354488    11.00000    0.07613    0.14834 =
         0.14422   -0.01092   -0.00658   -0.01566
AFIX 137
H22A  2    0.040881    0.627148    0.327868    11.00000   -1.50000
H22B  2   -0.061672    0.634964    0.347193    11.00000   -1.50000
H22C  2    0.019605    0.618673    0.383207    11.00000   -1.50000
AFIX   0
C25   1    0.671807    0.915152    0.365155    11.00000    0.10829    0.08154 =
         0.24045    0.01498    0.04926   -0.03106
AFIX 137
H25A  2    0.632627    0.925626    0.338090    11.00000   -1.50000
H25B  2    0.732596    0.933366    0.360770    11.00000   -1.50000
H25C  2    0.644251    0.930858    0.394432    11.00000   -1.50000
AFIX   0

PART -2
C47   1    0.681057    1.043267    0.471191    10.25000    0.11909    0.09439 =
         0.12451   -0.02350    0.01350    0.00612
AFIX  33
H47A  2    0.678031    1.041210    0.436475    10.25000   -1.50000
H47B  2    0.693993    1.085242    0.480999    10.25000   -1.50000
H47C  2    0.729951    1.016373    0.482637    10.25000   -1.50000
AFIX   0
C41   1    0.591082    1.023342    0.491788    10.25000    0.10692    0.05052 =
         0.08989   -0.01634   -0.00569    0.02283
C42   1    0.576853    1.021970    0.540453    10.25000    0.12312    0.04271 =
         0.09158   -0.01004   -0.00175    0.03112
AFIX  43
H42   2    0.624778    1.033878    0.561336    10.25000   -1.20000
AFIX   0
C43   1    0.493158    1.003340    0.558878    10.25000    0.12576    0.12333 =
         0.10758    0.00441    0.00230    0.01634
AFIX  43
H43   2    0.483421    1.002456    0.592216    10.25000   -1.20000
AFIX   0
C44   1    0.423803    0.985998    0.527872    10.25000    0.13455    0.12650 =
         0.12331   -0.00342    0.00047    0.00175
AFIX  43
H44   2    0.366268    0.973153    0.540143    10.25000   -1.20000
AFIX   0
C45   1    0.437736    0.987256    0.479174    10.25000    0.11488    0.10886 =
         0.12106   -0.01041   -0.01340    0.00501
AFIX  43
H45   2    0.389929    0.975002    0.458342    10.25000   -1.20000
AFIX   0
C46   1    0.521130    1.006319    0.460778    10.25000    0.10748    0.06420 =
         0.10021   -0.02260   -0.01056    0.02793
AFIX  43
H46   2    0.530493    1.007763    0.427424    10.25000   -1.20000
AFIX   0

C67   1    0.240595    0.423717    0.374371    10.50000    0.38962    0.38305 =
         0.39508   -0.02251    0.03257    0.02570
AFIX  43
H67   2    0.178906    0.409806    0.375149    10.50000   -1.20000
AFIX   0
C66   1    0.311336    0.381576    0.372615    10.50000    0.33854    0.37679 =
         0.07797   -0.06177    0.03138   -0.00236
AFIX  43
H66   2    0.298590    0.339128    0.372076    10.50000   -1.20000
AFIX   0
C65   1    0.401287    0.402578    0.371656    10.50000    0.36653    0.37571 =
         0.40103   -0.08120    0.02853   -0.03849
AFIX  43
H65   2    0.450398    0.374164    0.370502    10.50000   -1.20000
AFIX   0
C64   1    0.420219    0.464614    0.372365    10.50000    0.41224    0.35429 =
         0.37220    0.01774    0.04679   -0.00296
AFIX  43
H64   2    0.481904    0.478544    0.371690    10.50000   -1.20000
AFIX   0
C63   1    0.348180    0.506270    0.374070    10.50000    0.40043    0.40601 =
         0.39910    0.04649    0.02299    0.01716
AFIX  43
H63   2    0.360712    0.548747    0.374587    10.50000   -1.20000
AFIX   0
C62   1    0.258206    0.485804    0.375013    10.50000    0.40702    0.38306 =
         0.38171    0.01357   -0.01704    0.01107

PART 0
PART -3
C59   1    0.197031    0.415416    0.564573    10.50000    0.37927    0.38637 =
         0.36070    0.02177   -0.01823    0.03379
AFIX  43
H59   2    0.144096    0.437439    0.554956    10.50000   -1.20000
AFIX   0
C60   1    0.235039    0.372267    0.534063    10.50000    0.30049    0.38668 =
         0.37750    0.02430    0.03539    0.00745
AFIX  43
H60   2    0.208675    0.365062    0.503739    10.50000   -1.20000
AFIX   0
C55   1    0.312191    0.339856    0.548635    10.50000    0.37289    0.33891 =
         0.32204    0.00669   -0.01118    0.01408
C56   1    0.350581    0.350665    0.592796    10.50000    0.35185    0.25631 =
         0.30444    0.05479   -0.01346   -0.05274
AFIX  43
H56   2    0.403773    0.328830    0.602292    10.50000   -1.20000
AFIX   0
C57   1    0.311813    0.393264    0.623348    10.50000    0.25683    0.34597 =
         0.31650    0.02585    0.01011   -0.06102
AFIX  43
H57   2    0.337362    0.399509    0.653987    10.50000   -1.20000
AFIX   0
C58   1    0.235607    0.426742    0.609048    10.50000    0.40336    0.40790 =
         0.39663    0.00513   -0.02831    0.02865
AFIX  43
H58   2    0.210152    0.456935    0.629309    10.50000   -1.20000
AFIX   0

PART 0
PART -1
C54   1    0.917240    0.915375    0.491708    10.50000    0.39244    0.44508 =
         0.31001   -0.09858   -0.12861   -0.10442
AFIX  33
H54A  2    0.854798    0.931628    0.494090    10.50000   -1.50000
H54B  2    0.948943    0.934683    0.464972    10.50000   -1.50000
H54C  2    0.914603    0.871234    0.486614    10.50000   -1.50000
AFIX   0
C48   1    0.968448    0.928538    0.536887    10.50000    0.27910    0.31905 =
         0.22882   -0.00616   -0.07208   -0.05651
C53   1    0.926970    0.959893    0.574027    10.50000    0.22650    0.31128 =
         0.23270    0.00654   -0.06345   -0.07138
AFIX  43
H53   2    0.865805    0.974404    0.571285    10.50000   -1.20000
AFIX   0
C52   1    0.977484    0.969492    0.615418    10.50000    0.24665    0.33079 =
         0.23818   -0.03246   -0.08015    0.01657
AFIX  43
H52   2    0.949663    0.988902    0.641901    10.50000   -1.20000
AFIX   0
C51   1    1.068709    0.950672    0.618020    10.50000    0.26622    0.34065 =
         0.21441    0.04242   -0.06618    0.05500
AFIX  43
H51   2    1.103489    0.959347    0.645726    10.50000   -1.20000
AFIX   0
C50   1    1.109014    0.919756    0.581083    10.50000    0.27408    0.29673 =
         0.24906    0.04462   -0.05516    0.05835
AFIX  43
H50   2    1.170634    0.906042    0.583572    10.50000   -1.20000
AFIX   0
C49   1    1.058782    0.908751    0.540072    10.50000    0.30209    0.31141 =
         0.24172    0.02795   -0.03100   -0.02370
AFIX  43
H49   2    1.086158    0.887718    0.514225    10.50000   -1.20000
AFIX   0

PART 0
PART -3
C61   1    0.354694    0.293346    0.516277    10.50000    0.35558    0.32944 =
         0.35557   -0.00728   -0.01024    0.01789
AFIX  33
H61A  2    0.319569    0.291223    0.486662    10.50000   -1.50000
H61B  2    0.418114    0.305080    0.509243    10.50000   -1.50000
H61C  2    0.354128    0.253394    0.531816    10.50000   -1.50000
AFIX   0

PART 0
PART -2
C68   1    0.179390    0.529431    0.377386    10.50000    0.38516    0.35439 =
         0.33567    0.00054   -0.02006   -0.01306
AFIX  33
H68A  2    0.202739    0.571307    0.377577    10.50000   -1.50000
H68B  2    0.139688    0.523535    0.349692    10.50000   -1.50000
H68C  2    0.144151    0.522009    0.406441    10.50000   -1.50000
AFIX   0

PART 0
PART -1
C75   1    0.571641    0.369788    0.534730    10.50000    0.49534    0.42598 =
         0.51025    0.02002   -0.07263    0.06465
AFIX  33
H75A  2    0.586789    0.354713    0.566523    10.50000   -1.50000
H75B  2    0.534229    0.406726    0.537444    10.50000   -1.50000
H75C  2    0.537231    0.338506    0.517431    10.50000   -1.50000
AFIX   0
C69   1    0.658235    0.384181    0.508435    10.50000    0.54593    0.60750 =
         0.57673    0.02690   -0.02021    0.01828
C74   1    0.743382    0.375336    0.530171    10.50000    0.52827    0.54672 =
         0.55213   -0.01713   -0.01494   -0.00874
AFIX  43
H74   2    0.745602    0.360276    0.561767    10.50000   -1.20000
AFIX   0
C73   1    0.825351    0.388162    0.506437    10.50000    0.53871    0.47695 =
         0.52711   -0.05398    0.00931    0.02695
AFIX  43
H73   2    0.882738    0.381629    0.521581    10.50000   -1.20000
AFIX   0
C72   1    0.821601    0.410637    0.460304    10.50000    0.58051    0.55661 =
         0.55220   -0.01021    0.01803    0.03466
AFIX  43
H72   2    0.876580    0.419936    0.443714    10.50000   -1.20000
AFIX   0
C71   1    0.736657    0.419453    0.438520    10.50000    0.59801    0.61210 =
         0.57208    0.02599   -0.00989    0.00964
AFIX  43
H71   2    0.734568    0.434597    0.406946    10.50000   -1.20000
AFIX   0
C70   1    0.654651    0.406520    0.462083    10.50000    0.58604    0.62426 =
         0.57967    0.04165   -0.02381   -0.00322
AFIX  43
H70   2    0.597340    0.412826    0.446804    10.50000   -1.20000
AFIX   0
HKLF 4


REM  cky_498_toluene_meoh_a.res
REM wR2 = 0.3959, GooF = S = 1.261, Restrained GooF = 1.249 for all data
REM R1 = 0.1277 for 3965 Fo > 4sig(Fo) and 0.2190 for all 8118 data
REM 679 parameters refined using 530 restraints

END

WGHT      0.2000      0.0000

REM Highest difference peak  0.750,  deepest hole -0.546,  1-sigma level  0.107
Q1    1   0.9056  0.3956  0.5000  10.50000  0.05    0.75
Q2    1  -0.0139  0.8019  0.3563  11.00000  0.05    0.70
Q3    1   0.5000  0.5000  0.3729  10.50000  0.05    0.62
Q4    1   0.4760  0.5191  0.3748  11.00000  0.05    0.62
Q5    1   0.4643  0.5349  0.3778  11.00000  0.05    0.62
Q6    1   0.9766  0.4322  0.5000  10.50000  0.05    0.60
Q7    1   0.9762  0.9176  0.6251  11.00000  0.05    0.53
Q8    1   0.6188  0.4713  0.5000  10.50000  0.05    0.52
Q9    1   0.9091  1.0168  0.6102  11.00000  0.05    0.49
Q10   1   0.9502  0.9904  0.6164  11.00000  0.05    0.47
;
_shelx_res_checksum                93622
_shelx_hkl_file
;
   0   0  -2 7.54250 0.39744   2
   0   0   3 0.19179 0.11356   2
   0   0  -3 0.02068 0.10040   2
   0   0   4 79.5509 4.17361   2
   0   0  -4 81.5826 4.17378   2
   0   0   5 0.27182 0.20170   2
   0   0  -5-0.12417 0.18732   2
   0   0   6 586.106 30.5144   2
   0   0  -6 594.650 30.5149   2
   0   0  -7-0.58296 0.24267   2
   0   0   7-0.69279 0.27444   2
   0   0   8 1806.17 93.2345   2
   0   0  -8 1801.86 93.2354   2
   0   0   9-0.44711 0.29057   2
   0   0  -9-0.24154 0.25768   2
   0   0 -10 280.979 14.3139   2
   0   0  10 272.480 14.3118   2
   0   0 -11-0.22398 0.28229   2
   0   0  11-0.25977 0.32798   2
   0   0  12 216.585 11.4931   2
   0   0 -12 228.027 11.4976   2
   0   0  13-0.02063 0.35022   2
   0   0 -13-0.23756 0.32065   2
   0   0 -14 54.3644 2.83896   2
   0   0  14 53.5484 2.83760   2
   0   0  15-0.05675 0.35437   2
   0   0 -15-0.64261 0.35781   2
   0   0 -16 36.5934 1.86229   2
   0   0  16 32.8112 1.86014   2
   0   0  17 0.20235 0.36379   2
   0   0 -17-0.18902 0.38072   2
   0   0  18 26.7116 1.53913   2
   0   0 -18 29.7405 1.54923   2
   0   0  19-0.47904 0.38548   2
   0   0 -19-0.24959 0.42626   2
   0   0 -20 0.32520 0.44620   2
   0   0 -21 0.69322 0.45592   2
   0   0 -22 51.8441 2.77352   2
   0   0 -23 0.04259 0.54182   2
   0   0 -24 167.994 8.75814   2
   0   0 -25-0.00951 0.58973   2
   0   0 -26 1.47492 0.65201   2
   0   0 -27 0.34012 0.72504   2
   0   0 -28 31.6186 1.89853   2
   0   0 -29 0.58965 0.72451   2
   0   0 -30 2.29703 0.77280   2
   0   0 -31-0.63686 0.76285   2
   0   0 -32 13.0497 1.10504   2
   0   0 -33-0.93166 0.82780   2
   0  -1  -2 0.37089 0.09316   2
   0  -1   3 10.7389 0.49134   2
   0   1  -3 8.21369 0.48108   2
   0   1   3 8.52279 0.49055   2
   0  -1  -3 8.75592 0.48722   2
   0   1   4 0.20410 0.20388   2
   0   1  -4-0.17745 0.16950   2
   0  -1   4 0.10868 0.18079   2
   0  -1  -4 0.04629 0.17005   2
   0  -1  -5 28.2183 1.49931   2
   0   1   5 28.8886 1.50293   2
   0  -1   5 28.2563 1.49757   2
   0   1  -5 28.6602 1.49854   2
   0  -1  -6 0.13683 0.24285   2
   0  -1   6 0.48506 0.26273   2
   0   1  -6 0.38225 0.22799   2
   0  -1   6 0.59879 0.30297   1
   0   1   6 0.08774 0.28118   2
   0  -1   7 51.9948 2.75669   2
   0   1   7 49.9441 2.75995   2
   0   1  -7 53.1533 2.75469   2
   0  -1  -7 53.9347 2.75781   2
   0  -1   7 55.1530 2.75910   1
   0   1   8 0.25610 0.30302   2
   0  -1   8-0.29554 0.31283   1
   0  -1   8-0.23816 0.28037   2
   0  -1  -8-0.20898 0.27635   2
   0   1  -8 0.17908 0.24814   2
   0   1  -9 1.28613 0.28891   2
   0  -1   9 0.34374 0.29284   2
   0  -1  -9 0.73295 0.29043   2
   0   1   9 0.88154 0.31447   2
   0   1  10-0.00327 0.30919   2
   0  -1 -10 0.56554 0.28120   2
   0   1 -10-0.14971 0.26400   2
   0  -1  10-0.19869 0.30713   2
   0  -1  11 15.9441 0.88511   2
   0   1 -11 15.7147 0.88954   2
   0   1  11 15.1090 0.89631   2
   0  -1 -11 15.7037 0.89162   2
   0   1 -12 0.01594 0.30047   2
   0  -1  12-0.31901 0.33475   2
   0   1  12-0.13701 0.34551   2
   0  -1 -12-0.09540 0.42781   1
   0  -1 -12 0.23269 0.30239   2
   0   1  13 62.5082 3.24072   2
   0  -1  13 61.2990 3.23698   2
   0   1 -13 60.3037 3.23884   2
   0  -1 -13 62.8608 3.25089   1
   0  -1 -13 62.6579 3.24327   2
   0  -1 -14-0.18678 0.43804   1
   0   1 -14 0.05125 0.33771   2
   0   1  14 0.00916 0.36033   2
   0  -1  14 0.42517 0.34855   2
   0  -1 -14-0.10656 0.33803   2
   0   1 -15 107.712 5.50393   2
   0  -1  15 101.187 5.49718   2
   0   1  15 104.630 5.50150   2
   0  -1 -15 106.159 5.50332   1
   0  -1 -15 109.370 5.50441   2
   0  -1 -16-0.17082 0.36356   2
   0   1 -16-0.12498 0.36590   2
   0   1  16-0.23709 0.36375   2
   0  -1  16 0.36530 0.35808   2
   0   1 -17 14.6109 0.84989   2
   0   1  17 13.4001 0.84600   2
   0  -1 -17 13.9004 0.85658   2
   0  -1  17 14.3385 0.84796   2
   0  -1  18 0.30449 0.37889   2
   0   1  18-0.07526 0.39479   2
   0   1 -18 0.25984 0.38329   2
   0  -1 -18 0.07277 0.38587   2
   0   1 -19 13.8937 0.84947   2
   0  -1  19 12.3470 0.83415   2
   0   1  19 13.7109 0.84405   2
   0  -1 -19 14.0894 0.85219   2
   0   1 -20-0.49171 0.46611   2
   0  -1 -20 0.69193 0.44382   2
   0   1 -21 8.78905 0.69035   2
   0  -1 -21 8.82331 0.67358   2
   0  -1 -22 0.89223 0.48998   2
   0   1 -22 0.86047 0.52507   2
   0   1 -23 1.45430 0.58820   2
   0  -1 -23 1.95658 0.56326   2
   0   1 -24 2.00152 0.70925   2
   0  -1 -24-0.27233 0.57624   2
   0  -1 -25 12.1041 0.87935   2
   0   1 -25 12.0491 0.93292   2
   0  -1 -26 0.00987 0.60244   2
   0   1 -26 0.23456 0.61516   2
   0  -1 -27 1.93433 0.67184   2
   0   1 -27 2.68880 0.68226   2
   0   1 -28-1.38888 0.69297   2
   0  -1 -28-0.16606 0.67320   2
   0  -1 -29 1.31178 0.72149   2
   0   1 -29 0.40817 0.67383   2
   0   1 -30-0.43309 0.71737   2
   0  -1 -30 0.28449 0.79986   2
   0   1 -31 1.26363 0.75025   2
   0  -1 -31 1.56121 0.94530   2
   0  -1 -32-0.70096 0.81059   2
   0   1 -32 0.21800 0.78176   2
   0   1 -33 0.82677 0.83779   2
   0  -1 -33 1.85567 0.81521   2
   0  -2   0 222.995 11.5415   2
   0  -2  -1 0.51046 0.18066   2
   0   2   1 0.00186 0.19678   2
   0   2   2 54.2290 2.83889   2
   0  -2  -2 54.9577 2.83742   2
   0   2   3 0.28487 0.23932   2
   0  -2  -3 0.15812 0.20317   2
   0  -2   4 2483.54 132.040   2
   0  -2  -4 2602.16 132.044   2
   0   2   4 2609.07 132.044   2
   0  -2  -5 0.35012 0.24867   2
   0  -2   5 0.63300 0.26152   2
   0  -2  -6 1215.21 63.3285   2
   0  -2   6 1168.61 63.3254   2
   0   2  -6 1187.21 63.3264   2
   0  -2   6 1310.17 63.3255   1
   0   2   6 1246.56 63.3296   2
   0  -2  -7-0.23555 0.29209   2
   0   2   7-0.17854 0.30445   2
   0  -2   7-0.23583 0.29940   1
   0  -2   7-0.15329 0.29239   2
   0   2  -7-0.35936 0.26983   2
   0  -2   8 849.437 42.4893   1
   0  -2   8 810.923 42.4909   2
   0  -2  -8 839.117 42.4953   2
   0   2   8 814.023 42.4933   2
   0   2  -8 794.612 42.4921   2
   0  -2   9 0.16838 0.31789   1
   0   2   9-0.51805 0.34554   2
   0  -2   9 0.03211 0.30165   2
   0  -2  -9-0.29223 0.28205   2
   0   2  -9-0.74461 0.29895   2
   0  -2 -10 398.398 21.2160   2
   0  -2  10 402.691 21.2128   2
   0  -2  10 429.324 21.2110   1
   0   2 -10 415.323 21.2155   2
   0   2  10 401.310 21.2151   2
   0   2  11-0.03116 0.36037   2
   0  -2  11-0.04760 0.31409   2
   0   2 -11-0.15753 0.30554   2
   0  -2  11-0.01141 0.36959   1
   0  -2 -11-0.53995 0.31426   2
   0   2 -12 2.28212 0.38503   2
   0  -2 -12 1.96918 0.35575   2
   0   2  12 2.03923 0.39318   2
   0  -2  12 2.37546 0.35886   2
   0  -2  12 2.76269 0.41317   1
   0  -2 -13 0.26315 0.32271   2
   0   2 -13 0.17974 0.39380   2
   0   2  13-0.16895 0.36436   2
   0  -2  13 0.22285 0.34955   2
   0   2 -14 55.8041 2.75605   2
   0  -2 -14 51.0061 2.74009   2
   0  -2  14 49.5157 2.73352   2
   0   2  14 52.6120 2.74220   2
   0  -2  15 0.10436 0.35976   2
   0  -2 -15-0.42746 0.37366   2
   0   2  15 0.23993 0.38893   2
   0   2 -16 75.1357 3.70428   2
   0  -2 -16 70.2666 3.69769   2
   0  -2  16 69.2332 3.68737   2
   0  -2 -16 71.1259 3.71117   1
   0   2  16 67.5048 3.69396   2
   0  -2  17-0.09537 0.35711   2
   0  -2 -17 0.03099 0.36599   2
   0   2 -17-0.15897 0.40635   2
   0  -2 -17-0.18612 0.47419   1
   0   2  17 0.04116 0.39795   2
   0  -2 -18 4.76178 0.56183   1
   0  -2 -18 4.46814 0.46564   2
   0  -2  18 4.04763 0.45384   2
   0   2 -18 4.24521 0.47212   2
   0   2  18 4.19360 0.47830   2
   0   2 -19-0.02143 0.44797   2
   0  -2 -19-0.60919 0.43475   2
   0  -2 -19-0.10153 0.51685   1
   0  -2 -20 1.54208 0.46522   2
   0  -2 -20 2.47111 0.58841   1
   0   2 -20 2.02563 0.48710   2
   0  -2 -21-1.31668 0.56227   1
   0  -2 -21 0.30287 0.48058   2
   0   2 -21 0.28560 0.46106   2
   0  -2 -22 59.2754 3.12409   2
   0   2 -22 57.8903 3.11708   2
   0  -2 -23 0.10479 0.55065   2
   0   2 -23-0.12733 0.53087   2
   0   2 -24 23.0976 1.38840   2
   0  -2 -24 23.3891 1.38148   2
   0   2 -25 0.42702 0.58841   2
   0  -2 -25 0.81837 0.59105   2
   0  -2 -26 0.69128 0.61150   2
   0   2 -26 0.03903 0.61832   2
   0   2 -27-0.02053 0.64702   2
   0  -2 -27-0.13784 0.63247   2
   0  -2 -28 32.6099 1.81025   2
   0   2 -28 29.7654 1.81023   2
   0   2 -29-0.06841 0.69997   2
   0  -2 -29-0.16003 0.67600   2
   0  -2 -30 4.52035 0.76634   2
   0   2 -30 3.87447 0.79969   2
   0   2 -31 2.16678 0.79955   2
   0  -2 -31-1.73761 0.77141   2
   0   2 -32 3.32594 0.82784   2
   0  -2 -32 4.81322 0.87376   2
   0  -2 -33 0.23068 0.91953   2
   0   2 -33-0.11986 0.81644   2
   0  -3   0-0.13855 0.43513   2
   0   3   1 8.52186 0.57905   2
   0  -3  -1 7.05595 0.51532   2
   0   3   2 0.19066 0.31042   2
   0  -3  -2 0.49953 0.27203   2
   0  -3  -3 48.3090 2.59926   2
   0   3   3 51.5182 2.60642   2
   0   3   4 0.10776 0.33699   2
   0  -3  -4 0.71615 0.30259   2
   0  -3  -5 926.383 47.7728   2
   0   3   5 921.880 47.7742   2
   0   3   6 0.31010 0.34139   2
   0  -3  -6 0.17339 0.28712   2
   0  -3   6 0.07067 0.28606   2
   0  -3   7 83.0235 4.12021   1
   0  -3   7 82.0532 4.11881   2
   0   3   7 74.4243 4.12677   2
   0  -3  -7 75.8517 4.12388   2
   0  -3   8-0.05846 0.31114   1
   0  -3   8-0.32272 0.32718   2
   0  -3  -8 0.44406 0.30247   2
   0   3   8 0.07375 0.33915   2
   0  -3   9 23.6867 1.30787   1
   0  -3  -9 24.0551 1.30403   2
   0  -3   9 24.0459 1.29871   2
   0   3   9 25.0051 1.32245   2
   0  -3  10 0.28638 0.37159   1
   0  -3 -10-0.25716 0.31791   2
   0   3 -10-0.08728 0.29179   2
   0  -3  10-0.11887 0.31721   2
   0   3  10-0.05979 0.35134   2
   0   3  11 55.4731 2.81445   2
   0   3 -11 52.4694 2.80185   2
   0  -3  11 53.8528 2.80242   1
   0  -3  11 54.0686 2.80155   2
   0  -3 -11 51.5900 2.80349   2
   0  -3  12 0.38742 0.38437   1
   0   3  12-0.03610 0.36850   2
   0  -3  12-0.47708 0.35107   2
   0   3 -12-0.25768 0.30623   2
   0  -3 -12 0.11847 0.32292   2
   0  -3  13 2.55015 0.36370   2
   0   3 -13 1.80767 0.37457   2
   0   3  13 2.39911 0.40477   2
   0  -3 -13 1.72590 0.37271   2
   0  -3  13 2.39379 0.40493   1
   0   3 -14-0.06329 0.34823   2
   0  -3  14-0.46976 0.42656   1
   0   3  14-0.34934 0.38394   2
   0  -3 -14-0.11128 0.37725   2
   0  -3  14 0.45534 0.34934   2
   0  -3  15 2.91309 0.40253   2
   0  -3  15 2.84263 0.45436   1
   0  -3 -15 2.75545 0.40759   2
   0   3  15 3.43661 0.42768   2
   0   3 -15 2.55113 0.39366   2
   0  -3 -16-0.60118 0.38115   2
   0   3 -16-0.62056 0.37265   2
   0  -3  16-0.11305 0.35876   2
   0   3  16 0.15868 0.38239   2
   0   3 -17 1.98350 0.40595   2
   0  -3 -17 2.51882 0.42810   2
   0  -3  17 2.73340 0.40105   2
   0   3  17 1.55072 0.41990   2
   0   3 -18 0.71920 0.39585   2
   0  -3  18 0.06338 0.38425   2
   0   3  18 0.46069 0.40851   2
   0  -3 -18-0.28443 0.39367   2
   0  -3 -19 0.41666 0.43257   2
   0   3 -19 0.02705 0.39062   2
   0  -3 -19 1.84063 0.60140   1
   0   3 -20-0.23653 0.46158   2
   0  -3 -20 0.20495 0.45559   2
   0  -3 -20 0.67006 0.60901   1
   0   3 -21 1.09593 0.48403   2
   0  -3 -21 0.92681 0.46660   2
   0  -3 -21 0.90648 0.61501   1
   0   3 -22-0.17675 0.51509   2
   0  -3 -22-0.93632 0.49774   2
   0  -3 -22 0.85715 0.65526   1
   0  -3  22-0.26431 0.26145   3
   0  -3 -23 57.2209 2.97221   2
   0   3 -23 53.7368 2.97069   2
   0  -3 -24 1.08951 0.59663   2
   0   3 -24 0.13803 0.56283   2
   0  -3 -25 1.28059 0.59975   2
   0   3 -25-0.03845 0.61078   2
   0   3 -26 0.75624 0.65110   2
   0  -3 -26 1.50480 0.60400   2
   0  -3 -27-0.22190 0.63241   2
   0   3 -27 0.80927 0.68793   2
   0   3 -28 0.86521 0.71074   2
   0  -3 -28-0.92440 0.64680   2
   0   3 -29 1.24027 0.71697   2
   0  -3 -29 1.02719 0.71694   2
   0  -3 -30 0.16867 0.72214   2
   0  -3 -31 1.47124 0.78372   2
   0  -3 -32 2.15563 0.79342   2
   0  -3 -33 2.40643 0.86888   2
   0  -4   0 217.138 11.2674   2
   0  -4  -1 0.70509 0.43072   2
   0   4   1 1.12157 0.59747   2
   0  -4  -2 42.4814 2.33504   2
   0   4   2 46.8790 2.36490   2
   0   4   3 0.48799 0.42828   2
   0  -4  -3 0.08739 0.36353   2
   0  -4  -4 528.158 27.6401   2
   0   4   4 541.586 27.6428   2
   0   4   5-0.33165 0.39120   2
   0  -4  -5-0.44972 0.34932   2
   0   4   6 14.0681 0.85580   2
   0  -4  -6 14.3420 0.82750   2
   0  -4  -7-0.16812 0.33292   2
   0   4   7 0.53290 0.40127   2
   0   4   8 0.32062 0.36486   2
   0  -4  -8-0.02709 0.33439   2
   0  -4   8 0.35289 0.31193   2
   0   4   9-0.38035 0.40312   2
   0  -4  -9 0.01649 0.32171   2
   0  -4   9-0.17805 0.37490   1
   0  -4   9-0.37950 0.34486   2
   0  -4  10 2.19564 0.36167   2
   0   4  10 2.46037 0.41250   2
   0  -4 -10 1.97275 0.33935   2
   0  -4  10 1.68776 0.43111   1
   0  -4  11 0.22381 0.39512   1
   0  -4 -11-0.47710 0.34943   2
   0  -4  11 0.45405 0.33523   2
   0   4  11-0.61037 0.40082   2
   0  -4 -12 16.8237 0.96637   2
   0  -4  12 15.5708 0.97866   1
   0   4  12 17.1012 0.97230   2
   0  -4  12 17.1164 0.95265   2
   0  -4  13 0.52564 0.40964   1
   0  -4  13-0.04253 0.34622   2
   0  -4 -13 0.04796 0.37397   2
   0   4  13 0.39286 0.41263   2
   0  -4  14 82.2080 4.07986   2
   0   4  14 77.2742 4.08756   2
   0  -4 -14 72.1533 4.07225   3
   0  -4  14 75.4739 4.07770   1
   0  -4 -14 86.2216 4.09347   2
   0  -4  15 0.38446 0.48975   1
   0   4  15-0.19531 0.39627   2
   0  -4 -15-0.24734 0.40256   2
   0  -4  15 0.07870 0.37410   2
   0  -4 -16 7.86893 0.57934   2
   0  -4  16 7.59450 0.59994   1
   0   4  16 7.48451 0.58323   2
   0  -4  16 7.13304 0.54173   2
   0  -4  17 0.02592 0.43367   1
   0  -4  17-0.46253 0.36587   2
   0  -4 -17 0.26001 0.42044   2
   0   4  17 0.85951 0.43504   2
   0   4  18 6.55655 0.60910   2
   0  -4  18 6.91389 0.57927   2
   0   4 -18 8.16864 0.60141   2
   0  -4 -18 7.95995 0.61335   2
   0   4 -19-0.19897 0.44700   2
   0  -4 -19-0.02296 0.45995   2
   0   4 -20 2.96375 0.50739   2
   0  -4 -20 3.49115 0.51884   2
   0  -4 -21 0.47925 0.49177   2
   0   4 -21-0.37600 0.46925   2
   0  -4 -21 1.34706 0.70923   1
   0  -4 -22 2.88869 0.73651   1
   0  -4 -22 2.48504 0.55901   2
   0  -4 -23 0.26928 0.53807   2
   0  -4 -23-0.63183 0.73779   1
   0  -4 -24 27.9274 1.60845   2
   0  -4 -25 0.13024 0.61618   2
   0  -4 -26 0.91502 0.66054   2
   0  -4 -27 0.81654 0.65212   2
   0  -4 -28 7.73850 0.83783   2
   0  -4 -29-0.22381 0.72017   2
   0  -4 -30-0.66427 0.72148   2
   0  -4 -31 0.42065 0.76864   2
   0  -4 -32 3.53218 0.81462   2
   0  -4 -33 0.39573 0.81654   2
   0  -5   0 0.47365 0.63709   2
   0   5   1 334.549 16.8319   2
   0  -5  -1 317.716 16.8136   2
   0   5   2-0.09460 0.67468   2
   0  -5  -2-0.05586 0.45834   2
   0  -5  -3 710.083 37.1403   2
   0   5   3 728.029 37.1460   2
   0  -5  -4 0.71961 0.38321   2
   0   5   4 0.26659 0.49061   2
   0   5   5 99.2791 4.86395   2
   0  -5  -5 88.4543 4.85167   2
   0  -5  -6 0.38619 0.37153   2
   0   5   6 0.04749 0.46481   2
   0   5   7 40.9875 2.13056   2
   0  -5  -7 38.8724 2.11724   2
   0   5   8-0.89841 0.43845   2
   0  -5  -8-0.18186 0.35199   2
   0  -5  -9 22.1169 1.20369   2
   0  -5   9 21.3705 1.18301   2
   0   5   9 21.1130 1.21664   2
   0   5  10 0.63641 0.41341   2
   0  -5 -10 0.15371 0.36237   2
   0  -5  10 0.00373 0.34337   2
   0  -5  11 5.70642 0.56818   1
   0   5  11 6.36822 0.55116   2
   0  -5  11 6.83930 0.52414   2
   0  -5 -11 7.00960 0.52402   2
   0  -5 -12-0.27546 0.37376   2
   0   5  12 0.65646 0.39942   2
   0  -5  12 0.56611 0.51191   1
   0  -5  12 0.51518 0.36579   2
   0  -5 -13 4.97031 0.49580   2
   0  -5  13 4.22114 0.52250   1
   0   5  13 5.69188 0.52272   2
   0  -5  13 5.88142 0.46653   2
   0   5  14-0.53871 0.43787   2
   0  -5 -14-0.73191 0.39875   2
   0  -5  14-0.14835 0.36098   2
   0  -5  14 0.61478 0.45271   1
   0  -5  15 20.0672 1.25561   1
   0  -5  15 22.4199 1.22947   2
   0   5  15 22.7871 1.25967   2
   0  -5 -15 23.1731 1.25117   2
   0  -5  16 0.92409 0.37965   2
   0  -5 -16 0.05365 0.42161   2
   0   5  16 0.33960 0.43137   2
   0  -5  16 0.38344 0.45241   1
   0  -5 -16-0.01023 0.44999   3
   0   5  17 3.13240 0.47889   2
   0  -5  17 4.24735 0.57649   1
   0  -5 -17 3.37026 0.47211   2
   0  -5 -17 2.35168 0.43441   3
   0  -5  17 3.05282 0.42249   2
   0  -5  18-0.50285 0.48379   1
   0  -5 -18-1.07142 0.44827   2
   0  -5 -19 0.11578 0.45257   2
   0  -5  19-0.01452 0.48436   1
   0  -5 -20-0.31589 0.46147   2
   0  -5 -21 14.8144 0.96063   2
   0  -5 -22 0.11960 0.56171   2
   0  -5 -23 10.1992 1.07959   1
   0  -5 -23 13.2815 0.88262   2
   0  -5 -24 1.11131 0.59978   2
   0  -5 -25 14.0510 0.98832   2
   0  -5 -26-1.06630 0.63326   2
   0  -5 -27 0.05587 0.68483   2
   0  -5 -28-0.82273 0.72582   2
   0  -5 -29 1.09994 0.72184   2
   0  -5 -30-0.33975 0.75291   2
   0  -5 -31 9.46804 0.95422   2
   0  -5 -32 2.03902 0.78997   2
   0  -6   0 73.2250 3.89313   2
   0   6   1 0.57300 0.87798   2
   0  -6  -1 0.78271 0.58580   2
   0   6   2 12.7431 0.98398   2
   0  -6  -2 10.9900 0.79283   2
   0   6   3 0.09903 0.66846   2
   0  -6  -3-1.30130 0.47152   2
   0   6   4 158.749 7.83760   2
   0  -6  -4 144.713 7.82011   2
   0  -6  -5 0.12703 0.40498   2
   0   6   5-0.05194 0.52082   2
   0   6   6 3.62664 0.53093   2
   0  -6  -6 3.28407 0.42033   2
   0  -6  -7-0.22394 0.37757   2
   0   6   7 0.22083 0.48718   2
   0   6   8 28.9476 1.56426   2
   0  -6  -8 27.6872 1.54061   2
   0  -6  -9 0.43432 0.38501   2
   0   6   9-0.35402 0.46143   2
   0   6  10 8.22392 0.69037   2
   0  -6  10 10.1381 0.63144   2
   0  -6 -10 9.98890 0.66886   2
   0  -6  11-0.15598 0.36637   2
   0   6  11 0.20856 0.46626   2
   0  -6 -11 0.21268 0.40024   2
   0  -6  12 16.7500 0.92930   2
   0  -6  12 15.4758 0.97659   1
   0   6  12 15.7345 0.97890   2
   0  -6 -12 15.2612 0.94938   2
   0  -6  13 0.18790 0.46309   1
   0   6  13 0.04404 0.46163   2
   0  -6  13-0.27089 0.40271   2
   0  -6 -13 0.38193 0.41498   2
   0  -6  14 2.74802 0.39762   2
   0  -6 -14 2.47084 0.43834   2
   0   6  14 2.48891 0.46854   2
   0  -6  14 2.44643 0.49151   1
   0  -6 -15 0.32960 0.42434   2
   0  -6  15-0.33672 0.36818   2
   0  -6  15-0.40396 0.49041   1
   0   6  15-0.05811 0.42683   2
   0  -6  16 3.50325 0.41829   2
   0   6  16 2.62468 0.48474   2
   0  -6 -16 3.18161 0.47677   2
   0  -6  16 2.35422 0.52547   1
   0  -6 -17-0.72844 0.44825   2
   0   6  17 0.00706 0.44293   2
   0  -6  17 0.16206 0.39770   2
   0  -6  17-0.51416 0.48881   1
   0  -6 -18 19.5807 1.00719   2
   0  -6 -18 14.0854 0.99224   3
   0  -6  18 15.2069 0.99878   1
   0  -6  19-0.63899 0.55476   1
   0  -6 -19-0.56989 0.39569   3
   0  -6 -19 0.47719 0.47127   2
   0  -6  20 5.06481 0.64581   1
   0  -6 -20 7.43821 0.61816   2
   0  -6 -21 0.74861 0.53693   2
   0  -6  21-0.55872 0.57980   1
   0  -6 -22 0.99802 0.53339   2
   0  -6 -23 0.13882 0.58880   2
   0  -6 -24 0.88026 0.61973   2
   0  -6 -25 0.32059 0.64069   2
   0  -6 -26-0.18680 0.61827   2
   0  -6 -27 0.42702 0.64522   2
   0  -6 -28 7.44178 0.83450   2
   0  -6 -29 1.23522 0.70706   2
   0  -6 -30 3.36522 0.82204   2
   0  -6 -31-2.02126 0.82204   2
   0  -6 -32-0.20678 0.80090   2
   0  -7   0-1.15560 0.69362   2
   0  -7  -1 51.3235 2.76355   2
   0  -7  -2-0.24308 0.55153   2
   0   7   2-0.45821 0.87108   2
   0   7   3 13.7772 1.06394   2
   0  -7  -3 11.8941 0.83232   2
   0   7   4 0.22776 0.68336   2
   0  -7  -4 0.40608 0.46090   2
   0   7   5 3.46015 0.64249   2
   0  -7  -5 2.50614 0.48463   2
   0   7   6-0.22170 0.54815   2
   0  -7  -6-0.49844 0.44371   2
   0   7   7 7.23989 0.70274   2
   0  -7  -7 8.11384 0.61094   2
   0   7   8-0.17378 0.53867   2
   0  -7  -8-0.18064 0.37779   2
   0   7   9 2.60861 0.53143   2
   0  -7  -9 2.31114 0.43471   2
   0   7  10-0.46411 0.50552   2
   0  -7 -10-0.26755 0.41214   2
   0  -7 -11 19.7773 1.16285   2
   0  -7  11 20.4601 1.12837   2
   0   7  11 19.4217 1.17747   2
   0  -7 -12-0.28779 0.42995   2
   0  -7  12-0.22845 0.37095   2
   0   7  12-0.26515 0.47194   2
   0   7  13 5.37490 0.57605   2
   0  -7  13 6.29424 0.50057   2
   0  -7  13 5.70995 0.61642   1
   0  -7 -13 5.53648 0.53427   2
   0  -7 -14-0.32009 0.42917   2
   0   7  14-0.21130 0.48390   2
   0  -7  14 0.56213 0.35696   1
   0  -7  14 0.48179 0.43874   2
   0  -7  15 12.2188 0.86903   1
   0   7  15 11.9128 0.86678   2
   0  -7 -15 13.8841 0.83084   2
   0  -7  15 13.3700 0.80796   2
   0  -7  16-0.05736 0.51611   1
   0  -7  16-0.50803 0.37074   2
   0  -7 -16-0.67334 0.45267   2
   0   7  16-0.07807 0.50896   2
   0  -7  17 0.59163 0.53219   1
   0  -7 -17 0.28426 0.45707   2
   0  -7  18-0.29416 0.55819   1
   0  -7 -18-0.08188 0.48243   2
   0  -7 -19 14.1570 0.91866   2
   0  -7  19 13.6162 0.94484   1
   0  -7  20-0.75666 0.58181   1
   0  -7 -20 0.49269 0.54430   2
   0  -7 -21 3.53707 0.56669   2
   0  -7  21 2.18803 0.62578   1
   0  -7  22 1.37019 0.61742   1
   0  -7 -22 0.50547 0.57126   2
   0  -7 -23 13.5824 0.95807   2
   0  -7 -24-0.82132 0.62680   2
   0  -7 -25 0.69284 0.66748   2
   0  -7 -26 0.01148 0.65198   2
   0  -7 -27 6.74916 0.82095   2
   0  -7 -28-0.06047 0.68613   2
   0  -7 -29 3.68157 0.76608   2
   0  -7 -30 0.24776 0.77855   2
   0  -7 -31 1.48909 0.82921   2
   0  -7 -32 0.83361 0.84650   2
   0  -8   0 9.91794 0.91682   2
   0  -8  -1-0.80499 0.63194   2
   0  -8   1-0.77269 0.73645   2
   0   8   2-1.00345 0.98124   2
   0  -8  -2 0.13039 0.55472   2
   0  -8  -3-0.64051 0.54089   2
   0   8   3-0.38777 0.88876   2
   0  -8  -4 1.27559 0.47218   2
   0   8   4 1.10903 0.78049   2
   0   8   5-0.13571 0.71361   2
   0  -8  -5-0.64466 0.44716   2
   0  -8  -6 22.5354 1.31477   2
   0   8   6 24.0089 1.38980   2
   0   8   7 0.43498 0.58882   2
   0  -8  -7 0.50664 0.42149   2
   0  -8  -8 92.1476 4.66422   2
   0   8   8 85.4236 4.67219   2
   0   8   9-0.24445 0.56600   2
   0  -8  -9-0.53424 0.44355   2
   0  -8 -10 7.42286 0.64896   2
   0   8  10 7.63108 0.69676   2
   0  -8 -11 0.36337 0.42304   2
   0   8  11-0.16063 0.52316   2
   0  -8 -12 2.69596 0.46977   2
   0  -8  12 2.66472 0.41969   2
   0   8  12 1.87900 0.52556   2
   0  -8  13-0.05369 0.39568   2
   0  -8 -13-0.70279 0.43335   2
   0   8  13-0.57006 0.51351   2
   0  -8  14 1.28444 0.55746   1
   0  -8 -14 1.87479 0.45519   2
   0  -8  14 2.14578 0.40070   2
   0   8  14 1.73415 0.52823   2
   0   8  15-0.03094 0.50014   2
   0  -8 -15-0.23595 0.45554   2
   0  -8  15-0.22288 0.45093   1
   0  -8  15-0.43816 0.44689   2
   0  -8  16 2.23108 0.45138   2
   0  -8 -16 2.10567 0.49083   2
   0  -8  16 4.06460 0.71400   1
   0   8  16 1.51783 0.52773   2
   0  -8  17-0.25368 0.55883   1
   0  -8 -17 0.08980 0.46498   2
   0  -8 -18-0.26376 0.48584   2
   0  -8  18 0.15017 0.58902   1
   0  -8 -19 0.03599 0.51682   2
   0  -8  19-0.03636 0.59840   1
   0  -8  20 1.23779 0.64307   1
   0  -8 -20 1.02663 0.57424   2
   0  -8 -21-0.13612 0.57102   2
   0  -8  21-0.33293 0.60683   1
   0  -8 -22 10.1987 0.80469   2
   0  -8  22 8.38744 0.87322   1
   0  -8 -23-0.63774 0.59863   2
   0  -8 -24-0.53492 0.63314   2
   0  -8 -25 0.38844 0.62737   2
   0  -8 -26 5.61928 0.77321   2
   0  -8 -27 1.05037 0.70685   2
   0  -8 -28-0.54505 0.70525   2
   0  -8 -29 0.37603 0.73632   2
   0  -8 -30 1.08111 0.79278   2
   0  -8 -31-0.19168 0.78739   2
   0  -9   0-0.44711 0.70614   2
   0  -9   1 16.1314 1.24906   2
   0  -9  -1 17.7290 1.15857   2
   0  -9  -2-0.63227 0.60151   2
   0  -9  -3 66.1450 3.55161   2
   0   9   3 69.3926 3.67025   2
   0  -9  -4 0.14890 0.51009   2
   0   9   4-1.13653 0.89181   2
   0   9   5 11.2439 1.00966   2
   0  -9  -5 10.3056 0.75758   2
   0   9   6 0.37196 0.69138   2
   0  -9  -6-0.32885 0.48782   2
   0   9   7 7.05999 0.75165   2
   0  -9  -7 6.43775 0.59654   2
   0   9   8-0.44713 0.62108   2
   0  -9  -8 0.21086 0.46929   2
   0   9   9 25.2404 1.55229   2
   0  -9  -9 28.1345 1.51739   2
   0   9  10 0.71700 0.59295   2
   0  -9 -10 0.44531 0.44370   2
   0  -9 -11 5.14564 0.55484   2
   0   9  11 4.44438 0.63414   2
   0   9  12-0.15797 0.55111   2
   0  -9 -12-0.57569 0.46936   2
   0  -9  13 7.64435 0.56674   2
   0   9  13 5.44192 0.68667   2
   0  -9 -13 7.55279 0.63415   2
   0  -9 -14 0.73247 0.47590   2
   0   9  14-0.32324 0.55012   2
   0  -9  14-0.11869 0.41395   2
   0   9  15 0.06895 0.54672   2
   0  -9  15-0.91258 0.59326   1
   0  -9  15-0.31802 0.42725   2
   0  -9 -15-0.13822 0.48188   2
   0  -9 -16 0.00858 0.49077   2
   0  -9  16-0.00556 0.53163   1
   0  -9  17 0.43670 0.76384   1
   0  -9 -17 0.75931 0.51151   2
   0  -9  18 0.14009 0.63581   1
   0  -9 -18-0.00891 0.50757   2
   0  -9  19 15.1510 1.10507   1
   0  -9 -19 16.9161 1.04668   2
   0  -9 -20-0.64706 0.55157   2
   0  -9  20 0.52546 0.66871   1
   0  -9 -21 2.46616 0.60541   2
   0  -9  21 2.95616 0.69917   1
   0  -9  22-0.07382 0.67540   1
   0  -9 -22 0.18793 0.60981   2
   0  -9 -23 0.54236 0.62029   2
   0  -9 -24-0.50903 0.61427   2
   0  -9 -25 0.27696 0.67286   2
   0  -9 -26-0.40209 0.68861   2
   0  -9 -27 5.99769 0.81810   2
   0  -9 -28 0.09255 0.76357   2
   0  -9 -29 0.18858 0.76733   2
   0  -9 -30 0.51113 0.78241   2
   0  -9 -31 1.18424 0.82281   2
   0 -10   0 75.5266 4.03837   2
   0 -10  -1-0.38643 0.63026   2
   0 -10   1 1.46393 0.78166   2
   0 -10  -2 1.70539 0.60339   2
   0  10   3-1.29773 1.09385   2
   0 -10  -3 0.61128 0.60791   2
   0  10   4 94.6921 4.98247   2
   0 -10  -4 92.1929 4.88792   2
   0  10   5 0.50212 0.90295   2
   0 -10  -5 0.22137 0.50694   2
   0  10   6 17.7753 1.32104   2
   0 -10  -6 19.6043 1.15114   2
   0  10   7-0.06098 0.74647   2
   0 -10  -7-0.03824 0.51284   2
   0 -10  -8 8.97146 0.70216   2
   0  10   8 9.43099 0.87226   2
   0 -10  -9 0.72432 0.48637   2
   0  10   9-0.80241 0.66476   2
   0  10  10 27.7323 1.65601   2
   0 -10 -10 29.1080 1.59985   2
   0 -10 -11-0.63573 0.48263   2
   0  10  11 0.34295 0.60863   2
   0 -10 -12 2.83137 0.51123   2
   0  10  12 2.70061 0.63965   2
   0  10  13-0.60489 0.60152   2
   0 -10 -13 0.28502 0.50196   2
   0 -10  14 12.2106 0.78062   2
   0 -10 -14 12.7794 0.83648   2
   0  10  14 9.83255 0.88663   2
   0 -10 -15-0.44663 0.50345   2
   0 -10  16 0.62192 0.67873   1
   0 -10 -16 1.18661 0.53055   2
   0 -10  17-1.20516 0.55592   1
   0 -10 -17 0.08454 0.53017   2
   0 -10  18-0.01532 0.75100   1
   0 -10 -18-0.41831 0.57338   2
   0 -10 -19 0.41681 0.59005   2
   0 -10  19 0.21674 0.70460   1
   0 -10 -20 16.2278 1.01107   2
   0 -10  20 12.6981 1.08250   1
   0 -10  21 0.47478 0.78550   1
   0 -10 -21 0.31137 0.60528   2
   0 -10 -22 0.81519 0.63130   2
   0 -10 -23 1.18053 0.65890   2
   0 -10 -24 2.68069 0.67048   2
   0 -10 -25 0.62811 0.69568   2
   0 -10 -26 2.47718 0.72264   2
   0 -10 -27 0.49177 0.72444   2
   0 -10 -28 0.10522 0.77682   2
   0 -10 -29 0.96360 0.82689   2
   0 -10 -30 1.19028 0.83086   2
   0 -11   0-0.26075 0.78873   2
   0 -11   1 40.9317 2.37070   2
   0 -11  -1 42.0671 2.31655   2
   0 -11  -2 0.67024 0.65401   2
   0 -11   2 2.01992 0.93105   2
   0 -11  -3 8.61999 0.78621   2
   0  11   4 0.54347 1.03512   2
   0 -11  -4-1.07750 0.55086   2
   0  11   5 18.5564 1.40077   2
   0 -11  -5 16.6344 1.09588   2
   0  11   6 0.23144 0.89998   2
   0 -11  -6-0.01713 0.55954   2
   0 -11  -7 11.3852 0.80749   2
   0  11   7 9.77036 1.01975   2
   0  11   8 1.23776 0.77306   2
   0 -11  -8 0.15297 0.51708   2
   0  11   9 1.05552 0.72092   2
   0 -11  -9 0.51714 0.53312   2
   0 -11 -10-0.38849 0.51722   2
   0  11  10 1.16230 0.70130   2
   0  11  11 4.73616 0.73869   2
   0 -11 -11 5.87863 0.59459   2
   0 -11 -12 0.12789 0.50163   2
   0  11  12-0.43310 0.66183   2
   0 -11 -13 1.86157 0.55459   2
   0 -11 -14 0.30201 0.52309   2
   0 -11 -15 0.63613 0.56886   2
   0 -11 -16 0.33488 0.56080   2
   0 -11 -17 1.57483 0.55966   2
   0 -11  17 1.48990 0.76306   1
   0 -11 -18 0.55145 0.58504   2
   0 -11  18 0.14053 0.57141   1
   0 -11 -19 1.49804 0.62026   2
   0 -11  19 0.15351 0.96663   1
   0 -11 -20-0.59771 0.61675   2
   0 -11  20 1.15843 0.77866   1
   0 -11 -21-0.24207 0.62928   2
   0 -11  21 0.97355 0.80059   1
   0 -11 -22 0.54785 0.63246   2
   0 -11 -23 5.41028 0.75282   2
   0 -11 -24-0.69739 0.70843   2
   0 -11 -25 0.22555 0.69252   2
   0 -11 -26 0.08864 0.69353   2
   0 -11 -27 0.70637 0.74011   2
   0 -11 -28 0.22815 0.76652   2
   0 -11 -29 2.36073 0.82843   2
   0 -11 -30 0.01480 0.83560   2
   0 -12   0 64.0773 3.48685   2
   0 -12   1-0.01374 0.82391   2
   0 -12  -1-0.70069 0.69706   2
   0 -12   2 16.6377 1.31048   2
   0 -12  -2 16.4021 1.13921   2
   0 -12  -3 1.32853 0.61312   2
   0  12   4 3.94297 1.14720   2
   0 -12  -4 4.50697 0.67086   2
   0  12   5-1.03259 1.06737   2
   0 -12  -5-1.01717 0.57286   2
   0 -12  -6 49.0586 2.66650   2
   0  12   6 49.8397 2.82234   2
   0  12   7 1.61538 0.96931   2
   0 -12  -7 0.74434 0.56159   2
   0 -12  -8 15.5576 1.01288   2
   0  12   8 14.9656 1.22110   2
   0 -12  -9-0.19704 0.51397   2
   0  12   9-1.16665 0.81262   2
   0  12  10 1.68811 0.77604   2
   0 -12 -10 2.09538 0.56796   2
   0  12  11 0.67776 0.74391   2
   0 -12 -11-0.17610 0.53770   2
   0 -12 -12 7.00816 0.68076   2
   0 -12 -13 0.43546 0.56313   2
   0 -12 -14 1.20486 0.55202   2
   0 -12 -15 0.00996 0.56285   2
   0 -12 -16 2.13961 0.60510   2
   0 -12  17-0.26465 0.79404   1
   0 -12 -17 0.56861 0.60659   2
   0 -12 -18 3.14192 0.64715   2
   0 -12  18 3.09764 0.84427   1
   0 -12  19 0.50636 0.71980   1
   0 -12 -19 0.60183 0.63616   2
   0 -12 -20 3.52219 0.66736   2
   0 -12  20 2.26707 0.97781   1
   0 -12 -21-0.02258 0.63118   2
   0 -12 -22 0.57633 0.68081   2
   0 -12 -23-0.77944 0.67220   2
   0 -12 -24 2.22702 0.71108   2
   0 -12 -25 0.69366 0.72922   2
   0 -12 -26 1.85774 0.76554   2
   0 -12 -27-0.61999 0.75683   2
   0 -12 -28 0.01390 0.77178   2
   0 -12 -29 0.74019 0.79622   2
   0 -13   0-0.10998 0.81543   2
   0 -13   1 13.1973 1.18338   2
   0 -13  -1 16.1929 1.12632   2
   0 -13   2 0.23445 0.91247   2
   0 -13  -2 1.58646 0.68771   2
   0 -13  -3 47.8796 2.54956   2
   0 -13   3 43.9429 2.67595   2
   0 -13  -4-0.29800 0.60829   2
   0  13   5 14.9547 1.45473   2
   0 -13  -5 16.1132 1.06023   2
   0  13   6 0.30018 1.09573   2
   0 -13  -6 0.28163 0.59369   2
   0 -13  -7 2.21356 0.59573   2
   0  13   7 2.96350 1.02575   2
   0  13   8-0.09285 0.97633   2
   0 -13  -8-0.14753 0.57555   2
   0  13   9 5.02463 0.96606   2
   0 -13  -9 4.86064 0.64031   2
   0 -13 -10-0.35811 0.57337   2
   0 -13 -11 0.48507 0.58387   2
   0 -13 -12-0.57051 0.57838   2
   0 -13 -13 3.78964 0.63706   2
   0 -13 -14-0.09364 0.57580   2
   0 -13 -15 0.30709 0.58923   2
   0 -13 -16 0.41724 0.62743   2
   0 -13 -17 7.52659 0.77864   2
   0 -13  18 0.17524 0.89504   1
   0 -13 -18 1.61631 0.66600   2
   0 -13  19 1.09279 0.89975   1
   0 -13 -19 1.50862 0.65075   2
   0 -13 -20 1.32584 0.67001   2
   0 -13  20-0.58289 0.89385   1
   0 -13 -21-0.71877 0.68382   2
   0 -13 -22 0.76268 0.70673   2
   0 -13 -23 2.74467 0.72911   2
   0 -13 -24 1.36839 0.72501   2
   0 -13 -25 4.49496 0.80049   2
   0 -13 -26-0.08237 0.76972   2
   0 -13 -27 2.96950 0.81237   2
   0 -13 -28-0.35772 0.80007   2
   0 -13 -29-0.60365 0.84481   2
   0 -14   0-0.38821 0.86709   2
   0 -14   1-0.53338 0.85582   2
   0 -14  -1 0.44531 0.73883   2
   0 -14   2 0.94320 0.87961   2
   0 -14  -2 1.52950 0.72034   2
   0 -14   3 0.94243 0.98225   2
   0 -14  -3-0.52119 0.68448   2
   0 -14  -4 1.09211 0.64064   2
   0 -14  -5-0.02168 0.63769   2
   0  14   5 0.23419 1.22367   2
   0 -14  -6 1.69655 0.63872   2
   0  14   6 3.59229 1.19685   2
   0 -14  -7 0.55783 0.60767   2
   0 -14  -8 0.78928 0.58928   2
   0 -14  -9 0.28755 0.60084   2
   0 -14 -10 31.3235 1.78713   2
   0 -14 -11-0.30960 0.61724   2
   0 -14 -12-1.01678 0.60853   2
   0 -14 -13 0.83011 0.61738   2
   0 -14 -14 0.15230 0.66775   2
   0 -14 -15-1.80791 0.65706   2
   0 -14 -16 1.34133 0.64496   2
   0 -14 -17 1.00428 0.69374   2
   0 -14 -18 0.68186 0.66828   2
   0 -14 -19 0.71110 0.67098   2
   0 -14  19 0.35058 0.97561   1
   0 -14 -20 0.92008 0.70302   2
   0 -14 -21 0.09128 0.72645   2
   0 -14 -22-0.11315 0.71464   2
   0 -14 -23 0.70052 0.72109   2
   0 -14 -24-1.02717 0.73755   2
   0 -14 -25 0.35724 0.76471   2
   0 -14 -26 1.30804 0.76214   2
   0 -14 -27-0.49526 0.83067   2
   0 -14 -28 2.68028 0.89607   2
   0 -15   0-0.25138 0.84105   2
   0 -15  -1 7.91149 0.89609   2
   0 -15   1 7.69335 1.03777   2
   0 -15  -2 0.51819 0.73468   2
   0 -15   2 0.45660 0.92692   2
   0 -15  -3 21.3162 1.33691   2
   0 -15   3 18.7559 1.51125   2
   0 -15   4 0.38686 1.10898   2
   0 -15  -4 0.73107 0.67654   2
   0 -15  -5 0.71725 0.67345   2
   0 -15  -6 0.03465 0.64411   2
   0 -15  -7 11.1446 0.89840   2
   0 -15  -8 0.60656 0.61424   2
   0 -15  -9 0.60315 0.66620   2
   0 -15 -10 0.22062 0.61132   2
   0 -15 -11 15.9342 1.09841   2
   0 -15 -12-0.11649 0.67848   2
   0 -15 -13 1.13543 0.65740   2
   0 -15 -14 0.54908 0.69948   2
   0 -15 -15 0.10642 0.66063   2
   0 -15 -16 1.45429 0.69134   2
   0 -15 -17 2.20894 0.70698   2
   0 -15 -18-0.40887 0.73944   2
   0 -15 -19 0.95294 0.71969   2
   0 -15 -20-1.47453 0.74776   2
   0 -15 -21 4.85410 0.80450   2
   0 -15 -22-0.19057 0.75622   2
   0 -15 -23 0.58792 0.75227   2
   0 -15 -24-0.78063 0.77753   2
   0 -15 -25-0.44974 0.76999   2
   0 -15 -26-0.73885 0.84818   2
   0 -15 -27 1.27207 0.85315   2
   0 -16   0 0.63613 0.87038   2
   0 -16   1 0.41664 0.88421   2
   0 -16  -1-0.40490 0.78572   2
   0 -16  -2 0.49382 0.76630   2
   0 -16   2-0.07081 0.97997   2
   0 -16  -3 0.76618 0.72978   2
   0 -16   3-0.89598 1.01264   2
   0 -16  -4 0.19882 0.69909   2
   0 -16   4-0.96741 1.03669   2
   0 -16  -5-0.92311 0.70228   2
   0 -16  -6 0.68682 0.68069   2
   0 -16  -7-1.03482 0.67127   2
   0 -16  -8 3.57126 0.69968   2
   0 -16  -9 0.66866 0.69198   2
   0 -16 -10 5.82332 0.76203   2
   0 -16 -11 1.29705 0.70042   2
   0 -16 -12 1.32173 0.74105   2
   0 -16 -13 0.82413 0.65990   2
   0 -16 -14 0.40397 0.71813   2
   0 -16 -15 0.12830 0.70335   2
   0 -16 -16-0.40003 0.69302   2
   0 -16 -17-0.19170 0.72825   2
   0 -16 -18 1.73497 0.72677   2
   0 -16 -19-0.71604 0.71827   2
   0 -16 -20 1.08156 0.73655   2
   0 -16 -21-0.10823 0.74031   2
   0 -16 -22 0.22912 0.79280   2
   0 -16 -23 0.92020 0.79906   2
   0 -16 -24 0.21388 0.75913   2
   0 -16 -25-0.14849 0.83634   2
   0 -16 -26-0.26942 0.81909   2
   0 -17   0-0.89292 0.86824   2
   0 -17  -1 1.85574 0.84623   2
   0 -17   1 1.45967 0.95253   2
   0 -17   2 0.52819 0.98302   2
   0 -17  -2 0.54314 0.80188   2
   0 -17  -3-0.51295 0.72908   2
   0 -17   3 0.32731 1.06324   2
   0 -17  -4 0.85735 0.72632   2
   0 -17   4-0.30598 1.10120   2
   0 -17   5 7.38570 1.24728   2
   0 -17  -5 8.88405 0.89403   2
   0 -17  -6 1.45453 0.75383   2
   0 -17  -7 6.72617 0.86426   2
   0 -17  -8-0.03823 0.71456   2
   0 -17  -9 0.93242 0.72438   2
   0 -17 -10-0.37133 0.70426   2
   0 -17 -11 7.64477 0.86510   2
   0 -17 -12-0.17203 0.75550   2
   0 -17 -13 1.36635 0.74173   2
   0 -17 -14 0.79666 0.69421   2
   0 -17 -15-0.85544 0.78118   2
   0 -17 -16 0.64280 0.74069   2
   0 -17 -17 0.42968 0.73573   2
   0 -17 -18-0.54471 0.73950   2
   0 -17 -19-0.72553 0.77008   2
   0 -17 -20 0.44576 0.76029   2
   0 -17 -21 0.49291 0.76840   2
   0 -17 -22-0.19060 0.81499   2
   0 -17 -23-0.99679 0.87990   2
   0 -17 -24 0.01473 0.80171   2
   0 -17 -25 1.46840 0.86427   2
   0 -18   0 8.90350 1.06548   2
   0 -18  -1 1.15708 0.85694   2
   0 -18   1-0.56380 0.95218   2
   0 -18   2-0.74374 1.08135   2
   0 -18  -2 0.06007 0.83686   2
   0 -18  -3 0.12776 0.80175   2
   0 -18   3 0.08008 1.13989   2
   0 -18   4 0.87511 1.12500   2
   0 -18  -4 2.06396 0.79258   2
   0 -18  -5 1.18605 0.76275   2
   0 -18   5-0.19980 1.23467   2
   0 -18  -6 1.85193 0.81439   2
   0 -18   6 2.13780 1.24806   2
   0 -18  -7 0.27345 0.81784   2
   0 -18  -8 0.86195 0.79401   2
   0 -18  -9 0.07974 0.74923   2
   0 -18 -10 1.16741 0.75570   2
   0 -18 -11 0.14518 0.75212   2
   0 -18 -12 0.27459 0.75898   2
   0 -18 -13-0.40759 0.75555   2
   0 -18 -14 0.54334 0.71350   2
   0 -18 -15 0.01403 0.76753   2
   0 -18 -16-0.39222 0.77942   2
   0 -18 -17-0.22140 0.77070   2
   0 -18 -18 2.66935 0.81826   2
   0 -18 -19-1.10141 0.84576   2
   0 -18 -20 1.58487 0.84783   2
   0 -18 -21-0.76649 0.82841   2
   0 -18 -22-0.34262 0.78879   2
   0 -18 -23 2.45681 0.86665   2
   0 -18 -24 0.82251 0.83372   2
   0 -19   0 0.68603 0.92056   2
   0 -19  -1 7.33663 0.97065   2
   0 -19   1 3.59008 1.04049   2
   0 -19   2 0.82701 1.06936   2
   0 -19  -2 1.57231 0.92214   2
   0 -19  -3 1.73191 0.87518   2
   0 -19   3 1.69871 1.14326   2
   0 -19   4-0.57848 1.10376   2
   0 -19  -4 0.01449 0.80781   2
   0 -19  -5 1.10847 0.81251   2
   0 -19   5-0.22416 1.24470   2
   0 -19  -6-0.40339 0.76692   2
   0 -19   6 3.12066 1.35708   2
   0 -19  -7 4.53044 0.86693   2
   0 -19   7 3.35995 1.36968   2
   0 -19  -8-0.26896 0.78478   2
   0 -19  -9-0.11169 0.78071   2
   0 -19 -10-0.90439 0.75195   2
   0 -19 -11 1.25854 0.76031   2
   0 -19 -12-0.63265 0.80918   2
   0 -19 -13 0.24504 0.79687   2
   0 -19 -14-1.17167 0.76169   2
   0 -19 -15 0.34534 0.78436   2
   0 -19 -16 0.49284 0.80910   2
   0 -19 -17-0.75408 0.79317   2
   0 -19 -18 0.38540 0.80985   2
   0 -19 -19 0.03057 0.81818   2
   0 -19 -20 1.25493 0.82615   2
   0 -19 -21 2.11354 0.86691   2
   0 -19 -22-0.30897 0.85135   2
   0 -20   0 0.56092 0.92681   2
   0 -20  -1-0.60980 0.96364   2
   0 -20   1-0.31824 1.01798   2
   0 -20  -2 1.20828 0.86280   2
   0 -20   2 1.43265 1.05036   2
   0 -20  -3-0.68185 0.84600   2
   0 -20   3 0.67143 1.12826   2
   0 -20   4 1.00128 1.14563   2
   0 -20  -4 1.21647 0.83068   2
   0 -20   5 0.20620 1.24325   2
   0 -20  -5 0.36861 0.79791   2
   0 -20  -6-0.42411 0.79894   2
   0 -20   6-1.46630 1.23769   2
   0 -20  -7 0.66044 0.81769   2
   0 -20   7-0.37859 1.31368   2
   0 -20  -8-0.14852 0.83822   2
   0 -20   8 0.82507 1.37935   2
   0 -20  -9 0.05853 0.79468   2
   0 -20 -10 6.33381 0.92297   2
   0 -20 -11 0.56423 0.79305   2
   0 -20 -12 0.80719 0.82793   2
   0 -20 -13 0.01529 0.84037   2
   0 -20 -14 2.77531 0.80682   2
   0 -20 -15 0.84856 0.81188   2
   0 -20 -16-1.17062 0.87368   2
   0 -20 -17 1.04374 0.81637   2
   0 -20 -18 1.99097 0.83137   2
   0 -20 -19 0.60884 0.84473   2
   0 -20 -20-1.80947 0.90854   2
   0 -20 -21-0.60543 0.87286   2
   0 -21   0-1.24337 0.95169   2
   0 -21   1-0.03793 0.99845   2
   0 -21  -1 1.88689 0.92824   2
   0 -21   2 1.74953 1.09106   2
   0 -21  -2-0.24889 0.90731   2
   0 -21   3 0.81247 1.17325   2
   0 -21  -3 1.56488 0.88144   2
   0 -21  -4-0.01592 0.84036   2
   0 -21   4-1.26749 1.19825   2
   0 -21  -5-0.09615 0.88233   2
   0 -21   5-1.58008 1.26264   2
   0 -21  -6-0.28466 0.81305   2
   0 -21   6 0.97796 1.28009   2
   0 -21   7-0.90147 1.31103   2
   0 -21  -7 0.11010 0.85679   2
   0 -21  -8-0.23250 0.82531   2
   0 -21   8 0.77498 1.39191   2
   0 -21  -9 2.20393 0.86007   2
   0 -21   9 3.18775 1.48445   2
   0 -21 -10-0.43399 0.85910   2
   0 -21 -11 4.34991 0.87781   2
   0 -21 -12-0.07796 0.84230   2
   0 -21 -13 1.48178 0.86965   2
   0 -21 -14-0.09104 0.81669   2
   0 -21 -15-0.01526 0.82133   2
   0 -21 -16-1.30551 0.88100   2
   0 -21 -17-1.07981 0.88880   2
   0 -21 -18-0.14319 0.83454   2
   0 -21 -19-0.45286 0.86511   2
   0 -22   0 0.48360 0.98041   2
   0 -22   1-0.25093 1.00527   2
   0 -22  -1 0.43181 0.95686   2
   0 -22  -2 0.89423 0.91663   2
   0 -22   2-0.65535 1.04474   2
   0 -22   3 0.81571 1.07628   2
   0 -22  -3-1.32656 0.90723   2
   0 -22  -4-0.59946 0.90691   2
   0 -22   4-0.98214 1.21784   2
   0 -22  -5-0.15010 0.89751   2
   0 -22   5-1.12611 1.26390   2
   0 -22  -6 0.90386 0.88072   2
   0 -22   6 0.42249 1.27306   2
   0 -22   7-1.61397 1.37405   2
   0 -22  -7-0.60547 0.89971   2
   0 -22   8 0.51671 1.38419   2
   0 -22  -8 1.21521 0.89826   2
   0 -22   9 0.25420 1.43588   2
   0 -22  -9-0.65501 0.86655   2
   0 -22  10-1.34365 1.54162   2
   0 -22 -10-1.47737 0.86756   2
   0 -22 -11 1.73223 0.85767   2
   0 -22 -12 0.38962 0.86068   2
   0 -22 -13 0.76290 0.88972   2
   0 -22 -14-0.23659 0.82582   2
   0 -22 -15 0.53915 0.86113   2
   0 -22 -16-1.94879 0.94116   2
   0 -22 -17 0.28314 0.89440   2
   0 -23   0 0.38231 0.98900   2
   0 -23   1-0.96861 1.02119   2
   0 -23  -1-1.33988 0.95631   2
   0 -23  -2 0.14204 0.93576   2
   0 -23   2-0.12508 1.10457   2
   0 -23   3-0.84775 1.15787   2
   0 -23  -3-0.32983 0.93584   2
   0 -23   4-2.09208 1.17919   2
   0 -23  -4 0.33182 0.91364   2
   0 -23  -5 0.03447 0.92190   2
   0 -23   5-3.39049 1.32298   2
   0 -23   6 0.50329 1.28447   2
   0 -23  -6-0.05144 0.90349   2
   0 -23   7 2.46482 1.41282   2
   0 -23  -7 1.10144 0.89307   2
   0 -23  -8-0.53348 0.89394   2
   0 -23   8 2.27555 1.44224   2
   0 -23   9-0.94659 1.46836   2
   0 -23  -9 0.51490 0.87880   2
   0 -23 -10 1.50576 0.90070   2
   0 -23  10 1.07340 1.51752   2
   0 -23 -11 0.50809 0.87954   2
   0 -23  11 3.11175 1.62708   2
   0 -23 -12-0.28701 0.87642   2
   0 -23 -13 1.10239 0.89721   2
   0 -23 -14 0.40946 0.88530   2
   0 -23 -15 0.30991 0.87567   2
   0 -24   0 3.17676 1.05810   2
   0 -24   1-0.24386 1.07347   2
   0 -24  -1 1.15980 0.98338   2
   0 -24  -2 1.46998 0.97493   2
   0 -24   2 2.49455 1.14757   2
   0 -24  -3-1.37379 0.98022   2
   0 -24   3 0.37619 1.15148   2
   0 -24  -4-0.82195 0.95955   2
   0 -24   4 0.20832 1.22372   2
   0 -24   5-0.50478 1.25186   2
   0 -24  -5 0.23318 0.93112   2
   0 -24   6 1.20147 1.32705   2
   0 -24  -6 0.76622 0.91849   2
   0 -24   7 2.90717 1.41129   2
   0 -24  -7 0.94486 0.93081   2
   0 -24  -8 1.67607 0.94117   2
   0 -24   8-0.89114 1.48060   2
   0 -24  -9 0.65682 0.91584   2
   0 -24   9-2.07712 1.55069   2
   0 -24 -10 0.75707 0.93674   2
   0 -24  10 0.24166 1.57371   2
   0 -24 -11-0.35743 0.89494   2
   0 -24  11 0.88029 1.65961   2
   0 -24  12-0.19643 1.66720   2
   0 -24 -12 0.26294 0.92913   2
   0 -24  13 2.04467 1.78267   2
   0 -24 -13-0.10723 0.93134   2
   0 -25   0 0.21641 1.04166   2
   0 -25   1 0.79066 1.12921   2
   0 -25  -1-0.83622 1.03271   2
   0 -25   2 1.19659 1.09210   2
   0 -25  -2-0.83013 1.01136   2
   0 -25  -3-3.29236 1.02250   2
   0 -25   3-3.05475 1.23358   2
   0 -25  -4-1.41889 1.01616   2
   0 -25   4 3.07235 1.24862   2
   0 -25  -5 1.45201 1.01750   2
   0 -25   5 0.16929 1.27197   2
   0 -25   6-0.87874 1.40592   2
   0 -25  -6 2.82010 0.96097   2
   0 -25   7 0.08158 1.42990   2
   0 -25  -7 0.25424 0.95446   2
   0 -25   8-1.23043 1.49145   2
   0 -25  -8-2.20972 0.99351   2
   0 -25   9-1.63736 1.57276   2
   0 -25  -9 0.16287 0.95996   2
   0 -26   0-0.40514 1.07917   2
   0 -26   1-2.93685 1.19029   2
   0 -26  -1 0.97340 1.09077   2
   0 -26   2-0.28396 1.14793   2
   0 -26  -2-0.23400 1.00651   2
   0 -26  -3 0.01964 1.07820   2
   0 -26   3-0.65030 1.15170   2
   1   0   1 271.776 10.1729   3
   1   0  -1 150.407 10.1668   1
   1   0  -2 0.50091 0.15971   1
  -1   0   2 0.70155 0.18816   1
  -1   0  -2 0.59273 0.07659   2
  -1   0  -3 75.6919 3.78313   2
   1   0  -3 71.0219 3.79469   1
  -1   0   3 71.2730 3.78310   2
   1   0  -4-0.55983 0.28832   1
  -1   0   4-0.10965 0.17714   2
  -1   0  -4-0.09776 0.15840   2
  -1   0   5 240.307 12.4088   2
  -1   0  -5 248.834 12.4089   2
   1   0   5 213.561 12.4230   3
   1   0  -5 245.189 12.4191   1
   1   0   6 0.60878 0.48765   3
  -1   0   6 0.26113 0.24206   2
  -1   0  -6-0.39579 0.22525   2
  -1   0  -7 80.8804 3.99775   2
  -1   0   7 76.3756 3.99844   2
   1   0   7 70.4712 4.01411   3
   1   0  -7 77.5145 4.01484   1
   1   0   8-0.53558 0.38870   3
  -1   0   8-0.20889 0.29456   2
   1   0  -8-0.16577 0.41747   1
  -1   0  -8 0.55030 0.26261   2
  -1   0  -9 17.1341 0.88890   2
  -1   0   9 14.1914 0.89655   2
   1   0   9 15.4146 0.94627   3
   1   0  -9 17.6194 0.95790   1
   1   0 -10 0.47352 0.42115   1
   1   0  10-0.92673 0.46576   3
  -1   0  10-0.17233 0.30789   2
  -1   0 -10-0.15611 0.29392   2
   1   0  11 36.5540 2.08885   3
   1   0 -11 38.2242 2.08813   1
  -1   0 -11 41.1738 2.06661   2
  -1   0  11 39.3641 2.06841   2
   1   0 -12 0.01324 0.42224   1
  -1   0 -12 0.00834 0.32479   2
   1   0  12 0.69139 0.44551   3
  -1   0  12-0.33495 0.32976   2
   1   0  13 1.25343 0.42565   3
  -1   0 -13 0.08093 0.35002   2
   1   0 -13 1.37646 0.45734   1
  -1   0  13 0.99874 0.36364   2
   1   0  14-0.13113 0.39734   3
   1   0 -14-0.13426 0.46391   1
  -1   0  14 0.26232 0.34382   2
  -1   0 -14-0.20292 0.34223   2
  -1   0 -15 4.06817 0.39291   1
  -1   0 -15 6.10399 0.47165   2
  -1   0  15 5.08997 0.45057   2
   1   0 -15 4.75524 0.53194   1
  -1   0 -16 0.02207 0.37464   2
  -1   0 -16-0.24952 0.28672   1
  -1   0  16 0.14379 0.37626   2
   1   0 -16-0.05336 0.48809   1
   1   0 -17 0.60277 0.49509   1
  -1   0 -17 0.91900 0.28484   1
  -1   0  17 0.11540 0.37798   2
  -1   0 -17 1.02535 0.37965   2
  -1   0  18-0.41144 0.38276   2
  -1   0 -18 0.66672 0.28092   1
  -1   0 -18-0.16537 0.40640   2
   1   0 -18-0.17543 0.49734   1
  -1   0 -19 0.98796 0.42009   2
  -1   0 -19 0.76720 0.31450   1
  -1   0  19 0.28877 0.40336   2
   1   0 -19 1.90710 0.54579   1
   1   0 -20-0.22361 0.53191   1
  -1   0 -20-0.24289 0.28100   1
  -1   0 -20-0.74701 0.46430   2
  -1   0 -21 5.06430 0.56961   2
   1   0 -21 6.40456 0.64875   1
   1   0 -22 0.65382 0.59425   1
  -1   0 -22 0.46867 0.49991   2
  -1   0 -23 11.5752 0.83623   2
   1   0 -23 11.5348 0.85767   1
  -1   0 -24 1.02996 0.60048   2
  -1   0 -25 20.8112 1.27781   2
  -1   0 -26-0.46585 0.65033   2
  -1   0 -27 3.22380 0.73384   2
  -1   0 -28 0.84581 0.81883   2
  -1   0 -29 11.3844 0.97762   2
  -1   0 -30-0.08485 0.74515   2
  -1   0 -31 6.51443 0.85164   2
  -1   0 -32-0.50636 0.77024   2
  -1   0 -33-0.09347 0.79727   2
  -1  -1   1 25.8354 4.03443   1
   1   1  -1 213.666 4.04718   1
  -1  -1  -2 264.510 11.2882   2
   1   1  -2 231.883 11.2924   1
  -1  -1  -3 26.5769 1.29893   2
  -1   1  -3 24.5916 1.29469   2
  -1   1   3 23.1908 1.29940   2
  -1  -1   3 26.3348 1.29958   2
  -1  -1  -3 26.0449 1.34873   3
   1   1  -3 21.8938 1.31161   1
   1   1  -4 251.030 13.4204   1
  -1   1   4 258.331 13.4145   2
  -1  -1  -4 262.991 13.4140   2
  -1  -1   4 251.913 13.4128   2
  -1  -1  -4 267.369 13.4276   3
  -1   1  -4 266.918 13.4138   2
  -1  -1  -5 219.648 11.5072   3
  -1  -1  -5 222.180 11.4892   2
   1   1  -5 215.059 11.4953   1
  -1   1  -5 231.519 11.4885   2
  -1  -1   5 226.356 11.4973   1
  -1   1   5 216.907 11.4892   2
  -1  -1   5 220.669 11.4874   2
  -1   1  -6 530.056 27.0711   2
  -1  -1  -6 549.508 27.0726   2
  -1  -1  -6 479.525 27.0789   3
  -1  -1   6 516.734 27.0706   2
  -1  -1   6 567.274 27.0804   1
  -1   1   6 498.394 27.0715   2
   1   1  -6 530.035 27.0779   1
  -1  -1  -7 60.9157 3.64498   3
  -1   1  -7 72.7425 3.61820   2
  -1   1   7 63.6039 3.61999   2
  -1  -1   7 76.0556 3.64157   1
   1   1  -7 68.8097 3.63070   1
  -1  -1  -7 73.2252 3.62038   2
  -1  -1   7 69.9647 3.61880   2
  -1   1   8 181.055 9.79815   2
  -1  -1   8 193.944 9.80913   1
  -1  -1   8 178.956 9.79615   2
  -1   1  -8 194.615 9.79641   2
  -1  -1  -8 197.817 9.79855   2
   1   1  -8 191.666 9.80328   1
  -1  -1   9 14.0841 0.82624   2
  -1  -1   9 14.5719 0.88247   1
  -1   1   9 12.6225 0.82615   2
  -1   1  -9 15.2580 0.81135   2
   1   1  -9 13.1305 0.86826   1
  -1  -1  -9 16.7145 0.82128   2
  -1   1  10 14.1139 0.92902   2
   1  -1 -10 15.9970 0.98530   1
   1   1 -10 16.2836 0.96410   1
  -1   1 -10 18.0367 0.91914   2
  -1  -1 -10 19.0094 0.93035   2
  -1  -1  10 15.6081 0.93140   2
   1   1 -11 23.1851 1.30061   1
  -1  -1  11 23.4932 1.27813   2
  -1   1  11 21.4494 1.27702   2
  -1   1 -11 22.8516 1.27253   2
   1  -1 -11 24.5339 1.32602   1
  -1  -1 -11 26.0817 1.27972   2
  -1   1  12 10.7984 0.73422   2
  -1  -1  12 11.0585 0.72183   2
   1   1 -12 11.5234 0.76535   1
  -1  -1 -12 13.0152 0.71802   2
  -1   1 -12 12.8716 0.71091   2
   1  -1 -12 12.7123 0.81222   1
  -1   1  13 10.1795 0.75489   2
   1  -1 -13 11.6096 0.84696   1
  -1   1 -13 13.9120 0.75001   2
  -1  -1 -13 13.2819 0.74692   2
   1   1 -13 12.4862 0.79943   1
  -1  -1  13 12.3794 0.75078   2
  -1   1 -14 58.8290 2.94397   2
  -1   1  14 53.3475 2.94734   2
   1  -1 -14 57.1768 2.96810   1
  -1  -1 -14 60.8333 2.94873   2
  -1  -1  14 51.8323 2.94342   2
   1   1 -14 54.4548 2.95527   1
   1   1 -15 33.2324 1.66138   1
  -1   1  15 29.6457 1.63277   2
   1  -1  15 21.9672 1.61461   3
   1  -1 -15 28.9532 1.68393   1
  -1   1 -15 34.7754 1.63534   2
  -1  -1  15 31.6389 1.62991   2
  -1  -1 -15 35.5930 1.64434   2
   1  -1  16 42.2494 2.41388   3
   1   1 -16 48.2263 2.42622   1
  -1  -1  16 42.1635 2.41254   2
   1  -1 -16 52.1434 2.46302   1
  -1  -1 -16 51.3473 2.41866   2
  -1   1 -16 46.5559 2.41244   2
  -1   1  16 39.8197 2.41309   2
  -1  -1  17 0.71127 0.38549   2
   1  -1 -17 1.67199 0.52134   1
   1   1 -17 1.68655 0.47040   1
  -1   1 -17 2.34198 0.39699   2
   1  -1  17 0.46823 0.42266   3
  -1  -1 -17 1.42984 0.39978   2
  -1   1  17 1.88721 0.38332   2
   1   1 -18 9.68141 0.69147   1
  -1  -1  18 9.26467 0.66147   2
  -1  -1 -18 10.8805 0.66596   2
  -1   1 -18 10.2397 0.65935   2
   1  -1 -18 10.0086 0.74708   1
  -1   1  18 8.85312 0.64517   2
   1  -1  18 8.12277 0.62754   3
  -1  -1 -19 1.12442 0.45234   2
  -1  -1  19 1.05263 0.41640   2
   1   1 -19 0.46493 0.48176   1
   1  -1 -19 0.63083 0.53941   1
  -1   1 -19 0.86321 0.41423   2
  -1   1  19 1.01176 0.40999   2
  -1   1 -20 3.78822 0.52608   2
   1   1 -20 4.67949 0.62545   1
  -1  -1 -20 4.48058 0.51833   2
   1  -1 -20 4.68359 0.61204   1
  -1  -1 -20 4.18308 0.44343   1
   1   1 -21 5.51068 0.62498   1
  -1  -1 -21 3.62490 0.45545   1
   1  -1 -21 3.51740 0.63615   1
  -1  -1 -21 4.11421 0.52509   2
  -1   1 -21 4.59689 0.54539   2
  -1  -1 -22 19.5515 1.05343   2
   1   1 -22 14.5764 1.02428   1
  -1   1 -22 18.3885 1.09718   2
   1  -1 -22 16.8638 1.11749   1
  -1  -1 -23 1.91298 0.58423   2
   1  -1 -23 1.17482 0.68038   1
  -1   1 -23 2.44876 0.65241   2
  -1   1 -24 1.49678 0.63017   2
  -1  -1 -24 0.70117 0.56062   2
  -1   1 -25 24.4778 1.45679   2
  -1  -1 -25 24.0457 1.43039   2
  -1   1 -26-0.38899 0.63760   2
  -1  -1 -26-0.58476 0.60921   2
  -1   1 -27 0.01054 0.67323   2
  -1  -1 -27 1.44668 0.66682   2
  -1   1 -28 2.35263 0.67981   2
  -1  -1 -28 0.53337 0.68401   2
  -1   1 -29 2.53806 0.72812   2
  -1  -1 -29 2.05883 0.73033   2
  -1   1 -30 2.23244 0.72060   2
  -1  -1 -30-0.16265 0.79804   2
  -1  -1 -31 0.07462 0.88202   2
  -1   1 -31 0.14778 0.72468   2
  -1  -1 -32 1.11748 0.86432   2
  -1   1 -32 0.59217 0.80755   2
  -1  -1 -33-0.82782 0.81585   2
  -1   1 -33-1.88118 0.83063   2
  -1  -2   0 1.48559 0.31102   2
  -1   2   1 115.800 6.13301   2
  -1  -2  -1 120.486 6.13008   2
  -1   2   2 3.65904 0.31659   2
  -1  -2  -2 4.22748 0.29140   2
  -1   2   3 1.30656 0.25382   2
  -1  -2  -3 1.25730 0.22626   2
  -1   2   4 291.964 15.2479   2
  -1  -2  -4 310.623 15.2476   2
  -1  -2   4 282.338 15.2435   2
   1   2  -4 299.756 15.2502   1
  -1  -2   5 6.08512 0.54007   1
   1   2  -5 6.54312 0.50829   1
  -1  -2  -5 8.28716 0.44595   2
  -1  -2   5 6.13049 0.44328   2
  -1   2   5 6.82984 0.46683   2
  -1   2   6 220.921 11.4681   2
  -1  -2   6 220.141 11.4644   2
  -1  -2  -6 230.252 11.4670   2
   1   2  -6 197.855 11.4687   1
  -1   2  -6 233.011 11.4656   2
  -1  -2   6 225.732 11.4748   1
  -1  -2   7 15.0304 0.74739   2
  -1  -2   7 15.6610 0.81589   1
  -1  -2  -7 13.5344 0.74614   2
  -1   2  -7 15.0834 0.74102   2
   1   2  -7 10.2761 0.72674   1
  -1  -2  -7 11.1023 0.85795   3
  -1   2   7 11.8353 0.75318   2
  -1  -2  -8 87.3203 4.35025   2
  -1  -2   8 81.3997 4.34548   2
  -1  -2  -8 80.9415 4.37251   3
  -1  -2   8 85.5200 4.36041   1
   1   2  -8 81.1223 4.35140   1
  -1   2   8 79.4293 4.35036   2
  -1   2  -8 88.5236 4.34674   2
  -1   2  -9 3.20917 0.33680   2
  -1   2   9 2.24185 0.36934   2
   1   2  -9 3.36571 0.40058   1
  -1  -2   9 3.73727 0.36573   2
  -1  -2  -9 2.37815 0.54590   3
  -1  -2  -9 3.68870 0.35107   2
  -1  -2   9 3.77716 0.44591   1
   1   2 -10 37.7288 2.06987   1
  -1   2  10 35.7734 2.06506   2
  -1  -2 -10 40.0194 2.05913   2
  -1   2 -10 43.1828 2.05847   2
  -1  -2 -10 35.5558 2.08878   3
  -1  -2  10 43.7487 2.10443   1
  -1  -2  10 37.5378 2.05601   2
  -1  -2  11 0.35820 0.31958   2
  -1  -2 -11 0.37944 0.32723   2
  -1   2  11 0.30176 0.35186   2
  -1  -2  11 0.63432 0.45662   1
   1   2 -11 0.41240 0.43435   1
  -1   2 -11 0.22519 0.31931   2
   1   2 -12 1.00693 0.42926   1
  -1  -2  12 2.15861 0.49007   1
  -1  -2 -12 1.41057 0.34125   2
  -1   2  12 0.73509 0.38627   2
  -1   2 -12 1.72961 0.39535   2
  -1  -2  12 1.31436 0.35207   2
  -1   2 -13 0.53515 0.36200   2
  -1  -2  13 0.83466 0.53290   1
  -1   2  13 0.81289 0.38478   2
   1   2 -13 1.23048 0.44225   1
  -1  -2 -13 1.04131 0.36518   2
  -1  -2  13 0.43932 0.35210   2
   1  -2 -14 4.15366 0.62404   1
  -1  -2  14 5.06186 0.46650   2
  -1   2 -14 6.58571 0.49702   2
   1   2 -14 4.32847 0.50869   1
  -1   2  14 4.43937 0.47696   2
  -1  -2 -14 5.12369 0.48781   2
  -1  -2 -15 1.52592 0.37891   2
  -1   2  15 1.45282 0.39667   2
   1  -2 -15-0.00668 0.54695   1
  -1  -2  15 0.78600 0.36166   2
  -1   2 -15 0.79269 0.41406   2
   1   2 -15 0.67365 0.41274   1
  -1  -2  16 0.70620 0.35907   2
  -1   2  16 0.42375 0.39274   2
  -1   2 -16 0.70823 0.41246   2
   1  -2 -16 0.70624 0.52479   1
  -1  -2 -16 1.08694 0.39124   2
   1   2 -16 0.66389 0.37291   1
  -1  -2  17 5.03860 0.49302   2
   1  -2 -17 6.32674 0.66071   1
   1   2 -17 5.00919 0.46768   1
  -1   2  17 5.45076 0.52515   2
  -1  -2 -17 6.25567 0.51218   2
  -1   2 -17 7.60412 0.54876   2
   1  -2 -18 5.80202 0.69084   1
  -1   2  18 5.39793 0.53621   2
  -1   2 -18 5.83773 0.53153   2
  -1  -2 -18 6.47233 0.53892   2
  -1  -2  18 5.75020 0.51126   2
   1   2 -18 6.82199 0.55054   1
   1  -2 -19 2.17633 0.61541   1
  -1   2 -19 2.20380 0.46294   2
  -1  -2 -19 2.57865 0.45593   2
   1  -2  19 1.29737 0.43179   3
   1   2 -19 1.15846 0.47388   1
   1  -2 -20 1.01826 0.62082   1
  -1  -2 -20 1.21533 0.46252   2
   1   2 -20 1.38397 0.50342   1
  -1   2 -20 2.14458 0.47416   2
   1  -2  20 0.90298 0.48644   3
  -1  -2 -21 4.40280 0.54309   2
  -1   2 -21 3.52488 0.51354   2
   1   2 -21 3.59735 0.53807   1
   1  -2  21 1.71319 0.41420   3
   1  -2 -21 5.18108 0.66240   1
   1  -2 -22 2.76137 0.66336   1
  -1  -2 -22 1.51225 0.51943   2
  -1   2 -22 2.15166 0.53727   2
  -1  -2 -23 0.21033 0.55843   2
  -1   2 -23 0.39192 0.55069   2
   1  -2 -23 0.36411 0.68626   1
  -1   2 -24 0.99504 0.56243   2
  -1  -2 -24 0.42923 0.56276   2
  -1  -2 -25 35.1268 1.92598   2
  -1   2 -25 33.3871 1.91751   2
  -1   2 -26 3.73007 0.63423   2
  -1  -2 -26 3.32627 0.66844   2
  -1  -2 -27 0.02128 0.65167   2
  -1   2 -27 0.01030 0.61785   2
  -1  -2 -28 0.72588 0.66337   2
  -1   2 -28 0.70317 0.68526   2
  -1   2 -29 5.02483 0.78896   2
  -1  -2 -29 4.44017 0.75664   2
  -1  -2 -30-0.40465 0.71571   2
  -1   2 -30-1.52404 0.76344   2
  -1   2 -31-0.01257 0.74007   2
  -1  -2 -31-1.75676 0.74085   2
  -1   2 -32 0.79559 0.80091   2
  -1  -2 -32 2.20594 0.86689   2
  -1  -2 -33-2.64390 1.01557   2
  -1   2 -33-0.50803 0.81503   2
  -1  -3   0 467.419 24.1799   2
  -1  -3  -1 325.013 16.6821   2
  -1   3   1 319.111 16.6884   2
  -1   3   2 4.52605 0.47131   2
  -1  -3  -2 5.79187 0.41287   2
  -1   3   3 64.8716 3.50921   2
  -1  -3  -3 69.4288 3.50524   2
  -1   3   4 645.639 33.8051   2
  -1  -3  -4 661.417 33.8035   2
  -1  -3  -5 637.318 32.0779   2
  -1  -3   5 611.215 32.0809   1
  -1   3   5 610.672 32.0797   2
  -1  -3   6 40.5731 2.21211   2
  -1   3   6 42.9035 2.22485   2
  -1  -3   6 34.8331 2.23069   1
  -1  -3  -6 49.3972 2.22000   2
  -1  -3   7 263.662 13.7183   1
  -1   3   7 253.085 13.7173   2
  -1  -3   7 268.117 13.7114   2
  -1  -3  -7 273.673 13.7161   2
  -1  -3   8 198.718 10.3798   2
  -1   3   8 186.037 10.3831   2
  -1  -3   8 198.670 10.3883   1
  -1  -3  -8 219.476 10.3848   2
   1  -3   9 18.8322 1.00201   1
  -1   3   9 15.6195 1.03794   2
  -1  -3   9 18.5384 1.02565   2
  -1  -3  -9 20.2124 1.02985   2
  -1  -3   9 19.4093 1.08239   1
   1  -3  10 59.8876 3.16960   1
  -1   3 -10 62.9146 3.18381   2
  -1  -3 -10 62.6737 3.18957   2
  -1  -3  10 58.2667 3.18452   2
  -1  -3  10 61.1748 3.20635   1
  -1   3  10 60.2919 3.19608   2
  -1  -3 -10 63.9271 3.22093   3
  -1  -3 -11 22.4004 1.26855   3
  -1   3 -11 22.4470 1.18750   2
   1  -3  11 20.0652 1.16931   1
  -1  -3  11 22.3940 1.25400   1
  -1  -3 -11 23.6272 1.19558   2
  -1  -3  11 21.9040 1.18994   2
  -1   3  11 20.9785 1.21856   2
  -1  -3  12 47.2581 2.64949   1
  -1   3  12 42.0268 2.63863   2
  -1  -3 -12 54.1035 2.63964   2
  -1   3 -12 55.6942 2.63285   2
  -1  -3 -12 53.0585 2.67172   3
   1  -3  12 49.3489 2.60851   1
  -1  -3  12 49.3160 2.63307   2
  -1   3 -13 77.8274 3.80304   2
  -1  -3 -13 78.2813 3.80507   2
  -1  -3 -13 63.6186 3.80000   3
  -1   3  13 68.5132 3.80577   2
  -1  -3  13 69.8633 3.79779   2
   1  -3  13 73.5607 3.77871   1
  -1  -3  13 79.2979 3.82528   1
  -1   3  14 8.29573 0.58089   2
  -1  -3  14 6.97336 0.65669   1
  -1  -3 -14 9.61862 0.56511   2
  -1   3 -14 7.90724 0.55030   2
  -1  -3  14 6.27925 0.54679   2
  -1  -3  15 65.6382 3.47655   1
  -1   3 -15 68.7231 3.45939   2
  -1  -3 -15 70.3798 3.46262   2
  -1  -3  15 64.7680 3.45319   2
  -1   3  15 60.3148 3.45906   2
  -1  -3 -16 14.4932 0.78344   2
  -1  -3  16 10.6782 0.76612   2
  -1   3 -16 12.9093 0.76878   2
  -1  -3  16 11.4200 0.85716   1
  -1   3  16 12.2523 0.78917   2
  -1  -3 -17 12.3888 0.74950   2
  -1   3 -17 10.4888 0.72047   2
  -1   3  17 10.9690 0.74000   2
  -1  -3  17 11.6551 0.72735   2
   1  -3 -18 18.5106 1.18796   1
  -1   3  18 17.6585 1.09341   2
  -1  -3  18 18.6609 1.07656   2
  -1  -3 -18 20.0808 1.09197   2
  -1   3 -18 18.6638 1.07933   2
   1  -3 -19 0.25953 0.65697   1
  -1   3 -19 0.80066 0.43486   2
  -1  -3 -19 0.04383 0.43859   2
  -1  -3 -20 2.93253 0.49800   2
   1  -3 -20 3.01679 0.67114   1
  -1   3 -20 1.79755 0.46991   2
  -1   3 -21 0.29790 0.48199   2
   1  -3 -21-1.06390 0.70478   1
  -1  -3 -21 0.00793 0.46446   2
   1  -3 -22 4.43257 0.79759   1
  -1   3 -22 4.37591 0.56904   2
  -1  -3 -22 3.30968 0.56527   2
   1  -3  22 3.54548 0.53785   3
  -1  -3 -23 28.3908 1.34645   2
   1  -3 -23 25.7221 1.44869   1
  -1   3 -23 26.8272 1.34554   2
  -1  -3 -24 33.9069 1.83005   2
  -1   3 -24 30.5841 1.81933   2
  -1  -3 -25 4.45631 0.64949   2
  -1   3 -25 4.69947 0.67527   2
  -1  -3 -26 6.87278 0.72612   2
  -1   3 -26 6.39425 0.76440   2
  -1  -3 -27 1.86639 0.65312   2
  -1   3 -27 0.74583 0.67747   2
  -1  -3 -28-0.25709 0.68547   2
  -1   3 -28-0.31394 0.67403   2
  -1   3 -29 1.81078 0.74814   2
  -1  -3 -29 3.57038 0.77382   2
  -1  -3 -30 0.27811 0.72707   2
  -1  -3 -31 2.80150 0.76870   2
  -1  -3 -32 0.06637 0.79357   2
  -1  -3 -33-0.93485 0.81997   2
  -1  -4   0 426.751 22.0879   2
  -1   4   1 28.4262 1.55044   2
  -1  -4  -1 26.0077 1.47898   2
  -1   4   2 812.971 42.0880   2
  -1  -4  -2 814.771 42.0814   2
  -1  -4  -3 55.6770 2.86528   2
  -1   4   3 53.2881 2.87287   2
  -1  -4  -4 190.854 9.59692   2
  -1   4   4 178.619 9.60148   2
  -1  -4  -5 68.7452 3.48864   2
  -1   4   5 64.4508 3.49718   2
  -1  -4  -6 122.226 6.11867   2
  -1   4   6 112.989 6.12131   2
  -1  -4  -7 224.720 10.9337   2
  -1   4   7 199.986 10.9373   2
  -1  -4   7 206.824 10.9365   1
  -1  -4  -8 10.6599 0.61698   2
  -1  -4   8 9.77159 0.60827   2
  -1   4   8 9.53547 0.64219   2
  -1  -4   8 8.88161 0.64974   1
  -1  -4   9 105.214 5.66604   2
  -1  -4   9 111.119 5.68085   1
  -1  -4  -9 120.294 5.67555   2
  -1   4   9 101.704 5.67288   2
  -1  -4  10 4.22999 0.41711   2
  -1  -4  10 3.17724 0.52309   1
  -1   4  10 4.15539 0.46388   2
  -1  -4 -10 4.15327 0.40269   2
  -1  -4  11 0.21671 0.33227   2
  -1  -4 -11-0.13132 0.35247   2
  -1   4  11-0.17218 0.40409   2
  -1  -4  11 0.29730 0.51031   1
   1  -4  11 0.15780 0.28988   1
  -1  -4  12 11.7523 0.75264   1
  -1  -4 -12 11.3681 0.66934   2
  -1  -4  12 10.3114 0.66328   2
   1  -4  12 9.94999 0.63987   1
  -1   4  12 8.65432 0.69550   2
  -1  -4 -13 13.8066 0.79561   2
  -1  -4 -13 13.5674 0.89725   3
   1  -4  13 13.2706 0.75889   1
  -1  -4  13 13.0371 0.78653   2
  -1  -4  13 13.7119 0.87408   1
  -1   4  13 11.0910 0.80265   2
  -1   4  14-0.14817 0.41799   2
  -1  -4 -14 0.40920 0.54644   3
   1  -4  14 0.85634 0.31876   1
  -1  -4  14 0.20618 0.35235   2
  -1  -4  14 0.17243 0.51368   1
  -1  -4 -14-0.34951 0.37319   2
  -1  -4  15 0.51845 0.36051   2
  -1   4  15 0.41602 0.41808   2
  -1  -4  15 0.29032 0.60413   1
  -1  -4 -15 0.86888 0.52868   3
  -1  -4 -15 1.02513 0.40560   2
   1  -4  15 0.53440 0.32658   1
  -1  -4 -16 0.07578 0.38641   2
  -1  -4  16 0.16441 0.51272   1
   1  -4  16 0.71765 0.33314   1
  -1  -4  16 0.48839 0.36650   2
  -1   4  16 0.65060 0.43028   2
  -1  -4 -17-0.50595 0.41812   2
  -1   4  17-0.00640 0.41897   2
  -1  -4  17 0.53022 0.54727   1
  -1  -4  17 0.46213 0.36174   2
  -1  -4  18-0.41242 0.54898   1
  -1  -4 -18-0.37607 0.42709   2
  -1   4  18-0.38327 0.44332   2
  -1  -4  18-0.44215 0.40830   2
  -1  -4 -19 13.3993 0.86320   2
   1  -4 -20 13.2578 1.09416   1
  -1  -4 -20 15.6163 0.95458   2
  -1  -4 -21 12.6714 0.85439   2
   1  -4 -21 11.9867 1.01478   1
   1  -4 -22 3.80915 0.82719   1
  -1  -4 -22 3.20509 0.69259   1
  -1  -4 -22 2.89469 0.55395   2
   1  -4 -23-0.32069 0.80620   1
  -1  -4 -23 0.13523 0.56000   2
  -1  -4 -24 0.53941 0.55398   2
  -1  -4 -25 7.45767 0.75268   2
  -1  -4 -26 0.71016 0.63167   2
  -1  -4 -27 0.01107 0.63668   2
  -1  -4 -28 6.67962 0.79781   2
  -1  -4 -29 1.96127 0.71144   2
  -1  -4 -30 3.93814 0.75158   2
  -1  -4 -31 2.21633 0.77617   2
  -1  -4 -32-1.22148 0.83428   2
  -1  -4 -33 1.42427 0.81311   2
  -1  -5   0 932.002 48.2003   2
  -1  -5  -1 690.800 35.3415   2
  -1   5   1 673.008 35.3548   2
  -1  -5  -2 207.640 10.6163   2
  -1   5   2 200.357 10.6353   2
  -1  -5  -3 74.6795 3.76671   2
  -1   5   3 67.9979 3.78821   2
  -1   5   4 14.1082 0.92078   2
  -1  -5  -4 14.5791 0.85987   2
  -1   5   5 191.848 10.2723   2
  -1  -5  -5 203.128 10.2653   2
  -1   5   6 83.6647 4.53999   2
  -1  -5  -6 89.5690 4.53153   2
  -1   5   7 1.49301 0.45702   2
  -1  -5  -7 2.38592 0.39670   2
  -1  -5  -8 53.3777 2.78780   2
  -1   5   8 50.5549 2.79169   2
  -1  -5   8 55.4456 2.80775   1
  -1  -5   9 18.4555 1.00240   2
  -1   5   9 16.8300 1.04080   2
  -1  -5   9 17.2257 1.06155   1
  -1  -5  -9 17.9989 1.01719   2
  -1  -5  10 25.0272 1.33034   2
  -1  -5  10 23.6999 1.37963   1
  -1   5  10 22.1850 1.36001   2
  -1  -5 -10 26.0180 1.34244   2
  -1  -5 -11 0.23149 0.41210   2
  -1  -5  11 0.20806 0.40895   2
  -1   5  11 0.57988 0.42206   2
  -1  -5  11 0.66672 0.52037   1
  -1  -5  12 3.34568 0.55971   1
  -1   5  12 3.34500 0.48539   2
  -1  -5 -12 3.49563 0.41653   2
   1  -5  12 4.37619 0.43068   1
  -1  -5  12 4.15681 0.42845   2
   1  -5  13 3.93104 0.47247   1
  -1  -5  13 3.66341 0.59692   1
  -1  -5 -13 5.09836 0.45226   2
  -1  -5  13 3.25596 0.41909   2
  -1   5  13 4.77712 0.49305   2
  -1  -5 -14 4.59757 0.46656   2
   1  -5  14 4.19852 0.44487   1
  -1  -5  14 4.79844 0.58418   1
  -1   5  14 4.02168 0.51217   2
  -1  -5  14 4.56703 0.44051   2
  -1  -5 -15 1.20196 0.39915   2
  -1  -5  15 0.84041 0.37522   2
  -1  -5  15 1.26624 0.52430   1
  -1  -5 -15 0.95654 0.60393   3
  -1   5  15 1.10129 0.47329   2
   1  -5  15 1.31708 0.36830   1
  -1   5  16 3.10712 0.46624   2
  -1  -5 -16 2.94869 0.61015   3
  -1  -5 -16 3.41070 0.46455   2
  -1  -5  16 3.18146 0.42317   2
   1  -5  16 2.73815 0.40132   1
  -1  -5  16 2.72000 0.55961   1
  -1  -5  17 1.34461 0.60614   1
   1  -5  17 1.28720 0.37413   1
  -1   5  17 0.54436 0.44917   2
  -1  -5 -17 0.84528 0.44736   2
  -1  -5 -17 0.73905 0.55626   3
  -1  -5  17 1.76948 0.40517   2
  -1  -5 -18 0.23551 0.42159   2
  -1  -5  18 0.12093 0.58116   1
   1  -5  18 0.56157 0.38831   1
  -1  -5 -19 10.2612 0.74395   2
  -1  -5  19 10.8541 0.83520   1
  -1  -5  20 1.18341 0.62144   1
  -1  -5 -20 1.35653 0.49509   2
  -1  -5 -21-0.21962 0.53415   2
   1  -5 -22 17.2757 1.38905   1
  -1  -5 -22 21.5823 1.24186   2
   1  -5 -23 11.8870 1.18551   1
  -1  -5 -23 14.8854 0.97450   2
  -1  -5 -24 10.9543 0.85692   2
  -1  -5 -25 4.28873 0.66474   2
  -1  -5 -26 0.29663 0.60847   2
  -1  -5 -27 4.49627 0.73873   2
  -1  -5 -28 3.42396 0.74666   2
  -1  -5 -29 2.78259 0.75422   2
  -1  -5 -30 2.89898 0.78378   2
  -1  -5 -31 1.20224 0.73072   2
  -1  -5 -32 0.04065 0.80734   2
  -1  -6   0 16.0105 1.12730   2
  -1  -6  -1 279.578 14.4977   2
  -1  -6  -2 219.142 11.4501   2
  -1   6   2 223.531 11.4823   2
  -1   6   3 130.092 7.01338   2
  -1  -6  -3 136.799 6.98365   2
  -1   6   4 233.292 12.6115   2
  -1  -6  -4 250.568 12.5994   2
  -1   6   5 1.86764 0.52519   2
  -1  -6  -5 2.47018 0.43151   2
  -1   6   6 65.9972 3.53310   2
  -1  -6  -6 67.9150 3.51798   2
  -1  -6  -7 131.083 6.69129   2
  -1   6   7 125.970 6.69604   2
  -1   6   8 0.13255 0.48794   2
  -1  -6  -8 0.58211 0.38709   2
  -1  -6  -9 44.5476 2.30997   2
  -1   6   9 41.8890 2.32659   2
  -1   6  10 16.4932 1.11151   2
  -1  -6  10 18.9689 1.07459   2
  -1  -6 -10 21.5663 1.11175   2
  -1  -6  10 19.1115 1.16138   1
  -1   6  11 13.0106 0.85055   2
  -1  -6  11 11.1153 0.82252   1
  -1  -6 -11 16.5962 0.82358   2
  -1  -6  11 12.0352 0.79284   2
  -1  -6  12 27.2854 1.50199   2
  -1  -6 -12 26.6004 1.50963   2
  -1  -6  12 32.9146 1.63145   1
  -1   6  12 26.4537 1.53821   2
  -1  -6  13 4.42193 0.61424   1
   1  -6  13 4.94884 0.51910   1
  -1  -6  13 5.09317 0.49833   2
  -1   6  13 5.29137 0.57962   2
  -1  -6 -13 7.41611 0.54010   2
  -1  -6 -14 9.30302 0.58865   2
  -1  -6  14 7.47038 0.68652   1
   1  -6  14 6.08171 0.49279   1
  -1  -6  14 7.32244 0.54928   2
  -1   6  14 7.67897 0.62386   2
  -1  -6  15 5.27048 0.63959   1
  -1  -6 -15 7.46613 0.52357   2
  -1   6  15 4.53326 0.51560   2
   1  -6  15 4.00818 0.47468   1
  -1  -6  15 4.17261 0.47578   2
  -1  -6  16 5.87091 0.64552   1
   1  -6  16 5.28072 0.52133   1
  -1  -6  16 5.81075 0.48383   2
  -1  -6 -16 5.50515 0.55195   2
  -1   6  16 5.56115 0.56299   2
   1  -6  17 15.1571 0.90381   1
  -1   6  17 13.0390 0.93877   2
  -1  -6  17 15.3334 0.90434   2
  -1  -6  17 14.5935 0.98480   1
  -1  -6 -17 14.8933 1.03676   3
  -1  -6 -17 16.6719 0.92934   2
  -1  -6 -18-0.68743 0.64300   3
  -1  -6 -18 0.46776 0.47033   2
  -1  -6  18 0.42221 0.57257   1
   1  -6  18-0.06943 0.41465   1
   1  -6  19 1.87708 0.44799   1
  -1  -6 -19 1.21123 0.57496   3
  -1  -6  19 2.87028 0.67816   1
  -1  -6 -19 2.99429 0.49959   2
   1  -6  20 0.16118 0.44806   1
  -1  -6 -20 0.00845 0.51928   2
  -1  -6  20 0.76883 0.61559   1
  -1  -6  21 15.8586 1.18338   1
  -1  -6 -21 20.0427 1.12376   2
  -1  -6 -22 24.3014 1.35357   2
  -1  -6  22 20.7989 1.40035   1
  -1  -6 -23 20.5657 1.26558   2
  -1  -6 -24 0.62988 0.60587   2
  -1  -6 -25 4.76111 0.72655   2
  -1  -6 -26 0.14334 0.65580   2
  -1  -6 -27 0.31573 0.65238   2
  -1  -6 -28 4.38647 0.74745   2
  -1  -6 -29-0.50082 0.73457   2
  -1  -6 -30 2.67856 0.81008   2
  -1  -6 -31 0.57759 0.78111   2
  -1  -6 -32-0.47006 0.82356   2
  -1  -7   0 92.3872 4.87432   2
  -1  -7  -1 88.9027 4.68179   2
  -1   7   2 5.37431 0.91840   2
  -1  -7  -2 5.20755 0.63512   2
  -1   7   3 28.3952 1.71527   2
  -1  -7  -3 28.7821 1.59161   2
  -1  -7  -4 47.7544 2.50213   2
  -1   7   4 45.4268 2.56034   2
  -1  -7  -5 57.5685 3.00918   2
  -1   7   5 55.9837 3.04028   2
  -1  -7  -6-0.09818 0.42154   2
  -1   7   6 0.28129 0.56851   2
  -1   7   7 3.87032 0.58485   2
  -1  -7  -7 4.65874 0.47673   2
  -1   7   8 3.61335 0.59463   2
  -1  -7  -8 3.87508 0.46153   2
  -1   7   9 35.5568 2.14489   2
  -1  -7  -9 42.4924 2.12195   2
  -1   7  10 1.48966 0.50166   2
  -1  -7 -10 0.59620 0.41990   2
  -1   7  11 2.75841 0.52329   2
  -1  -7 -11 1.74559 0.45722   2
  -1  -7  11 1.51789 0.41882   2
  -1  -7  11 2.16895 0.60607   1
  -1  -7  12-0.02755 0.54669   1
  -1  -7 -12-0.24272 0.43371   2
  -1  -7  12 0.53694 0.37539   2
  -1   7  12 0.39796 0.47663   2
  -1   7  13 22.6240 1.46032   2
  -1  -7  13 25.4174 1.42554   2
  -1  -7 -13 29.9844 1.45123   2
  -1  -7  13 25.7044 1.48300   1
  -1  -7 -14-0.24970 0.45005   2
  -1  -7  14 0.37001 0.46705   2
  -1   7  14-0.29051 0.46785   2
  -1  -7  14-0.04521 0.51456   1
  -1  -7  15 1.57336 0.57554   1
  -1  -7  15 1.41483 0.40371   2
   1  -7  15 1.95328 0.41235   1
  -1   7  15 1.34182 0.49914   2
  -1  -7 -15 1.01141 0.43352   2
  -1  -7 -16 3.98890 0.52508   2
  -1   7  16 4.01947 0.55960   2
  -1  -7  16 4.36310 0.46605   2
   1  -7  16 3.56070 0.55546   1
  -1  -7  16 4.83955 0.64151   1
  -1  -7  17 0.75539 0.59748   1
  -1  -7 -17-0.63558 0.44181   2
   1  -7  17 0.06914 0.45808   1
   1  -7  18 4.44299 0.55385   1
  -1  -7  18 4.17749 0.66801   1
  -1  -7 -18 4.73674 0.72594   3
  -1  -7 -18 4.95730 0.56211   2
   1  -7  19 4.23267 0.55651   1
  -1  -7 -19 6.19012 0.74487   3
  -1  -7 -19 5.08096 0.59338   2
  -1  -7  19 6.01195 0.72499   1
  -1  -7 -20 4.20391 0.55997   2
   1  -7  20 2.51623 0.53553   1
  -1  -7  20 3.89506 0.70067   1
  -1  -7 -20 2.32042 0.72554   3
   1  -7  21 0.57335 0.51204   1
  -1  -7  21-0.35185 0.69129   1
  -1  -7 -22 0.35634 0.58675   2
  -1  -7  22 1.47189 0.72795   1
  -1  -7 -23 9.55815 0.77700   2
  -1  -7  23 8.40680 0.89340   1
  -1  -7 -24 9.41349 0.82993   2
  -1  -7 -25-0.26909 0.66102   2
  -1  -7 -26 4.22407 0.73337   2
  -1  -7 -27 7.35415 0.83296   2
  -1  -7 -28 0.13349 0.73026   2
  -1  -7 -29 0.24875 0.71779   2
  -1  -7 -30-2.10538 0.77643   2
  -1  -7 -31-0.23726 0.78239   2
  -1  -7 -32-0.01442 0.85938   2
  -1  -8   0 28.3506 1.68865   2
  -1  -8   1 28.2179 1.76784   2
  -1  -8  -1 30.5749 1.69744   2
  -1  -8  -2 15.3982 0.99664   2
  -1   8   2 15.5015 1.27558   2
  -1   8   3 3.79699 0.91834   2
  -1  -8  -3 4.88261 0.54794   2
  -1  -8  -4-0.29272 0.50824   2
  -1   8   4 0.82700 0.76098   2
  -1   8   5-0.27697 0.71221   2
  -1  -8  -5-0.78583 0.49510   2
  -1   8   6 30.8031 1.79608   2
  -1  -8  -6 32.1489 1.73436   2
  -1  -8  -7 23.8452 1.30349   2
  -1   8   7 21.6939 1.37713   2
  -1   8   8 0.99051 0.59198   2
  -1  -8  -8 0.70723 0.51270   2
  -1  -8  -9 13.7684 0.87653   2
  -1   8   9 14.2985 0.94971   2
  -1   8  10 10.6779 0.83412   2
  -1  -8 -10 12.1401 0.78466   2
  -1   8  11 36.7386 2.14629   2
  -1  -8 -11 41.5600 2.12747   2
  -1  -8 -12 0.03567 0.46007   2
  -1   8  12 1.18864 0.53845   2
  -1  -8  12 0.16299 0.40716   2
  -1  -8  12-0.43332 0.61765   1
  -1  -8  13 0.12219 0.39395   2
  -1  -8  13 0.56926 0.58811   1
  -1  -8 -13 0.53941 0.44013   2
  -1   8  13 0.83748 0.49522   2
  -1  -8 -14 0.69314 0.46369   2
  -1  -8  14 0.59958 0.53546   1
  -1  -8  14 0.53469 0.39087   2
  -1   8  14 0.75876 0.52171   2
  -1   8  15 3.65662 0.56226   2
  -1  -8  15 4.00759 0.50084   2
  -1  -8 -15 4.02318 0.52724   2
  -1  -8  15 4.09919 0.69898   1
  -1  -8  16 0.91126 0.60198   1
  -1  -8 -16 1.64347 0.47097   2
  -1  -8  16 0.77373 0.42349   2
   1  -8  16 0.91429 0.48537   1
  -1   8  16 0.84728 0.53597   2
  -1  -8 -17 7.83704 0.68482   2
   1  -8  17 10.1548 0.79985   1
  -1  -8  17 8.24800 0.80848   1
  -1  -8 -18 3.00439 0.54081   2
   1  -8  18 2.74551 0.54526   1
  -1  -8  18 1.58270 0.68175   1
  -1  -8 -19 0.66791 0.52346   2
  -1  -8  19-0.71703 0.68636   1
   1  -8  19-0.20389 0.53290   1
  -1  -8 -20 0.29676 0.52670   2
   1  -8  20 0.55047 0.55572   1
  -1  -8  20 0.49569 0.70143   1
   1  -8  21 12.5005 0.95734   1
  -1  -8  21 14.4818 1.08496   1
  -1  -8 -21 18.8247 1.03302   2
  -1  -8 -22 8.70292 0.73872   2
   1  -8  22 6.30292 0.69288   1
  -1  -8  22 8.62025 0.97677   1
  -1  -8 -23 5.98543 0.71008   2
  -1  -8 -24 3.91570 0.69387   2
  -1  -8 -25 0.86849 0.68150   2
  -1  -8 -26 0.55990 0.68120   2
  -1  -8 -27 1.56132 0.74496   2
  -1  -8 -28-0.17805 0.73825   2
  -1  -8 -29 2.06851 0.74082   2
  -1  -8 -30 1.20418 0.75732   2
  -1  -8 -31 1.53772 0.80840   2
  -1  -9   0-1.19136 0.75123   2
  -1  -9  -1-0.54179 0.69711   2
  -1  -9   1-0.75897 0.82816   2
  -1  -9  -2 15.8771 1.07343   2
  -1  -9  -3 5.11332 0.60710   2
  -1   9   3 4.88123 1.05743   2
  -1  -9  -4 71.6547 3.82551   2
  -1   9   4 74.1605 3.91839   2
  -1  -9  -5 79.5847 4.19330   2
  -1   9   5 80.1333 4.26168   2
  -1   9   6 80.0612 4.20387   2
  -1  -9  -6 78.3777 4.16160   2
  -1   9   7 19.5283 1.31036   2
  -1  -9  -7 21.8631 1.22910   2
  -1   9   8 34.1426 1.97513   2
  -1  -9  -8 36.2221 1.93707   2
  -1  -9  -9 47.0446 2.44220   2
  -1   9   9 43.5343 2.47682   2
  -1  -9 -10 1.49646 0.48232   2
  -1   9  10 1.37312 0.60272   2
  -1  -9 -11 1.72741 0.48443   2
  -1   9  11 0.92343 0.59122   2
  -1  -9 -12 31.2708 1.62158   2
  -1   9  12 26.5298 1.65680   2
  -1  -9 -13 1.62731 0.49577   2
  -1   9  13 0.95048 0.55071   2
  -1  -9  13 1.05726 0.43944   2
  -1  -9  13 1.38818 0.63302   1
  -1  -9 -14 4.51766 0.52984   2
  -1   9  14 4.08510 0.60644   2
  -1  -9  14 4.38987 0.67117   1
  -1  -9  14 4.32703 0.48959   2
  -1  -9  15 9.93665 0.66867   2
  -1   9  15 9.25844 0.76340   2
  -1  -9 -15 10.6011 0.72269   2
  -1  -9  15 7.02901 0.73512   1
   1  -9  16 7.40563 0.70576   1
  -1  -9 -16 8.41559 0.69580   2
  -1  -9  16 8.91725 0.90121   1
   1  -9  17 2.57652 0.58420   1
  -1  -9  17 2.49407 0.68581   1
  -1  -9 -17 2.58249 0.52349   2
  -1  -9 -18 7.84321 0.71084   2
  -1  -9  18 8.35296 0.85327   1
   1  -9  18 8.28309 0.77021   1
  -1  -9  19 0.69854 0.72930   1
  -1  -9 -19 1.48971 0.57526   2
   1  -9  19 0.06613 0.58230   1
  -1  -9  20 4.86921 0.81789   1
   1  -9  20 3.86374 0.65364   1
  -1  -9 -20 4.57251 0.64076   2
  -1  -9 -21 5.35839 0.67018   2
   1  -9  21 4.83037 0.68095   1
  -1  -9  21 5.28218 0.83007   1
  -1  -9 -22-0.25136 0.63193   2
  -1  -9  22-0.28523 0.78232   1
  -1  -9 -23 2.65517 0.66495   2
  -1  -9 -24-0.02220 0.65791   2
  -1  -9 -25 3.64673 0.71498   2
  -1  -9 -26 0.94914 0.69704   2
  -1  -9 -27 0.25124 0.73246   2
  -1  -9 -28-0.76893 0.78117   2
  -1  -9 -29 0.67532 0.76847   2
  -1  -9 -30 0.83155 0.80266   2
  -1  -9 -31-0.16816 0.81433   2
  -1 -10   0-1.29493 0.76740   2
  -1 -10   1 5.80402 0.94203   2
  -1 -10  -1 7.15792 0.81050   2
  -1 -10  -2 71.9488 3.82036   2
  -1 -10  -3 3.86887 0.62228   2
  -1  10   3 2.43717 1.09151   2
  -1 -10  -4 55.6619 3.03814   2
  -1  10   4 59.9988 3.17271   2
  -1  10   5 11.6567 1.09134   2
  -1 -10  -5 10.7145 0.82186   2
  -1 -10  -6 1.16475 0.54174   2
  -1  10   6-0.12016 0.82127   2
  -1 -10  -7 28.0592 1.58839   2
  -1  10   7 28.6214 1.69953   2
  -1  10   8 3.58752 0.75458   2
  -1 -10  -8 4.57628 0.55711   2
  -1  10   9 4.53764 0.75018   2
  -1 -10  -9 6.88685 0.63922   2
  -1 -10 -10 21.5117 1.20049   2
  -1  10  10 18.9751 1.26712   2
  -1 -10 -11 7.30797 0.64155   2
  -1  10  11 7.09747 0.72253   2
  -1  10  12-0.16779 0.61909   2
  -1 -10 -12 0.77952 0.49163   2
  -1  10  13 2.53600 0.64270   2
  -1 -10 -13 4.12505 0.52580   2
  -1 -10  14 1.26298 0.68028   1
  -1 -10  14 1.78285 0.46192   2
  -1  10  14 1.63059 0.59362   2
  -1 -10 -14 1.59365 0.53290   2
  -1 -10 -15 1.08904 0.51944   2
  -1 -10  15-0.03021 0.69522   1
  -1 -10  16 2.60887 0.62499   1
  -1 -10 -16 3.65074 0.54824   2
   1 -10  17 2.98741 0.65451   1
  -1 -10 -17 1.80892 0.57370   2
  -1 -10  17 2.81924 0.93789   1
  -1 -10 -18 6.23780 0.64322   2
   1 -10  18 4.84408 0.69790   1
  -1 -10  18 5.51928 0.80992   1
  -1 -10 -19 0.48587 0.54749   2
  -1 -10  19 1.02999 0.77852   1
   1 -10  19 1.27673 0.79542   1
   1 -10  20 0.66539 0.66213   1
  -1 -10 -20 0.55917 0.60224   2
  -1 -10  20-0.60412 0.81190   1
  -1 -10 -21 9.86724 0.85598   2
   1 -10  21 9.27882 0.86641   1
  -1 -10  21 11.3419 1.01339   1
  -1 -10 -22 4.89275 0.69205   2
  -1 -10 -23 0.03383 0.65726   2
  -1 -10 -24 0.41098 0.68969   2
  -1 -10 -25-0.43986 0.70223   2
  -1 -10 -26 1.25057 0.71670   2
  -1 -10 -27-0.83590 0.74602   2
  -1 -10 -28 0.98996 0.76622   2
  -1 -10 -29 0.43693 0.78725   2
  -1 -10 -30 1.23721 0.84853   2
  -1 -11   0 53.6765 2.96146   2
  -1 -11   1 29.4790 1.87133   2
  -1 -11  -1 32.8056 1.82529   2
  -1 -11   2 103.531 5.92927   2
  -1 -11  -2 117.512 5.88211   2
  -1 -11  -3-0.14690 0.62778   2
  -1 -11  -4 4.57657 0.65889   2
  -1  11   4 4.79493 1.06686   2
  -1 -11  -5 16.5924 1.06999   2
  -1  11   5 14.9687 1.32626   2
  -1 -11  -6 4.06109 0.60909   2
  -1  11   6 4.41196 0.95866   2
  -1 -11  -7 9.61227 0.75052   2
  -1  11   7 7.32535 1.00056   2
  -1 -11  -8 19.1840 1.12712   2
  -1  11   8 16.3858 1.25744   2
  -1  11   9 28.6316 1.79878   2
  -1 -11  -9 31.6828 1.71247   2
  -1 -11 -10 25.0945 1.40505   2
  -1  11  10 22.3697 1.46148   2
  -1  11  11 0.35753 0.66647   2
  -1 -11 -11 0.72800 0.49977   2
  -1  11  12 0.78973 0.67203   2
  -1 -11 -12 1.17237 0.55322   2
  -1 -11 -13 3.27804 0.55328   2
  -1 -11 -14 4.36822 0.59166   2
  -1 -11 -15 0.81731 0.56239   2
  -1 -11  15 0.89431 0.74140   1
  -1 -11 -16 6.55219 0.65541   2
  -1 -11  16 4.13342 0.83466   1
  -1 -11 -17 0.61416 0.56737   2
  -1 -11  17 1.95554 0.65764   1
  -1 -11 -18 2.47140 0.61592   2
  -1 -11  18 4.17454 0.99541   1
   1 -11  18 1.69684 0.73589   1
   1 -11  19 3.34307 0.61090   1
  -1 -11  19 2.65893 0.82050   1
  -1 -11 -19 3.56424 0.64611   2
  -1 -11 -20 0.15775 0.60131   2
   1 -11  20-0.40435 0.86425   1
  -1 -11  20 0.25857 0.86636   1
  -1 -11  21 0.87895 0.86470   1
  -1 -11 -21 0.31825 0.62534   2
  -1 -11 -22 2.97177 0.69879   2
  -1 -11 -23 2.91671 0.68301   2
  -1 -11 -24 1.48258 0.70186   2
  -1 -11 -25-0.36448 0.70353   2
  -1 -11 -26 0.71090 0.72932   2
  -1 -11 -27 0.39340 0.77530   2
  -1 -11 -28-0.18846 0.77452   2
  -1 -11 -29-0.67256 0.80931   2
  -1 -11 -30 0.86107 0.86473   2
  -1 -12   0 37.8457 2.18317   2
  -1 -12  -1 8.51415 0.91178   2
  -1 -12   1 9.61604 0.99065   2
  -1 -12  -2 19.7443 1.24067   2
  -1 -12   2 17.9496 1.41094   2
  -1 -12  -3 19.2173 1.24753   2
  -1 -12  -4 11.8920 0.85181   2
  -1  12   4 8.66684 1.31280   2
  -1 -12  -5 5.27535 0.65482   2
  -1  12   5 4.26122 1.08491   2
  -1  12   6 22.5131 1.56909   2
  -1 -12  -6 21.7214 1.31854   2
  -1 -12  -7 18.8273 1.13526   2
  -1  12   7 16.8948 1.35806   2
  -1 -12  -8 1.62199 0.55923   2
  -1  12   8 0.93341 0.87537   2
  -1  12   9 2.44495 0.84146   2
  -1 -12  -9 3.90505 0.57746   2
  -1 -12 -10 0.71906 0.56519   2
  -1  12  10 1.35672 0.78657   2
  -1 -12 -11 6.25288 0.65651   2
  -1  12  11 6.23037 0.84307   2
  -1 -12 -12 15.1294 0.99501   2
  -1 -12 -13 1.53795 0.57041   2
  -1 -12 -14 2.69634 0.59603   2
  -1 -12 -15 2.57662 0.60995   2
  -1 -12  16 1.48533 0.83466   1
  -1 -12 -16 1.63002 0.61181   2
  -1 -12 -17 0.61050 0.59347   2
  -1 -12  17 1.03510 0.83459   1
  -1 -12 -18 0.70800 0.59451   2
  -1 -12  18 1.13419 0.79054   1
   1 -12  19-0.53407 0.81488   1
  -1 -12  19 1.52331 1.01503   1
  -1 -12 -19 0.33529 0.65530   2
  -1 -12  20 1.68432 0.90662   1
   1 -12  20 1.98995 0.67455   1
  -1 -12 -20 0.31298 0.66329   2
  -1 -12 -21 4.82439 0.73707   2
  -1 -12 -22-0.11796 0.68036   2
  -1 -12 -23 3.67020 0.75439   2
  -1 -12 -24 1.76826 0.73134   2
  -1 -12 -25 1.59753 0.76132   2
  -1 -12 -26-2.09113 0.77458   2
  -1 -12 -27-0.18925 0.72698   2
  -1 -12 -28-0.11148 0.78472   2
  -1 -12 -29 0.31409 0.84007   2
  -1 -13   0 11.2310 0.99872   2
  -1 -13   1 0.89894 0.84405   2
  -1 -13  -1 0.63550 0.73246   2
  -1 -13   2 14.2169 1.16971   2
  -1 -13  -2 11.5828 0.95328   2
  -1 -13  -3-0.70092 0.64129   2
  -1 -13   3 1.49726 0.93613   2
  -1 -13  -4 14.3120 1.01154   2
  -1 -13  -5 3.40364 0.64308   2
  -1  13   5 3.84609 1.14713   2
  -1 -13  -6 12.8489 0.91601   2
  -1  13   6 10.5331 1.30880   2
  -1  13   7-0.24113 0.99477   2
  -1 -13  -7 0.42962 0.59627   2
  -1 -13  -8 0.82407 0.55973   2
  -1  13   8-0.24856 0.95859   2
  -1 -13  -9 2.17468 0.58114   2
  -1  13   9 3.37340 0.89593   2
  -1 -13 -10 1.89362 0.58191   2
  -1 -13 -11 2.81374 0.62517   2
  -1 -13 -12 3.43963 0.59929   2
  -1 -13 -13 1.90997 0.62189   2
  -1 -13 -14 1.61676 0.64025   2
  -1 -13 -15 1.22084 0.62199   2
  -1 -13  16-1.06103 0.95520   1
  -1 -13 -16 1.27693 0.64201   2
  -1 -13 -17 0.68804 0.64710   2
  -1 -13  17-0.47668 0.93909   1
  -1 -13 -18 0.13405 0.61947   2
  -1 -13  18 1.16445 0.84921   1
   1 -13  19 0.70940 0.88384   1
  -1 -13 -19 1.21634 0.66032   2
  -1 -13  19 1.64735 0.93454   1
  -1 -13  20 0.39661 0.97603   1
  -1 -13 -20 1.59535 0.69436   2
  -1 -13 -21-0.34837 0.70314   2
  -1 -13 -22-0.02437 0.69392   2
  -1 -13 -23 1.53943 0.73931   2
  -1 -13 -24 2.31598 0.73496   2
  -1 -13 -25 0.84269 0.79148   2
  -1 -13 -26-1.92624 0.80428   2
  -1 -13 -27 0.85490 0.78625   2
  -1 -13 -28 1.66364 0.81190   2
  -1 -14   0 2.71257 0.84141   2
  -1 -14   1 8.63138 1.01131   2
  -1 -14  -1 7.76185 0.89114   2
  -1 -14   2 1.17144 0.93202   2
  -1 -14  -2 2.44124 0.72483   2
  -1 -14   3 4.60870 1.01322   2
  -1 -14  -3 4.07086 0.70874   2
  -1 -14  -4-0.51906 0.62097   2
  -1 -14  -5 0.08681 0.61856   2
  -1 -14  -6 3.13922 0.64490   2
  -1  14   6 5.54315 1.17661   2
  -1 -14  -7 1.79479 0.64182   2
  -1 -14  -8 3.97518 0.65275   2
  -1 -14  -9 10.8852 0.86555   2
  -1 -14 -10 6.38218 0.71957   2
  -1 -14 -11 6.81496 0.75126   2
  -1 -14 -12 2.61062 0.64256   2
  -1 -14 -13 5.70647 0.71752   2
  -1 -14 -14 2.51539 0.67101   2
  -1 -14 -15 1.55650 0.65675   2
  -1 -14 -16 3.77171 0.68231   2
  -1 -14  17 1.29283 1.00094   1
  -1 -14 -17 0.60332 0.70799   2
  -1 -14 -18 1.67361 0.67599   2
  -1 -14  18 2.28981 0.98564   1
  -1 -14 -19 2.25762 0.71886   2
  -1 -14  19 2.11828 0.83040   1
  -1 -14 -20-0.29504 0.70324   2
  -1 -14 -21 1.96109 0.74211   2
  -1 -14 -22 2.38120 0.69689   2
  -1 -14 -23 1.19667 0.73620   2
  -1 -14 -24-0.80256 0.76891   2
  -1 -14 -25 0.20952 0.81301   2
  -1 -14 -26 1.07182 0.77477   2
  -1 -14 -27 2.13134 0.83211   2
  -1 -14 -28-1.07146 0.86003   2
  -1 -15   0 3.07742 0.83374   2
  -1 -15  -1-0.37113 0.78885   2
  -1 -15   1 0.46241 0.90470   2
  -1 -15  -2 1.33628 0.71264   2
  -1 -15   2 1.37026 0.93914   2
  -1 -15  -3 1.03578 0.68097   2
  -1 -15   3 1.35801 0.99755   2
  -1 -15  -4 3.26936 0.68994   2
  -1 -15   4 3.62142 1.09897   2
  -1 -15  -5 3.42766 0.70421   2
  -1 -15  -6 2.39883 0.67144   2
  -1 -15  -7 0.70130 0.65687   2
  -1 -15  -8 0.02251 0.62361   2
  -1 -15  -9 2.71291 0.67979   2
  -1 -15 -10 4.46325 0.68062   2
  -1 -15 -11 0.81851 0.64982   2
  -1 -15 -12-0.21861 0.69334   2
  -1 -15 -13 1.58499 0.67653   2
  -1 -15 -14 0.25109 0.69095   2
  -1 -15 -15 3.24728 0.72107   2
  -1 -15 -16 2.41779 0.71836   2
  -1 -15 -17 0.34234 0.68931   2
  -1 -15 -18-1.58818 0.76468   2
  -1 -15 -19 2.52645 0.77567   2
  -1 -15 -20-0.89242 0.74542   2
  -1 -15 -21 0.18614 0.76600   2
  -1 -15 -22 0.46372 0.77634   2
  -1 -15 -23 0.53584 0.75790   2
  -1 -15 -24 0.41925 0.80278   2
  -1 -15 -25-0.23940 0.76233   2
  -1 -15 -26-0.02961 0.82914   2
  -1 -15 -27-0.27008 0.84736   2
  -1 -16   0 0.27943 0.84755   2
  -1 -16  -1 2.73383 0.83977   2
  -1 -16   1 3.25100 0.95993   2
  -1 -16   2-0.17706 0.95291   2
  -1 -16  -2 1.43985 0.73904   2
  -1 -16  -3 0.31198 0.70520   2
  -1 -16   3 0.09333 0.98043   2
  -1 -16  -4 3.25799 0.71959   2
  -1 -16   4 2.36773 1.08791   2
  -1 -16   5 1.38589 1.08776   2
  -1 -16  -5 1.00964 0.67643   2
  -1 -16  -6 1.19132 0.69417   2
  -1 -16  -7 0.13412 0.68571   2
  -1 -16  -8 1.05086 0.70679   2
  -1 -16  -9 0.49417 0.68045   2
  -1 -16 -10 0.84001 0.64090   2
  -1 -16 -11 1.66372 0.68311   2
  -1 -16 -12 1.09937 0.72790   2
  -1 -16 -13 1.56894 0.67193   2
  -1 -16 -14-0.06179 0.72746   2
  -1 -16 -15 3.25279 0.76101   2
  -1 -16 -16 0.82179 0.70484   2
  -1 -16 -17-0.55077 0.73099   2
  -1 -16 -18-0.45132 0.77185   2
  -1 -16 -19 0.45186 0.74253   2
  -1 -16 -20 0.44166 0.76415   2
  -1 -16 -21-0.08136 0.74601   2
  -1 -16 -22-0.12919 0.80228   2
  -1 -16 -23 0.59659 0.81881   2
  -1 -16 -24 0.88618 0.78880   2
  -1 -16 -25-0.17752 0.80916   2
  -1 -16 -26-0.37492 0.86062   2
  -1 -17   0-0.82947 0.90101   2
  -1 -17   1 1.68253 0.94475   2
  -1 -17  -1 1.95172 0.83953   2
  -1 -17   2 1.65753 0.94990   2
  -1 -17  -2 1.60195 0.76846   2
  -1 -17   3 1.13583 0.99280   2
  -1 -17  -3 1.98595 0.75134   2
  -1 -17  -4 1.76747 0.71274   2
  -1 -17   4 1.01920 1.09680   2
  -1 -17  -5 0.05222 0.71176   2
  -1 -17   5 0.58798 1.21319   2
  -1 -17  -6-0.29906 0.71936   2
  -1 -17  -7 1.77886 0.76636   2
  -1 -17  -8-0.12759 0.72560   2
  -1 -17  -9-0.03784 0.68457   2
  -1 -17 -10 2.33064 0.72739   2
  -1 -17 -11 1.92072 0.73360   2
  -1 -17 -12 1.46150 0.75054   2
  -1 -17 -13 0.70324 0.72999   2
  -1 -17 -14 0.97554 0.69227   2
  -1 -17 -15 0.06803 0.80179   2
  -1 -17 -16 3.61488 0.79386   2
  -1 -17 -17 2.79707 0.76525   2
  -1 -17 -18 0.77783 0.77462   2
  -1 -17 -19 1.26882 0.81107   2
  -1 -17 -20 0.50229 0.79300   2
  -1 -17 -21 1.91851 0.80752   2
  -1 -17 -22-0.30840 0.81636   2
  -1 -17 -23 1.98160 0.87579   2
  -1 -17 -24 2.58193 0.83275   2
  -1 -17 -25 0.81191 0.86576   2
  -1 -18   0 0.78531 0.91944   2
  -1 -18   1 1.39202 0.97289   2
  -1 -18  -1 1.86145 0.90258   2
  -1 -18   2-0.48797 1.01157   2
  -1 -18  -2 0.84097 0.83137   2
  -1 -18  -3 0.53976 0.80906   2
  -1 -18   3 1.10214 1.06067   2
  -1 -18  -4 6.08561 0.87000   2
  -1 -18   4 4.83183 1.18520   2
  -1 -18  -5-1.20352 0.76825   2
  -1 -18   5-0.41692 1.20924   2
  -1 -18   6 0.21127 1.26198   2
  -1 -18  -6 1.77959 0.75577   2
  -1 -18  -7 0.66592 0.77935   2
  -1 -18  -8-2.19002 0.78093   2
  -1 -18  -9-0.05323 0.75495   2
  -1 -18 -10-0.39854 0.75757   2
  -1 -18 -11 1.21546 0.73036   2
  -1 -18 -12 2.94769 0.79187   2
  -1 -18 -13 0.53047 0.75105   2
  -1 -18 -14 1.36791 0.76551   2
  -1 -18 -15-0.02810 0.78271   2
  -1 -18 -16-0.47713 0.78729   2
  -1 -18 -17 0.16627 0.75985   2
  -1 -18 -18-0.38366 0.77888   2
  -1 -18 -19-1.00956 0.87209   2
  -1 -18 -20 1.45495 0.84894   2
  -1 -18 -21 0.26572 0.84989   2
  -1 -18 -22 0.77624 0.78662   2
  -1 -18 -23-0.88269 0.87060   2
  -1 -18 -24 0.34215 0.88811   2
  -1 -19   0 0.82329 0.93538   2
  -1 -19  -1 0.89093 0.85695   2
  -1 -19   1-0.92526 0.94163   2
  -1 -19   2-1.26906 1.05740   2
  -1 -19  -2 0.63786 0.85725   2
  -1 -19   3 0.77742 1.12915   2
  -1 -19  -3 1.70779 0.84122   2
  -1 -19  -4 1.02967 0.79487   2
  -1 -19   4 0.72807 1.12168   2
  -1 -19  -5 1.42964 0.82373   2
  -1 -19   5-0.69440 1.19782   2
  -1 -19  -6 1.86001 0.77769   2
  -1 -19   6 2.91611 1.28121   2
  -1 -19   7 0.79830 1.32481   2
  -1 -19  -7 1.28746 0.77660   2
  -1 -19  -8 1.03125 0.81333   2
  -1 -19  -9 1.00640 0.81752   2
  -1 -19 -10 0.94732 0.76463   2
  -1 -19 -11 0.18003 0.79041   2
  -1 -19 -12 0.51837 0.79450   2
  -1 -19 -13-0.90947 0.84439   2
  -1 -19 -14 1.05433 0.77880   2
  -1 -19 -15 5.21722 0.86147   2
  -1 -19 -16-0.01495 0.82322   2
  -1 -19 -17 1.11856 0.80804   2
  -1 -19 -18 0.72723 0.84169   2
  -1 -19 -19 0.65846 0.85770   2
  -1 -19 -20-1.25725 0.86554   2
  -1 -19 -21-0.16839 0.80997   2
  -1 -19 -22-0.27861 0.88714   2
  -1 -20   0 2.73426 0.98825   2
  -1 -20  -1-0.26801 0.92135   2
  -1 -20   1-0.94619 0.99563   2
  -1 -20  -2-0.35450 0.88311   2
  -1 -20   2 1.02016 1.08382   2
  -1 -20   3 0.96420 1.14366   2
  -1 -20  -3 0.51155 0.82574   2
  -1 -20   4 0.89188 1.15437   2
  -1 -20  -4-0.04564 0.86538   2
  -1 -20  -5 1.67504 0.83416   2
  -1 -20   5-0.13729 1.18991   2
  -1 -20   6-2.08935 1.25552   2
  -1 -20  -6-0.34700 0.84110   2
  -1 -20   7 1.73966 1.35600   2
  -1 -20  -7 0.33030 0.81484   2
  -1 -20   8 0.87724 1.43000   2
  -1 -20  -8 0.66686 0.83958   2
  -1 -20  -9 0.49776 0.80473   2
  -1 -20 -10 0.99176 0.84050   2
  -1 -20 -11-0.02897 0.80752   2
  -1 -20 -12 1.16673 0.83394   2
  -1 -20 -13 0.90421 0.82589   2
  -1 -20 -14 0.18709 0.77935   2
  -1 -20 -15-0.55162 0.78948   2
  -1 -20 -16 0.52999 0.90369   2
  -1 -20 -17-0.30301 0.85386   2
  -1 -20 -18-0.21642 0.83254   2
  -1 -20 -19-0.64112 0.85073   2
  -1 -20 -20-1.22130 0.91045   2
  -1 -20 -21 2.07484 0.92029   2
  -1 -21   0 3.98159 1.02232   2
  -1 -21   1 0.72043 1.02864   2
  -1 -21  -1 0.66386 0.97190   2
  -1 -21  -2 2.05683 0.85707   2
  -1 -21   2 1.39987 1.03336   2
  -1 -21  -3 1.11277 0.87224   2
  -1 -21   3-1.60051 1.15348   2
  -1 -21  -4-0.60497 0.88789   2
  -1 -21   4 3.37808 1.16268   2
  -1 -21  -5 1.07356 0.85906   2
  -1 -21   5 1.95017 1.24635   2
  -1 -21  -6-0.58545 0.90132   2
  -1 -21   6 1.56232 1.22292   2
  -1 -21   7-0.15436 1.41169   2
  -1 -21  -7 1.83106 0.89982   2
  -1 -21  -8 1.76822 0.86850   2
  -1 -21   8 0.34677 1.41595   2
  -1 -21  -9 0.67395 0.85883   2
  -1 -21   9-1.01415 1.52482   2
  -1 -21 -10 0.06095 0.84364   2
  -1 -21 -11 0.92224 0.80918   2
  -1 -21 -12-0.57752 0.86500   2
  -1 -21 -13-1.51538 0.89681   2
  -1 -21 -14-0.95711 0.85213   2
  -1 -21 -15 1.52783 0.87180   2
  -1 -21 -16 0.34315 0.90760   2
  -1 -21 -17 0.85869 0.89669   2
  -1 -21 -18 1.35426 0.86906   2
  -1 -21 -19-0.64756 0.87556   2
  -1 -22   0 0.98549 1.03183   2
  -1 -22   1 0.92609 1.04831   2
  -1 -22  -1 1.11530 0.99075   2
  -1 -22   2 1.20761 1.11907   2
  -1 -22  -2 2.20101 0.97698   2
  -1 -22  -3 0.30225 0.93837   2
  -1 -22   3 2.44542 1.19385   2
  -1 -22  -4-1.73116 0.92793   2
  -1 -22   4-0.86718 1.25699   2
  -1 -22  -5 0.75068 0.89647   2
  -1 -22   5-0.78406 1.26712   2
  -1 -22   6 0.74472 1.29891   2
  -1 -22  -6 0.85484 0.89982   2
  -1 -22  -7 0.19635 0.89657   2
  -1 -22   7 2.18391 1.38216   2
  -1 -22   8 2.14543 1.43735   2
  -1 -22  -8 0.04861 0.88217   2
  -1 -22   9-1.35370 1.44657   2
  -1 -22  -9-2.32768 0.88015   2
  -1 -22  10 3.56260 1.53545   2
  -1 -22 -10-0.66769 0.85477   2
  -1 -22 -11-0.15752 0.84109   2
  -1 -22 -12 0.25998 0.88411   2
  -1 -22 -13 0.82961 0.89841   2
  -1 -22 -14-0.74209 0.85444   2
  -1 -22 -15-1.17408 0.83681   2
  -1 -22 -16-2.11957 0.90279   2
  -1 -22 -17-0.95631 0.91780   2
  -1 -23   0 1.16548 1.03599   2
  -1 -23  -1 0.79595 0.94237   2
  -1 -23   1 1.54094 1.07074   2
  -1 -23  -2-0.71001 0.94030   2
  -1 -23   2 1.72903 1.11397   2
  -1 -23  -3-1.30177 0.90740   2
  -1 -23   3-1.94174 1.13478   2
  -1 -23   4-1.65841 1.20860   2
  -1 -23  -4 0.38420 0.92429   2
  -1 -23  -5 0.24130 0.89619   2
  -1 -23   5 1.82741 1.28870   2
  -1 -23   6 1.53319 1.27489   2
  -1 -23  -6 1.11482 0.89567   2
  -1 -23  -7-0.42376 0.93010   2
  -1 -23   7-2.58504 1.39182   2
  -1 -23   8 1.53308 1.41741   2
  -1 -23  -8 1.40015 0.91868   2
  -1 -23   9 3.52070 1.51563   2
  -1 -23  -9-0.41544 0.92559   2
  -1 -23 -10 0.18202 0.90924   2
  -1 -23  10-2.35154 1.59039   2
  -1 -23  11-0.34513 1.71514   2
  -1 -23 -11 0.42617 0.89327   2
  -1 -23 -12 0.01689 0.91494   2
  -1 -23 -13-0.37925 0.92530   2
  -1 -23 -14-0.90110 0.85423   2
  -1 -23 -15 0.32920 0.89794   2
  -1 -24   0 0.09799 1.04050   2
  -1 -24   1-2.51813 1.12321   2
  -1 -24  -1-0.65441 0.99710   2
  -1 -24   2 0.54213 1.06399   2
  -1 -24  -2 0.69215 0.98459   2
  -1 -24  -3 2.47580 1.02068   2
  -1 -24   3-0.46401 1.18796   2
  -1 -24   4 0.27231 1.21551   2
  -1 -24  -4-0.80356 1.04283   2
  -1 -24   5 3.35940 1.31452   2
  -1 -24  -5-0.30491 0.98842   2
  -1 -24   6 2.80832 1.35241   2
  -1 -24  -6 0.53461 0.96292   2
  -1 -24  -7 0.66464 0.94119   2
  -1 -24   7 0.84410 1.40736   2
  -1 -24  -8 2.31460 0.93907   2
  -1 -24   8 2.11323 1.49932   2
  -1 -24   9-0.31663 1.48671   2
  -1 -24  -9 0.31362 0.92155   2
  -1 -24  10 1.86951 1.63485   2
  -1 -24 -10 2.44688 0.91772   2
  -1 -24 -11-0.98767 0.91646   2
  -1 -24  11-2.41954 1.60741   2
  -1 -24  12 1.30619 1.59954   2
  -1 -24 -12-0.57847 0.94411   2
  -1 -24  13 0.73546 1.71662   2
  -1 -24 -13-0.32172 0.94286   2
  -1 -25   0 0.76628 1.02523   2
  -1 -25  -1 0.67321 1.02017   2
  -1 -25   1-0.14394 1.10573   2
  -1 -25  -2 1.86577 1.03576   2
  -1 -25   2-0.85387 1.12193   2
  -1 -25  -3 0.20675 0.96670   2
  -1 -25   3 1.62746 1.21368   2
  -1 -25  -4 1.33389 0.98135   2
  -1 -25   4-0.88966 1.23948   2
  -1 -25  -5-0.07440 0.98898   2
  -1 -25   5 0.79704 1.24959   2
  -1 -25  -6 1.16107 0.99793   2
  -1 -25   6-1.17931 1.25956   2
  -1 -25  -7 0.34484 0.91743   2
  -1 -25   7-1.33686 1.39169   2
  -1 -25  -8-0.73324 0.92278   2
  -1 -25   8-2.90332 1.46775   2
  -1 -25   9 0.92142 1.48211   2
  -1 -25  -9 0.50678 1.00830   2
  -1 -26   0-0.12144 1.07877   2
  -1 -26   1-0.37541 1.09135   2
  -1 -26  -1-0.53119 1.03634   2
  -1 -26   2 1.04736 1.14311   2
  -1 -26  -2 0.23384 1.04644   2
  -1 -26   3 0.08959 1.15723   2
   2   0   0 26.2891 1.59385   3
  -2   0   0 35.4690 1.54919   1
  -2   0   0 21.1667 1.57655   3
   2   0  -1-0.04351 0.24562   1
  -2   0  -1 0.01865 0.29153   1
  -2   0  -1-0.33730 0.56775   3
   2   0  -1 0.92445 0.54689   3
   2   0   1-0.02014 0.52872   3
  -2   0   1 0.21766 0.35503   1
   2   0  -2 0.14133 0.55834   3
  -2   0   2 0.36003 0.40233   1
  -2   0  -2 0.54710 0.28506   1
   2   0  -2 0.03979 0.32941   1
   2   0   3 1.06072 0.25227   1
  -2   0  -3 0.50299 0.14887   2
  -2   0   3 0.44304 0.15664   2
  -2   0  -3 0.39632 0.28039   1
   2   0  -3 0.36773 0.60124   3
   2   0  -3 0.56589 0.39662   1
  -2   0  -4 1.82005 0.29335   1
  -2   0  -4 1.48997 0.19919   2
   2   0   4 2.22354 0.30057   1
   2   0  -4 2.43449 0.63076   3
   2   0  -4 1.65590 0.52013   1
  -2   0   4 0.80434 0.21678   2
  -2   0   4 2.96225 0.63832   3
  -2   0   5 0.68108 0.23511   2
   2   0   5-0.03576 0.60243   3
  -2   0  -5 0.20295 0.19694   2
   2   0   5 0.17897 0.23816   2
   2   0  -5 1.63848 0.62167   3
  -2   0   5 0.12472 0.61116   3
   2   0  -5-0.24517 0.50069   1
   2   0   6 5.00036 0.65123   3
   2   0   6 4.76750 0.36298   2
  -2   0   6 4.95671 0.36257   2
   2   0  -6 3.74246 0.61130   3
  -2   0   6 4.02058 0.60382   3
   2   0  -6 5.10911 0.54513   1
  -2   0   6 5.69382 0.61236   1
  -2   0  -6 5.15275 0.35318   2
  -2   0  -7 0.05293 0.23742   2
   2   0   7-0.01312 0.59584   3
  -2   0   7-0.14663 0.26552   2
   2   0  -7 0.50539 0.46752   1
  -2   0   7 0.29518 0.50485   3
   2   0   7 0.29078 0.25929   2
  -2   0  -8 10.4047 0.60432   2
  -2   0   8 11.0985 0.62775   2
   2   0   8 9.65818 0.81774   3
   2   0  -8 11.5775 0.73197   1
  -2   0   8 7.89426 0.68883   3
   2   0   8 10.2980 0.61895   2
  -2   0   9-0.07274 0.31591   2
   2   0  -9-0.41777 0.47081   1
  -2   0  -9 0.06383 0.26691   2
   2   0   9 0.39921 0.30546   2
  -2   0   9 0.28797 0.45116   3
  -2   0 -10-0.00701 0.29957   2
   2   0  10-0.12324 0.62007   3
   2   0 -10-0.26244 0.48565   1
   2   0  10 0.51929 0.32562   2
  -2   0  10-0.28979 0.32050   2
  -2   0 -11-0.14467 0.30615   2
   2   0 -11 0.28954 0.45817   1
   2   0  11 0.12576 0.61604   3
  -2   0  11-0.08532 0.31335   2
   2   0  11 0.62303 0.33403   2
   2   0  12 4.36786 0.67535   3
   2   0  12 4.11719 0.42176   2
   2   0 -12 4.32033 0.52570   1
  -2   0 -12 4.72270 0.40167   2
  -2   0  12 3.64229 0.41704   2
   2   0 -13-0.27704 0.51998   1
   2   0  13 0.26766 0.58568   3
  -2   0 -13 0.01787 0.36678   2
  -2   0  13 0.25746 0.34738   2
   2   0  13 1.03051 0.37261   2
   2   0 -14 7.61887 0.57293   2
   2   0 -14 8.38042 0.71987   1
  -2   0  14 7.85963 0.58983   2
   2   0  14 9.04977 0.59384   2
   2   0  14 10.0052 0.73138   3
  -2   0 -14 8.99390 0.57905   2
   2   0 -15-0.79621 0.51573   1
   2   0  15-0.68444 0.37830   2
   2   0 -15-0.25521 0.35364   2
  -2   0  15 0.16408 0.37122   2
   2   0  15-0.58709 0.52343   3
  -2   0 -15-0.51830 0.34683   2
   2   0 -16 9.17920 0.65846   2
   2   0 -16 9.52733 0.76855   1
  -2   0  16 9.95655 0.65938   2
   2   0  16 9.87918 0.74127   3
   2   0  16 10.3650 0.66719   2
  -2   0 -16 10.5512 0.65489   2
  -2   0  17-0.00546 0.37366   2
   2   0  17-0.12367 0.37993   2
  -2   0 -17-0.25713 0.37137   2
   2   0 -17-0.45405 0.58444   1
   2   0 -17-0.55334 0.39492   2
  -2   0  18 26.8884 1.56687   2
   2   0 -18 28.1013 1.58075   2
   2   0  18 28.8111 1.57253   2
  -2   0 -18 31.5751 1.58126   2
   2   0 -18 28.3791 1.63263   1
   2   0 -19-0.47247 0.44295   2
   2   0 -19 0.54139 0.59042   1
   2   0  19 0.03009 0.40320   2
  -2   0 -19 0.03428 0.43739   2
   2   0 -20 12.4396 0.81072   2
   2   0 -20 11.8328 0.92866   1
  -2   0 -20 12.4803 0.81521   2
   2   0 -21 1.01718 0.46775   2
   2   0 -21-0.46041 0.65203   1
  -2   0 -21 0.73171 0.46340   2
  -2   0 -22 2.64420 0.53902   2
   2   0 -22 4.75625 0.55842   2
   2   0 -22 2.72643 0.74089   1
   2   0 -23 0.18544 0.72377   1
   2   0 -23 1.75324 0.58216   2
  -2   0 -23 0.06080 0.54149   2
   2   0 -24 0.59340 0.56796   2
  -2   0 -24 0.46568 0.55927   2
   2   0 -25 0.70146 0.62640   2
  -2   0 -25 0.58407 0.63787   2
   2   0 -26 4.41837 0.71096   2
  -2   0 -26 3.50753 0.70591   2
  -2   0 -27 0.26206 0.79598   2
   2   0 -27 0.70001 0.78285   2
  -2   0 -28 3.01053 0.75056   2
   2   0 -28 3.85231 0.77995   2
  -2   0 -29 1.06693 0.73744   2
   2   0 -29 1.10827 0.73649   2
   2   0 -30 2.90781 0.76108   2
  -2   0 -30-0.18230 0.74806   2
  -2   0 -31-0.81306 0.76637   2
   2   0 -31-1.51404 0.77451   2
  -2   0 -32 1.60133 0.80284   2
   2   0 -32 1.97402 0.81601   2
   2   0 -33 0.68655 0.78803   2
  -2   0 -33 1.48848 0.78228   2
  -2  -1   0 38.4480 1.91476   3
  -2  -1   0 38.4134 1.84335   1
   2   1   0 31.6935 1.89561   3
   2   1   0 32.3096 1.83121   1
   2   1  -1 96.7814 4.89280   1
   2   1  -1 79.1373 4.91700   3
  -2  -1   1 81.4195 4.92507   3
  -2  -1  -1 100.762 4.89125   1
   2   1   1 95.9601 4.92179   3
  -2  -1  -1 100.673 4.92883   3
  -2  -1   1 94.4777 4.89959   1
  -2   1   2 50.2706 2.80056   2
  -2  -1  -2 52.2413 2.81617   1
  -2  -1   2 50.6621 2.83362   1
   2   1  -2 58.6332 2.82741   1
  -2  -1  -2 56.4277 2.79974   2
  -2  -1   2 54.9627 2.79763   2
  -2  -1  -2 53.5435 2.89289   3
  -2  -1  -3 141.719 7.51007   1
   2  -1   3 146.292 7.51107   1
  -2   1  -3 147.521 7.50141   2
  -2  -1   3 142.571 7.50133   2
  -2  -1  -3 146.439 7.50239   2
  -2  -1  -3 145.868 7.55448   3
  -2   1   3 142.719 7.50379   2
   2   1  -3 149.844 7.52160   1
  -2  -1   4 438.449 22.1359   3
  -2  -1  -4 434.573 22.1151   1
  -2  -1   4 421.380 22.1105   2
   2  -1   4 386.837 22.1097   2
  -2   1   4 436.560 22.1125   2
  -2  -1  -4 477.105 22.1494   3
   2  -1  -4 419.899 22.1336   1
   2  -1   4 431.319 22.1138   1
  -2   1  -4 432.945 22.1110   2
  -2  -1  -4 443.755 22.1122   2
   2   1  -4 455.514 22.1285   1
   2   1   5 135.409 7.44872   3
   2   1   5 127.146 7.40208   2
  -2   1  -5 174.068 7.40633   2
  -2  -1  -5 137.686 7.45221   3
  -2  -1  -5 146.294 7.40145   2
   2  -1  -5 149.773 7.42895   1
   2   1  -5 148.422 7.42287   1
  -2  -1   5 143.989 7.40098   2
  -2  -1   5 149.986 7.43715   3
  -2  -1  -5 142.247 7.40233   1
   2  -1  -5 111.424 7.42366   3
   2  -1   5 136.546 7.40031   2
  -2   1   5 147.388 7.40359   2
  -2   1   6 2.47929 0.29829   2
  -2   1  -6 1.60080 0.25284   2
   2  -1  -6 2.38992 0.50427   1
  -2  -1   6 0.91781 0.59643   1
  -2  -1   6 0.75161 0.60439   3
   2   1   6 1.28983 0.27650   2
  -2  -1  -6 1.45802 0.59959   3
   2   1  -6 1.27714 0.42816   1
  -2  -1   6 1.79335 0.26926   2
  -2  -1  -6 1.87323 0.25857   2
   2  -1  -6 0.62492 0.57473   3
   2   1   6 0.88359 0.68204   3
   2  -1   6 1.30660 0.26541   2
  -2   1   7 24.1926 1.29466   2
   2   1  -7 24.0512 1.33937   1
  -2  -1   7 25.7823 1.38683   1
   2  -1  -7 29.1581 1.37197   1
  -2  -1  -7 26.7119 1.28901   2
  -2  -1   7 22.2327 1.28830   2
   2  -1   7 22.9744 1.28546   2
  -2  -1  -7 24.0516 1.44658   3
   2   1   7 26.1402 1.41659   3
  -2   1  -7 24.2973 1.28296   2
  -2  -1   7 19.3045 1.39095   3
   2   1   7 23.4516 1.28907   2
  -2   1  -8 59.6249 3.08762   2
  -2  -1   8 59.7314 3.09151   2
  -2  -1   8 60.6523 3.13739   1
  -2  -1  -8 61.2515 3.08920   2
   2   1   8 55.9931 3.09076   2
   2  -1  -8 62.9740 3.13142   1
   2   1   8 61.5337 3.14991   3
  -2  -1   8 60.5088 3.12943   3
  -2   1   8 59.8309 3.09094   2
   2  -1   8 56.1235 3.08856   2
   2   1  -8 57.8594 3.11834   1
  -2  -1   9 10.9052 0.64381   2
  -2  -1   9 9.90901 0.80208   1
   2   1   9 11.8639 0.80293   3
  -2   1   9 10.6169 0.64448   2
  -2   1  -9 10.3164 0.62235   2
   2  -1   9 11.2422 0.64733   2
   2   1   9 10.6916 0.65527   2
  -2  -1   9 10.2164 0.77383   3
   2   1  -9 10.2801 0.70958   1
  -2  -1  -9 11.3376 0.63902   2
   2  -1  -9 10.0178 0.73608   1
  -2   1  10 3.46681 0.37745   2
   2  -1  10 3.61791 0.36294   2
  -2  -1  10 2.33070 0.52553   3
   2   1 -10 2.26345 0.45065   1
   2  -1 -10 3.42264 0.54255   1
  -2  -1  10 1.83084 0.60722   1
   2   1  10 4.18125 0.39378   2
  -2   1 -10 2.98053 0.33336   2
  -2  -1 -10 3.79376 0.35516   2
   2   1  10 2.41882 0.60101   3
  -2  -1  10 2.86641 0.36621   2
  -2   1 -11 29.0634 1.54637   2
   2   1  11 30.3022 1.61511   3
   2   1 -11 26.0092 1.60522   1
  -2   1  11 31.4012 1.55659   2
   2  -1 -11 28.6453 1.62889   1
  -2  -1 -11 29.0786 1.54682   2
  -2  -1  11 28.1758 1.64184   1
  -2  -1  11 27.9517 1.54458   2
  -2  -1  11 27.3131 1.60014   3
   2   1  11 28.9089 1.55511   2
   2  -1  11 29.3533 1.54793   2
  -2   1 -12 9.10422 0.57868   2
  -2  -1  12 7.91023 0.66588   3
  -2   1  12 8.57935 0.58417   2
  -2  -1 -12 8.12896 0.57723   2
   2   1  12 9.33580 0.58717   2
   2  -1 -12 7.75007 0.70006   1
   2   1 -12 8.83811 0.66348   1
  -2  -1  12 8.49924 0.57420   2
   2  -1  12 8.66405 0.56785   2
  -2   1 -13 62.0447 3.33971   2
   2  -1 -13 64.7467 3.38663   1
  -2  -1 -13 66.0476 3.34448   2
   2  -1  13 59.5460 3.39228   3
   2  -1  13 66.8122 3.34321   2
  -2  -1  13 62.1869 3.35246   3
  -2   1  13 60.8243 3.34213   2
   2   1 -13 65.6216 3.37001   1
   2   1  13 63.9701 3.34253   2
  -2  -1  13 65.0904 3.34243   2
   2  -1  14 20.3232 1.12705   2
   2   1  14 20.9022 1.13128   2
  -2   1  14 20.4438 1.13193   2
   2  -1  14 17.2945 1.17889   3
  -2  -1  14 20.9050 1.12684   2
   2  -1 -14 21.3971 1.22325   1
  -2  -1 -14 20.8270 1.13054   2
  -2  -1  14 17.5379 1.15685   3
  -2   1 -14 20.7302 1.12520   2
   2   1 -14 19.8615 1.19826   1
   2  -1 -15 19.5045 1.08003   1
  -2  -1  15 15.5822 0.89216   2
   2  -1 -15 14.4776 0.90189   2
   2   1 -15 15.4112 0.97665   1
  -2   1  15 15.1747 0.89704   2
   2  -1  15 17.5596 0.90184   2
  -2  -1 -15 16.7753 0.90040   2
   2   1  15 15.8436 0.89589   2
  -2  -1 -15 15.3937 0.84450   1
   2  -1  15 14.0524 0.97290   3
   2   1 -15 12.9676 0.88490   2
  -2   1 -15 15.5213 0.88971   2
  -2  -1  15 13.0515 0.87350   3
  -2  -1 -16-0.01303 0.26203   1
  -2   1  16-0.21311 0.37263   2
   2   1  16 0.46555 0.37833   2
  -2   1 -16-0.12836 0.36888   2
   2  -1 -16-0.50014 0.38043   2
  -2  -1  16 0.59472 0.37461   2
   2   1 -16 0.11543 0.35541   2
   2  -1  16 0.61661 0.37208   2
   2  -1  16-0.76200 0.59295   3
   2   1 -16-1.02501 0.50419   1
   2  -1 -16-0.70676 0.57212   1
  -2  -1 -16 0.65047 0.39842   2
   2   1 -17 4.80051 0.47486   2
  -2  -1  17 4.96530 0.47497   2
   2   1  17 5.10717 0.47804   2
   2  -1  17 5.19348 0.64351   3
   2  -1 -17 5.24027 0.62802   1
  -2   1 -17 4.83842 0.48709   2
  -2  -1 -17 4.06269 0.35214   1
   2  -1  17 5.84179 0.49360   2
   2  -1 -17 6.15576 0.49477   2
  -2   1  17 5.22086 0.47326   2
  -2  -1 -17 6.13424 0.52080   2
   2   1 -17 5.16537 0.60831   1
   2   1 -18 2.00919 0.44826   2
   2  -1  18 2.84786 0.57033   3
  -2   1 -18 2.11147 0.44054   2
  -2   1  18 2.64409 0.40910   2
   2   1  18 2.46509 0.43071   2
   2  -1 -18 2.46141 0.61051   1
   2  -1 -18 2.59717 0.44419   2
  -2  -1  18 3.33471 0.42983   2
   2  -1  18 3.49217 0.45033   2
   2   1 -18 1.63782 0.56839   1
  -2  -1 -18 3.12615 0.46202   2
  -2   1 -19 13.0854 0.76677   2
   2   1 -19 10.6943 0.84108   1
  -2  -1 -19 11.3603 0.75695   2
   2   1 -19 10.7029 0.76114   2
   2  -1 -19 10.8907 0.90252   1
   2  -1  19 9.59109 0.78794   3
   2  -1 -19 11.0704 0.75270   2
  -2  -1 -20 4.46068 0.52376   2
   2   1 -20 6.25914 0.64388   1
  -2   1 -20 5.44476 0.55606   2
   2  -1 -20 5.15930 0.53091   2
   2   1 -20 5.95536 0.56862   2
   2  -1 -20 4.88541 0.70519   1
   2  -1  20 3.05492 0.56934   3
  -2  -1 -21 7.19361 0.64583   2
   2   1 -21 7.87852 0.77181   1
   2  -1 -21 8.72023 0.66019   2
   2   1 -21 9.17066 0.70174   2
   2  -1 -21 7.13086 0.81901   1
  -2   1 -21 8.20575 0.68303   2
  -2  -1 -22 0.65361 0.52129   2
   2  -1 -22 0.46560 0.50611   2
  -2   1 -22 0.13699 0.55692   2
   2   1 -22 0.53477 0.70371   1
   2  -1 -22 0.36963 0.71255   1
   2   1 -22 0.44053 0.56014   2
   2   1 -23 5.18026 0.68064   2
  -2  -1 -23 4.02850 0.62122   2
  -2   1 -23 5.62900 0.69788   2
   2  -1 -23 2.99619 0.80333   1
   2  -1 -23 3.92952 0.61686   2
   2   1 -23 4.30709 0.78639   1
  -2   1 -24 1.30123 0.63151   2
  -2  -1 -24 0.54916 0.54931   2
   2  -1 -24 0.40752 0.53993   2
   2   1 -24 1.62564 0.63700   2
   2  -1 -25 0.14800 0.59767   2
  -2   1 -25-1.55592 0.63025   2
  -2  -1 -25 0.44159 0.56365   2
   2   1 -25 1.03371 0.65355   2
   2  -1 -26 17.9380 1.09647   2
  -2  -1 -26 16.4459 1.09705   2
  -2   1 -26 14.2750 1.08215   2
   2   1 -26 16.0868 1.09165   2
   2   1 -27 0.71247 0.66345   2
  -2  -1 -27 2.29387 0.68988   2
  -2   1 -27 1.03867 0.66445   2
   2  -1 -27 0.61944 0.67942   2
   2  -1 -28 2.34173 0.65522   2
  -2  -1 -28 1.25657 0.67100   2
   2   1 -28 2.66559 0.68296   2
  -2   1 -28-0.22935 0.68356   2
   2  -1 -29 0.76176 0.77934   2
   2   1 -29 2.20066 0.70332   2
  -2  -1 -29 0.16222 0.76644   2
  -2   1 -29 0.50794 0.69711   2
   2  -1 -30 4.18541 0.88128   2
   2   1 -30 2.79875 0.74439   2
  -2  -1 -30 3.61457 0.86982   2
  -2   1 -30 4.13025 0.76580   2
  -2   1 -31 1.66717 0.77115   2
  -2  -1 -31 1.62149 0.85169   2
   2  -1 -31-0.56429 0.84923   2
   2   1 -31 1.36186 0.79487   2
  -2   1 -32 1.22859 0.79861   2
   2  -1 -32-0.54626 0.81414   2
  -2  -1 -32-0.82588 0.81069   2
   2   1 -32-0.38585 0.78029   2
  -2  -1 -33-0.77466 0.85287   2
   2   1 -33 0.06825 0.84723   2
   2  -1 -33 0.27226 0.81753   2
  -2   1 -33 0.11097 0.85730   2
  -2  -2   0 26.4476 1.51705   1
  -2  -2   0 29.8402 1.51389   2
   2   2  -1 31.3513 1.64738   1
  -2  -2  -1 31.4380 1.66304   1
  -2  -2   1 27.0198 1.65987   1
  -2  -2  -1 33.6631 1.62829   2
  -2   2   1 28.9438 1.64506   2
  -2  -2  -2 319.314 15.6852   2
   2   2  -2 287.360 15.6952   1
  -2  -2   2 272.655 15.6959   1
  -2   2   2 313.407 15.6872   2
   2   2  -3 134.972 8.00899   1
  -2   2   3 153.162 8.00360   2
  -2  -2  -3 164.501 8.00323   2
  -2  -2  -3 179.393 8.05376   3
   2   2  -4 84.5952 4.07993   1
  -2  -2   4 76.7644 4.04593   2
  -2  -2  -4 86.5501 4.05033   2
   2   2   4 73.5181 4.04985   2
  -2   2   4 81.7013 4.05115   2
   2  -2   4 69.6342 4.04462   2
  -2  -2  -4 90.8139 4.13533   3
   2   2   5 0.07991 0.28523   2
   2   2  -5 0.13633 0.46761   1
  -2  -2   5 0.44533 0.28597   2
  -2   2   5 0.44883 0.29699   2
  -2  -2  -5 0.33407 0.24250   2
   2  -2   5 0.55341 0.26104   2
  -2  -2  -5-0.74532 0.73571   3
  -2  -2  -6 32.7764 1.65052   2
   2   2  -6 30.4908 1.68271   1
  -2  -2   6 32.1125 1.64698   2
   2   2   6 28.5215 1.65476   2
  -2   2   6 29.9047 1.65839   2
  -2  -2   6 34.8673 1.71983   1
  -2  -2  -6 32.4497 1.80457   3
   2  -2   6 31.2398 1.64660   2
   2   2  -7 57.0392 3.13920   1
  -2  -2  -7 61.8539 3.11850   2
  -2  -2  -7 69.4242 3.19788   3
  -2  -2   7 63.1020 3.16273   1
   2  -2   7 58.9127 3.11502   2
  -2   2  -7 60.1682 3.11543   2
  -2   2   7 58.0363 3.12068   2
   2   2   7 57.6679 3.11963   2
  -2  -2   7 59.5998 3.11466   2
  -2   2   8 2.84358 0.36354   2
   2   2  -8 3.36293 0.44285   1
  -2  -2   8 2.85175 0.55133   1
   2  -2   8 3.16283 0.32903   2
  -2   2  -8 2.60018 0.32113   2
  -2  -2   8 2.93792 0.33260   2
  -2  -2  -8 3.11514 0.32514   2
  -2  -2  -8 3.43567 0.73526   3
   2   2   8 3.18186 0.36255   2
   2  -2   9 27.0843 1.49756   2
   2   2   9 26.7955 1.50672   2
  -2   2   9 27.9680 1.50453   2
  -2  -2  -9 26.9227 1.64094   3
  -2  -2   9 28.9449 1.57100   1
  -2  -2  -9 29.4555 1.49724   2
  -2   2  -9 27.9072 1.49347   2
  -2  -2   9 27.9716 1.49930   2
   2   2  -9 29.7849 1.54092   1
  -2   2 -10 5.45841 0.43476   2
   2   2  10 6.83476 0.47949   2
   2   2 -10 5.45037 0.54303   1
   2  -2  10 7.39503 0.46728   2
  -2  -2 -10 3.96758 0.62269   3
  -2  -2  10 5.75762 0.46295   2
  -2  -2  10 7.54522 0.66751   1
  -2  -2 -10 6.96017 0.45954   2
  -2   2  10 6.64874 0.47961   2
  -2  -2  11 3.15243 0.36238   2
  -2   2 -11 3.23546 0.38248   2
   2  -2  11 3.60293 0.37016   2
   2   2 -11 3.19864 0.48187   1
  -2  -2  11 2.90601 0.58897   1
   2   2  11 3.72913 0.40785   2
  -2   2  11 3.28314 0.39087   2
  -2  -2 -11 2.67831 0.37094   2
  -2   2 -12 2.26317 0.36630   2
  -2  -2  12 2.28631 0.62329   1
   2  -2  12 3.03500 0.37998   2
  -2  -2  12 2.14846 0.37539   2
   2   2 -12 1.43577 0.47294   1
  -2   2  12 2.15073 0.37919   2
   2  -2 -12 3.74819 0.57199   1
  -2  -2 -12 2.76140 0.37513   2
   2   2  12 3.56050 0.39642   2
  -2  -2  13 0.00605 0.58175   1
   2   2 -13-0.69917 0.47050   1
   2  -2 -13 0.89018 0.57379   1
  -2  -2 -13 0.08287 0.39433   2
  -2   2 -13-0.25508 0.38215   2
  -2  -2  13-0.53475 0.36677   2
   2   2  13 0.62249 0.38713   2
   2  -2  13 0.89738 0.38225   2
  -2   2  13-0.05047 0.39350   2
   2  -2  14 29.4924 1.49319   2
  -2  -2  14 29.3059 1.49097   2
  -2   2 -14 27.5454 1.49123   2
   2   2  14 26.5857 1.49412   2
   2   2 -14 23.4489 1.48646   2
   2  -2 -14 25.1123 1.48921   2
   2  -2 -14 26.6853 1.58392   1
   2   2 -14 25.7756 1.51554   1
  -2  -2  14 28.7374 1.58113   1
  -2   2  14 28.3209 1.49536   2
  -2  -2 -14 30.4303 1.49860   2
  -2  -2 -15 2.41193 0.39765   2
   2  -2 -15 2.71921 0.63014   1
   2   2 -15 1.26110 0.39119   2
  -2   2 -15 1.83136 0.38938   2
  -2  -2  15 1.52849 0.48193   3
   2  -2  15 2.05896 0.38242   2
  -2  -2  15 2.18596 0.38516   2
   2  -2 -15 1.93892 0.37932   2
   2   2 -15 1.15528 0.46572   1
  -2   2  15 2.38149 0.39830   2
   2   2  15 2.70217 0.41216   2
   2  -2 -16 6.36279 0.52319   2
   2   2 -16 6.71732 0.53144   2
   2   2  16 5.27933 0.52859   2
   2   2 -16 6.17294 0.60914   1
  -2   2 -16 7.51668 0.54313   2
  -2  -2  16 6.00391 0.58479   3
  -2  -2 -16 6.56172 0.52834   2
  -2   2  16 5.71025 0.54271   2
  -2  -2  16 6.00580 0.50148   2
   2  -2  16 6.75390 0.51144   2
   2  -2 -16 5.43729 0.68571   1
   2   2 -17 1.00527 0.40977   2
   2  -2 -17 0.37036 0.36300   2
   2  -2 -17 1.44142 0.62041   1
  -2   2  17 0.71645 0.39987   2
  -2   2 -17 0.61480 0.43270   2
   2  -2  17 0.31297 0.37608   2
  -2  -2  17 0.27954 0.37740   2
  -2  -2 -17 0.74670 0.39597   2
   2   2  17 0.34223 0.41698   2
  -2  -2  17 0.67155 0.44348   3
   2   2 -17 0.54500 0.57291   1
  -2  -2  18 0.42677 0.41974   3
   2  -2  18 1.09389 0.53478   3
  -2  -2 -18 0.36642 0.40933   2
   2  -2  18 0.22381 0.42044   2
   2  -2 -18-0.12231 0.41659   2
   2   2 -18-0.98657 0.66448   1
   2   2 -18 0.12385 0.39917   2
  -2  -2 -18 0.63663 0.36380   1
  -2  -2  18 0.20972 0.38875   2
  -2   2 -18-0.09265 0.41787   2
  -2   2  18 0.85023 0.40855   2
   2   2  18 0.20002 0.42011   2
   2  -2 -18-0.12824 0.63087   1
   2  -2  19 12.5959 0.99142   3
  -2  -2 -19 14.0933 0.91803   2
   2  -2 -19 15.7205 0.92213   2
   2  -2 -19 18.1938 1.14229   1
  -2   2 -19 16.2901 0.93327   2
  -2  -2 -19 13.2965 0.86194   1
   2   2 -19 15.8443 0.98422   1
   2   2 -19 15.2535 0.92768   2
   2  -2 -20 2.12385 0.71452   1
  -2   2 -20 3.66255 0.49443   2
   2   2 -20 3.16004 0.49633   2
  -2  -2 -20 4.43468 0.50594   2
   2  -2 -20 3.10394 0.50294   2
  -2  -2 -20 2.92352 0.40838   1
   2   2 -20 1.87924 0.55531   1
   2  -2  20 2.88004 0.64539   3
  -2  -2 -21 2.74954 0.51648   2
   2   2 -21 2.39635 0.52371   1
   2   2 -21 3.21078 0.50473   2
   2  -2 -21 3.42942 0.51235   2
  -2   2 -21 2.85982 0.50133   2
   2  -2 -21 1.53792 0.75924   1
   2  -2  21 1.78833 0.58671   3
  -2  -2 -21 2.81883 0.38621   1
   2  -2 -22 4.37323 0.56309   2
   2  -2  22 2.45483 0.60152   3
   2   2 -22 3.71581 0.69635   1
   2   2 -22 4.46025 0.58302   2
  -2   2 -22 3.78442 0.57296   2
   2  -2 -22 4.27712 0.78865   1
  -2  -2 -22 3.94985 0.57106   2
   2  -2 -23 11.0302 0.80910   2
   2   2 -23 11.2270 0.91552   1
  -2  -2 -23 11.5606 0.83564   2
   2  -2 -23 11.0187 1.00319   1
  -2   2 -23 11.0045 0.83318   2
   2   2 -23 11.0689 0.82550   2
  -2   2 -24 16.4909 1.05318   2
  -2  -2 -24 16.2635 1.05040   2
   2  -2 -24 15.5033 1.18346   1
   2  -2 -24 15.9670 1.04150   2
   2   2 -24 16.5835 1.06387   2
  -2   2 -25-0.31837 0.60619   2
   2   2 -25-0.00920 0.62790   2
  -2  -2 -25 0.06745 0.59648   2
   2  -2 -25 0.22767 0.60105   2
   2  -2 -26-0.04086 0.61738   2
  -2   2 -26 0.58185 0.62885   2
   2   2 -26 0.85091 0.62262   2
  -2  -2 -26-0.22836 0.63113   2
  -2  -2 -27 1.69399 0.64856   2
   2  -2 -27 2.67119 0.66630   2
   2   2 -27 1.27601 0.67351   2
  -2   2 -27 2.64463 0.67779   2
  -2  -2 -28 0.07648 0.64141   2
  -2   2 -28-0.48329 0.66656   2
   2   2 -28 1.95779 0.68007   2
   2  -2 -28 0.93533 0.63136   2
  -2  -2 -29-0.60521 0.70462   2
   2   2 -29-0.51899 0.72858   2
  -2   2 -29-0.51533 0.72776   2
   2  -2 -29 0.58442 0.71124   2
   2  -2 -30 3.03600 0.76913   2
  -2   2 -30 2.23683 0.77890   2
   2   2 -30 3.05080 0.74851   2
  -2  -2 -30 1.71974 0.75079   2
  -2  -2 -31-0.75287 0.77143   2
   2   2 -31-0.03725 0.81310   2
   2  -2 -31-0.36436 0.78577   2
  -2   2 -31-1.19793 0.79165   2
   2  -2 -32 1.02493 0.84484   2
  -2  -2 -32 0.62775 0.86064   2
  -2   2 -32 0.15465 0.77747   2
   2   2 -32-0.03862 0.79210   2
  -2   2 -33-0.36199 0.80510   2
   2  -2 -33 0.25762 0.96900   2
   2   2 -33-0.88441 0.81324   2
  -2  -2 -33 1.14527 0.99857   2
  -2  -3   0 9.01934 0.65914   2
  -2  -3  -1 68.1768 3.64164   2
  -2   3   1 73.0231 3.66749   2
  -2  -3   2 109.228 5.37918   1
  -2  -3  -2 100.533 5.36054   2
  -2   3   2 102.496 5.37037   2
  -2   3   3 49.2378 2.43200   2
   2   3   3 41.8347 2.42770   2
  -2  -3  -3 47.3321 2.41704   2
  -2  -3  -4 223.682 11.4575   2
  -2   3   4 227.990 11.4599   2
   2   3   4 212.300 11.4595   2
  -2   3   5 1.44604 0.35686   2
   2   3  -5 1.22381 0.40382   1
   2   3   5 0.84683 0.36576   2
  -2  -3  -5 0.95357 0.29675   2
  -2   3   6-0.11560 0.33066   2
  -2  -3   6 0.03567 0.27560   2
   2   3   6 0.11346 0.33303   2
   2  -3   6 0.12791 0.26432   2
  -2  -3   6-0.25609 0.51179   1
  -2  -3  -6 0.42254 0.28259   2
   2   3  -6 0.52048 0.40056   1
   2   3   7 18.7125 1.10336   2
   2  -3   7 19.1555 1.08554   2
  -2  -3   7 20.8331 1.08364   2
  -2   3   7 19.4292 1.10456   2
  -2  -3   7 22.3331 1.17463   1
  -2  -3  -7 19.1475 1.07880   2
   2   3  -7 20.4964 1.13244   1
  -2  -3  -8 5.65666 0.39949   2
   2   3  -8 3.76070 0.48410   1
  -2  -3   8 3.97463 0.61013   1
  -2  -3  -8 4.21557 0.72230   3
  -2  -3   8 4.53609 0.37991   2
   2  -3   8 4.55817 0.39099   2
  -2   3   8 4.67741 0.42733   2
   2   3   8 4.94376 0.44281   2
  -2  -3  -9 1.12093 0.30540   2
   2   3   9 1.96373 0.37700   2
  -2  -3  -9 1.54546 0.68812   3
   2   3  -9 1.31299 0.44727   1
   2  -3   9 1.13445 0.30713   2
  -2  -3   9 1.60430 0.31691   2
  -2  -3   9 1.76939 0.55608   1
  -2   3   9 1.18242 0.36718   2
  -2  -3 -10 2.94511 0.36506   2
  -2  -3  10 2.95277 0.35994   2
  -2  -3 -10 3.09774 0.71640   3
   2  -3  10 3.33598 0.36417   2
  -2  -3  10 2.89691 0.57985   1
   2   3 -10 2.54321 0.46426   1
   2   3  10 3.20632 0.42229   2
  -2   3  10 2.73205 0.39688   2
  -2  -3 -11 26.9765 1.33736   2
   2   3 -11 20.5668 1.35163   1
   2   3  11 24.9455 1.35076   2
  -2  -3 -11 27.5348 1.49272   3
  -2  -3  11 23.2196 1.40636   1
  -2   3 -11 25.1874 1.32995   2
  -2  -3  11 23.6998 1.32740   2
   2  -3  11 24.1763 1.33082   2
  -2   3  11 25.0117 1.34828   2
   2  -3  12 55.7703 2.74941   2
  -2  -3  12 51.3606 2.74499   2
  -2  -3 -12 53.7566 2.75607   2
  -2   3  12 53.2271 2.76054   2
   2   3  12 54.6734 2.76422   2
   2   3 -12 43.6317 2.75495   1
  -2  -3 -12 52.3045 2.82853   3
  -2  -3  12 53.0651 2.80179   1
  -2   3 -12 52.9635 2.75194   2
  -2  -3  13 11.4951 0.87131   1
  -2   3 -13 11.6287 0.73252   2
  -2  -3 -13 12.2286 0.73473   2
   2   3  13 12.6016 0.74966   2
  -2  -3 -13 9.75117 0.82512   3
  -2   3  13 11.8714 0.75265   2
   2  -3  13 11.6676 0.72286   2
  -2  -3  13 10.9676 0.71742   2
   2  -3 -13 12.6140 0.76133   3
   2   3 -13 11.2943 0.78994   1
   2   3  14 12.0047 0.70715   2
   2   3 -14 8.93561 0.66407   2
  -2   3 -14 10.8371 0.67421   2
   2  -3 -14 8.95730 0.66790   2
  -2   3  14 11.7777 0.71326   2
   2   3 -14 10.7712 0.74002   1
   2  -3  14 11.3038 0.66724   2
  -2  -3  14 10.6169 0.66711   2
  -2  -3  14 10.4465 0.84622   1
  -2  -3 -14 9.97060 0.67480   2
  -2  -3  15 3.55103 0.63454   1
  -2  -3 -15 4.39427 0.42085   2
  -2   3  15 4.07776 0.45135   2
   2   3 -15 2.96705 0.54208   1
  -2   3 -15 4.25226 0.42475   2
  -2  -3  15 2.36552 0.41750   2
   2  -3  15 3.66207 0.42700   2
   2  -3 -15 3.62409 0.42066   2
   2   3 -15 2.13556 0.42872   2
   2   3  15 3.95359 0.45959   2
   2  -3 -16 26.7620 1.49926   2
   2  -3  16 27.8077 1.49236   2
   2   3 -16 25.7344 1.52812   1
  -2  -3 -16 30.8551 1.51028   2
   2   3 -16 25.3407 1.49020   2
   2   3  16 27.0134 1.51070   2
  -2  -3  16 27.3628 1.57401   1
   2  -3 -16 27.2502 1.59496   1
  -2  -3  16 26.5305 1.48990   2
  -2   3 -16 29.3008 1.49753   2
  -2   3  16 26.3653 1.49917   2
   2   3 -17 0.00595 0.37194   2
   2  -3 -17-0.62583 0.66598   1
   2  -3 -17 0.26179 0.38694   2
   2  -3  17 0.83994 0.39226   2
  -2   3  17 0.17061 0.43116   2
   2   3 -17-0.35046 0.52717   1
  -2   3 -17-0.34997 0.39641   2
  -2  -3 -17 0.21291 0.41263   2
   2   3  17-0.49691 0.41446   2
  -2  -3  17-0.65039 0.38963   2
  -2  -3  18 2.65834 0.41909   2
   2  -3 -18 3.52320 0.47549   2
   2   3 -18 2.29699 0.56636   1
   2   3  18 2.60716 0.46926   2
   2  -3  18 3.07193 0.43087   2
  -2   3 -18 2.73860 0.45852   2
  -2  -3 -18 2.67397 0.46219   2
   2  -3 -18 4.08433 0.76282   1
  -2   3  18 3.55683 0.48035   2
   2   3 -18 3.05316 0.44467   2
   2   3 -19 2.88028 0.58077   1
  -2   3 -19 2.71871 0.47833   2
   2  -3 -19 3.38330 0.48572   2
  -2  -3 -19 3.93127 0.50851   2
   2  -3 -19 1.80713 0.74946   1
   2   3 -19 2.69193 0.48156   2
  -2  -3  19 2.33661 0.51257   3
   2   3 -20 0.37982 0.57089   1
  -2  -3  20-0.29121 0.48273   3
   2  -3 -20 0.30918 0.73370   1
  -2   3 -20-0.60864 0.46463   2
   2  -3 -20 0.53557 0.45758   2
  -2  -3 -20 0.18903 0.44324   2
   2   3 -20-0.22118 0.46813   2
   2   3 -21 3.68218 0.51797   2
  -2   3 -21 2.89306 0.51272   2
   2  -3 -21 2.85310 0.52525   2
   2  -3  21 2.42015 0.64788   3
  -2  -3  21 1.38542 0.46379   3
  -2  -3 -21 3.39846 0.50936   2
   2  -3 -21 2.53348 0.79536   1
  -2   3 -22 0.14209 0.54350   2
  -2  -3 -22 0.56383 0.51351   2
   2  -3 -22 1.66142 0.91990   1
   2   3 -22 1.45222 0.52688   2
   2  -3 -22 0.49612 0.52680   2
   2  -3  22-0.08481 0.61627   3
  -2   3 -23-0.00881 0.57320   2
   2  -3 -23 0.58716 0.57224   2
   2  -3  23 0.79594 0.67752   3
   2  -3 -23 0.78238 0.85134   1
  -2  -3 -23 0.27530 0.56872   2
   2   3 -23 0.72857 0.55263   2
  -2  -3 -24 0.78781 0.60555   2
   2   3 -24 2.46794 0.60564   2
   2  -3 -24 0.50126 0.62264   2
   2  -3 -24 0.03964 0.83340   1
  -2   3 -24 1.51049 0.57967   2
   2   3 -25 3.40195 0.66899   2
   2  -3 -25 3.65476 0.64960   2
  -2   3 -25 4.12134 0.66937   2
  -2  -3 -25 3.47431 0.68564   2
  -2  -3 -26 7.02910 0.75167   2
   2   3 -26 6.10828 0.78055   2
  -2   3 -26 7.86791 0.78502   2
   2  -3 -26 8.04570 0.75242   2
   2   3 -27 2.34414 0.69324   2
  -2  -3 -27 2.29489 0.66845   2
   2  -3 -27 2.94089 0.66261   2
  -2   3 -27 3.45608 0.68958   2
   2  -3 -28 3.21029 0.69183   2
   2   3 -28 2.32052 0.69700   2
  -2  -3 -28 1.46636 0.67094   2
  -2   3 -28 1.85774 0.69941   2
  -2  -3 -29 0.41356 0.71115   2
   2  -3 -29 0.82557 0.69256   2
   2  -3 -30 1.51042 0.71432   2
  -2  -3 -30 1.72573 0.70089   2
  -2  -3 -31 1.64574 0.75570   2
   2  -3 -31 2.39207 0.74538   2
   2  -3 -32-1.10217 0.81899   2
  -2  -3 -32-0.01349 0.78254   2
   2  -3 -33 0.87995 0.83084   2
  -2  -3 -33 1.15890 0.81277   2
  -2  -4   0 158.302 8.23021   2
  -2  -4  -1 11.7816 0.75756   2
  -2   4   1 11.8165 0.93120   2
   2   4   1 10.5470 0.90752   2
  -2   4   2 52.4899 2.70286   2
   2   4   2 47.9851 2.70062   2
  -2  -4  -2 51.2054 2.66284   2
  -2  -4  -3 102.646 5.15456   2
  -2   4   3 102.492 5.16488   2
   2   4   3 91.6831 5.16188   2
  -2   4   4 44.1826 2.45166   2
   2   4   4 42.4749 2.45109   2
  -2  -4  -4 50.0836 2.43012   2
  -2  -4   5 55.9262 2.80819   1
  -2  -4  -5 53.9304 2.77416   2
  -2   4   5 51.8162 2.78402   2
   2   4   5 50.4426 2.79128   2
   2   4   6 61.4647 3.38110   2
  -2  -4   6 61.4036 3.39737   1
  -2  -4  -6 69.1394 3.38061   2
  -2   4   6 65.8733 3.39123   2
  -2  -4  -7 6.54093 0.43294   2
  -2   4   7 5.94257 0.50191   2
  -2  -4   7 4.13856 0.64365   1
   2   4   7 5.75290 0.50569   2
   2  -4   7 4.61228 0.42236   2
  -2  -4   7 4.30162 0.42130   2
   2  -4   8 46.1499 2.33544   2
   2   4   8 41.0317 2.35366   2
  -2  -4  -8 46.9957 2.34179   2
  -2  -4   8 44.7079 2.33618   2
  -2   4   8 41.7870 2.35400   2
  -2  -4   8 44.4267 2.38430   1
  -2   4   9 5.41571 0.50963   2
  -2  -4   9 5.11453 0.47417   2
   2   4   9 6.35507 0.50897   2
   2  -4   9 6.60954 0.48746   2
  -2  -4   9 4.80874 0.62629   1
  -2  -4  -9 6.33260 0.47270   2
   2   4  10 0.75570 0.44176   2
  -2  -4  10 0.13395 0.32576   2
  -2   4  10 0.54660 0.41083   2
  -2  -4  10-0.11905 0.59747   1
  -2  -4 -10-0.30173 0.72463   3
   2  -4  10 0.45335 0.32987   2
  -2  -4 -10 0.53478 0.31017   2
  -2  -4 -11 44.7774 2.21837   2
  -2  -4  11 38.8795 2.20659   2
  -2  -4  11 42.9413 2.27124   1
   2  -4  11 40.3923 2.20655   2
  -2   4  11 40.5470 2.22772   2
  -2  -4 -11 45.6145 2.32114   3
   2   4  11 43.1402 2.22923   2
   2  -4  12 11.1348 0.67149   1
  -2  -4 -12 12.4797 0.99709   3
  -2  -4  12 11.5763 0.87379   1
  -2  -4  12 12.3352 0.73729   2
  -2   4  12 11.3538 0.76011   2
  -2  -4 -12 12.0605 0.74696   2
   2  -4  12 13.0490 0.73161   2
   2   4  12 12.3416 0.75968   2
  -2  -4 -13 14.7813 0.86532   2
  -2  -4  13 15.2420 0.98760   1
   2   4  13 14.0879 0.87794   2
   2  -4  13 13.7788 0.78876   1
   2  -4 -13 13.7511 0.85537   2
  -2  -4  13 15.3966 0.85153   2
  -2  -4 -13 15.1263 1.07081   3
  -2   4  13 14.0370 0.87687   2
   2  -4  13 15.5364 0.84827   2
   2   4  14 0.92568 0.44566   2
  -2  -4  14 0.08674 0.57295   1
  -2   4  14 0.54373 0.42693   2
   2  -4  14 0.24634 0.37056   2
  -2  -4 -14 0.55317 0.71789   3
   2  -4 -14 0.45463 0.37542   2
  -2  -4 -14 0.47968 0.38128   2
  -2  -4  14 0.04792 0.37514   2
  -2  -4 -15 21.3316 1.33841   3
  -2  -4  15 26.3369 1.36198   1
   2  -4 -15 22.3239 1.24218   2
   2  -4  15 25.1920 1.23185   2
   2   4  15 22.0370 1.24644   2
  -2   4  15 22.7281 1.25606   2
   2  -4 -15 16.3895 1.22072   3
  -2  -4  15 21.8796 1.22506   2
  -2  -4 -15 24.0371 1.24304   2
  -2  -4  16 0.47571 0.61039   1
   2  -4  16 0.62781 0.36302   2
  -2  -4  16-0.14856 0.36642   2
   2   4  16 0.64516 0.44635   2
  -2  -4 -16 0.46213 0.41135   2
  -2   4  16 0.11049 0.41099   2
   2  -4 -16-0.55411 0.39559   2
   2  -4 -17 6.74610 0.56494   2
  -2  -4  17 5.34212 0.71628   1
  -2  -4  17 5.90732 0.54142   2
  -2  -4 -17 6.49160 0.54987   2
   2  -4  17 6.88380 0.54172   2
   2   4  17 6.61641 0.56711   2
  -2   4  17 6.44355 0.57329   2
  -2  -4 -18 0.98731 0.44387   2
   2   4  18 0.85167 0.45524   2
   2  -4  18 0.18114 0.39601   2
   2  -4 -18 0.81549 0.46184   2
  -2   4  18 0.37917 0.46612   2
  -2  -4  18 1.44272 0.63481   1
  -2  -4  18 1.24750 0.40882   2
   2  -4 -19 0.75521 0.48511   2
  -2  -4  19-0.33145 0.66937   1
  -2  -4 -19 0.27135 0.45935   2
   2  -4 -19 1.08613 0.74993   1
  -2  -4 -20 3.42913 0.53981   2
   2  -4 -20 2.26150 0.81085   1
   2  -4 -20 4.76232 0.56158   2
   2  -4 -21 3.22832 0.87031   1
   2  -4 -21 3.50573 0.55780   2
  -2  -4 -21 4.83567 0.56113   2
  -2  -4  22 0.93736 0.56968   3
  -2  -4 -22 2.67935 0.55229   2
   2  -4 -22 1.86828 0.86074   1
   2  -4 -22 2.96086 0.55694   2
   2  -4 -23 0.03319 0.90730   1
  -2  -4  23 0.59901 0.53317   3
   2  -4 -23 1.04839 0.55191   2
  -2  -4 -23 0.52376 0.57141   2
   2  -4 -24 0.44278 0.57677   2
   2  -4 -24 1.51621 0.93177   1
  -2  -4 -24 0.20107 0.55485   2
  -2  -4  24 0.78713 0.36524   3
  -2  -4 -25 5.83814 0.72642   2
   2  -4 -25 6.03401 0.71507   2
  -2  -4 -26 2.54969 0.67284   2
   2  -4 -26 1.34717 0.67417   2
  -2  -4 -27 1.24853 0.66518   2
   2  -4 -27 0.30440 0.67618   2
  -2  -4 -28 1.26982 0.66732   2
   2  -4 -28 1.09259 0.67825   2
  -2  -4 -29 2.42443 0.72578   2
   2  -4 -29 1.95826 0.72600   2
  -2  -4 -30-0.74231 0.73650   2
   2  -4 -30 0.53574 0.74822   2
  -2  -4 -31 6.68316 0.87120   2
   2  -4 -31 6.55558 0.91347   2
   2  -4 -32 0.29784 0.77979   2
  -2  -4 -32-0.18421 0.75131   2
   2  -4 -33 0.28638 0.80102   2
  -2  -4 -33-0.67887 0.80956   2
  -2  -5   0 64.4662 3.42177   2
  -2   5   1 0.98708 0.81635   2
   2   5   1 0.48284 0.79493   2
  -2  -5  -1 0.58476 0.50389   2
  -2  -5  -2 2.79600 0.44057   2
   2   5   2 3.31841 0.70555   2
  -2   5   2 4.51147 0.75048   2
   2   5   3 89.0440 4.89468   2
  -2   5   3 91.8257 4.89861   2
  -2  -5  -3 97.5949 4.87406   2
  -2  -5  -4 35.1009 1.82442   2
  -2   5   4 34.0423 1.85073   2
   2   5   4 32.5467 1.85365   2
  -2   5   5 4.98719 0.59023   2
  -2  -5  -5 5.61652 0.47782   2
   2   5   5 5.28167 0.55812   2
   2   5   6 0.53559 0.46609   2
  -2  -5  -6 0.17429 0.34856   2
  -2   5   6 0.43341 0.46030   2
  -2  -5   6 0.72201 0.53881   1
  -2   5   7 65.4627 3.60078   2
  -2  -5   7 69.9086 3.61865   1
   2   5   7 64.3593 3.60014   2
  -2  -5  -7 74.7524 3.59550   2
  -2   5   8 17.1800 1.02733   2
  -2  -5  -8 18.3969 0.99017   2
  -2  -5   8 16.0516 1.05886   1
   2   5   8 17.2993 1.01790   2
  -2  -5   9 18.1924 1.13275   1
   2  -5   9 17.8364 0.96988   2
  -2  -5   9 17.6834 0.96463   2
  -2   5   9 15.4474 1.01425   2
  -2  -5  -9 16.7301 0.97960   2
   2   5   9 17.3186 1.01016   2
  -2   5  10 4.38994 0.52932   2
  -2  -5  10 4.73044 0.43292   2
   2  -5  10 5.08707 0.44579   2
   2   5  10 4.38367 0.53344   2
  -2  -5  10 4.73397 0.64608   1
  -2  -5 -10 4.46767 0.43280   2
  -2   5  11 0.90132 0.44531   2
  -2  -5 -11 1.05193 0.39152   2
   2  -5  11 1.63305 0.42828   2
   2   5  11 1.11948 0.45752   2
  -2  -5  11 0.22020 0.40157   2
  -2  -5  11 1.17326 0.63783   1
   2   5  12 7.11402 0.59589   2
   2  -5 -12 5.64917 0.52319   2
  -2  -5 -12 6.84427 0.55375   2
  -2  -5  12 7.22595 0.53402   2
  -2  -5  12 8.56531 0.73762   1
   2  -5  12 8.20630 0.53971   2
  -2   5  12 6.83364 0.58544   2
   2  -5 -13 30.8718 1.79479   2
  -2  -5  13 33.3622 1.86261   1
   2   5  13 33.3683 1.80962   2
  -2   5  13 32.7778 1.81038   2
  -2  -5 -13 34.8771 1.80726   2
  -2  -5  13 32.0511 1.78683   2
  -2  -5 -13 35.6716 1.92359   3
   2  -5  13 35.3734 1.78817   2
  -2   5  14 3.31209 0.47480   2
   2  -5 -14 2.48752 0.44331   2
  -2  -5  14 2.63320 0.40942   2
   2   5  14 3.02201 0.48141   2
   2  -5  14 2.59703 0.34820   1
   2  -5  14 3.68418 0.42112   2
  -2  -5 -14 3.20126 0.77629   3
  -2  -5  14 3.63499 0.60839   1
  -2  -5 -14 2.55415 0.44838   2
   2   5  15 28.2690 1.45145   2
   2  -5  15 22.4605 1.36791   1
  -2  -5  15 25.7318 1.49860   1
  -2   5  15 26.7404 1.45561   2
   2  -5  15 27.3519 1.41043   2
   2  -5 -15 25.1501 1.41945   2
  -2  -5 -15 28.1866 1.55658   3
  -2  -5  15 25.7887 1.40870   2
  -2  -5 -15 28.5075 1.42716   2
   2  -5 -16 6.04967 0.54758   2
   2  -5  16 7.09065 0.52079   2
   2   5  16 5.70936 0.57888   2
   2  -5  16 5.02242 0.41118   1
  -2  -5  16 6.94447 0.50954   2
  -2  -5  16 4.90096 0.69259   1
  -2   5  16 5.48982 0.56939   2
  -2  -5 -16 6.26335 0.81809   3
  -2  -5 -16 5.79373 0.53007   2
  -2  -5  17 4.18012 0.77370   1
  -2  -5 -17 3.82199 0.69407   3
   2  -5 -17 2.82010 0.49217   2
  -2  -5  17 3.76520 0.42965   2
   2  -5  17 2.55147 0.28177   1
  -2   5  17 3.56612 0.50191   2
   2   5  17 4.09442 0.51949   2
  -2  -5 -17 4.61453 0.48923   2
   2  -5 -17 1.81617 0.36969   3
   2  -5  17 5.04033 0.46724   2
  -2  -5  18-0.45260 0.66210   1
   2  -5 -18 0.81291 0.45408   2
  -2  -5 -18 0.24354 0.44099   2
   2  -5 -19 0.05313 0.44310   2
  -2  -5  19-0.10094 0.67805   1
  -2  -5 -19 0.67128 0.46017   2
  -2  -5 -20 6.67194 0.62595   2
  -2  -5  20 6.14534 0.80756   1
   2  -5 -20 7.31941 0.62459   2
   2  -5 -21 4.59693 0.62194   2
   2  -5 -21 3.98347 0.92735   1
  -2  -5 -21 5.35159 0.62679   2
   2  -5 -22 2.04247 0.54427   2
   2  -5 -22-0.98775 0.94639   1
  -2  -5 -22 1.11163 0.57293   2
  -2  -5 -23 3.35900 0.59226   2
   2  -5 -23 3.74804 0.62463   2
   2  -5 -23 2.87382 0.99734   1
   2  -5 -24 3.47158 1.02089   1
  -2  -5  24 2.25707 0.64192   3
  -2  -5 -24 3.73655 0.63460   2
   2  -5 -24 4.15316 0.65738   2
  -2  -5 -25 7.54867 0.77081   2
   2  -5 -25 8.10683 0.74525   2
   2  -5 -26 1.62362 0.64716   2
  -2  -5 -26-1.23209 0.64968   2
  -2  -5 -27 4.97712 0.76848   2
   2  -5 -27 6.16928 0.74988   2
   2  -5 -28 2.56343 0.74452   2
  -2  -5 -28-1.13133 0.73050   2
   2  -5 -29-0.25290 0.69618   2
  -2  -5 -29 0.57509 0.70206   2
  -2  -5 -30 1.42719 0.74503   2
   2  -5 -30 0.17413 0.75932   2
   2  -5 -31 1.18642 0.80441   2
  -2  -5 -31 0.12954 0.77440   2
   2  -5 -32 0.71848 0.82660   2
  -2  -5 -32 0.38561 0.81503   2
  -2  -6   0 48.6954 2.66058   2
  -2  -6  -1 121.989 6.36888   2
  -2   6   2 98.7984 5.08120   2
   2   6   2 96.1822 5.08852   2
  -2  -6  -2 94.9510 5.03583   2
  -2   6   3 48.8592 2.64543   2
   2   6   3 48.3980 2.65766   2
  -2  -6  -3 49.0813 2.59269   2
  -2  -6  -4 1.84160 0.43447   2
   2   6   4 1.42203 0.61103   2
  -2   6   4 1.26832 0.60522   2
  -2   6   5 2.40745 0.54510   2
  -2  -6  -5 3.09559 0.42386   2
   2   6   5 2.84326 0.57889   2
  -2  -6  -6 50.1913 2.53450   2
  -2   6   6 47.9995 2.56391   2
   2   6   6 44.5102 2.55845   2
  -2   6   7 0.26420 0.50881   2
  -2  -6  -7 0.38356 0.35294   2
   2   6   7 0.75085 0.52928   2
   2   6   8 10.9523 0.76192   2
  -2  -6  -8 10.5810 0.71425   2
  -2  -6   8 12.2354 0.86253   1
  -2   6   8 10.7494 0.76715   2
  -2  -6   9 0.50263 0.53792   1
   2   6   9 1.77670 0.47925   2
  -2   6   9 1.26077 0.48935   2
  -2  -6  -9 1.44714 0.40422   2
  -2   6  10 33.3431 1.88156   2
  -2  -6  10 33.5654 1.84839   2
  -2  -6  10 31.6983 1.92405   1
   2  -6  10 35.7032 1.85220   2
   2   6  10 34.9306 1.87595   2
  -2  -6 -10 36.8226 1.86554   2
   2  -6  11 120.252 5.94697   2
  -2  -6  11 115.684 5.94553   2
  -2  -6 -11 119.349 5.95845   2
  -2  -6  11 115.336 5.96956   1
   2   6  11 112.494 5.95981   2
  -2   6  11 108.169 5.96032   2
   2  -6 -11 107.528 5.95289   2
  -2  -6 -12 21.8839 1.16218   2
  -2  -6  12 18.7098 1.23997   1
   2   6  12 19.9438 1.17632   2
  -2   6  12 19.8885 1.18170   2
   2  -6  12 21.7824 1.14337   2
  -2  -6  12 19.7283 1.14068   2
   2  -6 -12 18.3780 1.14347   2
  -2   6  13 3.17479 0.54959   2
  -2  -6  13 5.41560 0.45929   2
  -2  -6 -13 3.38131 0.46252   2
   2  -6  13 5.05664 0.45989   2
   2   6  13 4.49821 0.56096   2
   2  -6 -13 2.77570 0.46843   2
  -2  -6  13 5.10441 0.65166   1
  -2  -6  14 52.0478 2.53201   1
   2  -6 -14 43.7931 2.47314   2
   2   6  14 46.6694 2.48622   2
  -2  -6  14 45.0107 2.46198   2
   2  -6  14 47.7195 2.46435   2
  -2   6  14 44.1171 2.48879   2
  -2  -6 -14 48.5255 2.47746   2
   2  -6  15 1.03491 0.28895   1
  -2  -6 -15 1.55748 0.41835   2
   2  -6 -15 1.08931 0.44968   2
  -2  -6 -15 1.46045 0.72780   3
  -2  -6  15 1.15254 0.62945   1
  -2   6  15 2.03084 0.45600   2
   2   6  15 1.28293 0.46679   2
  -2  -6  15 1.33769 0.39950   2
   2  -6  15 1.74223 0.40886   2
   2  -6  16 11.9612 0.74510   1
  -2  -6 -16 14.9273 0.81376   2
  -2   6  16 10.9268 0.83113   2
   2  -6 -16 12.6518 0.82250   2
  -2  -6  16 12.3773 0.92672   1
  -2  -6 -16 12.7911 1.03902   3
   2   6  16 11.9500 0.82623   2
  -2  -6  16 12.3979 0.77787   2
   2  -6  16 13.0853 0.78406   2
   2  -6  17 0.26147 0.32895   1
  -2  -6 -17 0.55067 0.45157   2
  -2  -6  17-0.68505 0.39890   2
  -2  -6 -17-0.88249 0.76831   3
  -2  -6  17-1.15991 0.63471   1
   2   6  17 0.07668 0.46146   2
   2  -6  17-0.18550 0.40398   2
   2  -6 -17 0.58556 0.45604   2
  -2   6  17-0.15623 0.47283   2
  -2  -6  18-0.07550 0.65096   1
   2  -6 -18-0.08585 0.48245   2
  -2  -6 -18 0.25032 0.81685   3
  -2  -6 -18-0.57928 0.47745   2
   2  -6  18 0.07177 0.32001   1
  -2  -6 -19-0.33578 0.69070   3
  -2  -6 -19 0.68654 0.47521   2
  -2  -6  19-0.25963 0.75665   1
   2  -6  19 0.14700 0.29617   1
   2  -6 -19 1.11285 0.47663   2
   2  -6 -20 0.39150 0.52513   2
  -2  -6 -20 0.66860 0.51000   2
  -2  -6  20 0.41949 0.71327   1
  -2  -6  21 0.30517 0.76158   1
   2  -6 -21 0.95293 0.56000   2
  -2  -6 -21 0.43204 0.53580   2
  -2  -6  22 8.39135 0.93575   1
   2  -6 -22 9.36433 0.77309   2
  -2  -6 -22 8.41074 0.76842   2
   2  -6 -23 12.0411 1.32693   1
   2  -6 -23 15.8710 1.03819   2
  -2  -6 -23 15.6242 1.03436   2
   2  -6 -24 0.08020 1.03588   1
  -2  -6 -24 1.76937 0.65616   2
   2  -6 -24 0.64140 0.64871   2
   2  -6 -25 1.69675 0.64616   2
  -2  -6 -25 0.17125 0.61253   2
  -2  -6 -26-0.09872 0.64362   2
   2  -6 -26-0.28067 0.66474   2
   2  -6 -27 0.64513 0.68776   2
  -2  -6 -27-0.12425 0.68076   2
  -2  -6 -28-0.20218 0.70817   2
   2  -6 -28-0.57358 0.70492   2
   2  -6 -29 0.81486 0.75565   2
  -2  -6 -29 1.26003 0.78721   2
  -2  -6 -30 0.71213 0.77834   2
   2  -6 -30 2.05093 0.76351   2
  -2  -6 -31 2.18021 0.82556   2
   2  -6 -31 3.55067 0.81491   2
  -2  -6 -32 1.02029 0.78600   2
   2  -6 -32 2.05078 0.83310   2
  -2  -7   0 35.7688 2.00280   2
  -2  -7  -1 16.9500 1.11995   2
  -2  -7  -2 8.77206 0.70843   2
   2   7   2 8.15279 1.02810   2
  -2   7   2 10.7450 1.01592   2
  -2  -7  -3 63.6391 3.37242   2
  -2   7   3 66.1852 3.44868   2
   2   7   3 62.2992 3.45767   2
  -2   7   4 172.804 9.07118   2
  -2  -7  -4 178.087 9.04828   2
   2   7   4 169.853 9.07047   2
   2   7   5 5.33622 0.71223   2
  -2  -7  -5 4.91990 0.50378   2
  -2   7   5 4.51465 0.66469   2
  -2  -7  -6 15.4205 0.93709   2
  -2   7   6 15.3909 1.00371   2
   2   7   6 16.0322 1.00217   2
  -2   7   7 35.0414 2.05384   2
  -2  -7  -7 40.6843 2.02996   2
   2   7   7 36.0126 2.05294   2
  -2   7   8 5.50965 0.66116   2
  -2  -7  -8 7.49378 0.54508   2
   2   7   8 7.47650 0.68779   2
  -2   7   9 36.1396 2.17306   2
   2   7   9 40.1094 2.17317   2
  -2  -7  -9 43.0728 2.16433   2
  -2  -7   9 41.1813 2.20874   1
   2  -7 -10 0.25395 0.44082   2
   2   7  10 2.07251 0.52941   2
  -2  -7 -10 1.44046 0.43556   2
  -2  -7  10 1.09894 0.62235   1
  -2   7  10-0.32396 0.53171   2
  -2   7  11 0.70812 0.50921   2
  -2  -7 -11 0.31557 0.43378   2
   2   7  11-0.02566 0.50573   2
  -2  -7  11-0.00535 0.53382   1
   2  -7 -11-0.35577 0.44735   2
   2  -7  11 0.11964 0.40656   2
  -2  -7  11 0.68629 0.40094   2
  -2  -7 -12 19.8273 1.14420   2
   2  -7  12 21.7810 1.13124   2
   2  -7 -12 18.1297 1.13806   2
  -2  -7  12 23.0406 1.34667   1
  -2  -7  12 19.0750 1.12325   2
  -2   7  12 17.8520 1.16999   2
   2   7  12 21.5717 1.18723   2
  -2  -7  13 15.0620 0.95949   1
  -2  -7 -13 14.1013 0.86327   2
   2  -7  13 14.2523 0.82970   2
  -2   7  13 12.3065 0.88644   2
  -2  -7  13 14.6315 0.83293   2
   2   7  13 12.9484 0.89313   2
   2  -7 -13 12.0855 0.84349   2
   2  -7 -14 13.2913 0.88769   2
   2   7  14 13.6205 0.89963   2
  -2   7  14 11.4892 0.89989   2
  -2  -7  14 12.3698 1.00276   1
  -2  -7 -14 15.7706 0.89012   2
   2  -7  14 16.5227 0.88241   2
  -2  -7  14 14.2645 0.87784   2
  -2  -7  15 7.84701 0.75904   1
   2  -7 -15 6.58015 0.59854   2
  -2   7  15 6.07534 0.65147   2
  -2  -7  15 7.21156 0.56655   2
  -2  -7 -15 7.54117 0.58187   2
   2  -7  15 7.74620 0.56731   2
   2   7  15 7.85998 0.66084   2
   2   7  16 1.10751 0.54062   2
  -2  -7  16 0.76162 0.40297   2
  -2  -7 -16 1.10905 0.46234   2
  -2   7  16 0.74204 0.53224   2
   2  -7  16 0.09504 0.40866   2
   2  -7  16 0.58143 0.39450   1
  -2  -7  16 0.46311 0.65029   1
   2  -7 -16-0.50488 0.48615   2
   2  -7 -17 2.06083 0.49061   2
   2  -7  17 1.48774 0.39168   1
  -2  -7 -17 2.64164 0.50623   2
  -2  -7  17 2.34526 0.70050   1
  -2  -7 -17 1.00371 0.80139   3
   2  -7 -18 18.1510 0.99390   2
  -2  -7 -18 17.4387 0.99230   2
   2  -7  18 13.0272 0.91066   1
  -2  -7 -18 17.4643 1.19507   3
  -2  -7  18 14.8485 1.09833   1
  -2  -7 -19-0.06852 0.50336   2
   2  -7  19 0.00608 0.38207   1
   2  -7 -19 0.10112 0.50301   2
  -2  -7  19-0.22336 0.75250   1
  -2  -7 -19 0.61873 0.81824   3
  -2  -7  20 25.3704 1.54884   1
   2  -7  20 21.9998 1.36613   1
  -2  -7 -20 27.9211 1.44146   2
   2  -7 -20 28.7158 1.45880   2
  -2  -7 -20 23.5126 1.56963   3
  -2  -7  21 8.47219 0.94811   1
   2  -7 -21 9.20210 0.75609   2
  -2  -7 -21 9.26077 0.77920   2
  -2  -7 -22 2.98917 0.61158   2
   2  -7 -22 1.21518 0.60674   2
  -2  -7  22 1.08735 0.80743   1
   2  -7 -23 2.29966 0.63813   2
  -2  -7  23 0.34124 0.84950   1
  -2  -7 -23 1.69896 0.61583   2
  -2  -7 -24-1.32968 0.64875   2
   2  -7 -24 0.75005 0.63721   2
  -2  -7 -25 1.95806 0.69402   2
   2  -7 -25 2.15514 0.68202   2
   2  -7 -26 3.50962 0.74967   2
  -2  -7 -26 3.80545 0.72469   2
  -2  -7 -27 3.30648 0.72484   2
   2  -7 -27 4.55221 0.75236   2
   2  -7 -28 2.22870 0.71297   2
  -2  -7 -28-0.27700 0.69728   2
  -2  -7 -29 0.23673 0.73193   2
   2  -7 -29-0.66237 0.75475   2
  -2  -7 -30-0.59385 0.74401   2
   2  -7 -30 0.36400 0.74488   2
   2  -7 -31 2.16238 0.85004   2
  -2  -7 -31-0.30777 0.83195   2
   2  -7 -32 1.39341 0.82392   2
  -2  -7 -32 0.60034 0.83260   2
  -2  -8   0-0.58936 0.72526   2
  -2  -8   1 3.16396 0.78966   2
  -2  -8  -1 1.62923 0.60511   2
  -2   8   2 23.2820 1.64824   2
   2   8   2 24.6358 1.63899   2
  -2  -8  -2 24.5854 1.40986   2
  -2   8   3 6.04021 0.97671   2
   2   8   3 7.20416 1.00467   2
  -2  -8  -3 6.52641 0.61203   2
  -2  -8  -4-0.22405 0.48278   2
  -2   8   4-0.29337 0.82381   2
   2   8   4 0.12673 0.76789   2
   2   8   5 26.5275 1.53927   2
  -2   8   5 24.0441 1.54440   2
  -2  -8  -5 25.5230 1.43123   2
  -2  -8  -6 94.3090 4.89476   2
  -2   8   6 89.2015 4.93142   2
   2   8   6 96.9194 4.93164   2
  -2  -8  -7 51.6053 2.57028   2
  -2   8   7 48.4194 2.60916   2
   2  -8  -7 42.1334 2.56785   2
   2   8   7 52.3921 2.61238   2
   2   8   8 17.4456 1.09626   2
  -2   8   8 16.1965 1.08987   2
  -2  -8  -8 16.5291 1.01545   2
  -2   8   9-0.45727 0.59434   2
   2   8   9 1.42597 0.57419   2
  -2  -8  -9 1.32904 0.46358   2
   2  -8  -9 0.17990 0.43113   2
   2   8  10 62.4356 3.32021   2
   2  -8 -10 58.8701 3.29137   2
  -2  -8 -10 66.0422 3.29962   2
  -2   8  10 61.3197 3.31898   2
  -2  -8  10 64.0127 3.33331   1
   2  -8 -11 1.06374 0.45986   2
  -2   8  11 1.38691 0.54976   2
   2   8  11 2.40683 0.57206   2
  -2  -8  11 2.12655 0.68796   1
  -2  -8 -11 1.75339 0.47739   2
  -2  -8  12 14.6087 0.89038   2
   2  -8 -12 13.0775 0.91306   2
   2  -8  12 16.2006 0.89557   2
  -2  -8  12 12.3452 0.94972   1
  -2   8  12 13.7595 0.97547   2
   2   8  12 15.5406 0.97009   2
  -2  -8 -12 17.2854 0.95176   2
   2   8  13 28.0300 1.53990   2
  -2  -8  13 25.1107 1.48632   2
  -2   8  13 25.4403 1.53440   2
   2  -8 -13 25.4888 1.50226   2
   2  -8  13 28.4083 1.49378   2
  -2  -8 -13 31.9116 1.51665   2
  -2  -8  13 25.3784 1.60515   1
  -2   8  14 14.5712 0.99641   2
  -2  -8  14 15.4076 0.93772   2
   2  -8 -14 14.1962 0.95719   2
  -2  -8 -14 17.5293 0.95655   2
   2   8  14 14.7036 0.99859   2
  -2  -8  14 16.0313 1.06738   1
   2  -8  14 16.2747 0.93837   2
   2   8  15 25.6334 1.52884   2
  -2  -8  15 24.2532 1.56515   1
   2  -8  15 31.4137 1.51914   2
   2  -8 -15 25.9732 1.51186   2
  -2  -8 -15 27.0443 1.50530   2
  -2   8  15 24.1508 1.52205   2
  -2  -8  15 28.0530 1.50898   2
   2  -8 -16 0.65530 0.47592   2
  -2  -8 -16 0.58764 0.47953   2
   2  -8  16 1.07215 0.45600   2
  -2  -8  16 1.17729 0.70528   1
  -2  -8 -17 6.21939 0.61532   2
   2  -8  17 5.01408 0.54917   1
  -2  -8  17 6.28555 0.80741   1
   2  -8 -17 6.43741 0.60814   2
   2  -8 -18 13.8241 0.87875   2
  -2  -8 -18 14.0751 0.88274   2
  -2  -8 -18 12.8779 1.12609   3
   2  -8  18 11.7813 0.86660   1
  -2  -8  18 12.8279 1.06031   1
  -2  -8 -19 1.23147 0.86924   3
  -2  -8 -19 1.49384 0.52865   2
   2  -8  19 1.45824 0.47928   1
   2  -8 -19 1.40816 0.54546   2
  -2  -8  19 1.53572 0.77218   1
   2  -8  20 0.24355 0.47394   1
  -2  -8  20 0.48426 0.79932   1
   2  -8 -20 0.92520 0.56339   2
  -2  -8 -20-0.50267 0.56940   2
  -2  -8 -20 0.70656 0.86012   3
   2  -8  21 6.74342 0.63034   1
  -2  -8 -21 9.42471 0.77196   2
  -2  -8  21 7.87504 0.92831   1
   2  -8 -21 9.39249 0.74444   2
   2  -8 -22 11.0009 0.86685   2
  -2  -8 -22 9.47985 0.82886   2
  -2  -8  22 10.4062 1.10502   1
   2  -8 -23 28.9472 1.62984   2
  -2  -8 -23 27.2059 1.63434   2
  -2  -8  23 27.4500 1.72395   1
   2  -8 -24 3.03252 0.64324   2
  -2  -8 -24 2.66341 0.65703   2
   2  -8 -25 3.59782 0.69024   2
  -2  -8 -25 3.42859 0.68370   2
   2  -8 -26 2.87220 0.69710   2
  -2  -8 -26-0.20326 0.70029   2
   2  -8 -27 0.97186 0.72307   2
  -2  -8 -27-0.16040 0.72724   2
  -2  -8 -28 0.62199 0.72176   2
   2  -8 -28 0.66243 0.72732   2
   2  -8 -29 3.24781 0.82127   2
  -2  -8 -29 1.95461 0.78673   2
  -2  -8 -30 2.01575 0.81605   2
   2  -8 -30 4.23126 0.79876   2
  -2  -8 -31 1.20841 0.80734   2
   2  -8 -31 1.12168 0.82176   2
  -2  -9   0 15.2037 1.11816   2
  -2  -9  -1 1.51064 0.64116   2
  -2  -9   1 1.21113 0.81820   2
  -2  -9  -2 28.0375 1.60462   2
   2   9   3 28.7442 1.81737   2
  -2  -9  -3 27.9657 1.58646   2
  -2   9   3 27.1176 1.80067   2
  -2   9   4 6.66692 1.02499   2
  -2  -9  -4 8.60750 0.69458   2
   2   9   4 9.36325 1.03856   2
   2  -9  -5 29.2877 1.85326   2
   2   9   5 39.4843 2.00351   2
  -2  -9  -5 36.3550 1.87776   2
  -2   9   5 36.4955 1.99223   2
   2  -9  -6-1.03752 0.52653   2
  -2   9   6 1.72764 0.77235   2
   2   9   6 2.12368 0.80991   2
  -2  -9  -6 0.70470 0.49217   2
  -2  -9  -7 6.28115 0.58259   2
   2   9   7 7.21433 0.81418   2
   2  -9  -7 5.00638 0.55444   2
  -2   9   7 5.68427 0.76820   2
  -2  -9  -8 134.865 6.77425   2
   2  -9  -8 125.351 6.76842   2
   2   9   8 128.780 6.78914   2
  -2   9   8 130.665 6.79518   2
   2   9   9 7.88091 0.75783   2
  -2   9   9 7.15390 0.73842   2
  -2  -9  -9 6.99570 0.64040   2
   2  -9  -9 7.84273 0.62838   2
  -2   9  10 33.7479 1.98654   2
   2  -9 -10 34.3540 1.94730   2
   2   9  10 36.1347 1.99035   2
  -2  -9 -10 38.7220 1.96181   2
  -2  -9  11 14.4787 1.07239   1
  -2  -9 -11 15.7515 0.93726   2
   2  -9 -11 13.8195 0.93179   2
   2   9  11 16.2131 1.00680   2
  -2   9  11 15.4122 1.03184   2
  -2   9  12 0.40465 0.57546   2
   2  -9 -12 0.32856 0.44645   2
   2   9  12-0.28118 0.56891   2
  -2  -9  12-0.19725 0.70061   1
  -2  -9 -12 0.59136 0.47796   2
  -2  -9  13-0.28136 0.43427   2
   2   9  13 0.48068 0.57698   2
  -2   9  13 0.80813 0.57179   2
   2  -9 -13-0.59451 0.50746   2
   2  -9  13 0.48495 0.43182   2
  -2  -9 -13-0.27241 0.52001   2
  -2  -9  13 0.28734 0.61128   1
   2  -9  14 0.72699 0.44302   2
  -2   9  14-0.10401 0.55155   2
  -2  -9 -14 0.81937 0.48127   2
   2  -9 -14 0.43080 0.49166   2
  -2  -9  14 0.90475 0.67662   1
   2   9  14 0.22953 0.59412   2
  -2  -9  14 0.85497 0.42455   2
   2   9  15 1.63459 0.57044   2
   2  -9  15 2.27294 0.45598   2
  -2  -9  15 1.66280 0.72876   1
  -2  -9  15 1.70798 0.47049   2
   2  -9 -15 1.96252 0.51027   2
  -2   9  15 2.09645 0.57735   2
  -2  -9 -15 1.96090 0.50050   2
   2  -9 -16 8.86632 0.69315   2
  -2  -9 -16 8.35443 0.70634   2
  -2  -9  16 6.13011 0.85272   1
   2  -9 -17 0.94990 0.51896   2
  -2  -9  17-0.00856 0.75598   1
  -2  -9 -17 1.34206 0.51677   2
   2  -9  18 0.09671 0.51134   1
  -2  -9  18 0.98795 0.79304   1
  -2  -9 -18-0.17952 0.52490   2
   2  -9 -18 1.29895 0.53168   2
   2  -9  19 5.15038 0.70782   1
   2  -9 -19 7.75476 0.66983   2
  -2  -9 -19 6.74056 0.66803   2
  -2  -9 -19 7.54380 1.05435   3
  -2  -9  19 5.30049 0.90763   1
  -2  -9 -20 5.59401 0.69306   2
   2  -9  20 4.95347 0.62688   1
   2  -9 -20 7.43609 0.71140   2
  -2  -9  20 6.73824 0.92229   1
   2  -9  21 38.2387 2.42069   1
  -2  -9  21 45.3248 2.55082   1
  -2  -9 -21 51.2797 2.48983   2
   2  -9 -21 52.3082 2.49036   2
  -2  -9  22 10.3262 1.11070   1
   2  -9 -22 13.1607 0.94930   2
  -2  -9 -22 13.3987 0.94559   2
  -2  -9 -23 0.49647 0.63439   2
   2  -9 -23 1.60970 0.66668   2
  -2  -9 -24 2.19061 0.63704   2
   2  -9 -24 2.38821 0.68607   2
   2  -9 -25 2.05561 0.66895   2
  -2  -9 -25 1.15345 0.67931   2
  -2  -9 -26 4.69237 0.72026   2
   2  -9 -26 3.96461 0.75096   2
  -2  -9 -27 0.22949 0.72650   2
   2  -9 -27 0.74113 0.72017   2
  -2  -9 -28 1.24419 0.74330   2
   2  -9 -28 0.84734 0.76528   2
   2  -9 -29 0.37375 0.77787   2
  -2  -9 -29-0.05421 0.78550   2
  -2  -9 -30 1.38804 0.81893   2
   2  -9 -30-0.16414 0.82872   2
  -2  -9 -31 1.15087 0.81775   2
   2  -9 -31 1.96323 0.83118   2
   2 -10   0 8.39727 0.98401   2
  -2 -10   0 12.5806 0.97951   2
   2 -10  -1 9.36808 0.90219   2
   2 -10   1 9.58615 1.03701   2
  -2 -10  -1 12.9575 0.91475   2
  -2 -10   1 10.8522 1.02338   2
  -2 -10  -2 3.30162 0.64169   2
   2 -10  -2 1.67516 0.61814   2
  -2  10   3 7.48960 1.20312   2
   2  10   3 9.40921 1.14603   2
   2 -10  -3 6.98667 0.71278   2
  -2 -10  -3 7.51463 0.73875   2
  -2  10   4 1.31796 1.01714   2
   2 -10  -4 0.99411 0.53087   2
  -2 -10  -4 0.61870 0.50667   2
   2  10   4 1.49082 0.98940   2
   2  10   5 39.9936 2.19602   2
  -2 -10  -5 37.4869 2.04493   2
   2 -10  -5 35.1468 2.03868   2
  -2  10   5 38.5821 2.18834   2
   2 -10  -6 88.8101 4.91827   2
  -2 -10  -6 94.8071 4.92493   2
   2  10   6 97.9109 4.98315   2
  -2  10   6 96.6708 4.98212   2
  -2 -10  -7 17.4186 1.07893   2
   2  10   7 19.1733 1.24793   2
   2 -10  -7 16.3699 1.06584   2
  -2  10   7 18.7174 1.26296   2
   2  10   8 19.2460 1.19615   2
   2 -10  -8 15.5971 1.04672   2
  -2 -10  -8 16.9639 1.05104   2
  -2  10   8 16.9243 1.17466   2
   2  10   9 12.4362 0.94782   2
   2 -10  -9 11.2481 0.82548   2
  -2  10   9 11.6375 0.94774   2
  -2 -10  -9 12.2163 0.85536   2
  -2  10  10 13.5449 0.92908   2
  -2 -10 -10 12.0933 0.83107   2
   2  10  10 13.1649 0.94178   2
   2 -10 -10 11.3604 0.82706   2
  -2 -10 -11 15.4075 0.93266   2
  -2  10  11 13.6550 0.99814   2
   2 -10 -11 12.9890 0.90508   2
   2  10  11 13.1494 0.99848   2
  -2  10  12 1.74148 0.64596   2
  -2 -10  12 2.57156 0.74043   1
   2 -10 -12 2.82718 0.51502   2
  -2 -10 -12 2.15324 0.51697   2
   2  10  12 2.24660 0.65089   2
  -2 -10  13 9.02276 0.94221   1
  -2  10  13 10.2910 0.86758   2
   2  10  13 9.84695 0.85803   2
  -2 -10 -13 11.3060 0.77344   2
   2 -10 -13 11.1000 0.78269   2
  -2 -10 -14 0.15488 0.51849   2
   2 -10  14 0.05052 0.45526   2
  -2  10  14-0.92369 0.60374   2
   2 -10 -14 0.52055 0.53951   2
  -2 -10  14-0.04447 0.45257   2
  -2 -10  14-0.22356 0.64444   1
  -2 -10  15 7.98269 0.87233   1
  -2 -10 -15 8.39598 0.71084   2
   2 -10 -15 8.40785 0.70404   2
  -2 -10  16 8.63113 1.01445   1
   2 -10 -16 11.2951 0.79941   2
  -2 -10 -16 10.2522 0.77993   2
  -2 -10  17 1.33315 0.83111   1
  -2 -10 -17 6.29175 0.63733   2
   2 -10 -17 5.29937 0.63064   2
  -2 -10 -18 24.6499 1.48704   2
   2 -10 -18 26.8334 1.49362   2
  -2 -10  18 24.7994 1.59947   1
  -2 -10  19 24.7537 1.63071   1
  -2 -10 -19 30.8111 1.53449   2
   2 -10 -19 29.1590 1.51252   2
   2 -10  19 20.0841 1.48657   1
  -2 -10 -20 0.09104 0.60497   2
   2 -10 -20 0.23060 0.62361   2
   2 -10  20 0.41592 0.64808   1
  -2 -10  20 0.50926 0.89868   1
  -2 -10 -21 4.31363 0.70651   2
  -2 -10  21 5.27605 0.96967   1
   2 -10 -21 5.00560 0.71393   2
  -2 -10  22 4.32090 0.95370   1
  -2 -10 -22 5.92198 0.74212   2
   2 -10 -22 6.01325 0.71156   2
  -2 -10 -23 1.00475 0.65734   2
   2 -10 -23 1.06803 0.69867   2
  -2 -10 -24-0.66719 0.66087   2
   2 -10 -24 0.40370 0.70693   2
   2 -10 -25 1.69027 0.67942   2
  -2 -10 -25 1.13206 0.70476   2
   2 -10 -26-0.04888 0.70763   2
  -2 -10 -26-0.79342 0.72706   2
  -2 -10 -27 4.15927 0.78715   2
   2 -10 -27 4.98707 0.81393   2
  -2 -10 -28-0.13403 0.78953   2
   2 -10 -28 1.63724 0.79805   2
  -2 -10 -29 0.31067 0.85090   2
   2 -10 -29 1.15476 0.83829   2
  -2 -10 -30-0.67472 0.84620   2
   2 -10 -30-0.01414 0.81171   2
   2 -11   0 48.7872 2.84207   2
  -2 -11   0 54.4433 2.85256   2
  -2 -11   1 40.1792 2.24834   2
  -2 -11  -1 42.6300 2.19012   2
   2 -11   1 34.1641 2.21454   2
   2 -11  -1 37.3318 2.17601   2
  -2 -11  -2 9.44779 0.81657   2
   2 -11  -2 8.56525 0.80758   2
  -2 -11   2 7.14237 1.04363   2
   2 -11   2 6.55942 1.04407   2
   2 -11  -3 28.4508 1.67726   2
  -2 -11  -3 29.8032 1.67240   2
  -2 -11  -4 16.5755 1.07676   2
   2 -11  -4 16.0253 1.05899   2
  -2  11   4 16.8338 1.40738   2
   2  11   4 17.3547 1.44578   2
  -2  11   5 20.6496 1.47290   2
   2  11   5 22.8955 1.49658   2
  -2 -11  -5 18.9620 1.21857   2
   2 -11  -5 19.7294 1.22926   2
  -2 -11  -6 27.1186 1.52645   2
   2 -11  -6 23.8156 1.50388   2
  -2  11   6 27.3692 1.72059   2
   2  11   6 30.9904 1.74808   2
   2  11   7 0.33541 0.86046   2
   2 -11  -7-0.25713 0.53368   2
  -2  11   7-1.42388 0.87557   2
  -2 -11  -7 0.97216 0.53679   2
  -2  11   8 4.82710 0.85255   2
   2  11   8 4.86441 0.81894   2
   2 -11  -8 4.72149 0.60309   2
  -2 -11  -8 4.59989 0.57960   2
   2  11   9 1.62765 0.75965   2
  -2 -11  -9 0.31629 0.49355   2
   2 -11  -9-0.01690 0.52203   2
  -2  11   9-0.01112 0.76500   2
   2  11  10 1.09339 0.74242   2
  -2  11  10 0.79965 0.70563   2
   2 -11 -10-0.24117 0.53800   2
  -2 -11 -10-0.62811 0.54176   2
   2  11  11 8.29892 0.83444   2
   2 -11 -11 7.67240 0.69228   2
  -2  11  11 9.14477 0.83204   2
  -2 -11 -11 9.17656 0.72402   2
   2  11  12 1.38051 0.69220   2
   2 -11 -12-0.58198 0.56266   2
  -2  11  12-0.50310 0.70326   2
  -2 -11 -12 0.56193 0.55964   2
  -2 -11  13 1.09892 0.78609   1
   2 -11 -13-0.55390 0.55200   2
  -2 -11 -13 0.77068 0.52452   2
  -2 -11 -14 1.58734 0.55184   2
   2 -11 -14 2.25225 0.54919   2
  -2 -11  14 0.23252 0.81804   1
   2 -11 -15 5.04767 0.63216   2
  -2 -11 -15 5.16682 0.62434   2
  -2 -11  15 3.03453 0.75774   1
   2 -11 -16 1.57366 0.58816   2
  -2 -11  16 1.77225 0.81881   1
  -2 -11 -16 1.88959 0.56530   2
  -2 -11 -17 7.37272 0.72012   2
   2 -11 -17 8.94333 0.73433   2
  -2 -11  17 7.20728 1.05192   1
  -2 -11 -18 15.5224 1.08268   2
  -2 -11  18 12.7525 1.24781   1
   2 -11 -18 17.6885 1.08540   2
   2 -11 -19 5.24117 0.68253   2
   2 -11  19 2.56471 0.71463   1
  -2 -11  19 3.15421 0.95393   1
  -2 -11 -19 5.26196 0.70077   2
   2 -11  20 6.26372 0.69882   1
   2 -11 -20 9.75342 0.80300   2
  -2 -11 -20 6.71844 0.76629   2
  -2 -11  20 9.03642 1.06515   1
  -2 -11  21 21.2248 1.60606   1
   2 -11 -21 24.8584 1.43753   2
  -2 -11 -21 23.2094 1.45159   2
  -2 -11 -22 2.79228 0.68826   2
   2 -11 -22 3.47717 0.69853   2
  -2 -11 -23 2.97925 0.71556   2
   2 -11 -23 3.45159 0.73484   2
  -2 -11 -24 1.05385 0.72449   2
   2 -11 -24 1.70665 0.68774   2
   2 -11 -25-1.01719 0.74118   2
  -2 -11 -25 0.46553 0.71812   2
  -2 -11 -26 0.63661 0.72296   2
   2 -11 -26-0.30109 0.73205   2
   2 -11 -27 2.21501 0.76154   2
  -2 -11 -27-0.23799 0.75119   2
  -2 -11 -28 0.44531 0.74685   2
   2 -11 -28 0.66494 0.76229   2
  -2 -11 -29 0.17079 0.80531   2
   2 -11 -29 0.54702 0.80563   2
  -2 -11 -30 0.04489 0.82808   2
   2 -11 -30 1.19467 0.85184   2
   2 -12   0-0.01267 0.79795   2
  -2 -12   0 0.11416 0.79255   2
  -2 -12   1 7.74082 0.97551   2
   2 -12  -1 5.74762 0.82024   2
   2 -12   1 6.43508 0.95591   2
  -2 -12  -1 8.05039 0.87274   2
  -2 -12   2 3.11438 0.95325   2
  -2 -12  -2 3.35739 0.69556   2
   2 -12   2-0.47072 0.95756   2
   2 -12  -2 2.52680 0.68597   2
   2 -12  -3 13.6353 1.03997   2
  -2 -12  -3 17.0992 1.07891   2
  -2  12   4 20.8694 1.64278   2
   2 -12  -4 17.9539 1.24167   2
   2  12   4 24.6637 1.62443   2
  -2 -12  -4 21.4100 1.25272   2
  -2  12   5 0.38186 1.05800   2
   2  12   5 2.19975 1.09932   2
  -2 -12  -5 1.02246 0.59600   2
   2 -12  -5 1.28721 0.55907   2
   2  12   6 6.63336 1.11293   2
   2 -12  -6 6.20750 0.69000   2
  -2  12   6 7.38347 1.05385   2
  -2 -12  -6 7.29323 0.70026   2
   2 -12  -7 0.68296 0.53907   2
  -2 -12  -7 0.02758 0.57385   2
  -2  12   7 1.51413 0.97874   2
   2  12   7 1.61863 0.94044   2
  -2  12   8 0.79733 0.91088   2
   2 -12  -8 1.23733 0.57990   2
   2  12   8 0.84254 0.90213   2
  -2 -12  -8 1.18593 0.54569   2
   2 -12  -9 7.44822 0.73237   2
  -2  12   9 8.89709 0.97351   2
  -2 -12  -9 9.55455 0.73265   2
   2  12   9 8.63462 1.00028   2
   2  12  10 3.47382 0.83050   2
  -2 -12 -10 3.46607 0.61205   2
   2 -12 -10 4.54323 0.60076   2
  -2  12  10 4.01550 0.81551   2
   2 -12 -11 5.12065 0.61502   2
  -2  12  11 4.51248 0.81977   2
  -2 -12 -11 4.69175 0.60990   2
   2  12  11 5.94913 0.87056   2
  -2 -12 -12 0.28467 0.54459   2
   2 -12 -12 0.88992 0.56550   2
   2 -12 -13 4.21052 0.61372   2
  -2 -12 -13 4.17739 0.62051   2
   2 -12 -14 0.27839 0.55650   2
  -2 -12  14 0.05591 0.84352   1
  -2 -12 -14-0.50592 0.56321   2
   2 -12 -15 6.25748 0.67511   2
  -2 -12 -15 4.82261 0.66023   2
  -2 -12  15 5.26532 0.98796   1
   2 -12 -16 11.0470 0.79760   2
  -2 -12 -16 9.82057 0.78622   2
  -2 -12  16 5.38354 0.89287   1
   2 -12 -17 4.89272 0.65281   2
  -2 -12 -17 3.98843 0.67271   2
  -2 -12  17 1.96695 0.96377   1
   2 -12 -18 16.2865 1.06009   2
  -2 -12 -18 15.4933 1.05913   2
  -2 -12  18 12.7157 1.29306   1
   2 -12 -19 10.7449 0.89128   2
  -2 -12 -19 11.5845 0.88177   2
  -2 -12  19 7.05567 1.08901   1
   2 -12 -20 1.72276 0.65399   2
  -2 -12  20 1.54590 0.98320   1
  -2 -12 -20 1.50043 0.65487   2
   2 -12 -21 0.68436 0.67360   2
  -2 -12 -21 0.11374 0.65514   2
  -2 -12  21 1.84620 1.00638   1
   2 -12 -22 2.57195 0.70558   2
  -2 -12 -22 0.98593 0.70502   2
  -2 -12 -23 4.37922 0.78715   2
   2 -12 -23 5.79920 0.78102   2
   2 -12 -24 3.08268 0.77496   2
  -2 -12 -24 2.82811 0.73724   2
  -2 -12 -25-0.18115 0.74619   2
   2 -12 -25 0.75290 0.73188   2
   2 -12 -26 1.20438 0.78620   2
  -2 -12 -26 1.38204 0.78198   2
  -2 -12 -27 1.02977 0.78075   2
   2 -12 -27 1.68177 0.82459   2
   2 -12 -28 2.29929 0.84005   2
  -2 -12 -28 0.44933 0.77664   2
   2 -12 -29 0.66349 0.84481   2
  -2 -12 -29-0.51517 0.79720   2
  -2 -13   0 2.40071 0.79223   2
   2 -13   0-0.69295 0.77802   2
   2 -13  -1 9.05059 0.93289   2
   2 -13   1 8.56597 1.01341   2
  -2 -13   1 10.9871 1.03021   2
  -2 -13  -1 12.3073 0.93589   2
   2 -13   2 0.92927 0.94494   2
   2 -13  -2 0.89649 0.66272   2
  -2 -13   2 2.04067 0.96492   2
  -2 -13  -2 1.36035 0.68386   2
   2 -13   3 2.46489 0.98782   2
  -2 -13   3 1.06312 0.95079   2
  -2 -13  -3 1.17707 0.65253   2
   2 -13  -3 0.89327 0.66644   2
  -2 -13  -4-0.22250 0.60600   2
   2 -13  -4-0.65948 0.63483   2
  -2 -13  -5-0.29503 0.61228   2
   2 -13  -5-0.41435 0.60897   2
  -2  13   5-0.39702 1.12936   2
   2  13   5 0.60602 1.18535   2
  -2  13   6 17.4675 1.44551   2
   2  13   6 17.9857 1.47065   2
  -2 -13  -6 16.7710 1.07929   2
   2 -13  -6 15.7483 1.10897   2
   2  13   7 0.69238 1.03474   2
   2 -13  -7 0.96270 0.58537   2
  -2 -13  -7 1.42695 0.59994   2
  -2  13   7 1.81360 1.04847   2
   2  13   8 4.71631 1.07934   2
  -2 -13  -8 4.22184 0.64112   2
  -2  13   8 5.12168 1.07152   2
   2 -13  -8 5.28008 0.65611   2
  -2  13   9 5.56913 0.94585   2
   2 -13  -9 5.58651 0.66386   2
   2  13   9 5.27509 0.98640   2
  -2 -13  -9 5.19110 0.62907   2
  -2 -13 -10 1.56651 0.60878   2
   2 -13 -10 3.60695 0.63890   2
  -2 -13 -11 2.61025 0.60455   2
   2 -13 -11 1.88492 0.61530   2
   2 -13 -12 1.21716 0.58282   2
  -2 -13 -12 1.07526 0.55152   2
   2 -13 -13 6.34505 0.72330   2
  -2 -13 -13 6.18934 0.70625   2
   2 -13 -14 0.65289 0.61722   2
  -2 -13 -14 0.59892 0.57563   2
  -2 -13  15-0.70374 0.96581   1
   2 -13 -15 0.93153 0.62711   2
  -2 -13 -15-0.76311 0.59523   2
  -2 -13 -16 4.03763 0.72552   2
   2 -13 -16 5.58318 0.73584   2
  -2 -13  16 4.51414 1.01804   1
  -2 -13 -17 2.27881 0.66941   2
  -2 -13  17 1.93399 0.72171   1
   2 -13 -17 3.05647 0.65832   2
   2 -13 -18 2.18468 0.68095   2
  -2 -13  18 2.03254 1.04944   1
  -2 -13 -18 0.63745 0.65493   2
   2 -13 -19 0.02264 0.66644   2
  -2 -13 -19 0.19510 0.68948   2
  -2 -13  19 0.01102 1.03120   1
   2 -13 -20 1.47080 0.74601   2
  -2 -13  20 2.16426 1.02765   1
  -2 -13 -20 0.94068 0.71833   2
  -2 -13 -21-0.09436 0.65828   2
   2 -13 -21 1.34054 0.71625   2
  -2 -13 -22 1.04865 0.72311   2
   2 -13 -22 2.28605 0.73306   2
   2 -13 -23 6.28152 0.81844   2
  -2 -13 -23 6.38146 0.81055   2
   2 -13 -24 0.77942 0.76194   2
  -2 -13 -24 1.05090 0.77264   2
  -2 -13 -25-0.05312 0.72457   2
   2 -13 -25 1.67741 0.76417   2
   2 -13 -26 1.22304 0.80720   2
  -2 -13 -26-0.28922 0.79209   2
   2 -13 -27 0.45037 0.84655   2
  -2 -13 -27 0.19881 0.79245   2
  -2 -13 -28-0.24437 0.79263   2
   2 -13 -28 0.95035 0.81413   2
   2 -14   0 10.7301 1.11645   2
  -2 -14   0 13.8732 1.09064   2
   2 -14  -1 1.18367 0.75066   2
  -2 -14  -1 2.47537 0.75013   2
  -2 -14   1 2.53427 0.88249   2
   2 -14   1 3.87918 0.88593   2
   2 -14  -2 2.05375 0.73720   2
   2 -14   2 2.20282 0.93906   2
  -2 -14  -2 2.86860 0.73827   2
  -2 -14   2 1.21995 0.92864   2
   2 -14  -3 1.56757 0.67210   2
  -2 -14   3 2.55927 0.97904   2
   2 -14   3 1.80842 0.99415   2
  -2 -14  -3 2.32614 0.65789   2
   2 -14  -4 6.52399 0.77496   2
  -2 -14  -4 7.27828 0.78124   2
   2 -14  -5 6.62916 0.74375   2
  -2 -14  -5 5.51343 0.72781   2
   2 -14  -6 0.91124 0.61558   2
   2  14   6 0.36305 1.26058   2
  -2  14   6 0.94896 1.15072   2
  -2 -14  -6 0.28065 0.60398   2
   2 -14  -7 1.20824 0.62868   2
  -2 -14  -7-0.36316 0.60081   2
   2 -14  -8 3.36822 0.64218   2
  -2 -14  -8 2.30341 0.63009   2
   2 -14  -9 4.07646 0.64422   2
  -2 -14  -9 3.26443 0.64427   2
   2 -14 -10 1.17402 0.62150   2
  -2 -14 -10 0.54076 0.63465   2
   2 -14 -11 1.82656 0.64365   2
  -2 -14 -11-0.38899 0.61412   2
   2 -14 -12 0.50032 0.62986   2
  -2 -14 -12 0.10538 0.61285   2
  -2 -14 -13 2.48230 0.64720   2
   2 -14 -13 3.56829 0.66002   2
  -2 -14 -14 0.62641 0.67805   2
   2 -14 -14 1.44126 0.69519   2
  -2 -14 -15 6.32765 0.78806   2
  -2 -14  15 6.60760 1.10715   1
   2 -14 -15 7.05948 0.75477   2
  -2 -14  16 2.37656 1.07138   1
   2 -14 -16 2.73453 0.71073   2
  -2 -14 -16 1.60565 0.64886   2
  -2 -14 -17-0.66525 0.73010   2
   2 -14 -17 0.85147 0.72757   2
   2 -14 -18 9.99396 0.90819   2
  -2 -14 -18 10.1472 0.89105   2
   2 -14 -19 0.49445 0.71896   2
  -2 -14 -19-0.20263 0.67400   2
  -2 -14 -20-0.34883 0.70529   2
   2 -14 -20 0.79929 0.71829   2
  -2 -14 -21 4.69855 0.80825   2
   2 -14 -21 4.92729 0.78741   2
   2 -14 -22 0.44815 0.73898   2
  -2 -14 -22 0.74424 0.72202   2
   2 -14 -23-0.27261 0.73672   2
  -2 -14 -23-0.56541 0.76246   2
  -2 -14 -24 1.27411 0.75011   2
   2 -14 -24 1.48073 0.78512   2
   2 -14 -25 2.99305 0.81781   2
  -2 -14 -25 2.22268 0.83536   2
   2 -14 -26 2.47907 0.81785   2
  -2 -14 -26-0.05672 0.82093   2
   2 -14 -27-0.23260 0.82151   2
  -2 -14 -27 0.67737 0.81104   2
   2 -14 -28-0.51968 0.85139   2
  -2 -14 -28-0.51132 0.83463   2
   2 -15   0 3.40711 0.87318   2
  -2 -15   0 2.56840 0.84186   2
   2 -15  -1 1.94025 0.82893   2
  -2 -15  -1 2.79637 0.79734   2
  -2 -15   1 0.14225 0.88721   2
   2 -15   1 0.86375 0.94473   2
  -2 -15  -2 0.44571 0.72240   2
   2 -15  -2 1.15641 0.74266   2
  -2 -15   2 0.01674 0.89766   2
   2 -15   2 0.90600 0.97553   2
   2 -15  -3 0.88859 0.69573   2
  -2 -15   3 0.62593 0.99023   2
   2 -15   3 0.61009 0.97336   2
  -2 -15  -3-0.14316 0.67766   2
   2 -15  -4 3.22729 0.72342   2
  -2 -15  -4 2.95829 0.69038   2
   2 -15   4 4.47542 1.14640   2
  -2 -15   4 1.59956 1.04252   2
   2 -15  -5 1.29274 0.68002   2
  -2 -15  -5 0.44181 0.67381   2
   2 -15  -6 3.74363 0.69084   2
  -2 -15  -6 1.39730 0.68911   2
  -2 -15  -7 2.83960 0.68605   2
   2 -15  -7 3.79811 0.69461   2
  -2 -15  -8-0.79585 0.61512   2
   2 -15  -8 1.20200 0.62215   2
  -2 -15  -9-0.15912 0.66219   2
   2 -15  -9 0.33816 0.67582   2
   2 -15 -10 0.04405 0.61705   2
  -2 -15 -10-0.72228 0.61589   2
   2 -15 -11 3.34389 0.69721   2
  -2 -15 -11 3.38796 0.68550   2
  -2 -15 -12 1.55433 0.68320   2
   2 -15 -12 1.02620 0.68561   2
  -2 -15 -13 5.55111 0.73864   2
   2 -15 -13 5.38435 0.75099   2
   2 -15 -14 0.62320 0.70752   2
  -2 -15 -14 1.15106 0.70301   2
   2 -15 -15 4.13175 0.73439   2
  -2 -15 -15 2.31120 0.67678   2
   2 -15 -16 4.77234 0.77710   2
  -2 -15 -16 4.03176 0.77299   2
  -2 -15 -17 1.99115 0.73895   2
   2 -15 -17 2.22570 0.73257   2
   2 -15 -18 2.02793 0.75141   2
  -2 -15 -18 1.98892 0.70214   2
  -2 -15 -19 1.00423 0.72210   2
   2 -15 -19 0.83116 0.71731   2
  -2 -15 -20 0.58712 0.73645   2
   2 -15 -20 1.41175 0.74843   2
   2 -15 -21 3.02442 0.78076   2
  -2 -15 -21 0.79249 0.77578   2
  -2 -15 -22 0.25401 0.74782   2
   2 -15 -22 1.42562 0.75057   2
   2 -15 -23 3.57340 0.81987   2
  -2 -15 -23 2.19821 0.78883   2
  -2 -15 -24-0.05621 0.80583   2
   2 -15 -24 0.83234 0.77660   2
   2 -15 -25 0.86308 0.81869   2
  -2 -15 -25 0.51041 0.80663   2
  -2 -15 -26 0.20656 0.79364   2
   2 -15 -26-0.58293 0.83832   2
  -2 -15 -27-0.21021 0.88192   2
   2 -15 -27 0.19272 0.85797   2
  -2 -16   0 2.45437 0.90122   2
   2 -16   0 3.73809 0.90335   2
   2 -16   1 2.65905 0.95140   2
  -2 -16  -1 0.76556 0.79722   2
  -2 -16   1 2.19643 0.90514   2
   2 -16  -1 1.74284 0.78658   2
   2 -16  -2 1.10068 0.79441   2
  -2 -16  -2 0.96850 0.76007   2
   2 -16   2 1.76664 0.97549   2
  -2 -16   2 1.46589 0.99642   2
  -2 -16  -3 0.64888 0.71096   2
  -2 -16   3-2.20854 1.03647   2
   2 -16   3-1.01551 1.01611   2
   2 -16  -3 0.66026 0.71621   2
  -2 -16   4-1.13314 1.07096   2
   2 -16   4-0.25502 1.10590   2
  -2 -16  -4 0.14822 0.67600   2
   2 -16  -4 1.19416 0.71868   2
  -2 -16  -5-0.35841 0.73280   2
   2 -16   5 0.14575 1.20237   2
   2 -16  -5 1.52276 0.70035   2
  -2 -16   5 1.24262 1.11542   2
   2 -16  -6 5.02634 0.76662   2
  -2 -16  -6 3.12677 0.73803   2
   2 -16  -7 3.53424 0.72081   2
  -2 -16  -7 1.29846 0.68268   2
   2 -16  -8 1.72959 0.66109   2
  -2 -16  -8 0.62022 0.66798   2
   2 -16  -9 1.72476 0.69346   2
  -2 -16  -9 1.06197 0.72946   2
  -2 -16 -10 3.68004 0.71283   2
   2 -16 -10 5.50346 0.71567   2
  -2 -16 -11 1.29053 0.73694   2
   2 -16 -11-0.34998 0.69796   2
  -2 -16 -12 0.57842 0.71416   2
   2 -16 -12 1.68258 0.73484   2
   2 -16 -13 0.35084 0.72179   2
  -2 -16 -13 0.50998 0.68497   2
   2 -16 -14-0.01224 0.69830   2
  -2 -16 -14-0.76653 0.71063   2
  -2 -16 -15 5.77698 0.78445   2
   2 -16 -15 5.51970 0.79895   2
   2 -16 -16 1.61506 0.75357   2
  -2 -16 -16 1.48245 0.72331   2
   2 -16 -17-0.20287 0.75535   2
  -2 -16 -17 0.49916 0.74723   2
   2 -16 -18 2.11656 0.80050   2
  -2 -16 -18 0.69024 0.73809   2
   2 -16 -19-0.43021 0.74688   2
  -2 -16 -19 1.12048 0.74035   2
  -2 -16 -20 0.30489 0.73903   2
   2 -16 -20 2.25347 0.76242   2
  -2 -16 -21-0.06840 0.76944   2
   2 -16 -21 1.42020 0.77714   2
  -2 -16 -22 0.71806 0.82803   2
   2 -16 -22 2.10015 0.84531   2
  -2 -16 -23 0.90962 0.80641   2
   2 -16 -23-0.47766 0.81032   2
   2 -16 -24 1.31947 0.84430   2
  -2 -16 -24 2.02381 0.79504   2
   2 -16 -25 0.95094 0.85829   2
  -2 -16 -25 0.38487 0.81361   2
   2 -16 -26-0.88134 0.85844   2
  -2 -16 -26 0.40807 0.84987   2
  -2 -17   0 8.24872 0.98955   2
   2 -17   0 8.56145 1.04516   2
   2 -17  -1 1.31308 0.83566   2
  -2 -17   1 0.91994 0.90331   2
   2 -17   1 0.53618 0.90207   2
  -2 -17  -1-0.55211 0.83945   2
  -2 -17   2 0.10859 0.94148   2
   2 -17   2 1.76101 0.99082   2
   2 -17  -2 1.92591 0.79288   2
  -2 -17  -2 0.94925 0.75655   2
  -2 -17   3 0.59002 0.99634   2
   2 -17  -3 2.47890 0.77835   2
   2 -17   3-0.07643 1.03795   2
  -2 -17  -3-0.09393 0.72376   2
   2 -17   4 2.30501 1.07712   2
  -2 -17   4 1.12741 1.06258   2
   2 -17  -4 2.32753 0.74609   2
  -2 -17  -4 0.22086 0.73252   2
   2 -17  -5 0.92684 0.72903   2
  -2 -17   5 0.47151 1.13312   2
  -2 -17  -5-0.22272 0.70141   2
   2 -17   5 0.99139 1.21547   2
  -2 -17  -6 3.15417 0.76917   2
   2 -17  -6 4.43254 0.75242   2
  -2 -17  -7 7.58622 0.88404   2
   2 -17  -7 8.08964 0.89831   2
   2 -17  -8 4.12745 0.78540   2
  -2 -17  -8 2.51858 0.75850   2
  -2 -17  -9 1.25985 0.73429   2
   2 -17  -9 0.07585 0.74457   2
  -2 -17 -10 2.01751 0.72935   2
   2 -17 -10 1.95514 0.74378   2
  -2 -17 -11 0.71621 0.73085   2
   2 -17 -11 2.99248 0.79180   2
   2 -17 -12 4.62890 0.84262   2
  -2 -17 -12 5.67899 0.84194   2
  -2 -17 -13 9.54541 0.94090   2
   2 -17 -13 10.8296 0.91884   2
  -2 -17 -14 1.32594 0.77213   2
   2 -17 -14 1.70889 0.78200   2
   2 -17 -15 11.8412 1.03176   2
  -2 -17 -15 11.2750 1.05557   2
   2 -17 -16 0.05207 0.74751   2
  -2 -17 -16 0.43394 0.76443   2
   2 -17 -17 0.18607 0.76752   2
  -2 -17 -17-1.22214 0.77986   2
   2 -17 -18 0.79698 0.78612   2
  -2 -17 -18 0.41643 0.78737   2
   2 -17 -19-0.56493 0.76856   2
  -2 -17 -19-0.79358 0.77110   2
  -2 -17 -20 1.47772 0.79596   2
   2 -17 -20 0.90993 0.76759   2
   2 -17 -21-1.00637 0.81594   2
  -2 -17 -21-0.45230 0.79654   2
  -2 -17 -22 1.46926 0.85588   2
   2 -17 -22 2.16556 0.86870   2
  -2 -17 -23 1.76044 0.84015   2
   2 -17 -23 0.53552 0.84372   2
  -2 -17 -24 0.72181 0.82835   2
   2 -17 -24 1.34032 0.86375   2
   2 -17 -25-0.56078 0.88747   2
  -2 -17 -25 1.30340 0.88174   2
  -2 -18   0-0.31288 0.91996   2
   2 -18   0-0.13191 0.89389   2
  -2 -18  -1-0.43244 0.85162   2
  -2 -18   1-1.60366 0.95607   2
   2 -18   1 0.82141 0.95425   2
   2 -18  -1 0.72656 0.83835   2
   2 -18  -2 2.49796 0.82637   2
  -2 -18  -2 1.17511 0.82408   2
   2 -18   2 2.92131 1.08283   2
  -2 -18   2 2.08585 1.03325   2
   2 -18   3 1.83939 1.14456   2
  -2 -18   3 1.26384 1.06815   2
  -2 -18  -3 1.15973 0.79945   2
   2 -18  -3 0.91815 0.78833   2
  -2 -18  -4 1.36103 0.80136   2
   2 -18   4 2.23949 1.16055   2
   2 -18  -4 2.48438 0.81311   2
  -2 -18   4 0.63990 1.11814   2
  -2 -18   5-1.88904 1.24876   2
   2 -18  -5 1.60219 0.80459   2
   2 -18   5 1.58991 1.24950   2
  -2 -18  -5-0.96965 0.81690   2
   2 -18  -6 2.08942 0.80184   2
  -2 -18   6 0.67232 1.25843   2
  -2 -18  -6 1.89062 0.79261   2
   2 -18   6 1.79589 1.30410   2
   2 -18  -7 1.16502 0.81048   2
  -2 -18  -7 1.29253 0.78504   2
   2 -18  -8 0.58876 0.77817   2
  -2 -18  -8 0.44386 0.78959   2
  -2 -18  -9 1.39507 0.74282   2
   2 -18  -9 0.55477 0.73358   2
  -2 -18 -10 0.76922 0.70423   2
   2 -18 -10 0.55699 0.71647   2
  -2 -18 -11-0.73492 0.75915   2
   2 -18 -11 0.26536 0.76228   2
   2 -18 -12 2.25134 0.83884   2
  -2 -18 -12 0.77939 0.80643   2
   2 -18 -13 1.18381 0.76541   2
  -2 -18 -13-0.28157 0.73596   2
  -2 -18 -14 0.55289 0.75934   2
   2 -18 -14-0.03916 0.77527   2
   2 -18 -15-0.90254 0.80665   2
  -2 -18 -15-0.02846 0.80334   2
  -2 -18 -16 0.12492 0.77425   2
   2 -18 -16 1.00441 0.78833   2
   2 -18 -17 0.53872 0.79451   2
  -2 -18 -17 0.61367 0.77208   2
   2 -18 -18 0.25346 0.79926   2
  -2 -18 -18 0.17057 0.81666   2
  -2 -18 -19 1.66786 0.89522   2
   2 -18 -19 0.03031 0.87129   2
   2 -18 -20 0.77927 0.80766   2
  -2 -18 -20 1.21025 0.81745   2
  -2 -18 -21-0.01463 0.82677   2
   2 -18 -21-0.34738 0.80368   2
   2 -18 -22 1.03468 0.87802   2
  -2 -18 -22-0.06023 0.83558   2
  -2 -18 -23-0.55188 0.86622   2
   2 -18 -23 1.59185 0.92142   2
  -2 -18 -24 1.24583 0.86211   2
   2 -18 -24 2.24889 0.88473   2
  -2 -19   0 7.57532 1.03573   2
   2 -19   0 7.43693 1.04531   2
   2 -19   1 1.24998 0.98480   2
  -2 -19  -1 0.08022 0.89775   2
   2 -19  -1 3.58133 0.93290   2
  -2 -19   1 0.89060 1.00616   2
  -2 -19  -2 1.61979 0.90204   2
  -2 -19   2 1.34735 1.04832   2
   2 -19  -2 5.42073 0.93589   2
   2 -19   2 3.62354 1.09967   2
   2 -19   3 4.28370 1.10451   2
  -2 -19  -3 2.31923 0.87439   2
  -2 -19   3-1.40182 1.11439   2
   2 -19  -3 0.41599 0.83708   2
   2 -19  -4 1.64549 0.79130   2
   2 -19   4 1.63580 1.18168   2
  -2 -19  -4 0.46257 0.82324   2
  -2 -19   4-0.61315 1.11776   2
   2 -19  -5 1.57524 0.80601   2
   2 -19   5 1.93745 1.27822   2
  -2 -19   5 1.34518 1.16674   2
  -2 -19  -5 2.16351 0.79816   2
   2 -19  -6 1.11727 0.81582   2
  -2 -19  -6 0.41664 0.78560   2
   2 -19   6 1.53904 1.31249   2
  -2 -19   6-1.50603 1.29690   2
  -2 -19   7 1.74626 1.36008   2
   2 -19  -7 0.21400 0.83418   2
  -2 -19  -7-0.21468 0.81285   2
   2 -19   7 1.15601 1.40918   2
   2 -19  -8 0.29565 0.82931   2
  -2 -19  -8 0.15547 0.79229   2
  -2 -19  -9 4.12806 0.85888   2
   2 -19  -9 6.31338 0.86637   2
   2 -19 -10 3.17510 0.87443   2
  -2 -19 -10 0.79291 0.76181   2
  -2 -19 -11 5.63747 0.84050   2
   2 -19 -11 4.71003 0.84414   2
  -2 -19 -12-0.61164 0.81767   2
   2 -19 -12 2.36033 0.82344   2
  -2 -19 -13 1.22395 0.80736   2
   2 -19 -13 1.51256 0.80767   2
   2 -19 -14 2.09299 0.79933   2
  -2 -19 -14 2.38681 0.80248   2
   2 -19 -15 2.54641 0.84989   2
  -2 -19 -15 1.11451 0.83678   2
   2 -19 -16 0.85644 0.83048   2
  -2 -19 -16-0.45385 0.79611   2
   2 -19 -17 3.59472 0.86565   2
  -2 -19 -17 3.49476 0.83809   2
   2 -19 -18 1.59974 0.84508   2
  -2 -19 -18 1.70239 0.82021   2
  -2 -19 -19 2.81465 0.87179   2
   2 -19 -19 3.33563 0.89536   2
   2 -19 -20 0.62275 0.86732   2
  -2 -19 -20-0.27489 0.88432   2
   2 -19 -21 3.18566 0.89251   2
  -2 -19 -21 3.52356 0.92072   2
   2 -19 -22-1.55056 0.89007   2
  -2 -19 -22 0.96089 0.86658   2
  -2 -20   0 2.75357 0.94614   2
   2 -20   0 3.00397 0.99651   2
  -2 -20   1 0.09279 1.02957   2
  -2 -20  -1-1.35736 0.93849   2
   2 -20  -1 0.73873 0.97183   2
  -2 -20  -2-1.24538 0.85400   2
   2 -20   2 1.20760 1.07255   2
  -2 -20   2 1.37792 1.07234   2
   2 -20  -2-0.61519 0.87141   2
   2 -20   3 1.26164 1.15547   2
  -2 -20   3-1.21502 1.13659   2
   2 -20  -3 0.13963 0.89866   2
  -2 -20  -3-0.32584 0.89031   2
   2 -20   4-0.06563 1.26149   2
  -2 -20  -4 0.04547 0.83537   2
  -2 -20   4 1.52987 1.14768   2
   2 -20  -4 0.07575 0.87074   2
   2 -20  -5 0.99138 0.90123   2
  -2 -20   5 1.99000 1.27917   2
   2 -20   5 0.02303 1.28384   2
  -2 -20  -5-0.44302 0.86697   2
   2 -20  -6 2.51596 0.91963   2
   2 -20   6 4.66622 1.46247   2
  -2 -20  -6 2.14318 0.83911   2
  -2 -20   6 2.27435 1.32143   2
  -2 -20   7-0.42363 1.30206   2
  -2 -20  -7 0.41834 0.83762   2
   2 -20  -7 1.25123 0.84871   2
   2 -20   7 2.05858 1.42095   2
   2 -20  -8 7.45786 0.93466   2
  -2 -20   8 1.50843 1.40089   2
   2 -20   8 7.44364 1.50449   2
  -2 -20  -8 5.38059 0.94437   2
  -2 -20  -9 1.18354 0.80016   2
   2 -20  -9 1.28028 0.82177   2
   2 -20 -10 1.01667 0.83976   2
  -2 -20 -10 2.69872 0.85028   2
   2 -20 -11 1.48469 0.84937   2
  -2 -20 -11 0.69533 0.81370   2
  -2 -20 -12-0.03010 0.85322   2
   2 -20 -12 1.82494 0.86212   2
   2 -20 -13 0.86850 0.86536   2
  -2 -20 -13 1.38662 0.85045   2
   2 -20 -14 0.57206 0.79429   2
  -2 -20 -14 0.30243 0.82221   2
   2 -20 -15-0.89513 0.86953   2
  -2 -20 -15 2.14799 0.85934   2
   2 -20 -16 0.38640 0.91481   2
  -2 -20 -16 0.28022 0.84684   2
   2 -20 -17-0.83946 0.86723   2
  -2 -20 -17 0.40803 0.82091   2
  -2 -20 -18-0.27766 0.85833   2
   2 -20 -18 1.08913 0.90651   2
  -2 -20 -19 1.01648 0.89917   2
   2 -20 -19 1.42630 0.90292   2
  -2 -20 -20 0.74915 0.92249   2
   2 -20 -20-1.67961 0.95376   2
  -2 -20 -21 1.47827 0.86950   2
   2 -20 -21-0.23627 0.87797   2
   2 -21   0 1.50419 0.99891   2
  -2 -21   0-1.12529 0.97457   2
  -2 -21   1-1.07572 1.02276   2
   2 -21  -1-0.88344 0.95476   2
  -2 -21  -1-0.39747 0.92842   2
   2 -21   1-1.14186 1.09785   2
   2 -21  -2 0.18132 0.95041   2
  -2 -21   2 3.62974 1.15143   2
   2 -21   2 1.82202 1.09561   2
  -2 -21  -2 0.95501 0.95591   2
   2 -21  -3 1.36080 0.90419   2
   2 -21   3 0.43849 1.13974   2
  -2 -21  -3 2.62450 0.87676   2
  -2 -21   3 2.32784 1.18748   2
   2 -21  -4 4.01789 0.91939   2
   2 -21   4 4.36470 1.28512   2
  -2 -21  -4 3.33426 0.89238   2
  -2 -21   4 5.19218 1.27743   2
   2 -21  -5 0.76887 0.92649   2
   2 -21   5 1.75115 1.30164   2
  -2 -21  -5 0.87605 0.88728   2
  -2 -21   5-1.81044 1.28197   2
   2 -21  -6-0.15685 0.86360   2
  -2 -21  -6 1.24118 0.84007   2
  -2 -21   6 2.46204 1.29073   2
   2 -21   6 1.76954 1.35184   2
   2 -21  -7-0.42162 0.87759   2
  -2 -21   7-1.29367 1.30085   2
   2 -21   7 0.58792 1.38477   2
  -2 -21  -7 0.32870 0.87385   2
  -2 -21   8-0.10670 1.45420   2
   2 -21  -8 0.25944 0.87793   2
  -2 -21  -8-0.21418 0.85356   2
   2 -21   8-1.85485 1.49256   2
   2 -21  -9 0.56326 0.85128   2
  -2 -21   9-0.11215 1.46629   2
  -2 -21  -9-0.93198 0.84822   2
   2 -21   9 2.80004 1.52889   2
   2 -21 -10 1.86743 0.85136   2
  -2 -21 -10 1.21902 0.87130   2
  -2 -21 -11 0.13607 0.84704   2
   2 -21 -11 0.51191 0.85743   2
  -2 -21 -12 1.16119 0.85419   2
   2 -21 -12 2.49753 0.90010   2
  -2 -21 -13 0.89513 0.88318   2
   2 -21 -13 4.62433 0.91622   2
  -2 -21 -14 1.34921 0.82591   2
   2 -21 -14 1.32600 0.82603   2
   2 -21 -15 2.32763 0.87374   2
  -2 -21 -15 0.94601 0.85382   2
  -2 -21 -16-1.78610 0.90686   2
   2 -21 -16 0.26537 0.95137   2
  -2 -21 -17-0.91249 0.85036   2
   2 -21 -17 0.78089 0.87340   2
   2 -21 -18 0.20693 0.91056   2
  -2 -21 -18 0.27268 0.88837   2
  -2 -21 -19 2.41197 0.91165   2
   2 -21 -19-2.02483 0.92756   2
  -2 -22   0 1.41564 1.00593   2
   2 -22   0 4.16944 1.08172   2
  -2 -22   1-0.41918 1.03787   2
   2 -22   1 2.06519 1.05838   2
  -2 -22  -1 0.75875 0.95629   2
   2 -22  -1 0.90194 0.97907   2
  -2 -22   2 2.21564 1.08346   2
  -2 -22  -2 0.83808 0.94194   2
   2 -22   2 3.48111 1.15092   2
   2 -22  -2 3.10234 0.96675   2
   2 -22  -3 0.83307 0.90828   2
   2 -22   3-0.23256 1.17448   2
  -2 -22   3-0.73601 1.10009   2
  -2 -22  -3 0.69884 0.93554   2
  -2 -22  -4 2.92981 0.95250   2
   2 -22  -4 3.84587 0.93318   2
  -2 -22   4 1.81425 1.19024   2
   2 -22   4 1.68992 1.21831   2
   2 -22  -5 1.11777 0.95001   2
   2 -22   5 0.71726 1.28058   2
  -2 -22   5 1.33009 1.29967   2
  -2 -22  -5-0.75800 0.94317   2
  -2 -22  -6-0.67288 0.91242   2
   2 -22  -6 0.57411 0.91138   2
  -2 -22   6-0.14645 1.27284   2
   2 -22   6-0.12294 1.35968   2
  -2 -22   7 0.23151 1.36351   2
   2 -22  -7-0.25944 0.87698   2
   2 -22   7-0.90692 1.35071   2
  -2 -22  -7 1.52681 0.87392   2
   2 -22   8 0.48591 1.48579   2
  -2 -22  -8 0.81530 0.87526   2
   2 -22  -8 0.38278 0.87056   2
  -2 -22   8-1.63289 1.37477   2
  -2 -22   9-1.21169 1.51774   2
   2 -22  -9 0.68390 0.89293   2
   2 -22   9 2.50071 1.56424   2
  -2 -22  -9 2.35946 0.89949   2
  -2 -22 -10 0.01590 0.87446   2
   2 -22 -10-0.34851 0.90173   2
   2 -22  10 1.25751 1.64271   2
  -2 -22  10 0.80084 1.57967   2
  -2 -22 -11 1.00853 0.89935   2
   2 -22 -11 0.75337 0.89386   2
  -2 -22 -12 0.39198 0.91638   2
   2 -22 -12 1.81241 0.92890   2
   2 -22 -13-0.41291 0.93474   2
  -2 -22 -13-0.47363 0.89363   2
  -2 -22 -14-0.88805 0.84006   2
   2 -22 -14 0.20424 0.91156   2
  -2 -22 -15-1.39599 0.87509   2
   2 -22 -15 0.42605 0.92819   2
   2 -22 -16 0.85977 0.98518   2
  -2 -22 -16-0.79685 0.95136   2
   2 -22 -17 0.81891 0.92580   2
  -2 -22 -17 0.90674 0.92774   2
   2 -23   0 2.06610 1.08292   2
  -2 -23   0 1.85145 1.01375   2
   2 -23   1 1.08048 1.09189   2
   2 -23  -1-0.21772 1.03202   2
  -2 -23   1 0.43049 1.02422   2
  -2 -23  -1-0.23339 0.96719   2
   2 -23   2 0.38903 1.13216   2
  -2 -23  -2 1.01789 0.96394   2
   2 -23  -2-0.08896 0.99541   2
  -2 -23   2 2.05743 1.06214   2
  -2 -23  -3 0.72578 0.94682   2
  -2 -23   3-0.99201 1.16437   2
   2 -23   3-0.45548 1.20989   2
   2 -23  -3-0.19126 0.97889   2
   2 -23  -4 0.97852 0.98566   2
  -2 -23   4-0.89776 1.16037   2
  -2 -23  -4 2.16721 0.97844   2
   2 -23   4-0.56467 1.25551   2
   2 -23  -5-1.06914 0.97310   2
  -2 -23   5 1.88864 1.26746   2
  -2 -23  -5-0.18897 0.95592   2
   2 -23   5 1.58882 1.29754   2
  -2 -23   6-2.89220 1.35333   2
   2 -23  -6-0.39418 0.96139   2
   2 -23   6-0.30365 1.38678   2
  -2 -23  -6 0.68329 0.94891   2
  -2 -23   7 0.41747 1.38714   2
  -2 -23  -7-1.25850 0.92951   2
   2 -23  -7 0.13415 0.95106   2
   2 -23   7-0.47315 1.40041   2
   2 -23   8-1.88343 1.42692   2
  -2 -23   8-0.75816 1.40534   2
  -2 -23  -8 1.82525 0.92159   2
   2 -23  -8 1.55715 0.92697   2
  -2 -23  -9 1.40630 0.91062   2
  -2 -23   9-1.38281 1.45000   2
   2 -23  -9 0.70196 0.94420   2
   2 -23   9 1.62242 1.56151   2
  -2 -23 -10 0.89251 0.87409   2
   2 -23 -10 1.58674 0.91519   2
  -2 -23  10 0.61724 1.51044   2
   2 -23  10 1.27608 1.61148   2
   2 -23  11 3.77689 1.68978   2
   2 -23 -11 0.78439 0.90628   2
  -2 -23 -11-0.60630 0.89414   2
  -2 -23  11 1.29864 1.60820   2
  -2 -23 -12-0.49241 0.95060   2
   2 -23 -12 1.73311 0.95518   2
   2 -23  12 0.70293 1.66588   2
  -2 -23  12-1.20215 1.64694   2
   2 -23 -13 0.18877 0.96098   2
  -2 -23 -13 0.46532 0.98427   2
  -2 -23 -14 0.26221 0.91158   2
   2 -23 -14-0.08156 0.92042   2
  -2 -23 -15 1.23410 0.93596   2
   2 -23 -15 0.72033 0.91384   2
   2 -24   0 2.06471 1.08964   2
  -2 -24   0 0.88387 1.02352   2
   2 -24  -1-0.05624 1.04747   2
  -2 -24  -1-0.54195 1.01551   2
   2 -24   1 0.04031 1.08519   2
  -2 -24   1 0.72249 1.02388   2
   2 -24  -2-0.20087 1.02505   2
  -2 -24   2 2.16716 1.14312   2
   2 -24   2 0.58665 1.16571   2
  -2 -24  -2 1.52929 1.00983   2
   2 -24   3 0.28398 1.20932   2
   2 -24  -3-1.22780 0.99775   2
  -2 -24  -3-2.59375 0.98979   2
  -2 -24   3 0.45622 1.13207   2
   2 -24   4-0.13696 1.26979   2
   2 -24  -4 0.65352 0.98759   2
  -2 -24   4 1.22449 1.24568   2
  -2 -24  -4 0.63456 0.95640   2
  -2 -24   5 0.40366 1.20891   2
   2 -24  -5 1.39367 1.01973   2
   2 -24   5 2.31982 1.30939   2
  -2 -24  -5-0.41045 0.92791   2
  -2 -24  -6-0.53085 0.98036   2
  -2 -24   6-0.66320 1.34454   2
   2 -24  -6 0.60201 1.02767   2
   2 -24   6 1.33667 1.40516   2
   2 -24   7-1.72602 1.40099   2
  -2 -24  -7 1.70910 0.93841   2
   2 -24  -7 0.50701 0.98492   2
  -2 -24   7-0.31623 1.41159   2
   2 -24  -8 0.91463 0.99288   2
  -2 -24  -8 0.70797 0.96383   2
  -2 -24   8 1.20570 1.41368   2
   2 -24   8 0.13813 1.42908   2
  -2 -24   9 1.22458 1.53578   2
  -2 -24  -9-0.33091 0.95890   2
   2 -24  -9 1.07867 0.99814   2
   2 -24   9 0.14364 1.48971   2
  -2 -24  10 0.92087 1.54626   2
   2 -24 -10 1.93681 0.94325   2
   2 -24  10 0.14990 1.51753   2
  -2 -24 -10-0.67474 0.92480   2
   2 -24 -11-0.95118 0.94211   2
  -2 -24  11-2.13744 1.64264   2
  -2 -24 -11 0.79998 0.91602   2
   2 -24  11 1.62648 1.65786   2
  -2 -24  12-1.30428 1.68984   2
   2 -24 -12-0.68520 0.98747   2
  -2 -24 -12 2.02690 0.95645   2
   2 -24  12 2.70222 1.80514   2
   2 -24  13 2.32902 1.79515   2
  -2 -24  13 0.93468 1.70604   2
   2 -25   0-0.82196 1.08297   2
  -2 -25   0 0.35064 1.05058   2
  -2 -25  -1-1.05718 1.05789   2
   2 -25   1-0.10327 1.09225   2
  -2 -25   1 1.31499 1.10431   2
   2 -25  -1 0.11580 1.07502   2
  -2 -25  -2 1.61358 0.99561   2
   2 -25   2 1.24359 1.20018   2
  -2 -25   2-0.16883 1.15114   2
   2 -25  -2 1.12905 0.99662   2
  -2 -25  -3 1.41262 1.02287   2
  -2 -25   3 1.40632 1.17041   2
   2 -25  -3-0.90421 1.06476   2
   2 -25   3 1.61339 1.19572   2
   2 -25   4 0.62589 1.28426   2
  -2 -25   4 1.08206 1.17566   2
   2 -25  -4-0.11292 1.06959   2
  -2 -25  -4 0.86370 1.02044   2
  -2 -25  -5-2.45337 0.99289   2
  -2 -25   5 1.47187 1.32966   2
   2 -25  -5 0.62827 1.01833   2
   2 -25   5-0.80174 1.29320   2
  -2 -25   6 1.20379 1.37306   2
   2 -25  -6 0.84349 1.02451   2
  -2 -25  -6 1.37364 0.97120   2
   2 -25   6 2.90547 1.39566   2
  -2 -25   7-0.74780 1.42333   2
   2 -25  -7-0.23597 1.00224   2
  -2 -25  -7 0.27225 0.99862   2
   2 -25   7-0.21533 1.43004   2
   2 -25   8 0.25077 1.46548   2
  -2 -25   8-3.25887 1.47114   2
  -2 -25  -8-0.37557 0.96790   2
   2 -25  -8-0.62561 0.99213   2
  -2 -25   9 0.46012 1.49219   2
   2 -25  -9 1.87291 0.99357   2
   2 -25   9 0.55122 1.54875   2
  -2 -25  -9 0.91885 0.96574   2
  -2 -26   0 1.38783 1.07424   2
   2 -26   0-0.64651 1.10864   2
  -2 -26  -1 0.35400 1.08255   2
   2 -26   1 0.37693 1.15154   2
  -2 -26   1 0.52090 1.14889   2
   2 -26  -1 0.94769 1.07074   2
  -2 -26  -2 0.09707 1.04132   2
   2 -26   2 0.73779 1.17109   2
  -2 -26   2-0.86272 1.13352   2
   2 -26  -2 0.29220 1.07935   2
  -3   0   0 0.95309 0.88286   3
  -3   0   0 1.03995 0.54654   1
   3   0   0 1.28761 0.84476   3
   3   0   1 394.488 22.1804   3
   3   0  -1 448.896 22.1795   3
   3   0  -1 400.349 22.1521   1
  -3   0  -1 482.999 22.1570   1
  -3   0   1 426.422 22.1580   1
  -3   0  -1 404.272 22.1842   3
  -3   0  -2 1.20264 0.57810   1
  -3   0   2 1.57790 0.58643   1
   3   0   2 1.22142 0.40839   1
   3   0  -2 1.00832 0.44368   1
   3   0  -2 1.09944 0.87430   3
  -3   0  -3 460.239 24.0837   2
   3   0  -3 449.006 24.1270   3
   3   0  -3 470.680 24.0839   2
  -3   0   3 454.861 24.0841   2
   3   0   3 475.921 24.0842   2
  -3   0   3 469.100 24.1143   1
   3   0  -3 450.388 24.1097   1
   3   0   3 480.231 24.0995   1
  -3   0  -3 477.469 24.1016   1
   3   0   4-0.00907 0.19912   2
   3   0  -4-0.09786 0.17627   2
  -3   0  -4-0.34074 0.40844   1
   3   0  -4-1.00742 0.80661   3
   3   0  -4-0.49923 0.44750   1
  -3   0   4 0.21115 0.20191   2
  -3   0  -4-0.06435 0.17400   2
  -3   0   4-0.12589 0.56367   3
   3   0   4 0.13881 0.33470   1
  -3   0   5 0.88598 0.57322   3
   3   0  -5 1.22166 0.75408   3
   3   0  -5 2.15234 0.47833   1
   3   0  -5 1.78184 0.22534   2
  -3   0  -5 1.16746 0.37962   1
   3   0   5 0.93751 0.87010   3
  -3   0   5 2.06847 0.24742   2
  -3   0  -5 1.72604 0.23383   2
   3   0   5 2.13875 0.30704   1
   3   0   5 1.68200 0.24659   2
   3   0   6 0.62859 0.77885   3
   3   0  -6-0.02159 0.49128   1
   3   0  -6-0.07074 0.69778   3
  -3   0   6 0.00465 0.60008   3
  -3   0  -6 0.15531 0.21692   2
  -3   0  -6-0.87151 0.33880   1
   3   0  -6-0.00787 0.21700   2
   3   0   6-0.08681 0.23061   1
   3   0   6-0.09706 0.25258   2
  -3   0   6 0.16111 0.24609   2
  -3   0  -7 152.786 8.04535   1
   3   0  -7 154.165 8.08402   3
  -3   0  -7 165.932 8.04534   2
   3   0  -7 153.515 8.04466   2
  -3   0   7 161.010 8.09000   1
  -3   0   7 137.754 8.07633   3
   3   0   7 160.425 8.04450   2
   3   0   7 159.112 8.10771   3
  -3   0   7 150.897 8.04385   2
   3   0  -7 149.824 8.07582   1
   3   0   8 0.12265 0.27679   2
  -3   0   8 0.16074 0.62294   3
  -3   0  -8 0.10582 0.23522   2
  -3   0  -8-0.24115 0.30046   1
   3   0  -8-0.00541 0.26658   2
  -3   0   8 0.39275 0.29351   2
   3   0  -8 0.29689 0.48641   1
   3   0   8-0.28808 0.82661   3
  -3   0  -9 0.13001 0.26514   1
   3   0  -9 0.69304 0.48793   1
   3   0   9 0.97112 0.30174   2
   3   0   9 0.32125 0.76802   3
  -3   0  -9 0.56526 0.28319   2
  -3   0   9 0.43790 0.30177   2
  -3   0   9 0.16358 0.64914   3
   3   0  -9 0.45968 0.26532   2
  -3   0  10-0.31016 0.32768   2
  -3   0 -10-0.29898 0.28172   2
   3   0  10-0.12031 0.32980   2
   3   0 -10-0.91143 0.47684   1
   3   0  10-0.61146 0.75996   3
   3   0 -10-0.52828 0.29666   2
   3   0 -11 148.135 7.42522   2
  -3   0  11 137.821 7.42480   2
   3   0  11 144.535 7.47834   3
   3   0 -11 138.416 7.45539   1
  -3   0 -11 145.538 7.42610   2
   3   0  11 142.966 7.42470   2
   3   0  12 0.00708 0.79621   3
   3   0 -12-0.24419 0.31368   2
  -3   0 -12-0.71943 0.32535   2
  -3   0  12-0.24647 0.35948   2
   3   0 -12-1.14463 0.56517   1
   3   0  12 0.08317 0.35703   2
  -3   0  13 140.957 7.75107   2
   3   0  13 147.602 7.79526   3
  -3   0 -13 152.270 7.75254   2
   3   0  13 147.106 7.75201   2
   3   0 -13 160.758 7.75418   2
   3   0 -13 145.474 7.78655   1
   3   0  14-0.38236 0.36777   2
   3   0  14-0.64843 0.66637   3
  -3   0 -14-0.51585 0.35435   2
  -3   0  14-0.01365 0.36162   2
   3   0 -14-1.51470 0.58573   1
   3   0 -14-0.70017 0.37619   2
  -3   0 -15 70.1826 3.51197   2
   3   0  15 66.2276 3.51133   2
   3   0  15 65.5392 3.56415   3
   3   0 -15 68.7767 3.51085   2
   3   0 -15 64.8947 3.55624   1
  -3   0  15 64.5331 3.51238   2
  -3   0  16 0.14986 0.38486   2
   3   0  16-0.59609 0.38575   2
  -3   0 -16 0.06151 0.39145   2
   3   0 -16 0.73678 0.61147   1
   3   0  16-0.26198 0.64057   3
   3   0 -16-0.43164 0.36627   2
  -3   0  17 0.04345 0.36655   2
   3   0 -17-0.28455 0.38940   2
   3   0  17-0.21052 0.61178   3
  -3   0 -17-0.11082 0.39457   2
   3   0  17-0.22834 0.39084   2
   3   0 -17-0.01676 0.63988   1
   3   0  18-0.44919 0.39256   2
   3   0 -18 0.05046 0.40617   2
  -3   0  18 0.39538 0.39344   2
  -3   0 -18-0.10331 0.40439   2
   3   0 -18 1.17142 0.64947   1
   3   0  18-0.89280 0.60753   3
   3   0 -19 1.20995 0.44760   2
   3   0 -19 2.47471 0.69075   1
  -3   0 -19 1.69216 0.44494   2
   3   0 -20 0.35641 0.71481   1
  -3   0 -20-0.12138 0.43468   2
   3   0 -20-0.07675 0.45297   2
  -3   0 -21 0.40427 0.47564   2
   3   0 -21 0.10079 0.74814   1
   3   0 -21 0.97593 0.47482   2
   3   0 -22 0.40584 0.52005   2
   3   0 -22 0.15751 0.76741   1
  -3   0 -22 1.05716 0.52347   2
   3   0 -23 6.90793 0.92100   1
  -3   0 -23 7.21093 0.69934   2
   3   0 -23 7.89149 0.69562   2
   3   0 -24-0.59301 0.83651   1
   3   0 -24-1.29345 0.58322   2
  -3   0 -24-0.44760 0.59953   2
  -3   0 -25 1.47442 0.64907   2
   3   0 -25 1.73175 0.67503   2
   3   0 -26 0.07722 0.72677   2
  -3   0 -26-2.12272 0.71222   2
  -3   0 -27 8.78338 0.88708   2
   3   0 -27 9.20359 0.89855   2
   3   0 -28 0.09074 0.70432   2
  -3   0 -28 0.65022 0.72418   2
   3   0 -29 1.06020 0.73555   2
  -3   0 -29 1.33103 0.72753   2
   3   0 -30 1.03847 0.72034   2
  -3   0 -30-0.41072 0.75663   2
   3   0 -31 0.13464 0.75289   2
  -3   0 -31-0.52626 0.77130   2
   3   0 -32 0.78148 0.79461   2
  -3   0 -32 0.90310 0.79661   2
   3   0 -33 0.96199 0.83588   2
  -3   0 -33 0.48565 0.84017   2
   3   1   0 110.058 5.65398   3
  -3  -1   0 102.307 5.67913   3
  -3  -1   0 108.647 5.61289   1
  -3  -1   1 42.8905 1.96420   1
  -3  -1  -1 36.2959 1.95050   1
  -3  -1  -1 39.0923 2.15876   3
   3   1  -1 39.3678 1.93300   1
   3   1  -1 41.0626 2.04862   3
   3  -1  -1 25.9452 1.93715   1
   3   1   1 32.1008 2.06158   3
  -3   1   2 21.4564 1.25955   2
   3   1   2 23.9818 1.25749   2
   3   1  -2 21.3278 1.34611   1
  -3  -1   2 26.0499 1.25480   2
   3  -1  -2 20.8156 1.52289   3
   3   1  -2 22.7697 1.50247   3
   3  -1  -2 23.5878 1.25072   2
   3  -1   2 22.5582 1.32036   1
   3  -1  -2 18.3206 1.34813   1
  -3  -1  -2 20.2482 1.35314   1
  -3  -1  -2 26.1293 1.61738   3
   3  -1   2 26.1206 1.25263   2
  -3  -1   2 24.3272 1.38218   1
   3  -1  -3 5.71949 0.33343   2
   3   1  -3 4.27657 0.89172   3
  -3   1   3 5.49873 0.35905   2
   3   1   3 5.73004 0.35471   2
  -3  -1   3 5.56479 0.33462   2
  -3  -1  -3 3.96407 0.99953   3
  -3  -1  -3 5.36649 0.56482   1
   3   1  -3 5.31321 0.56016   1
   3  -1  -3 5.03574 0.83474   3
  -3  -1   3 4.69729 0.65075   1
   3  -1   3 6.09410 0.33625   2
  -3  -1  -3 5.02641 0.33377   2
   3  -1   3 5.56588 0.49456   1
   3  -1  -3 4.57350 0.59512   1
   3   1   3 4.87264 0.44617   1
   3   1  -4 15.3458 1.05848   1
  -3   1  -4 18.3553 0.94856   2
   3  -1  -4 16.5124 0.94876   2
   3   1  -4 19.2126 0.94788   2
   3   1   4 18.8552 0.95919   2
  -3  -1  -4 18.3907 1.32831   3
  -3  -1   4 16.8528 1.21238   3
   3   1   4 18.2681 0.99346   1
  -3   1   4 17.9354 0.95801   2
   3  -1  -4 17.0796 1.08303   1
  -3  -1   4 17.6581 0.94961   2
  -3  -1  -4 16.8638 0.95068   2
   3  -1   4 18.4477 1.01077   1
   3  -1  -4 11.3469 1.10326   3
  -3  -1  -4 16.5886 1.02195   1
   3  -1   4 18.9800 0.95044   2
  -3  -1  -5 0.02462 0.19653   2
  -3   1  -5-0.16812 0.21004   2
   3   1  -5-0.14677 0.21722   2
   3   1   5 0.19865 0.23684   2
   3  -1  -5 0.47294 0.50460   1
   3   1   5-0.81038 0.82089   3
  -3   1   5-0.00368 0.25268   2
  -3  -1   5 0.02221 0.21877   2
   3  -1  -5-1.10939 0.70629   3
  -3  -1  -5 0.13846 0.81265   3
   3  -1   5-0.05794 0.33930   1
   3  -1   5 0.08539 0.22441   2
   3  -1  -5 0.21296 0.21028   2
   3   1  -5 1.01206 0.43265   1
  -3  -1   5 0.09595 0.74309   3
  -3  -1  -5 0.21656 0.37936   1
   3  -1   6 15.4792 0.94916   1
   3   1   6 17.8093 1.23003   3
   3  -1  -6 17.1341 0.93259   2
  -3   1  -6 20.0419 0.94493   2
   3   1  -6 15.2922 1.04281   1
  -3  -1  -6 15.6592 0.97007   1
  -3  -1  -6 18.1541 0.93200   2
  -3  -1   6 18.2530 1.22181   3
   3  -1   6 16.5108 0.93558   2
  -3   1   6 17.6562 0.94760   2
   3   1  -6 20.3403 0.94599   2
   3  -1  -6 15.5240 1.06496   1
   3   1   6 16.7588 0.94566   2
  -3  -1  -6 15.1298 1.17262   3
  -3  -1   6 16.2060 0.93759   2
   3  -1  -6 16.1849 1.16621   3
   3  -1  -7 1.72734 0.53406   1
   3  -1  -7 2.18047 0.26278   2
  -3   1   7 2.71235 0.31117   2
  -3  -1   7 1.42309 0.72694   3
  -3   1  -7 2.33520 0.27167   2
   3  -1  -7 1.37095 0.72699   3
   3   1   7 1.19741 0.80029   3
   3  -1   7 2.30214 0.27892   1
  -3  -1   7 1.82172 0.28623   2
   3  -1   7 2.27984 0.28882   2
   3   1  -7 2.35372 0.26918   2
  -3  -1  -7 1.77685 0.27351   2
  -3  -1   7 1.47586 0.62343   1
  -3  -1  -7 1.53388 0.34912   1
   3   1  -7 2.36541 0.52324   1
  -3  -1  -7 1.63602 0.83204   3
   3   1   7 2.23647 0.29986   2
  -3   1  -8 7.48339 0.49945   2
   3   1  -8 8.39917 0.49873   2
   3   1   8 7.97932 0.51110   2
   3   1   8 7.59437 0.87922   3
  -3  -1  -8 8.64797 0.50544   2
  -3  -1   8 8.27775 0.77086   1
   3  -1  -8 8.87316 0.77879   3
   3  -1   8 7.20508 0.47298   1
   3  -1   8 8.56894 0.51784   2
  -3  -1  -8 7.36400 0.51854   1
  -3   1   8 8.15570 0.52336   2
   3  -1  -8 7.66754 0.71807   1
   3  -1  -8 8.58862 0.51065   2
  -3  -1   8 7.91835 0.82233   3
  -3  -1   8 7.67560 0.51737   2
   3   1  -8 7.88576 0.64118   1
   3   1  -9 7.11391 0.42545   2
  -3  -1   9 6.57279 0.72897   1
  -3  -1  -9 5.13119 0.42077   1
   3  -1   9 6.03933 0.44685   2
   3   1   9 6.06647 0.44814   2
  -3   1   9 5.46104 0.44027   2
  -3  -1   9 5.93698 0.76809   3
   3  -1  -9 6.18342 0.69211   3
   3   1  -9 5.63621 0.60326   1
   3  -1  -9 6.11718 0.42670   2
  -3  -1   9 6.33556 0.44962   2
  -3  -1  -9 6.17064 0.43261   2
   3  -1  -9 5.76243 0.66986   1
  -3   1  -9 6.04973 0.41000   2
   3   1   9 6.26427 0.77844   3
   3  -1 -10 8.67136 0.79776   3
  -3   1  10 9.70004 0.61323   2
   3  -1  10 8.84362 0.59990   2
   3   1 -10 9.60127 0.77568   1
  -3  -1 -10 10.3738 0.58265   1
   3  -1 -10 10.1446 0.59611   2
   3  -1 -10 8.86229 0.77671   1
   3   1  10 10.5199 0.60852   2
  -3  -1  10 9.57118 0.83756   1
   3   1  10 9.60783 0.89812   3
  -3   1 -10 9.05423 0.58962   2
  -3  -1  10 9.15666 0.84518   3
   3   1 -10 9.40883 0.58629   2
  -3  -1  10 8.74656 0.59767   2
  -3  -1 -10 10.1684 0.58788   2
  -3   1 -11 9.19678 0.56404   2
   3  -1  11 8.22163 0.90804   3
   3   1  11 8.53096 0.58734   2
   3  -1 -11 8.41945 0.56332   2
   3   1  11 9.45595 0.86192   3
  -3   1  11 8.57173 0.58927   2
  -3  -1  11 8.65619 0.58359   2
  -3  -1  11 9.85279 0.85061   3
   3  -1  11 8.84192 0.58735   2
  -3  -1 -11 10.0939 0.58379   2
   3  -1 -11 8.64365 0.79620   1
   3   1 -11 10.2684 0.74286   1
   3   1 -11 9.82468 0.57686   2
  -3  -1  11 8.86597 0.85308   1
  -3  -1 -11 8.63723 0.55188   1
   3  -1  12 6.16343 0.49682   2
   3   1 -12 7.49228 0.49264   2
  -3   1 -12 5.72353 0.48114   2
   3   1  12 7.31538 0.50095   2
  -3   1  12 6.39643 0.49369   2
   3   1  12 7.21612 0.79344   3
   3  -1  12 5.29397 0.82432   3
  -3  -1  12 6.31810 0.74747   3
   3  -1 -12 8.45479 0.76268   1
  -3  -1 -12 5.78563 0.42502   1
  -3  -1  12 6.23564 0.50309   2
   3  -1 -12 7.45251 0.48517   2
  -3  -1 -12 7.30404 0.50284   2
   3   1 -12 6.13475 0.68544   1
  -3  -1  13 14.9740 1.07368   3
   3  -1 -13 17.5268 1.12429   1
  -3  -1  13 16.9986 0.94630   2
   3  -1 -13 16.8385 0.94955   2
   3  -1  13 16.7578 0.95278   2
   3   1  13 17.1136 0.95498   2
   3   1 -13 18.0294 0.94085   2
   3   1 -13 17.4508 1.05873   1
  -3  -1 -13 15.1394 0.89065   1
   3  -1  13 11.9798 1.06332   3
  -3   1 -13 17.4494 0.94579   2
   3   1  13 17.6878 1.11009   3
  -3   1  13 16.2749 0.95295   2
  -3  -1 -13 18.2155 0.95051   2
   3   1  14 0.58620 0.64912   3
  -3   1 -14 1.25730 0.35243   2
   3  -1  14 1.11358 0.36640   2
   3  -1  14 1.51581 0.65258   3
   3   1 -14 1.29181 0.59324   1
  -3  -1 -14 1.38486 0.35842   2
  -3  -1  14 1.00239 0.36418   2
   3  -1 -14 1.28503 0.37778   2
   3   1  14 1.31981 0.38525   2
  -3   1  14 1.53224 0.37739   2
  -3  -1  14 0.02263 0.52262   3
   3   1 -14 1.47025 0.38556   2
   3  -1 -14 0.05346 0.62936   1
  -3   1 -15 16.2855 0.93163   2
   3  -1  15 15.6116 1.12424   3
   3  -1 -15 16.9567 0.94364   2
  -3  -1  15 16.2514 0.94114   2
   3  -1 -15 16.9129 1.08005   1
   3   1 -15 15.7059 1.05370   1
  -3  -1  15 14.0822 1.00117   3
   3   1  15 15.6980 0.93165   2
  -3   1  15 15.0939 0.93691   2
   3  -1  15 15.9090 0.93985   2
   3   1 -15 16.1973 0.93819   2
  -3  -1 -15 18.2044 0.94595   2
   3   1 -16 0.70622 0.56014   1
   3  -1 -16 0.20468 0.59680   1
   3  -1 -16 0.40746 0.39019   2
  -3  -1  16 0.96856 0.40091   2
  -3   1 -16 0.65097 0.37901   2
   3   1 -16 0.98567 0.41155   2
   3   1  16 0.39839 0.39061   2
   3  -1  16 0.25996 0.38838   2
   3  -1  16-0.35038 0.70144   3
  -3   1  16 0.36089 0.38849   2
  -3  -1 -16 0.01788 0.39415   2
  -3  -1  17 3.89611 0.45766   2
   3   1  17 2.84912 0.44333   2
   3   1 -17 3.82041 0.65866   1
  -3  -1 -17 3.68047 0.45450   2
   3  -1 -17 2.36213 0.67161   1
   3  -1  17 4.54672 0.74449   3
   3   1 -17 4.18849 0.46180   2
  -3   1 -17 4.08496 0.48019   2
   3  -1 -17 3.99868 0.44518   2
  -3   1  17 3.60798 0.45503   2
   3  -1  17 3.59816 0.43975   2
  -3  -1  18 3.25060 0.44488   2
   3  -1 -18 3.04969 0.45941   2
   3   1  18 2.93825 0.44026   2
  -3   1  18 3.15791 0.46631   2
   3  -1  18 2.53234 0.42259   2
   3  -1 -18 2.43426 0.68590   1
   3   1 -18 2.75152 0.45609   2
  -3   1 -18 2.73136 0.46814   2
   3  -1  18 2.42650 0.68591   3
  -3  -1 -18 2.90102 0.44806   2
   3   1 -18 2.32705 0.66448   1
  -3  -1 -19 19.7912 1.10355   2
  -3   1 -19 17.8771 1.10733   2
   3   1 -19 16.9260 1.20139   1
   3   1 -19 19.1285 1.09918   2
   3  -1  19 17.4898 1.19913   3
   3  -1 -19 20.9340 1.10162   2
   3  -1 -19 16.2690 1.22255   1
  -3   1 -20 1.08923 0.51099   2
   3   1 -20 1.24040 0.48648   2
   3  -1 -20 1.63507 0.47331   2
   3  -1  20 0.99009 0.66283   3
   3  -1 -20 2.32216 0.74198   1
  -3  -1 -20 1.73253 0.47817   2
   3   1 -20 0.11792 0.68379   1
  -3   1 -21 8.71408 0.70004   2
   3  -1 -21 6.57284 0.61700   2
  -3  -1 -21 7.68258 0.64245   2
   3  -1 -21 5.50314 0.86668   1
   3   1 -21 8.58504 0.69630   2
   3   1 -21 5.49734 0.80967   1
   3  -1  21 6.03218 0.75523   3
   3  -1 -22 0.96715 0.82193   1
   3  -1 -22 1.41176 0.51840   2
   3   1 -22 1.03992 0.61056   2
  -3   1 -22-0.05806 0.65397   2
   3   1 -22 0.59939 0.71953   1
  -3  -1 -22 0.77304 0.49882   2
   3   1 -23 0.91232 0.75116   1
   3   1 -23 2.94266 0.64502   2
  -3   1 -23 1.57298 0.62498   2
   3  -1 -23 1.24476 0.82469   1
  -3  -1 -23 1.77551 0.54884   2
   3  -1 -23 1.65713 0.57496   2
   3  -1 -24 2.62962 0.61481   2
  -3  -1 -24 2.87025 0.59733   2
   3  -1 -24 2.75775 0.88837   1
  -3   1 -24 1.93209 0.64200   2
   3   1 -24 3.59687 0.67276   2
   3   1 -24 3.41123 0.91250   1
  -3  -1 -25 1.64360 0.58071   2
  -3   1 -25 0.65572 0.61742   2
   3   1 -25 1.20550 0.62171   2
   3  -1 -25 1.06673 0.57740   2
  -3   1 -26-0.61213 0.63194   2
  -3  -1 -26 0.08169 0.64668   2
   3   1 -26 0.02940 0.60916   2
   3  -1 -26 0.16721 0.63452   2
  -3  -1 -27 1.06790 0.67819   2
   3  -1 -27 0.26066 0.66356   2
   3   1 -27 0.66420 0.66697   2
  -3   1 -27 0.03139 0.66278   2
   3  -1 -28-0.03375 0.69120   2
  -3  -1 -28-1.07095 0.69207   2
   3   1 -28-0.48124 0.70349   2
  -3   1 -28 1.21499 0.69138   2
   3  -1 -29-0.44627 0.81388   2
   3   1 -29-0.34311 0.71231   2
  -3  -1 -29-0.53516 0.80852   2
  -3   1 -29 0.41917 0.67851   2
   3   1 -30-1.32176 0.71520   2
  -3   1 -30 1.37726 0.76242   2
  -3  -1 -30-0.63335 0.86922   2
   3  -1 -30-0.35134 0.90407   2
  -3  -1 -31-0.75906 0.79435   2
  -3   1 -31 0.29810 0.77016   2
   3   1 -31 1.09221 0.75667   2
   3  -1 -31 1.36592 0.79525   2
  -3  -1 -32-0.16000 0.80925   2
   3   1 -32 0.67859 0.79216   2
  -3   1 -32 0.38756 0.81478   2
   3  -1 -32-0.40362 0.79285   2
   3   1 -33 0.10796 0.86270   2
  -3   1 -33-0.04147 0.87155   2
   3  -1 -33-0.22817 0.84860   2
  -3  -1 -33-1.18220 0.85380   2
  -3  -2   0 7.18144 0.58992   1
   3  -2   0 6.21042 0.47197   2
  -3  -2   0 8.17599 0.98460   3
  -3  -2   1 17.8304 1.08137   1
   3  -2  -1 18.4534 0.94880   2
   3   2  -1 14.7223 1.01620   1
  -3   2   1 17.7291 1.01348   2
  -3  -2  -1 18.4915 1.36677   3
  -3  -2   1 15.6833 1.30584   3
  -3  -2  -1 15.8581 1.06021   1
   3   2   1 19.6639 1.00801   2
   3  -2  -2 2.46989 0.23352   2
  -3  -2  -2 1.07973 0.23253   2
  -3  -2  -2 1.87080 0.56440   1
   3   2  -2 1.32499 0.52768   1
  -3  -2   2 0.83273 0.54940   1
  -3   2   2 1.14136 0.30405   2
  -3  -2  -2 1.06114 0.90366   3
   3   2   2 1.63787 0.29192   2
  -3  -2  -3 13.4549 1.21994   3
  -3  -2  -3 12.8513 0.89877   1
  -3  -2   3 11.3650 0.98828   1
   3   2   3 15.8107 0.81670   2
   3  -2  -3 15.3855 0.79490   2
  -3   2   3 15.1379 0.81588   2
   3   2  -3 12.8258 0.88924   1
  -3  -2  -3 14.2335 0.79391   2
  -3  -2   4 3.18727 0.80020   3
   3  -2  -4 3.46146 0.28198   2
   3  -2   4 3.58080 0.27748   2
  -3   2   4 2.72879 0.34069   2
   3   2   4 3.05366 0.32617   2
  -3  -2  -4 1.48108 0.90736   3
  -3  -2  -4 3.02144 0.28158   2
   3   2  -4 3.49337 0.46428   1
  -3  -2  -4 2.25958 0.38182   1
  -3  -2   4 3.58342 0.28218   2
  -3  -2  -5 0.55838 0.22866   2
   3  -2   5 0.08064 0.35780   1
   3   2   5 0.40331 0.31434   2
  -3  -2  -5 0.64672 0.84766   3
   3  -2  -5 0.59701 0.22225   2
  -3  -2   5 0.29988 0.80111   3
  -3  -2   5 0.21457 0.23261   2
  -3   2   5 0.38781 0.30525   2
  -3  -2  -5-0.15316 0.40095   1
   3  -2   5 0.48192 0.25066   2
   3   2  -5-0.23341 0.45506   1
  -3  -2   6 14.5339 0.75637   2
  -3  -2  -6 13.6913 0.74948   2
  -3  -2   6 11.9532 0.94422   1
   3  -2   6 14.2583 0.75081   2
   3   2   6 12.9190 0.77167   2
  -3  -2  -6 12.8235 0.81049   1
  -3  -2  -6 13.8642 1.16115   3
   3  -2  -6 12.8573 0.75340   2
  -3  -2   6 15.9081 1.08106   3
   3  -2   6 14.0165 0.77812   1
  -3   2   6 12.4593 0.77484   2
   3   2  -6 12.6672 0.86316   1
   3   2   7 7.63605 0.48645   2
   3   2  -7 7.12074 0.44510   2
  -3  -2  -7 5.48545 0.94769   3
   3  -2  -7 7.35708 0.45688   2
  -3   2   7 6.85510 0.48423   2
  -3  -2  -7 8.31041 0.44822   2
  -3  -2   7 6.55285 0.69962   1
  -3   2  -7 6.49853 0.43755   2
  -3  -2  -7 7.92220 0.51168   1
   3  -2   7 5.31334 0.47363   1
   3  -2   7 6.65251 0.45124   2
  -3  -2   7 5.48422 0.45137   2
  -3  -2   7 6.05561 0.82328   3
   3   2  -7 5.42438 0.58459   1
   3  -2  -8 17.3326 0.92377   2
   3  -2   8 17.8343 0.92361   2
   3  -2   8 16.2445 0.91265   1
   3   2  -8 14.3368 1.00078   1
  -3  -2  -8 16.8543 0.91678   2
  -3   2   8 16.6566 0.93844   2
   3  -2  -8 14.4270 1.09010   3
  -3  -2   8 17.0598 1.07144   1
   3   2  -8 16.5614 0.91544   2
  -3  -2   8 16.4139 0.92226   2
   3   2   8 16.5050 0.93647   2
  -3  -2   8 17.3448 1.14174   3
   3  -2  -8 15.5828 1.10086   1
  -3   2  -8 16.7300 0.91600   2
  -3  -2  -8 17.3456 1.21321   3
   3   2  -9 0.37889 0.26393   2
   3  -2  -9 1.07055 0.61953   1
  -3  -2   9 0.55626 0.28934   2
   3  -2   9 0.17223 0.28619   2
   3  -2  -9 0.44562 0.62882   3
  -3  -2  -9 0.13940 0.26415   2
  -3   2   9 0.41252 0.33182   2
  -3  -2   9 0.15196 0.69604   3
  -3   2  -9 0.76028 0.26466   2
  -3  -2  -9-0.46362 0.76368   3
   3   2   9 0.37131 0.33320   2
  -3  -2   9 0.57676 0.67390   1
   3   2  -9 1.25679 0.46598   1
   3  -2  -9 0.30439 0.26621   2
   3  -2 -10 1.00608 0.30126   2
  -3  -2  10 1.32496 0.32409   2
  -3  -2 -10 0.80167 0.77372   3
   3   2 -10 1.68393 0.29852   2
   3  -2 -10-0.02329 0.61137   1
   3  -2  10 1.36037 0.31584   2
  -3   2 -10 1.15168 0.30367   2
  -3  -2  10 1.18880 0.66448   1
   3   2  10 1.09403 0.34842   2
  -3   2  10 1.33242 0.36228   2
   3  -2 -10 2.05739 0.65455   3
   3   2 -10 1.61814 0.50666   1
  -3  -2  10 1.71066 0.68557   3
  -3  -2 -10 1.36253 0.30452   2
   3   2 -11 51.2413 2.78165   1
   3   2  11 50.9036 2.73790   2
  -3  -2  11 52.9977 2.81104   3
  -3  -2  11 52.5047 2.82127   1
  -3  -2  11 49.7147 2.73521   2
  -3   2 -11 50.9027 2.73363   2
   3  -2 -11 49.6155 2.80515   1
  -3   2  11 50.2779 2.74027   2
  -3  -2 -11 54.3695 2.73689   2
   3  -2 -11 56.0320 2.73959   2
   3   2 -11 52.7191 2.73439   2
   3  -2  11 53.1256 2.73576   2
   3   2 -12 28.3584 1.50455   2
   3  -2 -12 27.9682 1.64839   1
  -3  -2  12 27.1135 1.50843   2
  -3   2  12 26.3532 1.51497   2
   3   2 -12 27.4227 1.58048   1
  -3  -2  12 27.3925 1.63253   3
  -3   2 -12 27.9299 1.50629   2
   3   2  12 26.0135 1.51046   2
  -3  -2 -12 29.2962 1.51476   2
   3  -2 -12 29.7671 1.51747   2
  -3  -2  12 27.5662 1.63027   1
   3  -2  12 30.0071 1.51511   2
  -3   2  13 47.6414 2.72924   2
   3   2  13 49.0654 2.72853   2
   3  -2 -13 55.3438 2.73631   2
  -3   2 -13 54.1399 2.72898   2
   3  -2  13 51.9024 2.72731   2
  -3  -2  13 53.1449 2.81152   1
   3   2 -13 54.4420 2.72737   2
   3   2 -13 51.4111 2.77409   1
   3  -2 -13 50.3754 2.80556   1
  -3  -2  13 51.8314 2.79048   3
  -3  -2 -13 52.5241 2.73196   2
  -3  -2  13 50.0636 2.72495   2
   3  -2 -14 4.88040 0.75538   1
  -3   2  14 6.69806 0.51910   2
   3   2 -14 6.86348 0.50466   2
  -3   2 -14 5.92260 0.50665   2
   3   2 -14 7.12550 0.68023   1
  -3  -2  14 6.57346 0.50555   2
  -3  -2  14 5.14328 0.78696   1
   3  -2 -14 6.42724 0.50441   2
  -3  -2 -14 7.44809 0.53221   2
   3  -2  14 6.03222 0.51739   2
  -3  -2  14 6.17400 0.68299   3
   3   2  14 6.50154 0.52304   2
  -3  -2  15 10.1086 0.66611   2
  -3   2  15 10.2131 0.68421   2
   3  -2 -15 11.2012 0.67497   2
   3   2  15 9.40972 0.67369   2
  -3  -2  15 10.8001 0.82314   3
   3   2 -15 11.0569 0.67222   2
  -3  -2 -15 10.8420 0.66773   2
  -3   2 -15 9.53190 0.66472   2
   3  -2 -15 10.5426 0.85354   1
   3  -2  15 10.1276 0.66302   2
   3   2 -15 9.54695 0.77519   1
  -3   2 -16 4.60874 0.48899   2
   3  -2 -16 5.02506 0.73278   1
  -3   2  16 5.53254 0.51364   2
   3  -2 -16 7.26725 0.51563   2
   3  -2  16 5.28541 0.80157   3
   3   2 -16 6.24037 0.51679   2
   3   2  16 5.42912 0.49930   2
   3  -2  16 5.73781 0.49731   2
   3   2 -16 4.83934 0.65197   1
  -3  -2  16 6.30024 0.50200   2
  -3  -2  16 4.69590 0.67486   3
  -3  -2 -16 6.27959 0.50486   2
   3  -2 -17 12.3256 0.71852   2
   3   2  17 9.97792 0.70436   2
   3  -2  17 6.83240 0.86954   3
   3   2 -17 10.8611 0.70399   2
  -3   2  17 10.5649 0.70699   2
   3   2 -17 11.0074 0.83117   1
  -3  -2 -17 10.6394 0.68707   2
   3  -2 -17 10.7403 0.90165   1
   3  -2  17 10.9242 0.68963   2
  -3  -2  17 10.2053 0.68772   2
  -3  -2  17 8.53503 0.81097   3
  -3   2 -17 11.1418 0.71030   2
  -3  -2 -18 1.66831 0.42559   2
   3  -2 -18 2.18534 0.87062   1
  -3  -2  18 1.11850 0.51266   3
  -3   2  18 2.00703 0.43502   2
   3  -2 -18 2.09636 0.43076   2
   3   2 -18 2.18919 0.62453   1
   3  -2  18 1.44702 0.39554   2
   3   2 -18 1.91913 0.45756   2
   3  -2  18 0.91814 0.65475   3
  -3   2 -18 1.96265 0.45302   2
   3   2  18 1.65453 0.44320   2
  -3  -2  18 1.28823 0.40464   2
   3  -2 -19 20.3327 1.07045   2
  -3   2 -19 17.4124 1.06734   2
   3  -2 -19 18.6299 1.23830   1
   3   2 -19 17.6285 1.06286   2
  -3  -2 -19 20.1344 1.08570   2
   3  -2  19 12.8785 1.18684   3
   3   2 -19 17.3211 1.18062   1
   3  -2  20 0.05472 0.72574   3
   3  -2 -20-0.51846 0.50142   2
   3  -2 -20-0.42171 0.73661   1
  -3  -2 -20-1.05443 0.50006   2
   3   2 -20 0.28536 0.47902   2
  -3   2 -20-0.66102 0.47478   2
   3   2 -20-1.26873 0.76345   1
  -3   2 -21 12.9763 0.89449   2
   3   2 -21 14.4166 0.89784   2
  -3  -2 -21 14.5140 0.89371   2
   3  -2 -21 11.8431 1.08492   1
   3  -2 -21 14.6330 0.92058   2
   3  -2  21 10.6993 1.04329   3
   3   2 -21 12.8253 1.06305   1
  -3  -2 -22 1.41303 0.54246   2
   3   2 -22 1.14335 0.50934   2
  -3   2 -22 0.13000 0.52418   2
   3  -2 -22 0.66143 0.52623   2
   3  -2 -22 0.49570 0.81047   1
   3   2 -22 0.68594 0.71333   1
   3  -2  22 0.15283 0.72434   3
   3   2 -23 0.88922 0.59074   1
  -3  -2 -23 1.83381 0.55395   2
   3  -2 -23 2.28530 0.57735   2
   3   2 -23 2.27684 0.56986   2
   3  -2  23 1.87854 0.70084   3
  -3   2 -23 2.10954 0.56202   2
   3  -2 -23 1.42088 0.89608   1
   3  -2 -24 4.46590 0.66818   2
   3   2 -24 5.42835 0.66009   2
  -3   2 -24 5.13393 0.64840   2
  -3  -2 -24 4.76443 0.65822   2
   3  -2 -24 2.74738 0.94698   1
   3   2 -25-0.45097 0.60803   2
  -3  -2 -25-0.15660 0.63012   2
  -3   2 -25-0.31090 0.60478   2
   3  -2 -25-0.54463 0.60930   2
   3   2 -26 1.10470 0.63460   2
  -3  -2 -26-0.05111 0.65169   2
  -3   2 -26 0.96232 0.62809   2
   3  -2 -26 1.15760 0.62041   2
   3   2 -27 2.53899 0.67685   2
  -3   2 -27 1.52608 0.68215   2
   3  -2 -27 2.16639 0.65078   2
  -3  -2 -27 0.37505 0.63808   2
  -3   2 -28 2.70722 0.70956   2
  -3  -2 -28 1.61235 0.66105   2
   3  -2 -28 1.31608 0.67478   2
   3   2 -28 1.74525 0.72166   2
  -3  -2 -29 0.41348 0.70472   2
   3  -2 -29 0.75012 0.73793   2
   3   2 -29 0.33070 0.71064   2
  -3   2 -29-0.11671 0.71888   2
   3   2 -30 3.03268 0.77676   2
  -3   2 -30 2.47321 0.78873   2
   3  -2 -30 2.57045 0.77961   2
  -3  -2 -30 2.23525 0.78171   2
   3  -2 -31 1.75557 0.85561   2
   3   2 -31 1.61099 0.81765   2
  -3   2 -31 1.30896 0.79714   2
  -3  -2 -31 0.58141 0.82156   2
   3   2 -32 1.24871 0.80886   2
  -3   2 -32 0.07750 0.81416   2
  -3  -2 -32 0.65658 0.92863   2
   3  -2 -32 1.90871 0.93079   2
   3  -2 -33 1.25583 0.91004   2
  -3  -2 -33 0.29091 0.93804   2
  -3  -3   0 0.99957 0.42792   2
  -3  -3   0 0.58280 0.42309   1
   3  -3   0 1.86554 0.45968   2
   3  -3  -1 73.2470 3.78022   2
  -3  -3   1 63.3484 3.81135   1
   3   3   1 75.8931 3.81480   2
  -3   3   1 73.1175 3.81241   2
  -3  -3  -1 74.4623 3.77842   2
  -3  -3  -1 72.7044 3.80805   1
   3   3  -2 10.9522 0.93668   1
  -3  -3  -2 16.7990 0.89533   2
   3   3   2 17.4814 0.95543   2
  -3  -3  -2 14.1735 0.98985   1
  -3   3   2 16.7252 0.95563   2
  -3  -3   2 13.7321 1.00777   1
   3  -3  -2 18.9398 0.89277   2
  -3   3   3 3.47104 0.39900   2
  -3  -3  -3 3.66839 0.32807   2
   3   3   3 4.23936 0.40675   2
  -3  -3   3 1.38538 0.54772   1
   3   3  -3 2.76345 0.46973   1
   3  -3  -3 4.07155 0.33486   2
  -3  -3  -4 280.761 15.0855   3
   3  -3  -4 309.084 15.0332   2
  -3   3   4 277.589 15.0348   2
  -3  -3  -4 298.644 15.0329   2
   3   3   4 293.068 15.0348   2
   3   3  -4 266.442 15.0464   1
  -3  -3  -5 1.58097 0.90063   3
  -3   3   5 1.95450 0.37649   2
   3   3   5 1.71533 0.36650   2
  -3  -3  -5 2.08776 0.30914   2
   3  -3   5 3.68160 0.30082   2
   3   3  -5 2.36054 0.41094   1
  -3  -3   5 3.89454 0.31884   2
   3  -3  -5 2.41620 0.30190   2
  -3  -3   6 1.66681 0.61212   1
   3   3  -6 1.40132 0.37192   1
   3   3   6 1.39252 0.35867   2
  -3  -3  -6 2.16840 0.91248   3
  -3  -3  -6 1.64577 0.30201   2
  -3  -3   6 1.48718 0.27714   2
  -3   3   6 1.74585 0.36792   2
   3  -3  -6 1.67690 0.28628   2
   3  -3   6 1.71352 0.28496   2
   3   3   7 1.97923 0.37086   2
  -3  -3  -7 1.88382 0.86484   3
   3   3  -7 1.69692 0.42225   1
  -3   3   7 2.07187 0.38763   2
  -3  -3  -7 2.48424 0.32059   2
  -3  -3   7 2.93997 0.35620   2
   3  -3   7 2.37684 0.34832   2
  -3  -3   7 1.24615 0.62630   1
   3  -3  -7 2.31414 0.33508   2
  -3  -3  -8 6.93769 0.94324   3
  -3  -3  -8 6.25413 0.47113   2
   3  -3   8 6.45436 0.46081   2
   3  -3  -8 6.91447 0.45589   2
  -3   3   8 6.75706 0.51376   2
  -3  -3   8 7.34814 0.73704   1
   3   3   8 7.00237 0.52431   2
   3   3  -8 6.88095 0.59447   1
  -3  -3   8 6.55768 0.46556   2
  -3   3   9-0.26607 0.36428   2
   3  -3  -9-0.14526 0.29128   2
   3   3  -9 0.17914 0.51925   1
   3  -3   9-0.10771 0.31248   2
  -3  -3   9-0.60797 0.60453   1
  -3  -3  -9-0.15264 0.30001   2
  -3  -3   9 0.14621 0.30030   2
   3   3   9-0.10139 0.36300   2
  -3  -3  -9 0.62585 0.87620   3
  -3  -3 -10 98.0456 4.85846   2
   3  -3 -10 99.4321 4.85643   2
  -3   3  10 90.6324 4.86127   2
  -3  -3 -10 93.8260 4.96299   3
  -3  -3  10 97.0229 4.90230   1
   3   3  10 92.7859 4.85998   2
   3  -3  10 91.9476 4.85078   2
   3   3 -10 90.3155 4.89118   1
  -3  -3  10 87.7983 4.85235   2
   3  -3  11 14.2825 0.82186   2
  -3  -3  11 13.8523 0.81796   2
  -3  -3 -11 12.8644 1.14425   3
  -3   3  11 12.4169 0.83849   2
  -3  -3 -11 13.9909 0.82405   2
   3   3 -11 14.7882 0.94042   1
   3  -3 -11 13.5364 0.99806   3
  -3  -3  11 14.5518 0.99656   1
   3  -3 -11 14.9251 0.81923   2
   3   3  11 13.6688 0.84600   2
  -3  -3 -12 10.6851 1.02051   3
   3  -3 -12 13.2652 0.71063   2
   3  -3  12 10.8512 0.69941   2
   3   3  12 12.7618 0.73071   2
  -3   3  12 10.9763 0.73164   2
  -3  -3  12 10.4230 0.69700   2
  -3  -3 -12 11.4883 0.69436   2
  -3   3 -12 9.94457 0.68894   2
   3   3 -12 11.0743 0.82922   1
   3   3 -12 11.5177 0.69594   2
  -3  -3  12 11.5865 0.95274   1
   3  -3 -13 15.8840 1.15799   1
  -3   3 -13 17.1453 0.96266   2
   3   3 -13 17.9659 0.96822   2
  -3   3  13 16.4191 0.99249   2
  -3  -3  13 15.8903 1.12660   1
   3  -3 -13 17.9291 0.96431   2
  -3  -3 -13 13.2140 1.18478   3
  -3  -3  13 15.8571 0.95850   2
  -3  -3 -13 16.9705 0.96812   2
   3  -3  13 16.3495 0.95664   2
   3   3 -13 16.3933 1.06695   1
   3   3  13 17.6798 0.99348   2
   3  -3 -14 4.48446 0.71362   1
   3  -3  14 5.10493 0.45727   2
   3  -3 -14 4.93111 0.47246   2
  -3   3 -14 5.01938 0.48052   2
  -3   3  14 4.21885 0.51224   2
   3   3 -14 5.30641 0.62108   1
  -3  -3 -14 4.51421 0.45448   2
  -3  -3  14 4.36069 0.74439   1
   3   3  14 5.16878 0.50317   2
   3   3 -14 5.67253 0.47354   2
  -3  -3  14 5.14305 0.45109   2
  -3  -3  15 38.1025 2.11260   2
   3  -3  15 38.1898 2.11362   2
  -3  -3  15 37.1789 2.18885   3
  -3   3 -15 39.5964 2.11893   2
  -3  -3  15 37.9843 2.21148   1
   3   3 -15 43.2907 2.12356   2
   3   3 -15 38.6220 2.16531   1
  -3   3  15 40.9515 2.13236   2
   3   3  15 42.0910 2.12958   2
   3  -3 -15 37.0816 2.21086   1
  -3  -3 -15 41.9436 2.12194   2
   3  -3 -15 35.6254 2.11959   3
   3  -3 -15 42.1365 2.12140   2
   3   3  16 1.84044 0.43380   2
   3  -3 -16 1.38812 0.69645   1
  -3  -3 -16 2.74200 0.41085   2
  -3   3 -16 1.87764 0.41009   2
   3   3 -16 1.98983 0.52287   1
   3   3 -16 2.46775 0.41630   2
  -3   3  16 1.44021 0.44407   2
  -3  -3  16 2.53315 0.40983   2
  -3  -3  16 2.76020 0.68810   1
   3  -3 -16 2.06860 0.42778   2
  -3  -3  16 2.45834 0.59852   3
   3  -3  16 2.69315 0.41573   2
  -3  -3  17 5.45848 0.68353   3
   3  -3  17 5.01686 0.49383   2
   3   3  17 4.67751 0.52026   2
  -3  -3  17 5.52619 0.77934   1
   3  -3 -17 5.71270 0.51975   2
  -3  -3  17 5.57036 0.49186   2
  -3  -3 -17 5.45924 0.51529   2
   3  -3 -17 5.06387 0.81694   1
  -3   3  17 5.19129 0.52460   2
   3   3 -17 4.77542 0.58408   1
  -3   3 -17 4.98108 0.52221   2
   3   3 -17 6.04859 0.53356   2
  -3  -3  18 2.52298 0.44057   2
   3  -3 -18 3.84868 0.48799   2
  -3  -3 -18 3.63852 0.48870   2
   3   3  18 3.43717 0.48557   2
   3  -3 -18 2.30572 0.75548   1
  -3   3 -18 2.77016 0.47959   2
  -3   3  18 3.01992 0.46123   2
   3   3 -18 2.13897 0.46842   1
   3   3 -18 3.26291 0.47884   2
   3  -3  18 2.78070 0.44555   2
  -3  -3  18 2.40250 0.62506   3
   3   3 -19-0.34605 0.46697   2
   3  -3 -19-1.35761 0.77531   1
  -3  -3  19 0.69083 0.59246   3
  -3  -3 -19 0.31119 0.42896   2
  -3   3 -19-0.05661 0.44563   2
   3  -3 -19 0.37447 0.43644   2
   3   3 -19-0.21803 0.54646   1
  -3  -3  20 0.07573 0.59790   3
   3  -3 -20 1.61759 0.47997   2
  -3  -3 -20 2.00555 0.49081   2
   3  -3  20 0.45147 0.72513   3
   3   3 -20 1.80849 0.65998   1
   3   3 -20 2.54615 0.51493   2
  -3   3 -20 2.05512 0.48965   2
   3  -3 -20 2.38749 0.81079   1
   3   3 -21 2.63233 0.72197   1
   3  -3 -21 3.17563 0.93200   1
  -3  -3 -21 2.48650 0.51313   2
   3   3 -21 2.46732 0.54549   2
   3  -3  21 2.50351 0.70811   3
   3  -3 -21 3.06647 0.52620   2
  -3   3 -21 3.64254 0.55107   2
  -3  -3  21 1.42245 0.56486   3
  -3  -3 -22 0.14668 0.54127   2
   3  -3 -22-0.01684 0.52491   2
   3  -3 -22 1.94628 0.87747   1
   3  -3  22 0.01636 0.76911   3
   3   3 -22 0.68399 0.53910   2
  -3   3 -22 0.27489 0.52989   2
   3   3 -22 1.73418 0.76038   1
   3   3 -23 0.68965 0.76306   1
  -3  -3 -23 1.00917 0.59943   2
   3  -3 -23-0.22428 0.88805   1
   3   3 -23 0.00858 0.56867   2
  -3   3 -23-0.45648 0.61053   2
   3  -3 -23-0.05473 0.56051   2
   3  -3  23-0.23348 0.80997   3
  -3  -3 -24 1.48778 0.62014   2
   3   3 -24 1.36528 0.58418   2
   3  -3 -24 0.54698 0.90082   1
  -3   3 -24 0.68017 0.59183   2
   3  -3 -24-0.16722 0.58084   2
  -3  -3 -25 2.46488 0.60888   2
   3  -3 -25 1.41485 0.62768   2
   3   3 -25 2.34905 0.65868   2
  -3   3 -25 1.70127 0.61965   2
   3  -3 -26-0.38816 0.63579   2
   3   3 -26 0.99549 0.67542   2
  -3  -3 -26 0.74387 0.60996   2
  -3   3 -26-0.26217 0.63694   2
   3   3 -27 2.25827 0.67055   2
   3  -3 -27 1.92287 0.66726   2
  -3  -3 -27 1.25859 0.65244   2
  -3   3 -27 1.38426 0.65680   2
  -3  -3 -28 0.33486 0.68981   2
   3  -3 -28 0.05637 0.69154   2
   3  -3 -29 1.44628 0.70745   2
  -3  -3 -29 2.01784 0.70755   2
   3  -3 -30 1.10872 0.71748   2
  -3  -3 -30-0.30184 0.71900   2
   3  -3 -31 0.63889 0.75788   2
  -3  -3 -31 1.51306 0.76558   2
  -3  -3 -32 2.84767 0.82030   2
   3  -3 -32 1.09442 0.80941   2
   3  -3 -33 1.87865 0.88853   2
  -3  -3 -33 0.76622 0.83912   2
  -3  -4   0 35.0467 1.94187   2
   3  -4   0 36.3633 1.94031   2
  -3  -4  -1 64.4996 3.49959   2
   3  -4  -1 70.5139 3.50063   2
  -3  -4   1 65.7309 3.53624   1
   3   4   1 68.0180 3.56002   2
  -3   4   1 64.5004 3.56050   2
  -3  -4  -2 27.9101 1.62569   2
   3   4   2 30.9498 1.69816   2
  -3   4   2 29.7560 1.69709   2
  -3  -4   2 33.7907 1.69861   1
   3  -4  -2 31.7734 1.62749   2
  -3  -4  -3 159.167 8.22135   2
   3   4   3 162.859 8.23283   2
   3  -4  -3 163.475 8.22027   2
  -3   4   3 146.825 8.23101   2
   3   4   4 1.82377 0.44596   2
  -3  -4  -4 1.99795 0.33088   2
   3  -4  -4 2.05636 0.35772   2
  -3   4   4 2.86519 0.44989   2
  -3   4   5 0.35648 0.41892   2
   3   4   5 0.01422 0.41485   2
   3  -4  -5 0.45387 0.32616   2
  -3  -4  -5 0.18436 0.30506   2
  -3  -4  -6 1.21328 0.30593   2
  -3   4   6 1.75507 0.42450   2
   3  -4  -6 1.60502 0.31161   2
  -3  -4   6 1.77071 0.60808   1
   3   4   6 1.17908 0.40781   2
   3  -4   7 12.1745 0.71071   2
   3   4   7 11.1453 0.75910   2
  -3  -4   7 12.2396 0.90963   1
  -3  -4  -7 12.6290 0.70475   2
   3  -4  -7 12.4568 0.71242   2
   3   4  -7 11.2231 0.77347   1
  -3   4   7 11.4144 0.74537   2
  -3  -4   7 11.8549 0.70822   2
   3  -4   8 21.6754 1.17422   2
  -3  -4   8 21.2401 1.29386   1
   3  -4  -8 23.4472 1.17614   2
   3   4   8 21.9479 1.20746   2
  -3  -4   8 20.5938 1.16921   2
  -3  -4  -8 22.6813 1.18063   2
   3   4  -8 18.5286 1.21535   1
  -3  -4  -8 21.6088 1.44440   3
  -3   4   8 20.8239 1.21283   2
  -3  -4   9 2.12038 0.67400   1
   3  -4  -9 3.27841 0.37876   2
  -3  -4   9 1.53671 0.39468   2
   3   4   9 1.85135 0.39478   2
  -3  -4  -9 1.42163 0.85190   3
   3  -4   9 1.99021 0.39051   2
  -3   4   9 2.07014 0.40297   2
   3   4  -9 1.63889 0.51124   1
  -3  -4  -9 2.82481 0.36392   2
   3   4 -10 1.13077 0.51713   1
   3  -4  10 0.01031 0.35294   2
  -3  -4  10 0.56934 0.34604   2
  -3  -4 -10 0.54972 0.86984   3
   3   4  10 0.38519 0.40912   2
  -3  -4  10 0.44725 0.63632   1
   3  -4 -10 0.73037 0.33494   2
  -3  -4 -10 0.58566 0.35860   2
  -3   4  10 0.37815 0.41965   2
   3   4 -11 4.25279 0.58666   1
  -3  -4 -11 4.51679 0.95215   3
   3  -4  11 4.80733 0.44263   2
  -3  -4 -11 5.00644 0.42920   2
  -3  -4  11 4.49858 0.68863   1
   3   4  11 5.34886 0.51088   2
  -3   4  11 4.49765 0.49754   2
  -3  -4  11 4.23062 0.43027   2
   3  -4 -11 4.41913 0.44836   2
  -3  -4  12 35.1952 1.96689   1
   3  -4 -12 37.4778 1.86894   2
  -3   4  12 31.8637 1.87654   2
   3  -4  12 36.3112 1.85811   2
  -3  -4 -12 36.0115 2.04838   3
   3   4 -12 34.0464 1.92676   1
  -3  -4  12 33.8561 1.86135   2
  -3  -4 -12 35.8828 1.86972   2
   3   4  12 32.9918 1.87850   2
   3  -4  13 17.7286 0.96461   2
   3  -4 -13 18.2682 0.96977   2
   3   4 -13 15.1405 1.05236   1
  -3  -4 -13 16.3638 1.27074   3
  -3   4  13 15.5052 0.98739   2
   3   4  13 14.8962 0.97919   2
  -3  -4  13 18.4434 1.11950   1
  -3  -4 -13 16.9224 0.97370   2
  -3  -4  13 16.9356 0.96159   2
  -3  -4 -14-0.36490 0.38226   2
  -3   4  14-0.60918 0.43508   2
   3   4 -14 0.23730 0.53697   1
   3  -4 -14 0.22794 0.38162   2
  -3  -4  14 0.25424 0.64973   1
   3  -4  14 0.02293 0.36733   2
   3   4  14-0.28566 0.40360   2
  -3  -4 -14-0.02677 0.82101   3
  -3  -4  14-0.15399 0.34244   2
   3   4 -15 1.00020 0.56585   1
  -3  -4  15 0.56947 0.36760   2
  -3  -4 -15-0.61523 0.61435   3
  -3   4  15 0.61129 0.41193   2
  -3  -4 -15 0.20279 0.40303   2
   3  -4  15 0.21954 0.37672   2
   3   4  15 0.49200 0.42729   2
   3  -4 -15 0.30828 0.38469   2
  -3  -4  15 0.27381 0.70529   1
   3  -4 -16 30.1203 1.47484   2
  -3   4  16 24.3390 1.47554   2
  -3  -4 -16 29.5081 1.47103   2
   3   4 -16 26.9504 1.53176   1
   3   4  16 25.4729 1.47908   2
  -3  -4  16 26.2991 1.45625   2
  -3  -4  16 26.1077 1.58157   1
   3  -4 -16 23.7897 1.48473   3
   3  -4  16 26.6499 1.45662   2
  -3  -4  17 5.92611 0.77271   1
   3   4 -17 4.39614 0.64474   1
   3   4  17 5.44957 0.54625   2
   3  -4 -17 5.58236 0.52721   2
   3  -4  17 5.42459 0.50252   2
  -3  -4  17 5.67297 0.50347   2
  -3   4  17 5.68775 0.55461   2
  -3  -4 -17 5.33325 0.53034   2
   3  -4 -17 6.17347 0.85016   1
  -3   4  18 14.9259 1.01750   2
   3  -4 -18 17.8025 1.23890   1
   3   4  18 17.0047 1.02316   2
  -3  -4  18 16.6247 1.18667   1
   3  -4 -18 18.7385 1.02114   2
  -3  -4  18 16.0638 1.00354   2
   3  -4  18 16.8590 1.00634   2
   3   4 -18 15.8644 1.09808   1
  -3  -4 -18 18.3618 1.02824   2
  -3  -4  19 2.66152 0.68813   3
   3  -4 -19 3.39890 0.50312   2
  -3  -4  19 2.99408 0.79182   1
  -3  -4 -19 3.58362 0.51800   2
   3  -4 -19 4.44147 0.86579   1
  -3  -4 -20 2.17442 0.52663   2
   3  -4 -20 1.66429 0.88727   1
   3  -4 -20 2.70352 0.53572   2
  -3  -4  20 1.89121 0.66738   3
   3  -4 -21 3.52204 0.57433   2
  -3  -4 -21 2.87604 0.54097   2
   3  -4 -21 2.24497 0.92014   1
  -3  -4  21 2.29838 0.69363   3
  -3  -4  22-0.24937 0.65162   3
   3  -4 -22 0.28618 0.51995   2
   3  -4 -22 1.65458 0.94476   1
  -3  -4 -22 0.93095 0.52746   2
  -3  -4 -23 1.80531 0.56101   2
  -3  -4  23 2.15303 0.64457   3
   3  -4  23 1.39150 0.69837   3
   3  -4 -23 0.62262 0.98036   1
   3  -4 -23 1.73409 0.57496   2
   3  -4 -24 0.08157 1.09026   1
  -3  -4 -24 0.74310 0.58988   2
   3  -4 -24 0.95193 0.59171   2
  -3  -4 -25 0.64023 0.66322   2
   3  -4 -25 0.60483 0.64072   2
   3  -4 -26 0.92541 0.63550   2
  -3  -4 -26 1.01181 0.65080   2
  -3  -4 -27 1.59765 0.66034   2
   3  -4 -27 0.54862 0.64672   2
  -3  -4 -28 0.59268 0.67830   2
   3  -4 -28-0.60125 0.67019   2
  -3  -4 -29 0.03550 0.73178   2
   3  -4 -29-0.33523 0.72008   2
   3  -4 -30-2.03729 0.79097   2
  -3  -4 -30 0.13818 0.76876   2
   3  -4 -31 3.38342 0.84144   2
  -3  -4 -31 1.63005 0.81682   2
   3  -4 -32 0.09061 0.79148   2
  -3  -4 -32 0.63623 0.79963   2
  -3  -5   0 95.6885 5.10166   2
   3  -5   0 99.2561 5.10329   2
  -3  -5  -1 21.5926 1.24364   2
   3  -5  -1 22.0293 1.25289   2
  -3  -5  -2 5.14332 0.48305   2
   3  -5  -2 4.89813 0.47760   2
   3   5   2 4.07552 0.74842   2
  -3   5   2 4.82075 0.77176   2
  -3  -5  -3 6.22918 0.51887   2
   3  -5  -3 6.86777 0.52155   2
  -3   5   3 7.10278 0.71620   2
   3   5   3 6.79479 0.70487   2
   3  -5  -4 12.8889 0.75790   2
  -3  -5  -4 11.9815 0.75200   2
  -3   5   4 11.9809 0.85593   2
   3   5   4 12.1729 0.83415   2
   3   5   5 17.1461 1.08025   2
  -3   5   5 16.2185 1.08534   2
   3  -5  -5 18.8841 1.04330   2
  -3  -5  -5 19.6621 1.02662   2
   3   5   6 0.57595 0.44412   2
   3  -5  -6 0.85175 0.36379   2
  -3  -5   6 0.81618 0.61675   1
  -3   5   6 1.10914 0.47864   2
  -3  -5  -6 1.09019 0.32435   2
   3   5   7 21.8495 1.23551   2
  -3  -5  -7 22.2698 1.19555   2
  -3   5   7 19.8379 1.22814   2
   3  -5  -7 22.2321 1.19322   2
  -3  -5   7 22.0699 1.34006   1
  -3  -5   8 1.33471 0.34646   2
   3   5   8 1.37657 0.45009   2
   3  -5  -8 1.13652 0.36354   2
   3  -5   8 1.01189 0.33833   2
  -3  -5  -8 1.56335 0.37523   2
  -3  -5   8 1.69734 0.63244   1
  -3   5   8 1.66880 0.45310   2
  -3  -5   9 10.9340 0.70528   2
  -3  -5   9 11.5858 0.90843   1
   3   5   9 11.3150 0.76412   2
   3  -5   9 11.2714 0.71915   2
   3  -5  -9 13.2775 0.73699   2
  -3   5   9 11.4293 0.77284   2
  -3  -5  -9 11.7362 0.71580   2
  -3  -5  10 3.14775 0.69763   1
   3   5  10 3.85557 0.52989   2
  -3  -5 -10 3.79795 0.93927   3
   3  -5 -10 3.88330 0.40304   2
  -3  -5  10 4.17019 0.42783   2
  -3   5  10 2.73316 0.48220   2
  -3  -5 -10 4.20626 0.42560   2
   3  -5  10 3.76705 0.42199   2
   3  -5 -11 55.8902 2.82160   2
  -3  -5  11 52.0448 2.81392   2
  -3  -5  11 52.4570 2.88909   1
  -3  -5 -11 56.1104 2.81971   2
  -3   5  11 49.4565 2.83246   2
   3   5  11 51.7567 2.83227   2
   3  -5  11 55.6924 2.81747   2
  -3  -5 -11 51.8938 2.95060   3
   3  -5  12 69.5650 3.59739   2
  -3  -5 -12 70.3045 3.72431   3
  -3   5  12 62.9347 3.61127   2
  -3  -5  12 68.0887 3.59858   2
   3   5  12 66.1247 3.61190   2
  -3  -5  12 72.2479 3.66550   1
  -3  -5 -12 70.3877 3.60828   2
   3  -5 -12 73.1112 3.61106   2
  -3  -5 -13 5.68384 0.91992   3
   3   5  13 6.33398 0.56125   2
  -3  -5  13 5.89036 0.51523   2
   3  -5  13 6.58280 0.51598   2
  -3  -5 -13 6.66776 0.54222   2
   3  -5 -13 6.53891 0.51020   2
  -3  -5  13 6.94815 0.73151   1
  -3   5  13 6.97977 0.56654   2
  -3  -5  14-0.30187 0.37966   2
   3   5  14-0.29421 0.44456   2
  -3  -5  14-0.44118 0.70274   1
   3  -5  14 0.30173 0.37931   2
  -3   5  14-0.05446 0.43789   2
  -3  -5 -14-1.42203 0.86526   3
   3  -5 -14 0.45474 0.39935   2
  -3  -5 -14 0.03633 0.41014   2
  -3  -5  15 8.90928 0.62926   2
  -3   5  15 7.69281 0.68194   2
  -3  -5  15 9.61074 0.84319   1
  -3  -5 -15 9.45884 0.64639   2
   3   5  15 8.26210 0.67015   2
   3  -5 -15 10.5573 0.66779   2
  -3  -5 -15 9.65135 0.98607   3
   3  -5  15 9.04014 0.63691   2
  -3  -5  16-0.01650 0.39540   2
  -3  -5 -16 0.59501 0.84034   3
  -3  -5  16 0.26427 0.69679   1
  -3   5  16 0.60765 0.46473   2
   3   5  16 0.38296 0.46829   2
  -3  -5 -16 0.02713 0.45300   2
   3  -5  16-0.10822 0.40224   2
   3  -5 -16-0.37709 0.41062   2
  -3  -5 -17 0.41330 0.41641   2
   3  -5 -17 0.26332 0.53414   3
   3  -5 -17 0.06837 0.44169   2
  -3  -5 -17 0.97886 0.68487   3
   3   5  17 0.90576 0.50721   2
  -3  -5  17 0.35238 0.38469   2
  -3   5  17 1.62503 0.49590   2
   3  -5  17 0.41269 0.38340   2
  -3  -5  17 0.69262 0.77192   1
   3  -5 -18 5.59058 0.56107   2
   3  -5 -18 5.25271 0.56998   3
  -3  -5 -18 5.98970 0.56638   2
  -3  -5  18 5.01695 0.80157   1
  -3  -5 -19 1.37390 0.48272   2
  -3  -5  19 0.39542 0.82125   1
   3  -5 -19 0.30804 0.90658   1
   3  -5 -19 0.37680 0.48017   2
   3  -5 -20 2.34703 0.54142   2
   3  -5 -20 1.51215 0.93921   1
  -3  -5  20 2.70988 0.81193   1
  -3  -5 -20 2.29410 0.53847   2
   3  -5 -21 3.94824 0.61016   2
  -3  -5  21 3.95661 0.89926   1
  -3  -5 -21 3.71290 0.58711   2
   3  -5 -21 4.61209 0.98750   1
   3  -5 -22-0.52415 0.97336   1
  -3  -5 -22 1.07106 0.57743   2
   3  -5 -22 1.01012 0.58131   2
  -3  -5  22 0.51864 0.71504   3
  -3  -5 -23 3.40428 0.60037   2
   3  -5 -23 3.45292 0.58977   2
   3  -5 -23 2.97621 1.02533   1
  -3  -5  23-0.13055 0.74020   3
   3  -5 -24 0.73120 0.61979   2
   3  -5 -24-0.73845 1.01975   1
  -3  -5 -24 0.03890 0.58449   2
  -3  -5  24-0.18174 0.70574   3
  -3  -5 -25 0.77995 0.63522   2
   3  -5 -25 0.86033 0.61941   2
   3  -5 -26 1.00211 0.67944   2
  -3  -5 -26 0.39954 0.64663   2
  -3  -5 -27 0.80585 0.69999   2
   3  -5 -27 0.42708 0.67450   2
   3  -5 -28 1.63570 0.71481   2
  -3  -5 -28 1.01647 0.72138   2
   3  -5 -29 0.56008 0.69782   2
  -3  -5 -29-0.73177 0.70521   2
   3  -5 -30 0.23361 0.73528   2
  -3  -5 -30 1.23311 0.74563   2
   3  -5 -31 0.38181 0.77757   2
  -3  -5 -31-0.13024 0.76300   2
  -3  -5 -32 1.20302 0.83469   2
   3  -5 -32 1.89886 0.81410   2
   3  -6   0 5.81400 0.72844   2
  -3  -6   0 6.78115 0.71765   2
  -3  -6  -1 22.4678 1.29952   2
   3  -6  -1 22.5581 1.31135   2
   3   6   2 2.58628 0.83646   2
  -3   6   2 3.93852 0.83948   2
  -3  -6  -2 2.43979 0.48744   2
   3  -6  -2 1.95023 0.46349   2
   3  -6  -3 12.0933 0.79796   2
  -3   6   3 12.3522 0.97036   2
  -3  -6  -3 12.1000 0.76701   2
   3   6   3 13.3007 0.99483   2
  -3   6   4 2.90874 0.65540   2
   3   6   4 3.05264 0.61088   2
   3  -6  -4 3.63981 0.45389   2
  -3  -6  -4 3.54515 0.45534   2
  -3   6   5 0.95916 0.53079   2
   3   6   5 0.90617 0.55005   2
   3  -6  -5 1.23986 0.41809   2
  -3  -6  -5 1.43559 0.35459   2
   3   6   6 12.3610 0.84105   2
  -3   6   6 11.3404 0.85935   2
  -3  -6  -6 12.8297 0.78283   2
  -3  -6   6 12.7262 0.92382   1
   3  -6  -6 12.6596 0.76414   2
  -3   6   7 0.58359 0.51046   2
   3   6   7 1.02438 0.50636   2
  -3  -6  -7 1.02336 0.37414   2
  -3  -6   7 0.19456 0.51277   1
   3  -6  -7 1.54045 0.39084   2
   3   6   8 3.09243 0.49819   2
   3  -6  -8 2.89651 0.42290   2
  -3  -6   8 3.28895 0.76447   1
  -3  -6  -8 3.55092 0.41377   2
  -3   6   8 2.08866 0.51885   2
  -3   6   9 11.5659 0.86182   2
   3   6   9 13.2241 0.86440   2
   3  -6  -9 13.9222 0.80833   2
  -3  -6  -9 13.3730 0.80799   2
  -3  -6   9 12.4164 1.00088   1
  -3   6  10 5.94333 0.61102   2
   3   6  10 6.12047 0.59325   2
   3  -6 -10 6.91422 0.51346   2
   3  -6  10 5.54919 0.50172   2
  -3  -6 -10 6.75327 0.52204   2
  -3  -6  10 5.70695 0.49006   2
  -3  -6  10 5.02359 0.76438   1
   3   6  11 1.46617 0.45635   2
  -3   6  11 1.19471 0.47364   2
  -3  -6  11 0.34541 0.37090   2
   3  -6 -11 0.40607 0.38739   2
   3  -6  11 0.68164 0.36453   2
  -3  -6  11 1.26637 0.69680   1
  -3  -6 -11 0.91048 0.40375   2
  -3  -6 -12 27.5035 1.56898   2
   3  -6  12 33.8032 1.58290   2
  -3  -6  12 31.2075 1.57640   2
   3  -6 -12 28.7192 1.57444   2
  -3   6  12 25.7949 1.58812   2
  -3  -6  12 27.0278 1.65584   1
   3   6  12 25.0887 1.58371   2
  -3  -6  13 0.36954 0.36477   2
  -3  -6  13-0.43784 0.74158   1
  -3  -6 -13 0.14456 0.39993   2
  -3   6  13-0.11122 0.50026   2
   3  -6 -13 0.00587 0.38137   2
  -3  -6 -13 0.24069 0.87608   3
   3   6  13-0.12217 0.50444   2
   3  -6  13 0.16089 0.36372   2
  -3  -6  14 8.38518 0.58844   2
   3  -6  14 9.23667 0.60014   2
   3   6  14 8.34881 0.67627   2
  -3  -6 -14 8.81778 0.62885   2
   3  -6 -14 8.43330 0.62408   2
  -3   6  14 7.40161 0.67442   2
  -3  -6 -14 8.64995 1.02220   3
  -3  -6  14 8.90418 0.84049   1
  -3  -6 -15 0.72168 0.43419   2
  -3  -6 -15 0.39366 0.88102   3
   3  -6 -15 0.39111 0.39914   2
   3   6  15 0.06068 0.48902   2
  -3   6  15 0.26367 0.46984   2
   3  -6  15 0.82750 0.39042   2
  -3  -6  15 0.37643 0.70970   1
  -3  -6  15 0.75483 0.39171   2
  -3  -6 -16 3.37073 0.89326   3
   3  -6  16 3.83422 0.44474   2
   3   6  16 2.87779 0.51222   2
  -3   6  16 3.33065 0.50166   2
  -3  -6  16 3.37752 0.75095   1
  -3  -6  16 4.49345 0.44954   2
   3  -6  16 2.55870 0.27490   1
   3  -6 -16 4.65726 0.49698   2
  -3  -6 -16 3.76506 0.50780   2
   3  -6 -17 0.22554 0.45038   2
  -3  -6 -17 0.59644 0.46896   2
   3   6  17 0.51124 0.48333   2
  -3  -6 -17-0.23490 0.93046   3
  -3  -6  17-0.08856 0.41969   2
   3  -6  17-0.07736 0.22822   1
  -3   6  17 0.87857 0.48181   2
  -3  -6  17 0.80443 0.71416   1
   3  -6  17 0.67446 0.41977   2
   3  -6 -18 3.58896 0.61335   3
  -3  -6  18 4.02129 0.82016   1
  -3  -6 -18 4.52831 0.90688   3
  -3  -6 -18 5.00030 0.52480   2
   3  -6 -18 3.97677 0.53996   2
   3  -6 -19 0.86771 0.50956   2
  -3  -6 -19 0.71134 0.50721   2
  -3  -6 -19 0.51931 0.73330   3
  -3  -6  19 2.18903 0.84233   1
   3  -6 -20 0.09096 0.50946   2
  -3  -6  20-0.05674 0.80404   1
  -3  -6 -20-0.49144 0.51682   2
  -3  -6  21 5.67272 0.96792   1
   3  -6 -21 8.64051 0.70948   2
  -3  -6 -21 7.05924 0.66270   2
   3  -6 -22 0.82977 1.03993   1
  -3  -6  22 2.23495 0.91109   1
  -3  -6 -22 2.10077 0.61190   2
   3  -6 -22 2.74926 0.58088   2
   3  -6 -23 8.95757 1.21124   1
   3  -6 -23 8.57961 0.80448   2
  -3  -6 -23 8.71849 0.76424   2
  -3  -6  23 8.10429 1.04833   1
   3  -6 -24 0.85568 0.63589   2
  -3  -6 -24 2.00312 0.64882   2
   3  -6 -24 1.40220 1.09690   1
  -3  -6  24 0.23403 0.79053   3
   3  -6 -25 1.07113 1.07806   1
   3  -6 -25 0.79167 0.66920   2
  -3  -6 -25 0.73574 0.64117   2
   3  -6 -26-0.02123 0.64778   2
  -3  -6 -26 0.32613 0.62964   2
   3  -6 -27 1.54255 0.69562   2
  -3  -6 -27-0.14754 0.68491   2
  -3  -6 -28-0.99504 0.71043   2
   3  -6 -28-0.45657 0.68992   2
  -3  -6 -29 0.03821 0.73857   2
   3  -6 -29 0.83387 0.80954   2
  -3  -6 -30-0.86130 0.75540   2
   3  -6 -30-0.10203 0.74809   2
  -3  -6 -31-0.01341 0.79043   2
   3  -6 -31-1.14051 0.80051   2
  -3  -6 -32 0.89106 0.83547   2
   3  -6 -32-0.72841 0.83323   2
  -3  -7   0 40.7708 2.32363   2
   3  -7   0 43.8490 2.33024   2
   3  -7   1 27.3547 1.76908   2
  -3  -7   1 27.8381 1.75729   2
  -3  -7  -1 30.0015 1.67311   2
   3  -7  -1 32.3142 1.68492   2
  -3  -7  -2 12.9278 0.86641   2
   3  -7  -2 13.4643 0.88078   2
   3   7   2 13.6791 1.15918   2
  -3   7   2 13.1944 1.17923   2
   3   7   3 21.1150 1.40512   2
   3  -7  -3 21.6799 1.20123   2
  -3  -7  -3 20.3991 1.19354   2
  -3   7   3 19.6072 1.38333   2
  -3  -7  -4 4.01869 0.51667   2
  -3   7   4 4.67600 0.75840   2
   3  -7  -4 4.58073 0.50637   2
   3   7   4 4.40550 0.79976   2
  -3  -7  -5 15.9135 0.94836   2
   3  -7  -5 16.0634 0.94198   2
   3   7   5 16.2032 1.07872   2
  -3   7   5 14.9630 1.07956   2
   3   7   6 11.5062 0.91801   2
  -3  -7  -6 14.3110 0.80351   2
   3  -7  -6 12.8672 0.82062   2
  -3  -7   6 11.9919 0.98123   1
  -3   7   6 13.3216 0.92709   2
   3  -7  -7 16.2687 0.95577   2
   3   7   7 14.3929 1.01656   2
  -3   7   7 14.9784 1.02934   2
  -3  -7  -7 16.3537 0.95001   2
  -3  -7   7 17.7436 1.10803   1
  -3  -7   8 22.3493 1.35017   1
   3   7   8 21.7651 1.28325   2
  -3  -7  -8 22.0143 1.22791   2
   3  -7  -8 22.4998 1.22190   2
  -3   7   8 19.4171 1.28895   2
  -3  -7  -9 5.05928 0.48659   2
  -3  -7   9 3.27556 0.63646   1
  -3   7   9 4.56099 0.62491   2
   3   7   9 4.68337 0.59977   2
   3  -7  -9 5.54517 0.52831   2
  -3   7  10 4.49223 0.59805   2
   3   7  10 6.37864 0.61937   2
  -3  -7  10 4.75655 0.81341   1
  -3  -7 -10 5.79251 0.53731   2
   3  -7 -10 5.26520 0.52524   2
  -3  -7  11 82.4986 4.30277   2
   3   7  11 75.8413 4.32375   2
   3  -7  11 84.7768 4.30320   2
  -3  -7 -11 85.4674 4.31598   2
   3  -7 -11 87.5445 4.31730   2
  -3  -7  11 79.1334 4.35442   1
  -3   7  11 77.8440 4.32634   2
  -3   7  12 26.2567 1.59464   2
  -3  -7  12 30.0632 1.65931   1
  -3  -7  12 28.5765 1.54692   2
   3  -7 -12 29.6474 1.56730   2
   3  -7  12 29.4195 1.54726   2
   3   7  12 26.9706 1.59075   2
  -3  -7 -12 27.4275 1.56913   2
  -3   7  13 1.37827 0.50676   2
   3  -7  13 1.22278 0.41954   2
  -3  -7  13 1.13752 0.40085   2
   3   7  13 1.55932 0.51029   2
   3  -7 -13 1.64659 0.43653   2
  -3  -7 -13 2.05052 0.43021   2
  -3  -7  13 2.24116 0.71960   1
   3  -7  14 0.51446 0.42063   2
  -3   7  14 0.39793 0.49418   2
   3  -7 -14 0.08070 0.41825   2
  -3  -7 -14 0.04824 0.41486   2
   3   7  14-0.13179 0.51023   2
  -3  -7  14 0.59261 0.40559   2
  -3  -7  14 0.65733 0.68919   1
   3  -7  15 0.43087 0.42889   2
   3   7  15 0.37163 0.48434   2
  -3  -7  15-0.24038 0.74557   1
  -3  -7  15-0.22943 0.41846   2
   3  -7 -15-0.20751 0.44927   2
  -3   7  15-0.00750 0.50102   2
  -3  -7 -15 0.04269 0.44221   2
  -3  -7 -15 0.43467 0.88386   3
   3   7  16 3.52219 0.56233   2
   3  -7 -16 4.44772 0.51047   2
   3  -7  16 4.09260 0.47555   2
  -3  -7  16 4.79199 0.79398   1
  -3  -7  16 3.47045 0.46625   2
  -3  -7 -16 5.08329 0.96089   3
  -3   7  16 3.75706 0.58295   2
  -3  -7 -16 4.78202 0.51884   2
   3  -7  17 6.99234 0.53943   1
  -3  -7 -17 9.13259 0.65728   2
  -3  -7  17 8.54542 0.89269   1
   3  -7 -17 9.01330 0.66311   2
  -3  -7 -17 7.60507 1.01458   3
   3  -7  18 1.44125 0.33338   1
  -3  -7  18 2.51814 0.79744   1
   3  -7 -18 1.94550 0.52536   2
  -3  -7 -18 1.17740 0.95631   3
  -3  -7 -18 1.51887 0.48665   2
  -3  -7 -19 4.40142 0.98532   3
  -3  -7  19 4.48078 0.82941   1
   3  -7  19 2.40383 0.31293   1
   3  -7 -19 4.35284 0.56395   2
  -3  -7 -19 4.25135 0.57180   2
   3  -7 -20 0.32038 0.53085   2
  -3  -7  20-0.71864 0.92462   1
  -3  -7 -20 0.15073 0.51349   2
  -3  -7 -20-0.23021 0.89392   3
   3  -7 -21 2.07462 0.58551   2
  -3  -7  21 0.94985 0.90267   1
  -3  -7 -21 2.46428 0.58730   2
   3  -7 -22-0.17716 0.57299   2
  -3  -7  22-0.27620 0.90163   1
  -3  -7 -22-0.28649 0.57709   2
   3  -7 -23 3.39158 0.65004   2
  -3  -7 -23 2.60047 0.62712   2
  -3  -7  23 2.32755 0.98379   1
   3  -7 -23 3.14463 1.14148   1
   3  -7 -24 1.74187 0.65868   2
   3  -7 -24 1.61904 1.14564   1
  -3  -7 -24 1.07454 0.64735   2
   3  -7 -25-0.37172 0.69862   2
   3  -7 -25 1.64532 1.16825   1
  -3  -7 -25-0.13344 0.64153   2
   3  -7 -26 0.06752 0.69164   2
  -3  -7 -26 0.05757 0.66419   2
  -3  -7 -27 4.07610 0.74345   2
   3  -7 -27 1.93987 0.71031   2
   3  -7 -28-0.17669 0.69523   2
  -3  -7 -28 1.80874 0.72387   2
   3  -7 -29 0.42897 0.73867   2
  -3  -7 -29 1.96959 0.77908   2
   3  -7 -30 0.06514 0.77229   2
  -3  -7 -30 1.14600 0.78350   2
   3  -7 -31 1.66962 0.87496   2
  -3  -7 -31 1.15272 0.87665   2
  -3  -7 -32 0.08546 0.82958   2
   3  -7 -32-1.65635 0.84430   2
   3  -8   0 52.2825 2.69942   2
  -3  -8   0 46.7741 2.67908   2
   3  -8  -1 4.05253 0.61255   2
  -3  -8  -1 3.37221 0.66167   2
  -3  -8   1 3.05937 0.77000   2
   3  -8   1 2.72758 0.81980   2
   3  -8  -2 1.60604 0.51472   2
  -3  -8  -2 2.06793 0.56182   2
  -3   8   3 16.4811 1.36113   2
   3   8   3 18.6027 1.32738   2
  -3  -8  -3 16.0306 1.03899   2
   3  -8  -3 18.2812 1.04740   2
  -3   8   4 34.9692 2.09373   2
   3  -8  -4 36.0306 1.97023   2
  -3  -8  -4 36.5088 1.97287   2
   3   8   4 37.3762 2.10450   2
  -3  -8  -5 4.02580 0.52118   2
   3   8   5 3.36053 0.81279   2
   3  -8  -5 4.41255 0.52402   2
  -3   8   5 4.67735 0.80161   2
   3  -8  -6 11.5652 0.76682   2
  -3  -8  -6 11.4646 0.80121   2
   3   8   6 11.9969 0.96004   2
  -3   8   6 11.9751 0.92778   2
  -3   8   7-0.10564 0.63365   2
   3  -8  -7-0.04277 0.48211   2
   3   8   7 0.01472 0.60973   2
  -3  -8  -7-0.06241 0.42283   2
  -3   8   8 1.41182 0.57855   2
   3  -8  -8-0.33542 0.47962   2
   3   8   8 0.65169 0.59310   2
  -3  -8   8 0.52089 0.73702   1
  -3  -8  -8 0.09350 0.42593   2
  -3   8   9 26.6413 1.70403   2
  -3  -8  -9 31.2823 1.66803   2
   3  -8  -9 30.9817 1.67238   2
  -3  -8   9 31.5978 1.77844   1
   3   8   9 31.3193 1.71792   2
  -3  -8  10 1.11188 0.58725   1
  -3   8  10 1.27544 0.55774   2
   3  -8 -10 0.30517 0.42244   2
   3   8  10-0.02189 0.57041   2
  -3  -8 -10 0.95670 0.43672   2
  -3   8  11 1.82747 0.58061   2
  -3  -8  11 1.24149 0.71363   1
   3  -8 -11 1.41027 0.43100   2
  -3  -8 -11 1.59216 0.45576   2
   3   8  11 1.10248 0.54179   2
   3  -8 -12 0.63751 0.44251   2
   3  -8  12 0.09824 0.41319   2
  -3   8  12 0.59716 0.53260   2
  -3  -8  12 0.67664 0.75486   1
  -3  -8 -12 1.31280 0.46163   2
  -3  -8  12 0.76312 0.39410   2
   3   8  12-0.23795 0.54911   2
  -3  -8  13-0.22694 0.40917   2
   3  -8  13-0.06271 0.41034   2
  -3   8  13 0.24881 0.52320   2
  -3  -8  13 0.11457 0.70775   1
   3   8  13 0.00755 0.53264   2
   3  -8 -13-0.06971 0.46572   2
  -3  -8 -13-0.12850 0.43360   2
   3  -8 -14 2.77470 0.49828   2
  -3  -8  14 3.16699 0.45773   2
  -3   8  14 2.94001 0.56404   2
   3  -8  14 2.31607 0.46109   2
   3   8  14 3.88067 0.59027   2
  -3  -8  14 3.08971 0.74829   1
  -3  -8 -14 2.38929 0.47605   2
  -3  -8  15 5.28981 0.87064   1
  -3  -8  15 8.41618 0.64101   2
   3  -8 -15 9.30433 0.67953   2
   3  -8  15 7.90043 0.65748   2
  -3   8  15 6.78713 0.69761   2
  -3  -8 -15 7.85232 0.66144   2
   3   8  15 6.96270 0.69158   2
  -3  -8 -16 0.51511 0.46496   2
  -3  -8  16 0.39696 0.79266   1
   3  -8 -16 1.02909 0.47366   2
  -3  -8 -16-0.33975 0.98898   3
  -3  -8 -17-0.40402 0.95222   3
   3  -8 -17 0.40572 0.50852   2
  -3  -8  17 0.43025 0.79323   1
  -3  -8 -17-0.08308 0.49547   2
   3  -8 -18 0.04987 0.52504   2
   3  -8  18-0.53169 0.40919   1
  -3  -8 -18-0.11068 0.52017   2
  -3  -8 -18-0.61187 0.97718   3
  -3  -8  18-0.28554 0.81276   1
  -3  -8 -19 0.24208 0.53841   2
   3  -8  19-0.07503 0.38951   1
  -3  -8  19-0.04882 0.84045   1
  -3  -8 -19 0.64389 0.97954   3
   3  -8 -19-0.58683 0.54358   2
  -3  -8 -20-0.65967 1.05567   3
  -3  -8 -20 0.50387 0.53188   2
   3  -8 -20 0.93895 0.55596   2
   3  -8  20 0.46372 0.38312   1
  -3  -8  20 1.16532 0.87655   1
   3  -8 -21 14.0329 0.83751   2
  -3  -8  21 12.2325 1.07919   1
  -3  -8 -21 13.1044 0.82279   2
  -3  -8 -22 5.75660 0.67730   2
  -3  -8  22 5.56379 1.02421   1
   3  -8 -22 5.74872 0.70428   2
  -3  -8  23 5.42237 0.99222   1
  -3  -8 -23 5.60307 0.71847   2
   3  -8 -23 5.56435 0.69753   2
  -3  -8 -24 0.52470 0.65852   2
   3  -8 -24-0.08368 0.62341   2
   3  -8 -25 2.84804 1.22033   1
   3  -8 -25 3.51046 0.72569   2
  -3  -8 -25 4.02341 0.71422   2
  -3  -8 -26 0.63789 0.72524   2
   3  -8 -26 2.49291 0.71684   2
  -3  -8 -27 1.62335 0.72658   2
   3  -8 -27 2.09055 0.72257   2
   3  -8 -28 0.92730 0.75664   2
  -3  -8 -28 1.74513 0.72349   2
  -3  -8 -29 1.38443 0.77464   2
   3  -8 -29 2.13809 0.76675   2
  -3  -8 -30 0.23818 0.76379   2
   3  -8 -30 0.54347 0.74494   2
  -3  -8 -31-0.15392 0.78685   2
   3  -8 -31-0.31475 0.82192   2
  -3  -9   0 35.0824 1.95433   2
   3  -9   0 32.9618 1.94674   2
   3  -9   1 0.62764 0.83086   2
  -3  -9   1 1.79715 0.77719   2
   3  -9  -1 0.97154 0.62921   2
  -3  -9  -1 0.43318 0.63281   2
  -3  -9  -2 24.8017 1.47856   2
   3  -9  -2 26.1221 1.47818   2
  -3   9   3 2.64638 1.05206   2
   3   9   3 2.60894 0.99321   2
  -3  -9  -3 1.66574 0.51775   2
   3  -9  -3 2.64173 0.57126   2
  -3  -9  -4-0.59703 0.52830   2
   3   9   4 0.17530 0.92324   2
   3  -9  -4 0.19613 0.50776   2
  -3   9   4-0.30439 0.96240   2
  -3   9   5 2.99884 0.91521   2
  -3  -9  -5 2.95751 0.53840   2
   3  -9  -5 2.20403 0.53083   2
   3   9   5 2.39647 0.82484   2
  -3  -9  -6 0.15069 0.45306   2
   3   9   6-0.24285 0.80110   2
   3  -9  -6-0.88126 0.51552   2
  -3   9   6-0.73991 0.75828   2
   3  -9  -7 51.5597 2.75632   2
  -3   9   7 49.7195 2.81084   2
   3   9   7 53.1149 2.82067   2
  -3  -9  -7 52.0439 2.75042   2
  -3   9   8 3.98021 0.71877   2
   3   9   8 4.16078 0.71751   2
   3  -9  -8 5.20996 0.57479   2
  -3  -9  -8 5.20401 0.55659   2
  -3  -9   9 3.26951 0.75312   1
   3   9   9 1.71697 0.65978   2
  -3   9   9 1.88944 0.61733   2
   3  -9  -9 1.44321 0.49215   2
  -3  -9  -9 2.25293 0.47947   2
  -3  -9 -10 3.24190 0.53426   2
   3   9  10 3.16913 0.64470   2
  -3   9  10 2.28578 0.63696   2
  -3  -9  10 3.52748 0.75721   1
   3  -9 -10 3.54557 0.51605   2
  -3  -9  11 16.2646 1.14622   1
  -3   9  11 15.6047 1.09831   2
  -3  -9 -11 17.6555 1.01728   2
   3  -9 -11 16.9840 1.03280   2
   3   9  11 16.8617 1.09965   2
   3  -9 -12 3.99901 0.51412   2
  -3   9  12 1.47162 0.58834   2
   3   9  12 2.18316 0.62333   2
  -3  -9 -12 2.40503 0.49357   2
  -3  -9  12 1.21088 0.68886   1
  -3  -9  13 0.16824 0.43226   2
   3  -9 -13-0.11722 0.47879   2
  -3   9  13 1.16093 0.58697   2
   3   9  13 0.41542 0.57438   2
   3  -9  13-0.47673 0.43782   2
  -3  -9 -13 0.24789 0.48439   2
  -3  -9  13-0.70588 0.93223   1
  -3  -9  14 5.94541 0.54950   2
  -3  -9 -14 6.60481 0.59829   2
   3  -9  14 5.42765 0.53771   2
   3   9  14 5.96878 0.67124   2
  -3   9  14 4.94287 0.68018   2
   3  -9 -14 5.93330 0.59882   2
  -3  -9  14 5.04036 0.85232   1
  -3  -9  15 0.05602 0.43646   2
  -3  -9 -15-0.19543 0.50779   2
   3  -9 -15-0.15119 0.47724   2
   3  -9  15-0.17856 0.43970   2
  -3  -9  15 1.23137 0.77767   1
   3  -9 -16 2.73266 0.56147   2
  -3  -9  16 2.62181 0.81734   1
  -3  -9 -16 3.88099 0.55828   2
  -3  -9  17 2.68297 0.83792   1
   3  -9 -17 1.63792 0.53083   2
  -3  -9 -17 1.17746 0.52157   2
  -3  -9 -18 5.74176 0.65433   2
  -3  -9 -18 5.22704 1.07936   3
   3  -9 -18 5.99111 0.66558   2
  -3  -9  18 6.17458 0.93929   1
   3  -9 -19 5.46892 0.61402   2
   3  -9  19 2.84638 0.50298   1
  -3  -9  19 3.82387 0.94725   1
  -3  -9 -19 4.84058 0.63531   2
  -3  -9 -19 5.41283 1.06664   3
   3  -9 -20 4.61623 0.61717   2
   3  -9  20 3.46542 0.52721   1
  -3  -9 -20 5.34234 0.67304   2
  -3  -9 -20 5.19098 1.10756   3
  -3  -9  20 4.09113 0.97103   1
  -3  -9  21 14.1630 1.30414   1
   3  -9 -21 16.5265 1.09538   2
  -3  -9 -21 17.2382 1.08523   2
  -3  -9 -22-1.08599 0.65992   2
  -3  -9  22-0.77090 0.94894   1
   3  -9 -22-1.09266 0.66000   2
   3  -9 -23-0.29528 0.66070   2
  -3  -9 -23-0.54734 0.64971   2
  -3  -9 -24-0.01113 0.64029   2
   3  -9 -24-0.26119 0.65849   2
   3  -9 -25-0.22443 0.67671   2
  -3  -9 -25 0.24103 0.67947   2
   3  -9 -26 1.45475 0.70289   2
  -3  -9 -26 0.89978 0.71461   2
  -3  -9 -27 0.37034 0.75372   2
   3  -9 -27-0.61198 0.73807   2
  -3  -9 -28 0.19730 0.77130   2
   3  -9 -28 1.44010 0.77548   2
   3  -9 -29 0.42261 0.81776   2
  -3  -9 -29 1.43114 0.76698   2
  -3  -9 -30 0.01384 0.83840   2
   3  -9 -30-0.68993 0.82339   2
   3  -9 -31 1.36029 0.82204   2
  -3  -9 -31 3.17568 0.86546   2
  -3 -10   0 6.55280 0.79558   2
   3 -10   0 7.10907 0.87108   2
   3 -10  -1 0.41096 0.73063   2
  -3 -10   1 1.06937 0.75570   2
   3 -10   1 1.38062 0.87523   2
  -3 -10  -1 0.02832 0.61002   2
   3 -10   2 4.71118 0.96758   2
  -3 -10  -2 6.75228 0.68828   2
   3 -10  -2 6.91071 0.75732   2
  -3 -10   2 4.36381 0.97187   2
  -3 -10  -3 3.94802 0.61296   2
   3 -10  -3 3.91210 0.65837   2
   3  10   4 8.73665 1.10957   2
  -3 -10  -4 5.24034 0.62891   2
   3 -10  -4 5.51889 0.64441   2
  -3  10   4 7.05862 1.11758   2
  -3  10   5-0.02458 0.94562   2
   3  10   5 0.33766 0.96877   2
  -3 -10  -5 0.76616 0.54846   2
   3 -10  -5 0.60720 0.53623   2
   3  10   6 0.40879 0.88078   2
  -3 -10  -6 0.73512 0.55192   2
  -3  10   6 0.05798 0.86918   2
   3 -10  -6-0.15868 0.50659   2
  -3  10   7 0.88833 0.79989   2
   3  10   7 2.25922 0.80463   2
   3 -10  -7 0.63421 0.49136   2
  -3 -10  -7 1.22997 0.53341   2
   3 -10  -8 6.55203 0.61398   2
  -3  10   8 6.38899 0.85087   2
  -3 -10  -8 6.51947 0.65149   2
   3  10   8 7.50746 0.78875   2
   3  10   9 8.74558 0.86220   2
  -3  10   9 6.97248 0.81286   2
   3 -10  -9 7.92234 0.68224   2
  -3 -10  -9 9.09034 0.71246   2
   3 -10 -10 1.70981 0.48030   2
  -3 -10 -10 1.73783 0.46209   2
  -3 -10  10 1.00135 0.75253   1
  -3  10  10 1.12559 0.65133   2
   3  10  10 1.37222 0.66238   2
   3  10  11 3.47537 0.67885   2
  -3  10  11 2.80537 0.67826   2
  -3 -10 -11 4.10588 0.55250   2
   3 -10 -11 2.80719 0.58363   2
  -3 -10  11 4.79054 0.81172   1
   3  10  12 18.3415 1.19929   2
  -3  10  12 17.7977 1.22126   2
  -3 -10  12 18.3967 1.27267   1
   3 -10 -12 20.8540 1.16308   2
  -3 -10 -12 19.3571 1.13073   2
  -3 -10  13-0.52229 0.72183   1
  -3  10  13 0.05843 0.65484   2
   3  10  13 0.77081 0.64239   2
   3 -10 -13 0.73488 0.51458   2
  -3 -10 -13 0.22541 0.50773   2
  -3 -10 -14 0.22411 0.52492   2
  -3 -10  14-0.12900 1.01436   1
   3 -10  14 0.12026 0.47322   2
   3 -10 -14 0.19857 0.53402   2
   3 -10 -15 1.81782 0.55419   2
  -3 -10  15 1.97623 0.80970   1
  -3 -10 -15 1.96305 0.54303   2
  -3 -10  16 0.80206 0.87115   1
  -3 -10 -16-0.23239 0.53667   2
   3 -10 -16 0.57674 0.52853   2
  -3 -10  17 10.8404 1.11947   1
  -3 -10 -17 11.9253 0.88891   2
   3 -10 -17 12.1283 0.88067   2
  -3 -10  18 1.94144 0.95546   1
   3 -10 -18 0.89870 0.58630   2
  -3 -10 -18 1.52912 0.56807   2
  -3 -10 -19 14.5850 1.46252   3
   3 -10 -19 17.8545 1.10704   2
  -3 -10 -19 17.3926 1.09114   2
  -3 -10  19 14.4382 1.31519   1
  -3 -10  20 6.20093 1.03049   1
  -3 -10 -20 4.98265 0.64830   2
   3 -10 -20 6.26229 0.66134   2
   3 -10  20 3.55970 0.48476   1
  -3 -10 -21 0.15880 0.65830   2
  -3 -10  21 0.88142 0.97167   1
   3 -10 -21 0.88376 0.67315   2
   3 -10 -22-0.14883 0.63848   2
  -3 -10  22 0.35645 0.97479   1
  -3 -10 -22 0.98907 0.64434   2
   3 -10 -23 3.74805 0.73520   2
  -3 -10 -23 1.92616 0.69234   2
   3 -10 -24 4.41030 0.74552   2
  -3 -10 -24 5.08813 0.71912   2
  -3 -10 -25 0.66741 0.70377   2
   3 -10 -25 0.38475 0.69911   2
   3 -10 -26 1.19437 0.74328   2
  -3 -10 -26 0.02467 0.72992   2
  -3 -10 -27 0.49702 0.72400   2
   3 -10 -27 1.00985 0.78762   2
  -3 -10 -28 2.00931 0.80414   2
   3 -10 -28 3.42741 0.82278   2
   3 -10 -29 0.83955 0.80095   2
  -3 -10 -29-1.80023 0.80410   2
   3 -10 -30 0.32347 0.81174   2
  -3 -10 -30 0.71891 0.80943   2
   3 -11   0 16.0970 1.16057   2
  -3 -11   0 15.0236 1.18090   2
   3 -11  -1 5.61886 0.74133   2
   3 -11   1 4.03989 0.86604   2
  -3 -11   1 3.53194 0.89704   2
  -3 -11  -1 4.32331 0.77795   2
  -3 -11   2 10.7117 1.06915   2
   3 -11  -2 10.0579 0.86934   2
   3 -11   2 8.42991 1.05608   2
  -3 -11  -2 9.77715 0.81880   2
  -3 -11  -3 4.19287 0.61789   2
   3 -11  -3 4.62487 0.64571   2
   3  11   4 14.6686 1.35984   2
  -3  11   4 11.3580 1.30707   2
  -3 -11  -4 11.7095 0.90076   2
   3 -11  -4 14.6399 0.93354   2
  -3  11   5 1.37471 1.01003   2
  -3 -11  -5 0.33351 0.57296   2
   3  11   5 0.77877 1.04325   2
   3 -11  -5 0.72582 0.54679   2
   3 -11  -6 15.7876 1.01635   2
  -3  11   6 16.2974 1.29526   2
   3  11   6 15.7890 1.28757   2
  -3 -11  -6 15.0086 0.99980   2
  -3  11   7 24.1087 1.61981   2
   3  11   7 26.5353 1.60977   2
  -3 -11  -7 25.0468 1.42832   2
   3 -11  -7 23.2003 1.41103   2
  -3  11   8 1.63577 0.85022   2
   3  11   8 1.41291 0.81598   2
   3 -11  -8 2.44371 0.53494   2
  -3 -11  -8 1.36920 0.51981   2
  -3  11   9 16.5295 1.25342   2
  -3 -11  -9 18.7809 1.12323   2
   3 -11  -9 17.9808 1.12103   2
   3  11   9 18.6079 1.25985   2
   3  11  10 1.20795 0.71140   2
  -3  11  10 0.37331 0.73753   2
  -3 -11 -10 0.32165 0.48056   2
   3 -11 -10 1.01303 0.52548   2
  -3 -11  11 0.32080 0.78450   1
   3  11  11 1.24089 0.70269   2
   3 -11 -11-0.62273 0.54197   2
  -3 -11 -11-0.08586 0.49717   2
  -3  11  11-1.26491 0.74305   2
   3  11  12 1.60155 0.69837   2
  -3  11  12 0.42243 0.67353   2
   3 -11 -12 1.37716 0.57360   2
  -3 -11 -12 0.39921 0.54602   2
  -3 -11  12-0.51887 0.83786   1
  -3 -11  13 0.89487 0.82596   1
   3 -11 -13 1.30741 0.49815   2
  -3 -11 -13 1.13920 0.53755   2
   3 -11 -14 6.12498 0.64126   2
  -3 -11 -14 5.34606 0.62775   2
  -3 -11  14 3.51185 0.78299   1
  -3 -11  15 2.46526 0.99536   1
  -3 -11 -15 0.61343 0.57533   2
   3 -11 -15 1.72692 0.58451   2
   3 -11 -16 19.7283 1.17823   2
  -3 -11 -16 20.1560 1.18732   2
  -3 -11  16 15.3284 1.33949   1
   3 -11 -17 1.65825 0.61239   2
  -3 -11 -17 1.87021 0.60716   2
  -3 -11  17 2.38976 0.93971   1
   3 -11 -18 18.0942 1.17747   2
  -3 -11 -18 19.2971 1.17953   2
  -3 -11  18 14.0580 1.40470   1
  -3 -11  19 8.30678 1.17026   1
   3 -11 -19 12.1356 0.87077   2
  -3 -11 -19 11.2401 0.85619   2
   3 -11 -20 1.97193 0.64834   2
  -3 -11 -20 0.90663 0.63222   2
  -3 -11  20 1.91519 1.06006   1
  -3 -11 -21 9.14539 0.83341   2
   3 -11 -21 8.39217 0.84324   2
  -3 -11  21 6.88923 1.13481   1
   3 -11 -22 0.60522 0.68845   2
  -3 -11  22 1.71892 1.01336   1
  -3 -11 -22 0.40088 0.66158   2
   3 -11 -23-0.36576 0.67820   2
  -3 -11 -23-1.09837 0.67860   2
   3 -11 -24 0.01193 0.68900   2
  -3 -11 -24 1.35440 0.71863   2
   3 -11 -25-0.25736 0.76723   2
  -3 -11 -25-0.03757 0.73474   2
   3 -11 -26 1.32049 0.72818   2
  -3 -11 -26 0.28013 0.73292   2
  -3 -11 -27 0.60467 0.74940   2
   3 -11 -27 0.68200 0.75113   2
   3 -11 -28 3.82126 0.81095   2
  -3 -11 -28 3.01035 0.80956   2
  -3 -11 -29 0.41803 0.83029   2
   3 -11 -29 0.07057 0.82820   2
  -3 -11 -30 1.89357 0.88371   2
   3 -11 -30 1.00682 0.88784   2
   3 -12   0 20.0083 1.31690   2
  -3 -12   0 18.1019 1.31368   2
   3 -12   1 5.29422 0.88975   2
  -3 -12   1 4.11509 0.88211   2
   3 -12  -1 4.62058 0.74683   2
  -3 -12  -1 4.81085 0.77522   2
   3 -12   2 22.6194 1.65768   2
   3 -12  -2 26.7303 1.52656   2
  -3 -12   2 24.1094 1.68268   2
  -3 -12  -2 26.5129 1.53086   2
   3 -12  -3 16.6299 1.08230   2
   3 -12   3 13.1984 1.27802   2
  -3 -12   3 15.2777 1.34196   2
  -3 -12  -3 18.4166 1.09703   2
   3 -12  -4 10.0506 0.83838   2
  -3 -12  -4 10.6852 0.83215   2
   3 -12  -5 0.74013 0.57875   2
   3  12   5-0.03156 1.09954   2
  -3  12   5-0.92641 1.14285   2
  -3 -12  -5 0.97318 0.55519   2
  -3  12   6-0.06115 1.07004   2
  -3 -12  -6 0.05539 0.53852   2
   3 -12  -6 1.04770 0.56971   2
   3  12   6 0.10482 1.00592   2
   3  12   7 9.86380 1.13628   2
  -3  12   7 7.50588 1.11768   2
  -3 -12  -7 9.37536 0.73922   2
   3 -12  -7 8.50070 0.77190   2
  -3  12   8 9.63732 1.07122   2
   3 -12  -8 8.82847 0.78171   2
  -3 -12  -8 9.80048 0.79281   2
   3  12   8 9.10177 1.06655   2
   3 -12  -9-0.12430 0.54487   2
   3  12   9 0.05112 0.85070   2
  -3 -12  -9-0.58384 0.53148   2
  -3  12   9-0.40607 0.83602   2
  -3  12  10-0.83979 0.84017   2
   3  12  10 0.10994 0.81933   2
   3 -12 -10-1.16403 0.59026   2
  -3 -12 -10-0.31287 0.56173   2
  -3  12  11 1.75230 0.78309   2
   3 -12 -11 1.41401 0.56249   2
  -3 -12 -11 0.24422 0.54270   2
   3 -12 -12 8.96197 0.72135   2
  -3 -12 -12 6.48000 0.71991   2
  -3 -12  12 6.42037 0.97516   1
  -3 -12  13 5.18174 0.96303   1
   3 -12 -13 4.02798 0.66294   2
  -3 -12 -13 6.13489 0.66589   2
   3 -12 -14 1.34289 0.62308   2
  -3 -12 -14 1.87441 0.58443   2
  -3 -12  14 2.06015 0.88141   1
  -3 -12 -15 4.98355 0.67140   2
   3 -12 -15 3.55537 0.68300   2
  -3 -12  15 3.27000 0.88393   1
  -3 -12 -16 16.2214 1.08322   2
   3 -12 -16 16.3893 1.08281   2
  -3 -12  16 15.4818 1.41143   1
   3 -12 -17 16.7831 1.05632   2
  -3 -12  17 11.9403 1.26214   1
  -3 -12 -17 14.5714 1.03123   2
  -3 -12 -18 3.82966 0.67776   2
   3 -12 -18 3.76197 0.67205   2
  -3 -12  18 4.20519 1.05999   1
  -3 -12  19 10.5119 1.19838   1
  -3 -12 -19 9.13593 0.86761   2
   3 -12 -19 9.62030 0.87205   2
  -3 -12  20 0.42048 1.04337   1
   3 -12 -20 0.41921 0.64272   2
  -3 -12 -20 0.23051 0.64794   2
   3 -12 -21 0.33727 0.67212   2
  -3 -12 -21 1.57288 0.66498   2
  -3 -12  21 1.12104 1.07055   1
  -3 -12 -22 3.91874 0.73688   2
   3 -12 -22 5.73974 0.76745   2
  -3 -12 -23 0.94637 0.73661   2
   3 -12 -23 2.10502 0.74301   2
  -3 -12 -24 0.75061 0.72073   2
   3 -12 -24 0.71025 0.72370   2
   3 -12 -25-0.02553 0.73757   2
  -3 -12 -25-0.36492 0.76309   2
  -3 -12 -26 1.58930 0.78361   2
   3 -12 -26 0.30082 0.79314   2
  -3 -12 -27-0.02710 0.76414   2
   3 -12 -27 0.07959 0.80888   2
   3 -12 -28 0.53356 0.82140   2
  -3 -12 -28 0.11175 0.77189   2
  -3 -12 -29 0.63274 0.81791   2
   3 -12 -29 0.83062 0.85225   2
   3 -13   0 3.88620 0.87207   2
  -3 -13   0 3.40274 0.80384   2
  -3 -13   1 9.71841 0.96547   2
  -3 -13  -1 8.52363 0.86372   2
   3 -13  -1 9.05554 0.93760   2
   3 -13   1 7.83997 1.03702   2
   3 -13  -2 7.76276 0.83326   2
  -3 -13   2 7.93083 0.99235   2
  -3 -13  -2 7.17741 0.83232   2
   3 -13   2 8.62685 1.04126   2
  -3 -13   3 0.29151 0.93756   2
  -3 -13  -3 0.98745 0.60576   2
   3 -13   3 0.95849 1.02254   2
   3 -13  -3 0.46463 0.65419   2
  -3 -13  -4 0.10048 0.60286   2
   3 -13  -4 0.72718 0.60690   2
  -3 -13  -5 27.5089 1.57192   2
   3 -13  -5 28.1208 1.59213   2
  -3  13   5 24.5527 1.89047   2
   3  13   5 24.7704 1.92694   2
  -3  13   6 1.92278 1.15302   2
   3  13   6-0.17130 1.10701   2
   3 -13  -6 0.73261 0.60910   2
  -3 -13  -6 0.65849 0.61199   2
  -3 -13  -7 2.68258 0.58589   2
  -3  13   7 0.93813 1.11237   2
   3 -13  -7 1.03197 0.58313   2
   3  13   7 0.61594 1.08355   2
  -3  13   8 5.20239 1.08900   2
  -3 -13  -8 5.05810 0.65032   2
   3 -13  -8 4.30364 0.64444   2
   3  13   8 4.19802 1.08118   2
   3 -13  -9 3.72428 0.59629   2
  -3  13   9 2.01239 1.02168   2
  -3 -13  -9 3.99404 0.61861   2
  -3 -13 -10 1.58489 0.59885   2
   3 -13 -10 2.56225 0.59730   2
  -3 -13 -11 0.80127 0.57467   2
   3 -13 -11 0.04864 0.58386   2
   3 -13 -12 7.39273 0.69959   2
  -3 -13 -12 6.55902 0.70555   2
  -3 -13  13 13.6930 1.35373   1
   3 -13 -13 18.9414 1.16637   2
  -3 -13 -13 18.4751 1.18605   2
   3 -13 -14 4.55515 0.68294   2
  -3 -13  14 3.80824 1.05080   1
  -3 -13 -14 3.36585 0.68161   2
   3 -13 -15 25.9654 1.44214   2
  -3 -13  15 19.4406 1.55915   1
  -3 -13 -15 24.2858 1.44903   2
  -3 -13  16 2.56371 0.96506   1
   3 -13 -16 3.65294 0.69641   2
  -3 -13 -16 3.47470 0.72913   2
   3 -13 -17 9.43305 0.86079   2
  -3 -13 -17 8.28187 0.86521   2
   3 -13 -18 0.43373 0.67871   2
  -3 -13 -18 1.29744 0.67095   2
   3 -13 -19 1.60421 0.69613   2
  -3 -13 -19 2.37943 0.68592   2
  -3 -13 -20 2.77078 0.68957   2
   3 -13 -20 1.75581 0.73549   2
  -3 -13 -21 0.17648 0.67952   2
   3 -13 -21 0.13832 0.70418   2
  -3 -13 -22-0.24615 0.72524   2
   3 -13 -22 1.12168 0.74429   2
  -3 -13 -23-0.49786 0.72736   2
   3 -13 -23 0.45111 0.70895   2
   3 -13 -24-0.38574 0.79736   2
  -3 -13 -24 0.11763 0.78412   2
   3 -13 -25 5.31890 0.83302   2
  -3 -13 -25 5.01433 0.82096   2
   3 -13 -26 0.77492 0.81708   2
  -3 -13 -26 1.41503 0.79721   2
   3 -13 -27-1.80859 0.84101   2
  -3 -13 -27 0.44997 0.83495   2
  -3 -13 -28 1.84002 0.82602   2
   3 -13 -28 1.74718 0.84919   2
  -3 -14   0 1.51985 0.81350   2
   3 -14   0-0.12314 0.78712   2
   3 -14  -1 4.92852 0.82938   2
  -3 -14   1 4.16796 0.90404   2
   3 -14   1 6.36200 0.93340   2
  -3 -14  -1 4.97193 0.80362   2
  -3 -14   2 4.85712 0.90008   2
   3 -14   2 0.73566 0.99282   2
  -3 -14  -2 3.72807 0.71784   2
   3 -14  -2 2.31320 0.71952   2
  -3 -14   3-0.64088 0.94321   2
   3 -14   3 1.40341 1.03554   2
  -3 -14  -3 0.87582 0.64458   2
   3 -14  -3 0.64442 0.66339   2
   3 -14  -4 0.36379 0.64207   2
  -3 -14   4 2.64801 1.02644   2
   3 -14   4 0.65178 1.08879   2
  -3 -14  -4 0.38814 0.61137   2
   3 -14  -5 0.33576 0.64612   2
  -3 -14  -5 0.55745 0.65234   2
  -3 -14  -6 0.71742 0.63300   2
  -3  14   6 0.96548 1.26628   2
   3 -14  -6 0.48836 0.63588   2
   3 -14  -7 0.89998 0.65698   2
  -3 -14  -7 0.57019 0.63602   2
  -3 -14  -8 3.27971 0.66313   2
   3 -14  -8 3.59801 0.66418   2
  -3 -14  -9 1.01941 0.62361   2
   3 -14  -9 1.94023 0.63921   2
   3 -14 -10 0.54588 0.62152   2
  -3 -14 -10 0.95879 0.60164   2
   3 -14 -11 3.13468 0.67191   2
  -3 -14 -11 3.53663 0.68431   2
   3 -14 -12 11.0245 0.86571   2
  -3 -14 -12 9.13958 0.85124   2
   3 -14 -13 18.8855 1.26819   2
  -3 -14 -13 19.6812 1.22964   2
  -3 -14 -14 0.18724 0.64397   2
   3 -14 -14 1.01697 0.65771   2
  -3 -14 -15 8.45937 0.84635   2
   3 -14 -15 8.72027 0.84251   2
  -3 -14 -16 13.3288 1.00424   2
   3 -14 -16 13.3856 1.00391   2
   3 -14 -17 3.07129 0.75810   2
  -3 -14 -17 3.46318 0.74133   2
   3 -14 -18 0.51725 0.70091   2
  -3 -14 -18-0.73814 0.68303   2
   3 -14 -19 1.22817 0.70075   2
  -3 -14 -19-0.89410 0.66883   2
  -3 -14 -20 1.53318 0.72252   2
   3 -14 -20-0.16021 0.71228   2
   3 -14 -21 1.58468 0.76681   2
  -3 -14 -21 1.16470 0.73155   2
   3 -14 -22 0.59193 0.73861   2
  -3 -14 -22 1.89926 0.76733   2
  -3 -14 -23 1.12220 0.76946   2
   3 -14 -23 1.79979 0.76817   2
   3 -14 -24 2.00230 0.82051   2
  -3 -14 -24 3.68306 0.78758   2
  -3 -14 -25 0.55638 0.79928   2
   3 -14 -25-0.32721 0.81319   2
   3 -14 -26-0.08336 0.81545   2
  -3 -14 -26 0.39683 0.84136   2
  -3 -14 -27-1.27597 0.86325   2
   3 -14 -27 0.74217 0.85321   2
   3 -14 -28 0.71566 0.83797   2
   3 -15   0 2.49789 0.84327   2
  -3 -15   0 0.61398 0.81697   2
  -3 -15  -1 0.50502 0.76532   2
   3 -15   1 0.51610 0.89729   2
   3 -15  -1 1.75161 0.78978   2
  -3 -15   1 0.46844 0.87789   2
  -3 -15   2-0.24861 0.97116   2
  -3 -15  -2 0.25262 0.72745   2
   3 -15  -2 0.44056 0.73493   2
   3 -15   2 1.42921 0.95738   2
   3 -15   3 0.62231 1.04828   2
  -3 -15  -3 0.74774 0.69899   2
   3 -15  -3 0.99203 0.69850   2
  -3 -15   3 0.71583 1.00276   2
   3 -15   4 1.30423 1.07829   2
  -3 -15  -4-0.25335 0.65237   2
   3 -15  -4 0.03435 0.67968   2
  -3 -15   4 1.01466 1.06096   2
   3 -15  -5 2.81166 0.71286   2
  -3 -15  -5 2.31944 0.67820   2
  -3 -15  -6 0.18277 0.62846   2
   3 -15  -6-0.82635 0.69863   2
  -3 -15  -7 1.13698 0.63623   2
   3 -15  -7 0.46147 0.70523   2
   3 -15  -8 1.12663 0.63354   2
  -3 -15  -8 0.13411 0.64300   2
   3 -15  -9 17.0011 1.15591   2
  -3 -15  -9 17.7467 1.15860   2
  -3 -15 -10 1.57791 0.65199   2
   3 -15 -10 1.80924 0.68656   2
   3 -15 -11 12.0855 0.99920   2
  -3 -15 -11 12.0601 0.95872   2
   3 -15 -12 10.5527 0.90292   2
  -3 -15 -12 9.58799 0.88285   2
  -3 -15 -13 4.27241 0.76363   2
   3 -15 -13 4.53157 0.72544   2
   3 -15 -14 13.3280 1.03234   2
  -3 -15 -14 10.3395 1.01947   2
  -3 -15 -15 2.59563 0.69796   2
   3 -15 -15 3.34617 0.71879   2
   3 -15 -16 0.31846 0.71276   2
  -3 -15 -16 0.62221 0.70666   2
   3 -15 -17 1.00077 0.72515   2
  -3 -15 -17 0.98095 0.71207   2
  -3 -15 -18 1.97884 0.74137   2
   3 -15 -18 2.60430 0.74160   2
   3 -15 -19 15.3541 1.13091   2
  -3 -15 -19 14.1249 1.11513   2
   3 -15 -20 4.77289 0.79241   2
  -3 -15 -20 5.04128 0.81060   2
   3 -15 -21-1.17889 0.76598   2
  -3 -15 -21 0.17536 0.79789   2
   3 -15 -22 0.98398 0.74745   2
  -3 -15 -22-1.09647 0.75153   2
  -3 -15 -23 0.63301 0.76732   2
   3 -15 -23-0.58171 0.82136   2
   3 -15 -24 2.56126 0.81646   2
  -3 -15 -24 2.30369 0.81007   2
  -3 -15 -25 0.42810 0.83369   2
   3 -15 -25 0.31987 0.79814   2
   3 -15 -26 0.01444 0.81668   2
  -3 -15 -26 1.79416 0.84567   2
   3 -15 -27 0.78198 0.84655   2
  -3 -15 -27 1.29271 0.88043   2
  -3 -16   0 5.08325 0.87541   2
   3 -16   0 5.31410 0.92613   2
  -3 -16  -1 2.76433 0.83113   2
   3 -16   1 4.73807 0.94071   2
   3 -16  -1 4.20680 0.84362   2
  -3 -16   1 2.27604 0.96248   2
  -3 -16   2-0.06841 0.93629   2
   3 -16  -2 1.25120 0.78157   2
   3 -16   2 0.64095 0.98262   2
  -3 -16  -2-0.18682 0.73756   2
  -3 -16   3 0.09135 1.01941   2
   3 -16  -3-0.21425 0.73545   2
  -3 -16  -3-0.76744 0.70039   2
   3 -16   3 1.24809 1.01302   2
   3 -16   4 0.03901 1.07071   2
  -3 -16  -4-0.98082 0.71609   2
  -3 -16   4-0.89168 1.05876   2
   3 -16  -4 0.42699 0.71025   2
   3 -16   5 2.95892 1.15733   2
  -3 -16   5-1.34481 1.18321   2
  -3 -16  -5 0.26019 0.67900   2
   3 -16  -5 1.42819 0.71481   2
   3 -16  -6 6.71853 0.83405   2
  -3 -16  -6 6.57175 0.83041   2
  -3 -16  -7 0.85565 0.69207   2
   3 -16  -7 0.35837 0.68915   2
   3 -16  -8 0.57625 0.72224   2
  -3 -16  -8 0.52252 0.70390   2
  -3 -16  -9 0.35960 0.66924   2
   3 -16  -9 1.45757 0.72839   2
   3 -16 -10 1.64678 0.72062   2
  -3 -16 -10 1.07976 0.65640   2
  -3 -16 -11 0.97894 0.70697   2
   3 -16 -11 0.59168 0.69575   2
  -3 -16 -12 12.5864 1.02344   2
   3 -16 -12 13.9116 1.03635   2
   3 -16 -13 9.57500 0.90729   2
  -3 -16 -13 9.23128 0.86930   2
  -3 -16 -14 1.72205 0.74502   2
   3 -16 -14 0.08669 0.75589   2
  -3 -16 -15 5.90903 0.81431   2
   3 -16 -15 4.61652 0.78110   2
  -3 -16 -16 1.27752 0.77241   2
   3 -16 -16 2.88309 0.75978   2
  -3 -16 -17 0.07680 0.73129   2
   3 -16 -17-0.22668 0.77028   2
   3 -16 -18 1.69782 0.80471   2
  -3 -16 -18 2.75816 0.76803   2
  -3 -16 -19 0.95747 0.72845   2
   3 -16 -19 1.37987 0.76372   2
   3 -16 -20 0.49600 0.76550   2
  -3 -16 -20 0.82326 0.76201   2
  -3 -16 -21-0.04151 0.78906   2
   3 -16 -21 0.05440 0.78113   2
   3 -16 -22-0.08541 0.86857   2
  -3 -16 -22-2.46397 0.85316   2
  -3 -16 -23 1.25395 0.80147   2
   3 -16 -23 0.17796 0.81914   2
  -3 -16 -24 2.81048 0.84384   2
   3 -16 -24 0.82513 0.82035   2
  -3 -16 -25 1.95567 0.87053   2
   3 -16 -25-0.70787 0.82969   2
  -3 -16 -26 0.67367 0.88910   2
   3 -16 -26 0.86047 0.85947   2
  -3 -17   0 11.3920 1.15294   2
   3 -17   0 13.4803 1.19139   2
  -3 -17  -1 7.08164 0.90848   2
  -3 -17   1 4.68281 1.01196   2
   3 -17  -1 8.75839 0.94988   2
   3 -17   1 6.47783 1.04824   2
   3 -17  -2-0.28050 0.80589   2
  -3 -17   2-0.08978 1.00015   2
  -3 -17  -2 0.59004 0.81901   2
   3 -17   2-0.18021 1.02131   2
   3 -17  -3 2.78631 0.81433   2
  -3 -17   3 1.82677 1.06874   2
   3 -17   3 0.52994 1.06050   2
  -3 -17  -3 0.96261 0.79857   2
   3 -17   4-0.16027 1.10918   2
   3 -17  -4 1.58743 0.78877   2
  -3 -17   4 1.96983 1.11715   2
  -3 -17  -4 1.64514 0.71731   2
  -3 -17   5 4.70454 1.22278   2
   3 -17   5 2.18910 1.21618   2
   3 -17  -5 3.51365 0.76468   2
  -3 -17  -5 1.60180 0.74679   2
   3 -17  -6 4.44596 0.80845   2
  -3 -17  -6 1.79755 0.75781   2
  -3 -17   6 1.06335 1.18141   2
   3 -17   6 1.38594 1.23389   2
  -3 -17  -7 1.46548 0.73462   2
   3 -17  -7 0.64978 0.76241   2
  -3 -17  -8 3.90122 0.77539   2
   3 -17  -8 4.36291 0.77090   2
  -3 -17  -9 5.42632 0.78945   2
   3 -17  -9 4.98472 0.82707   2
   3 -17 -10 0.41395 0.73302   2
  -3 -17 -10 0.91044 0.68829   2
  -3 -17 -11 3.46997 0.74635   2
   3 -17 -11 2.08854 0.80189   2
   3 -17 -12 1.67312 0.81480   2
  -3 -17 -12 0.56904 0.75216   2
  -3 -17 -13 0.94155 0.71992   2
   3 -17 -13 0.92938 0.72722   2
  -3 -17 -14-0.46654 0.72549   2
   3 -17 -14-0.28110 0.75896   2
  -3 -17 -15 4.05348 0.82710   2
   3 -17 -15 3.53162 0.82327   2
   3 -17 -16-0.02583 0.78632   2
  -3 -17 -16 0.83354 0.76665   2
  -3 -17 -17 1.12409 0.76743   2
   3 -17 -17 0.50062 0.75031   2
   3 -17 -18 0.92746 0.80792   2
  -3 -17 -18 1.42656 0.78568   2
   3 -17 -19 3.69477 0.83370   2
  -3 -17 -19 4.19696 0.82290   2
   3 -17 -20 0.17814 0.78109   2
  -3 -17 -20 1.28162 0.79559   2
   3 -17 -21 1.86071 0.81398   2
  -3 -17 -21 1.50855 0.81693   2
  -3 -17 -22 1.05232 0.84155   2
   3 -17 -22 0.94760 0.87527   2
   3 -17 -23 0.27487 0.82532   2
  -3 -17 -23-1.64755 0.81522   2
  -3 -17 -24 0.78433 0.87968   2
   3 -17 -24 0.72364 0.83348   2
  -3 -17 -25 2.32313 0.92049   2
   3 -17 -25 2.60211 0.87261   2
  -3 -18   0 3.52056 0.94376   2
   3 -18   0 4.03220 1.01106   2
   3 -18   1 3.31659 1.02607   2
   3 -18  -1 3.77444 0.91376   2
  -3 -18  -1 4.86178 0.93930   2
  -3 -18   1 2.72428 1.01890   2
   3 -18   2 1.28146 1.08858   2
   3 -18  -2 0.78116 0.88455   2
  -3 -18   2-0.36296 1.01129   2
  -3 -18  -2 0.75197 0.85306   2
  -3 -18   3 3.85925 1.06472   2
  -3 -18  -3 5.56488 0.88830   2
   3 -18  -3 4.07890 0.89128   2
   3 -18   3 3.08615 1.12073   2
   3 -18  -4 10.9874 1.00267   2
  -3 -18   4 9.46707 1.26440   2
  -3 -18  -4 8.02148 0.96932   2
   3 -18   4 7.80052 1.27701   2
  -3 -18   5 2.50466 1.20703   2
   3 -18  -5 1.79620 0.84851   2
  -3 -18  -5 2.31596 0.80189   2
   3 -18   5 2.05680 1.26738   2
   3 -18   6-1.56780 1.26920   2
   3 -18  -6 0.25795 0.81370   2
  -3 -18  -6-0.24388 0.79304   2
  -3 -18   6 1.02794 1.27178   2
   3 -18  -7 2.01787 0.81988   2
  -3 -18  -7 0.68496 0.77930   2
   3 -18   7-0.52440 1.31243   2
   3 -18  -8 1.43560 0.80984   2
  -3 -18  -8 1.95056 0.78768   2
  -3 -18  -9 8.97217 0.93551   2
   3 -18  -9 7.24649 0.91972   2
   3 -18 -10 0.70452 0.74648   2
  -3 -18 -10 0.38791 0.73854   2
   3 -18 -11 12.1199 1.03372   2
  -3 -18 -11 9.30278 0.97560   2
  -3 -18 -12 0.55772 0.82145   2
   3 -18 -12 1.72286 0.83909   2
   3 -18 -13 0.07795 0.73052   2
  -3 -18 -13 0.81542 0.73532   2
  -3 -18 -14 1.15384 0.77887   2
   3 -18 -14 1.53203 0.76928   2
   3 -18 -15-1.16132 0.87123   2
  -3 -18 -15-0.04357 0.80283   2
  -3 -18 -16 2.90923 0.80168   2
   3 -18 -16 2.32866 0.80059   2
  -3 -18 -17 3.24084 0.83327   2
   3 -18 -17 1.65932 0.80706   2
  -3 -18 -18 0.08528 0.79601   2
   3 -18 -18-0.21017 0.80434   2
   3 -18 -19 1.49075 0.84709   2
  -3 -18 -19 2.53626 0.86837   2
  -3 -18 -20 1.92835 0.84647   2
   3 -18 -20 2.08555 0.82610   2
   3 -18 -21-1.26911 0.84547   2
  -3 -18 -21 0.39539 0.80826   2
  -3 -18 -22 0.13539 0.87937   2
   3 -18 -22 0.54803 0.87259   2
  -3 -18 -23 1.01827 0.92203   2
   3 -18 -23 2.61565 0.95086   2
  -3 -19   0 2.87369 0.96111   2
   3 -19   0 2.16553 0.94529   2
   3 -19  -1 4.53349 0.94058   2
  -3 -19   1 3.50911 1.03116   2
   3 -19   1 3.61040 1.04683   2
  -3 -19  -1 2.41511 0.89536   2
   3 -19   2-0.65310 1.07635   2
  -3 -19   2-0.03713 0.98475   2
  -3 -19  -2-0.73270 0.81162   2
   3 -19  -2 0.12244 0.91756   2
   3 -19   3 2.41057 1.14113   2
  -3 -19   3-0.48310 1.15756   2
   3 -19  -3 1.25122 0.88341   2
  -3 -19  -3 0.91334 0.85444   2
  -3 -19   4 1.16675 1.08945   2
   3 -19   4 0.86060 1.16929   2
  -3 -19  -4-0.61960 0.83134   2
   3 -19  -4 0.81934 0.80480   2
  -3 -19  -5 0.13078 0.81409   2
  -3 -19   5 1.42136 1.20063   2
   3 -19  -5-0.33318 0.83106   2
   3 -19   5-0.28960 1.27136   2
   3 -19   6 0.61215 1.30336   2
  -3 -19   6-1.05783 1.28788   2
   3 -19  -6-0.97968 0.83122   2
  -3 -19  -6-0.38516 0.80664   2
  -3 -19  -7 1.59638 0.82805   2
   3 -19  -7 5.92041 0.89017   2
   3 -19   7 3.58738 1.43643   2
  -3 -19   7 0.89748 1.34936   2
   3 -19  -8 0.30481 0.80748   2
  -3 -19  -8-0.86428 0.80776   2
   3 -19  -9 1.00455 0.79861   2
  -3 -19  -9-0.57620 0.78209   2
   3 -19 -10 0.56942 0.82642   2
  -3 -19 -10 1.05737 0.74113   2
   3 -19 -11 0.08321 0.79573   2
  -3 -19 -11-0.93754 0.78216   2
  -3 -19 -12 1.50269 0.85869   2
   3 -19 -12 1.47026 0.85600   2
   3 -19 -13 0.55453 0.79625   2
  -3 -19 -13 1.62516 0.78504   2
   3 -19 -14 0.97831 0.80112   2
  -3 -19 -14-1.00305 0.78228   2
  -3 -19 -15 3.36747 0.86492   2
   3 -19 -15 1.88271 0.87846   2
   3 -19 -16-0.11424 0.81777   2
  -3 -19 -16 0.26021 0.83904   2
   3 -19 -17-0.37248 0.84805   2
  -3 -19 -17 1.01574 0.81403   2
   3 -19 -18 0.33532 0.83628   2
  -3 -19 -18 1.10801 0.81084   2
   3 -19 -19 0.45447 0.93074   2
  -3 -19 -19 0.41303 0.91135   2
  -3 -19 -20-0.18296 0.89707   2
   3 -19 -20 1.56389 0.87288   2
   3 -19 -21 2.21745 0.87252   2
  -3 -19 -21 1.43828 0.88471   2
  -3 -19 -22 1.25191 0.84699   2
   3 -19 -22-0.12180 0.87320   2
   3 -20   0-0.82382 0.97053   2
  -3 -20   0-0.03423 0.96314   2
   3 -20  -1-0.61559 0.98074   2
  -3 -20  -1 0.52545 0.89466   2
   3 -20   1-0.25722 1.07675   2
  -3 -20   1-2.03254 0.99684   2
   3 -20  -2 1.15932 0.85949   2
  -3 -20  -2 1.94126 0.91450   2
  -3 -20   2-0.17151 1.07146   2
   3 -20   2 2.77709 1.07489   2
  -3 -20  -3-0.89849 0.87021   2
   3 -20  -3 0.46052 0.90327   2
   3 -20   3-1.79347 1.16205   2
  -3 -20   3-0.91092 1.09290   2
   3 -20  -4 0.37768 0.84919   2
  -3 -20   4-0.44996 1.16949   2
   3 -20   4 1.01443 1.22878   2
  -3 -20  -4 0.68051 0.85873   2
  -3 -20  -5 2.12572 0.84092   2
   3 -20   5-0.27396 1.33690   2
  -3 -20   5 2.36759 1.26142   2
   3 -20  -5 0.48461 0.87473   2
   3 -20  -6-0.43310 0.84700   2
   3 -20   6-1.67581 1.35293   2
  -3 -20  -6-0.73449 0.87385   2
  -3 -20   6 1.40067 1.29936   2
   3 -20  -7 2.89437 0.88307   2
  -3 -20  -7 1.31981 0.83119   2
  -3 -20   7 2.32027 1.30870   2
   3 -20   7 1.24757 1.42896   2
   3 -20  -8 1.10541 0.86867   2
   3 -20   8-1.03148 1.44790   2
  -3 -20   8 0.39211 1.38271   2
  -3 -20  -8-0.71640 0.85149   2
  -3 -20  -9-0.54475 0.80690   2
   3 -20  -9-0.52652 0.81159   2
  -3 -20 -10 2.34621 0.85988   2
   3 -20 -10 0.09944 0.84583   2
  -3 -20 -11 1.66805 0.81606   2
   3 -20 -11 0.85655 0.85043   2
   3 -20 -12 1.49203 0.84924   2
  -3 -20 -12 3.45202 0.88706   2
   3 -20 -13 0.08825 0.87244   2
  -3 -20 -13 2.16763 0.88003   2
   3 -20 -14-0.28622 0.81488   2
  -3 -20 -14-0.65913 0.80923   2
  -3 -20 -15 2.93147 0.89306   2
   3 -20 -15-0.44550 0.88512   2
   3 -20 -16 0.64721 0.85587   2
  -3 -20 -16 0.22830 0.82338   2
   3 -20 -17 0.69671 0.86153   2
  -3 -20 -17 0.99034 0.86052   2
  -3 -20 -18 0.64550 0.87545   2
   3 -20 -18-1.47689 0.88808   2
   3 -20 -19 1.42676 0.91555   2
  -3 -20 -19 1.33356 0.89741   2
  -3 -20 -20-0.22232 0.92096   2
   3 -20 -20 0.61111 0.90745   2
   3 -20 -21-1.18826 0.87988   2
  -3 -20 -21 0.38016 0.87594   2
   3 -21   0-0.05326 0.99144   2
  -3 -21   0 1.23834 0.97252   2
  -3 -21   1 1.00832 1.00451   2
   3 -21  -1 1.20197 0.97107   2
  -3 -21  -1 1.45510 0.93615   2
   3 -21   1 0.80251 1.05691   2
   3 -21  -2 0.49228 0.95231   2
   3 -21   2 0.73026 1.14816   2
  -3 -21   2 0.29170 1.09426   2
  -3 -21  -2 0.55416 0.91962   2
  -3 -21  -3 0.65062 0.86625   2
   3 -21   3-0.47732 1.21049   2
   3 -21  -3 0.87297 0.90706   2
  -3 -21   3-0.84488 1.15719   2
   3 -21   4 4.24571 1.27459   2
  -3 -21  -4 2.00062 0.89751   2
   3 -21  -4 2.92112 0.93616   2
  -3 -21   4 0.63969 1.21246   2
   3 -21   5 2.70701 1.34016   2
   3 -21  -5 2.60871 0.91935   2
  -3 -21  -5-0.28332 0.89505   2
  -3 -21   5-0.65845 1.24454   2
  -3 -21  -6-0.70602 0.85978   2
   3 -21   6 0.62675 1.37683   2
   3 -21  -6 1.31432 0.86888   2
  -3 -21   6 2.50557 1.29744   2
   3 -21   7-2.25262 1.39398   2
  -3 -21   7 0.50064 1.33119   2
  -3 -21  -7 0.07766 0.86119   2
   3 -21  -7-0.32513 0.87810   2
   3 -21  -8 2.18337 0.89334   2
   3 -21   8 0.93418 1.47608   2
  -3 -21  -8 1.11142 0.84696   2
  -3 -21   8-1.37220 1.44852   2
  -3 -21  -9 0.16931 0.84412   2
   3 -21  -9 0.07657 0.84200   2
   3 -21   9 0.47658 1.49601   2
  -3 -21   9-0.63669 1.45136   2
  -3 -21 -10 0.98620 0.87210   2
  -3 -21  10 1.86525 1.47629   2
   3 -21 -10-1.39635 0.87249   2
  -3 -21 -11 1.06886 0.86071   2
   3 -21 -11 0.66049 0.85063   2
   3 -21 -12-0.89673 0.91788   2
  -3 -21 -12-0.14270 0.88818   2
  -3 -21 -13 0.57229 0.85500   2
   3 -21 -13 0.50627 0.87616   2
  -3 -21 -14 0.13549 0.82775   2
   3 -21 -14-0.22370 0.83317   2
  -3 -21 -15 0.56194 0.85195   2
   3 -21 -15-0.30926 0.88794   2
   3 -21 -16 2.36860 0.92235   2
  -3 -21 -16 0.11315 0.87867   2
  -3 -21 -17 2.13081 0.88064   2
   3 -21 -17 3.11632 0.92344   2
   3 -21 -18 1.31479 0.89446   2
  -3 -21 -18 0.91071 0.89408   2
   3 -21 -19-1.58418 0.90785   2
  -3 -21 -19-0.82543 0.90825   2
   3 -22   0 5.55995 1.08703   2
  -3 -22   0 3.22197 1.04814   2
  -3 -22   1-0.62070 1.03639   2
   3 -22  -1-0.39838 0.96045   2
   3 -22   1 0.13242 1.04567   2
  -3 -22  -1-0.69028 0.93849   2
  -3 -22   2 2.71551 1.04502   2
   3 -22  -2 1.05275 0.94924   2
   3 -22   2 1.09734 1.15098   2
  -3 -22  -2 0.62665 0.93164   2
  -3 -22  -3 2.02203 0.94063   2
  -3 -22   3-0.47504 1.08923   2
   3 -22  -3 0.69718 0.92844   2
   3 -22   3 1.49831 1.18272   2
   3 -22  -4 0.81819 0.98017   2
  -3 -22  -4 0.65076 0.97284   2
   3 -22   4-0.65968 1.19445   2
  -3 -22   4 1.96234 1.17282   2
   3 -22  -5-0.47782 0.99118   2
  -3 -22  -5 2.20167 0.94146   2
  -3 -22   5 1.62196 1.29604   2
   3 -22   5 1.54260 1.32060   2
  -3 -22  -6-0.31065 0.91800   2
   3 -22  -6 0.96344 0.94312   2
  -3 -22   6 2.28960 1.30277   2
   3 -22   6-0.74042 1.41218   2
  -3 -22   7 0.55976 1.37968   2
   3 -22   7-0.48893 1.38971   2
   3 -22  -7 0.65755 0.87825   2
  -3 -22  -7 0.51461 0.88241   2
   3 -22  -8 0.69737 0.87293   2
  -3 -22  -8-0.03181 0.89437   2
   3 -22   8 3.23446 1.42403   2
  -3 -22   8 1.24116 1.36499   2
  -3 -22   9 2.45234 1.48139   2
   3 -22  -9-0.03199 0.92557   2
  -3 -22  -9 2.34462 0.92836   2
   3 -22   9 0.87459 1.59195   2
  -3 -22  10 3.42477 1.61616   2
   3 -22  10 2.61162 1.61448   2
  -3 -22 -10 0.31171 0.88865   2
   3 -22 -10 1.89129 0.89847   2
   3 -22 -11 0.09392 0.88879   2
  -3 -22 -11 0.34648 0.87394   2
   3 -22  11-1.33536 1.61330   2
  -3 -22  11 1.49557 1.55601   2
  -3 -22 -12-0.01650 0.92481   2
   3 -22 -12-0.01622 0.95168   2
   3 -22 -13-1.13435 0.93931   2
  -3 -22 -13 1.67284 0.91258   2
  -3 -22 -14 0.42031 0.87248   2
   3 -22 -14 1.86915 0.89543   2
   3 -22 -15 1.56361 0.92810   2
  -3 -22 -15-0.11262 0.89815   2
   3 -22 -16-0.53158 1.03677   2
  -3 -22 -16-0.36331 1.00435   2
   3 -22 -17 2.27475 0.91002   2
  -3 -22 -17-0.78168 0.88346   2
  -3 -23   0 0.76688 0.98546   2
   3 -23   0 0.31962 1.07754   2
   3 -23   1-1.61664 1.09355   2
  -3 -23   1 0.42612 1.02632   2
  -3 -23  -1-1.33928 0.98013   2
   3 -23  -1 0.68498 1.02204   2
  -3 -23   2 0.74457 1.06253   2
  -3 -23  -2-0.06963 0.94590   2
   3 -23  -2-0.45792 1.03618   2
   3 -23   2 1.23624 1.10829   2
  -3 -23  -3 0.36189 0.96654   2
   3 -23  -3-0.55437 1.04133   2
   3 -23   3 1.83252 1.23102   2
  -3 -23   3 2.13876 1.19164   2
  -3 -23   4 1.58507 1.20177   2
   3 -23  -4 0.38487 1.02150   2
  -3 -23  -4-1.07620 0.99979   2
   3 -23   4-0.29452 1.28291   2
   3 -23   5-0.28454 1.27385   2
   3 -23  -5 0.12031 0.97437   2
  -3 -23  -5 1.29945 0.95362   2
  -3 -23   5 1.76083 1.28068   2
   3 -23  -6-2.06584 0.96747   2
   3 -23   6 1.96639 1.38142   2
  -3 -23  -6 0.83133 0.94763   2
  -3 -23   6 0.78940 1.33464   2
  -3 -23  -7 1.10439 0.91390   2
   3 -23  -7 0.50263 0.93446   2
   3 -23   7-0.77883 1.39516   2
  -3 -23   7-0.12837 1.36679   2
   3 -23   8 0.81275 1.43739   2
   3 -23  -8 0.03308 0.92585   2
  -3 -23   8-0.96390 1.37145   2
  -3 -23  -8 0.47887 0.91730   2
  -3 -23  -9-0.28334 0.91193   2
  -3 -23   9-0.02783 1.45727   2
   3 -23  -9 0.76441 0.98214   2
   3 -23  10 0.05961 1.60370   2
   3 -23 -10-0.74322 0.92078   2
  -3 -23  10-2.12302 1.53877   2
  -3 -23 -10-0.75596 0.88029   2
  -3 -23  11-1.48989 1.57197   2
   3 -23 -11 0.99426 0.95702   2
   3 -23  11 2.06597 1.69270   2
  -3 -23 -11 1.72081 0.89691   2
   3 -23  12 1.28416 1.71643   2
   3 -23 -12-0.64099 0.97455   2
  -3 -23 -12 0.18870 0.98568   2
  -3 -23  12 1.26454 1.66034   2
  -3 -23 -13 0.42380 0.93097   2
   3 -23 -13 0.77474 0.94539   2
  -3 -23 -14 0.85581 0.92026   2
   3 -23 -14 0.20853 0.93046   2
   3 -23 -15 0.76168 0.90212   2
  -3 -23 -15-1.08407 0.92479   2
   3 -24   0 1.66232 1.13203   2
  -3 -24   0-0.67613 1.02152   2
  -3 -24  -1-0.26024 1.05514   2
  -3 -24   1 0.37733 1.06238   2
   3 -24   1 0.09998 1.10825   2
   3 -24  -1-0.74688 1.03226   2
   3 -24  -2-0.95995 0.97731   2
  -3 -24   2 0.06168 1.12394   2
   3 -24   2-0.14502 1.13915   2
  -3 -24  -2-2.14657 1.02432   2
   3 -24   3 2.57111 1.21252   2
  -3 -24   3-0.31864 1.13955   2
  -3 -24  -3-0.90010 0.99424   2
   3 -24  -3 0.27089 0.99328   2
   3 -24   4 0.88692 1.22169   2
  -3 -24  -4 0.91835 0.97455   2
  -3 -24   4-0.54067 1.24368   2
   3 -24  -4 0.68545 0.98085   2
  -3 -24   5-2.32379 1.25832   2
   3 -24  -5-0.46091 1.01259   2
   3 -24   5-0.59288 1.27535   2
  -3 -24  -5 0.12392 0.96343   2
   3 -24   6-0.55711 1.42349   2
   3 -24  -6 1.30966 0.99474   2
  -3 -24   6 1.57774 1.33239   2
  -3 -24  -6-0.31660 0.97202   2
   3 -24   7 0.95238 1.43950   2
   3 -24  -7 0.13939 0.99068   2
  -3 -24   7-1.56955 1.41033   2
  -3 -24  -7-0.66244 0.93666   2
   3 -24   8 0.70936 1.43752   2
   3 -24  -8-1.54499 0.99874   2
  -3 -24   8 0.51211 1.49517   2
  -3 -24  -8 0.29218 0.97210   2
  -3 -24  -9 1.33492 0.96645   2
   3 -24  -9 0.77859 0.97221   2
   3 -24   9-2.65189 1.50088   2
  -3 -24   9-0.59082 1.44420   2
   3 -24 -10 0.60009 0.95475   2
   3 -24  10 1.95904 1.58559   2
  -3 -24  10 0.26356 1.51825   2
  -3 -24 -10 0.85261 0.93831   2
  -3 -24  11 1.68423 1.65956   2
   3 -24 -11 1.50678 0.99996   2
  -3 -24 -11 0.17183 0.94243   2
   3 -24  11-1.24326 1.63810   2
   3 -24  12 2.60440 1.80103   2
  -3 -24  12 4.07066 1.73285   2
  -3 -24 -12-0.23133 0.95987   2
   3 -24 -12 1.45302 1.00110   2
   3 -25   0 2.80331 1.09931   2
  -3 -25   0 0.77463 1.07657   2
   3 -25  -1-1.31872 1.05062   2
  -3 -25   1-2.03312 1.13231   2
  -3 -25  -1 2.41361 1.06906   2
   3 -25   1-1.06501 1.12549   2
   3 -25  -2 1.53814 1.02328   2
  -3 -25   2 3.67039 1.15338   2
   3 -25   2 3.57222 1.19089   2
  -3 -25  -2 1.51219 1.00550   2
   3 -25   3 1.09429 1.17769   2
  -3 -25  -3-0.11303 1.02910   2
  -3 -25   3-0.84588 1.14079   2
   3 -25  -3 0.01889 1.05235   2
   3 -25   4 0.57144 1.27698   2
  -3 -25  -4 1.87264 1.01567   2
  -3 -25   4-0.09055 1.17289   2
   3 -25  -4-2.69623 1.09426   2
   3 -25   5 0.14349 1.35509   2
  -3 -25  -5-0.33136 0.99756   2
  -3 -25   5 0.61530 1.23464   2
   3 -25  -5 0.05534 1.01671   2
  -3 -25  -6-0.69012 0.99055   2
  -3 -25   6-1.78702 1.34874   2
   3 -25   6 1.78226 1.39515   2
   3 -25  -6-1.39295 1.08939   2
  -3 -25  -7 0.92165 1.04120   2
  -3 -25   7-1.72994 1.42980   2
   3 -25  -7 1.46454 1.01186   2
   3 -25   7-3.23536 1.38467   2
  -3 -25  -8-0.72891 0.97832   2
   3 -25  -8-0.01777 0.98047   2
   3 -25   8-1.22088 1.46415   2
  -3 -25   8-2.13753 1.45633   2
  -3 -25   9-0.31091 1.49929   2
   3 -25  -9 0.78844 0.98322   2
   3 -25   9 2.86504 1.54153   2
   4   0   0 189.914 10.1816   3
  -4   0   0 194.272 10.1970   3
  -4   0   0 199.348 10.1486   1
  -4   0   1-0.52489 0.64510   1
  -4   0  -1 0.07033 0.57460   1
   4   0  -1-1.52290 0.88339   3
   4   0   1-0.67306 0.90504   3
  -4   0   2 2.81377 0.66243   1
   4   0  -2 2.24293 0.45864   1
  -4   0  -2 1.82445 0.57136   1
   4   0  -2 2.10597 0.93029   3
   4   0   2 2.93040 0.45647   1
  -4   0   3-0.56444 0.65394   1
  -4   0  -3-0.05418 0.55197   1
   4   0  -3-0.05654 0.14183   2
   4   0   3 0.13045 0.39826   1
  -4   0   3-0.14194 0.15991   2
   4   0   3 0.01944 0.16503   2
   4   0  -3 1.30432 0.90107   3
   4   0  -3-0.12672 0.48080   1
   4   0  -4 226.992 11.5064   3
   4   0   4 221.177 11.4332   2
  -4   0  -4 218.655 11.4328   2
  -4   0   4 212.663 11.4793   1
  -4   0   4 216.334 11.4332   2
  -4   0   4 188.005 11.4985   3
   4   0  -4 216.930 11.4723   1
   4   0  -4 229.928 11.4329   2
  -4   0  -4 227.836 11.4631   1
   4   0   4 228.093 11.4533   1
  -4   0  -5-0.47933 0.49000   1
   4   0   5-0.15293 0.90953   3
   4   0  -5 0.49961 0.86812   3
  -4   0  -5-0.00159 0.19277   2
   4   0  -5 0.50943 0.47867   1
   4   0   5-0.07848 0.33581   1
  -4   0   5 0.07553 0.21699   2
  -4   0   5-0.23535 0.80982   3
   4   0   5-0.11161 0.22105   2
   4   0  -5 0.12922 0.17820   2
  -4   0  -6 18.3305 0.93771   2
   4   0  -6 17.4806 0.94100   2
  -4   0   6 15.0826 1.23466   3
   4   0   6 17.1646 0.97804   1
  -4   0  -6 17.2426 1.03214   1
  -4   0   6 17.2296 0.94515   2
   4   0   6 16.7398 0.94468   2
   4   0  -6 19.9166 1.08633   1
   4   0  -6 16.6631 1.24471   3
   4   0   6 17.5903 1.30442   3
  -4   0   7 0.21188 0.71378   1
   4   0  -7-0.63139 0.54163   1
  -4   0  -7-0.58460 0.41989   1
  -4   0  -7 0.01593 0.22727   2
   4   0  -7 0.11121 0.22475   2
   4   0   7-0.08655 0.24085   2
   4   0   7-0.36566 0.26963   1
  -4   0   7-0.96081 0.82757   3
   4   0  -7 0.33407 0.78644   3
   4   0   7-1.75802 0.90432   3
  -4   0   7-0.03697 0.26174   2
  -4   0   8 77.4777 4.14491   2
   4   0  -8 79.6480 4.14371   2
  -4   0   8 83.5941 4.23461   1
   4   0  -8 83.7194 4.20205   1
  -4   0   8 77.0763 4.24686   3
   4   0  -8 78.6134 4.23261   3
   4   0   8 81.6946 4.26877   3
   4   0   8 80.6099 4.14686   1
   4   0   8 80.0273 4.14424   2
  -4   0  -8 82.1494 4.15829   1
  -4   0  -8 77.8991 4.14235   2
  -4   0  -9 0.04165 0.35685   1
   4   0   9 0.15739 0.29105   2
   4   0  -9 0.08134 0.25286   2
  -4   0  -9 0.13093 0.25314   2
   4   0  -9 1.09625 0.56281   1
  -4   0   9 0.08571 0.30188   2
   4   0   9 1.04782 0.89650   3
   4   0  10 13.7094 0.76814   2
  -4   0  10 12.3294 0.76594   2
   4   0 -10 12.8806 0.75279   2
  -4   0 -10 13.1011 0.78577   1
   4   0  10 14.4019 1.16222   3
   4   0 -10 12.1911 0.94282   1
  -4   0 -10 13.9172 0.75470   2
   4   0  11 0.26260 0.33445   2
   4   0  11 1.56238 0.88434   3
   4   0 -11 0.19226 0.29676   2
  -4   0  11 0.37575 0.33540   2
  -4   0 -11 0.02200 0.29218   2
   4   0 -11-0.24379 0.63560   1
  -4   0 -11 0.16975 0.32635   1
   4   0  12 114.828 6.11303   3
  -4   0 -12 116.666 6.03257   2
   4   0  12 117.546 6.03430   2
   4   0 -12 112.938 6.08328   1
   4   0 -12 121.939 6.03364   2
  -4   0  12 110.135 6.03254   2
   4   0  13-1.11827 0.82426   3
  -4   0  13-0.08462 0.35564   2
   4   0 -13-0.93401 0.34989   2
   4   0 -13 0.46992 0.60628   1
  -4   0 -13-0.17774 0.32491   2
   4   0  13-0.21729 0.33353   2
   4   0 -14 4.52722 0.43036   2
   4   0  14 4.05463 0.42238   2
  -4   0 -14 4.24213 0.42736   2
   4   0 -14 4.45039 0.71724   1
  -4   0  14 4.29452 0.43229   2
   4   0  14 4.21034 0.80919   3
   4   0 -15-0.45533 0.39005   2
  -4   0  15 0.00483 0.34633   2
   4   0 -15-0.28427 0.63284   1
   4   0  15 0.00468 0.36895   2
  -4   0 -15-0.27823 0.36405   2
   4   0  15-0.43452 0.75458   3
   4   0  16 71.5944 3.77550   2
   4   0 -16 71.6462 3.83974   1
   4   0  16 68.0994 3.84453   3
  -4   0  16 68.8151 3.77346   2
  -4   0 -16 72.6829 3.77996   2
   4   0 -16 77.9938 3.78212   2
  -4   0  17-0.15029 0.38613   2
   4   0  17-0.57308 0.73229   3
  -4   0 -17-0.02983 0.39522   2
   4   0  17-0.69139 0.38273   2
   4   0 -17-0.10749 0.68336   1
   4   0 -17-0.34719 0.39809   2
   4   0 -18 6.31581 0.54174   2
  -4   0 -18 6.58615 0.55667   2
   4   0 -18 7.27978 0.85231   1
  -4   0  18 7.17438 0.56206   2
   4   0  18 6.43962 0.55414   2
   4   0  18 5.92884 0.80358   3
   4   0  19-0.64728 0.70212   3
   4   0 -19 0.79471 0.76631   1
  -4   0 -19-0.43088 0.43976   2
   4   0 -19 0.41126 0.42188   2
   4   0 -20 0.31451 0.46642   2
   4   0 -20-0.17857 0.80336   1
  -4   0 -20 0.13132 0.43984   2
   4   0 -21-0.38688 0.50004   2
   4   0 -21 0.38764 0.85612   1
  -4   0 -21 0.25040 0.48168   2
   4   0 -22 1.62386 0.88751   1
  -4   0 -22 2.62554 0.56325   2
   4   0 -22 1.73747 0.56808   2
   4   0 -23 0.92612 0.56252   2
   4   0 -23 1.18405 0.89524   1
  -4   0 -23-0.44903 0.59040   2
   4   0 -24 0.04762 0.59592   2
   4   0 -24-1.38652 0.94826   1
  -4   0 -24 0.87468 0.63208   2
  -4   0 -25-0.04311 0.69503   2
   4   0 -25 0.34482 0.70457   2
   4   0 -26 0.84422 0.71372   2
  -4   0 -26 0.33490 0.67456   2
   4   0 -27 0.91567 0.66396   2
  -4   0 -27-0.20011 0.69139   2
   4   0 -28-0.16547 0.70024   2
  -4   0 -28 1.53246 0.69222   2
   4   0 -29-0.60673 0.68592   2
  -4   0 -29 0.78811 0.71385   2
   4   0 -30 0.20995 0.75030   2
  -4   0 -30 0.04815 0.76224   2
   4   0 -31 1.62284 0.75883   2
  -4   0 -31 0.19851 0.78359   2
  -4   0 -32-0.85696 0.79449   2
   4   0 -32 0.15045 0.80351   2
   4   0 -33 0.45971 0.79959   2
  -4   0 -33-0.90785 0.87974   2
   4  -1   0 45.9131 2.56506   3
   4   1   0 40.0706 2.57017   3
  -4  -1   0 47.7598 2.49515   1
  -4  -1   0 53.6463 2.65482   3
  -4   1  -1 2.34980 0.64198   1
   4   1   1 2.78426 0.90434   3
  -4  -1   1 3.23032 0.60828   1
   4   1  -1 1.03159 0.82077   3
  -4  -1  -1 2.75279 0.60984   1
  -4  -1  -1 1.28428 1.00617   3
   4  -1   1 0.07259 0.83392   3
   4  -1  -1 1.65063 0.73560   3
  -4   1   2 64.2077 3.26812   2
   4  -1   2 65.4075 3.26158   2
   4   1   2 67.8922 3.26878   2
   4  -1  -2 42.5380 3.34842   3
  -4  -1  -2 63.2259 3.44770   3
   4   1   2 56.5256 3.30135   1
   4   1  -2 54.2431 3.31419   1
   4  -1   2 71.7793 3.31912   1
   4  -1   2 46.4714 3.41926   3
   4  -1  -2 62.2704 3.26215   2
   4   1  -2 58.6971 3.41653   3
  -4   1  -2 63.8240 3.33774   1
   4  -1  -2 44.9651 3.32148   1
  -4  -1   2 57.1378 3.34563   1
  -4  -1  -2 62.9517 3.32890   1
  -4  -1   2 63.6454 3.26147   2
  -4  -1   3 20.7707 1.15022   2
   4  -1   3 22.5511 1.15063   2
   4   1  -3 17.0530 1.24992   1
   4   1  -3 19.9917 1.48200   3
  -4  -1   3 19.8664 1.32133   1
   4  -1  -3 22.8335 1.15169   2
   4   1   3 22.6318 1.15779   2
  -4  -1  -3 20.8929 1.48148   3
   4  -1   3 20.8348 1.23608   1
  -4   1   3 22.3342 1.15961   2
   4   1   3 22.5320 1.20956   1
   4  -1  -3 21.5180 1.26386   1
   4  -1  -3 20.4064 1.42197   3
  -4  -1  -3 23.4915 1.27774   1
   4   1  -4 39.6435 2.18881   1
  -4  -1   4 38.5760 2.34922   3
   4   1  -4 38.6653 2.28800   3
  -4   1   4 40.9067 2.12273   2
   4  -1   4 41.3134 2.11622   2
  -4  -1  -4 40.3373 2.11659   2
   4  -1  -4 43.1803 2.20001   1
  -4  -1   4 38.4806 2.25564   1
   4  -1  -4 38.7446 2.30276   3
   4   1   4 41.7901 2.12228   2
  -4  -1  -4 41.2811 2.18901   1
   4  -1   4 40.0639 2.16373   1
   4   1   4 41.5833 2.15496   1
   4  -1  -4 42.3019 2.11717   2
  -4  -1  -4 30.5488 2.28903   3
  -4  -1   4 38.7583 2.11625   2
   4  -1  -5 0.10941 0.50973   1
   4   1   5 0.74861 0.35136   1
  -4  -1  -5 0.50383 0.20528   2
   4  -1  -5 0.32436 0.19339   2
   4  -1   5 0.50199 0.39337   1
  -4   1  -5 0.23601 0.20389   2
  -4   1   5 0.75198 0.25057   2
   4  -1   5 1.14801 0.94513   3
   4   1   5-0.52229 0.90887   3
   4   1  -5 0.22938 0.19061   2
   4   1   5 0.64510 0.24443   2
  -4  -1   5 0.54144 0.20625   2
  -4  -1  -5 0.20153 0.48488   1
   4   1  -5 0.11121 0.50886   1
   4  -1  -5-0.03145 0.84717   3
  -4  -1   5 0.08474 0.98305   3
  -4  -1  -5 0.18231 0.85514   3
   4  -1   5 0.49711 0.21292   2
   4   1  -5 0.15149 0.85436   3
   4   1   6 2.96005 0.37150   1
   4  -1  -6 2.61679 0.26689   2
   4  -1   6 3.27932 0.98371   3
   4   1  -6 2.88381 0.26646   2
  -4  -1  -6 2.62895 0.49801   1
  -4  -1  -6 2.18120 1.01104   3
   4  -1   6 2.68134 0.27402   2
   4  -1  -6 2.81808 0.89505   3
  -4  -1   6 2.59196 0.27667   2
  -4   1  -6 2.74264 0.25816   2
   4  -1  -6 2.47547 0.57356   1
  -4  -1  -6 2.74169 0.26776   2
  -4   1   6 2.48224 0.29232   2
   4   1   6 2.69817 0.29289   2
  -4  -1   6 3.42091 0.91217   3
   4   1   6 1.53517 0.86980   3
   4   1  -6 2.25615 0.53257   1
   4  -1   6 2.53555 0.38537   1
  -4   1   7 10.3062 0.64707   2
   4  -1   7 9.71435 1.08399   3
  -4  -1  -7 11.9180 0.73068   1
   4   1  -7 12.4381 0.63672   2
   4   1  -7 12.0630 0.77428   1
  -4   1  -7 10.9048 0.63158   2
   4   1   7 10.9303 1.07462   3
   4  -1  -7 10.7340 0.79291   1
   4   1   7 11.2040 0.64815   2
   4  -1   7 11.2841 0.63728   2
   4  -1  -7 10.2350 0.62765   2
  -4  -1   7 12.9409 0.90043   1
  -4  -1   7 10.7140 0.63950   2
  -4  -1   7 8.43546 1.07665   3
  -4  -1  -7 10.8481 0.63170   2
   4  -1  -7 9.55593 1.03249   3
   4  -1   7 11.0779 0.67544   1
   4  -1  -8 0.04672 0.59899   1
  -4  -1   8 0.59963 0.27711   2
   4  -1   8 0.53030 0.27281   2
   4  -1  -8 1.15112 0.26651   2
  -4  -1   8 1.53703 0.82882   3
   4  -1   8 1.16872 0.86461   3
  -4   1  -8 0.52764 0.30811   2
   4   1  -8-0.71516 0.54013   1
  -4  -1   8 0.88298 0.71104   1
  -4   1   8 1.08299 0.30992   2
   4   1   8 0.68428 0.29692   2
   4   1  -8 0.54742 0.28504   2
   4   1   8 0.85633 0.83508   3
   4  -1   8 0.16937 0.30539   1
  -4  -1  -8 0.78526 0.39947   1
   4  -1  -8-0.14775 0.83005   3
  -4  -1  -8 0.89846 0.26522   2
   4  -1  -9-0.25045 0.63058   1
   4  -1  -9 0.05761 0.27112   2
  -4  -1   9-0.03694 0.28008   2
   4  -1   9-0.32334 0.28188   1
  -4   1  -9 0.07780 0.28474   2
  -4  -1  -9 0.33979 0.38295   1
   4   1  -9-0.24933 0.28610   2
  -4   1   9 0.12120 0.30780   2
  -4  -1  -9-0.04051 0.27033   2
   4   1  -9-0.33135 0.58014   1
   4   1   9 0.24664 0.31177   2
   4   1   9 0.39779 0.83480   3
   4  -1   9-0.05249 0.28158   2
   4  -1   9-0.05754 0.82793   3
  -4  -1   9 0.69050 0.85577   3
  -4  -1   9 0.60698 0.76333   1
   4  -1  -9 0.87801 0.78317   3
  -4  -1 -10 48.9960 2.62348   2
   4   1 -10 50.2839 2.69835   1
   4  -1  10 49.7573 2.62518   2
   4   1  10 52.7915 2.76668   3
  -4   1 -10 51.8879 2.62654   2
   4   1  10 51.7842 2.62959   2
   4   1 -10 52.5261 2.62735   2
  -4  -1 -10 52.1245 2.63355   1
   4  -1  10 42.3283 2.74096   3
  -4   1  10 47.5583 2.62852   2
  -4  -1  10 53.1364 2.74976   1
   4  -1 -10 50.4908 2.72879   1
  -4  -1  10 47.9471 2.62397   2
   4  -1 -10 50.5168 2.62558   2
   4  -1 -10 49.9520 2.75148   3
  -4  -1  10 43.5953 2.75931   3
  -4  -1 -11 18.4406 0.94706   2
   4  -1  11 12.2608 1.12475   3
  -4  -1  11 13.6437 1.20022   3
   4   1  11 17.9418 0.96521   2
  -4   1  11 17.3160 0.96736   2
  -4   1 -11 16.3851 0.95205   2
   4  -1  11 15.8042 0.95447   2
   4   1 -11 17.0440 1.09288   1
   4  -1 -11 17.1706 0.94955   2
   4   1 -11 17.8793 0.94592   2
   4   1  11 17.4824 1.23802   3
  -4  -1 -11 18.1500 0.96540   1
  -4  -1  11 14.6179 0.94743   2
   4  -1 -11 19.5770 1.18282   3
  -4  -1  11 16.9996 1.20737   1
   4  -1 -11 18.7416 1.18060   1
  -4  -1 -12 51.5843 2.72231   1
   4   1 -12 54.7771 2.73217   2
   4   1  12 51.5412 2.73436   2
   4  -1  12 50.6038 2.73101   2
  -4   1  12 50.6862 2.73519   2
  -4   1 -12 52.2273 2.73195   2
  -4  -1  12 56.9414 2.84836   1
   4  -1 -12 55.6061 2.84759   1
   4  -1 -12 55.3709 2.73377   2
   4  -1  12 45.0077 2.83957   3
   4   1 -12 51.0620 2.80343   1
   4   1  12 51.8486 2.84972   3
  -4  -1 -12 53.7030 2.73496   2
  -4  -1  12 46.3561 2.82591   3
  -4  -1  12 49.7098 2.73121   2
  -4  -1  13 0.65724 0.59195   3
   4   1  13 2.23491 0.79664   3
   4  -1  13 1.12270 0.78670   3
  -4   1 -13 0.74921 0.35151   2
   4  -1  13 1.14557 0.36587   2
   4  -1 -13 0.47326 0.63110   1
   4   1 -13 0.97207 0.36300   2
  -4  -1 -13 0.80356 0.30828   1
  -4   1  13 0.73996 0.36637   2
  -4  -1  13 0.64977 0.34923   2
   4  -1 -13 0.70967 0.34723   2
   4   1  13 0.82273 0.35902   2
  -4  -1 -13 0.62331 0.35960   2
   4   1 -13 0.78625 0.64479   1
   4   1  14 1.32598 0.73124   3
  -4  -1  14 2.14971 0.37391   2
  -4  -1 -14 1.34618 0.28856   1
   4   1 -14 1.52632 0.63491   1
   4  -1 -14 2.88138 0.65845   1
   4   1 -14 2.19880 0.34067   2
  -4   1 -14 2.16092 0.37152   2
  -4  -1  14 1.65024 0.65887   3
   4  -1 -14 2.21045 0.35776   2
   4   1  14 1.68927 0.38036   2
   4  -1  14 1.09047 0.36905   2
   4  -1  14 1.16542 0.81120   3
  -4  -1 -14 1.75321 0.38001   2
  -4   1  14 2.32781 0.38257   2
   4  -1  15 0.09001 0.35288   2
   4   1 -15 1.17585 0.62824   1
  -4   1  15 0.17186 0.37495   2
  -4  -1  15-0.13166 0.36962   2
  -4  -1 -15 0.42500 0.35408   2
   4   1 -15 0.16843 0.35884   2
   4  -1  15 0.80596 0.80453   3
   4  -1 -15 0.13736 0.36025   2
   4  -1 -15-0.28555 0.62509   1
  -4   1 -15 0.37487 0.37322   2
   4   1  15-1.32249 0.72629   3
   4   1  15-0.39685 0.37474   2
   4  -1 -16 1.26086 0.40113   2
   4  -1  16 0.13291 0.79379   3
   4   1 -16 1.54269 0.39391   2
  -4   1 -16 1.55947 0.41168   2
   4   1  16 0.98560 0.74072   3
   4  -1 -16 1.81918 0.64664   1
  -4  -1 -16 1.28339 0.39451   2
   4   1  16 0.87133 0.39272   2
  -4  -1  16 1.21716 0.37341   2
  -4   1  16 0.99637 0.39438   2
   4  -1  16 1.45847 0.38515   2
   4   1 -16 0.90579 0.65638   1
   4  -1 -17 0.47520 0.40789   2
  -4   1  17 0.85924 0.40603   2
  -4  -1 -17-0.07352 0.41211   2
   4   1 -17 0.10324 0.41877   2
  -4   1 -17 0.15612 0.43372   2
   4  -1 -17-0.52746 0.69638   1
  -4  -1  17 1.09199 0.38954   2
   4  -1  17-2.09778 0.81582   3
   4   1  17 0.52099 0.43682   2
   4   1 -17 1.39254 0.70611   1
   4  -1  17 0.27719 0.40704   2
  -4  -1  18 7.60189 0.57888   2
  -4   1 -18 8.55286 0.63951   2
   4   1 -18 7.98263 0.60695   2
   4   1 -18 7.27890 0.82598   1
  -4  -1 -18 7.68710 0.60318   2
   4  -1 -18 6.80947 0.56226   2
   4  -1  18 6.41821 0.87694   3
   4  -1 -18 6.73048 0.86748   1
  -4   1  18 7.33865 0.61001   2
   4   1  18 6.86421 0.61239   2
   4  -1  18 6.67173 0.58156   2
  -4  -1 -19-0.12365 0.41938   2
   4  -1 -19 1.22787 0.74467   1
   4  -1  19-0.26571 0.76669   3
   4   1 -19-0.12753 0.72468   1
  -4   1 -19 0.73307 0.50490   2
   4  -1 -19 0.49931 0.44160   2
   4   1 -19 0.25453 0.50156   2
  -4   1 -20 2.01692 0.57928   2
   4  -1 -20 1.54221 0.81123   1
   4   1 -20 1.97398 0.55106   2
   4  -1 -20 1.44845 0.47186   2
  -4  -1 -20 1.62588 0.49415   2
   4   1 -20 2.06468 0.78987   1
   4  -1  20 0.91957 0.77711   3
  -4   1 -21 0.49684 0.56801   2
   4  -1 -21 1.75100 0.85794   1
   4  -1 -21 1.36683 0.49414   2
  -4  -1 -21 1.08377 0.52020   2
   4  -1  21 0.28330 0.76535   3
   4   1 -21 2.07695 0.54162   2
   4   1 -21-0.06036 0.79384   1
   4  -1 -22 5.47925 0.93255   1
   4  -1 -22 3.66833 0.57764   2
  -4  -1 -22 2.47741 0.56081   2
   4  -1  22 3.53595 0.79327   3
   4   1 -22 3.97134 0.58228   2
  -4   1 -22 3.53617 0.61053   2
   4   1 -22 4.84821 0.85941   1
   4  -1 -23 0.58370 0.55081   2
   4  -1 -23-0.84000 0.91177   1
   4   1 -23 1.22171 0.88080   1
  -4   1 -23 0.39959 0.58044   2
  -4  -1 -23-0.05939 0.56827   2
   4   1 -23-0.21524 0.56299   2
   4   1 -24 0.51592 0.84331   1
  -4   1 -24 0.36747 0.58494   2
   4   1 -24 0.35641 0.57241   2
   4  -1 -24 0.04389 0.55974   2
  -4  -1 -24 0.31693 0.54801   2
   4  -1 -24 1.64102 0.94798   1
  -4  -1 -25-0.04875 0.59387   2
   4  -1 -25 2.09513 0.94683   1
  -4   1 -25 1.47492 0.61364   2
   4   1 -25-0.48276 0.61175   2
   4  -1 -25 0.83882 0.61092   2
   4   1 -26 0.21325 0.63107   2
   4  -1 -26 0.46495 0.61728   2
  -4  -1 -26 0.02042 0.64367   2
  -4   1 -26 0.98004 0.64249   2
   4   1 -27-0.89377 0.69403   2
  -4   1 -27 0.38348 0.64726   2
  -4  -1 -27 0.15433 0.64938   2
   4  -1 -28 3.03068 0.74826   2
   4   1 -28 0.84228 0.67183   2
  -4   1 -28 1.66137 0.67141   2
  -4  -1 -28 2.62465 0.76993   2
  -4  -1 -29 1.38141 0.87939   2
   4  -1 -29 0.24104 0.81334   2
   4   1 -29 0.05522 0.70334   2
  -4   1 -29 1.33286 0.72364   2
  -4   1 -30 1.04959 0.76719   2
   4  -1 -30 1.17806 0.76844   2
   4   1 -30 0.67079 0.75039   2
  -4  -1 -30 1.13830 0.79427   2
   4   1 -31-0.36110 0.80171   2
   4  -1 -31-0.30338 0.77707   2
  -4  -1 -31-0.15648 0.80320   2
  -4   1 -31-0.20551 0.77384   2
  -4   1 -32-0.82461 0.85746   2
  -4  -1 -32-1.21752 0.79367   2
   4  -1 -32-0.47467 0.79463   2
   4   1 -32-0.73502 0.83361   2
  -4  -1 -33 2.03998 0.86438   2
   4  -1 -33 0.35832 0.84210   2
   4   1 -33-0.68058 0.85867   2
  -4   1 -33-0.41122 0.89220   2
  -4  -2   0 416.689 21.0528   1
  -4  -2   0 375.193 21.0897   3
   4  -2   0 408.502 21.0229   2
   4   2   1 0.37083 0.43387   2
   4  -2  -1-0.05977 0.17869   2
  -4  -2  -1 0.15869 0.56805   1
   4  -2   1 0.39868 0.43691   1
  -4  -2   1-0.28050 0.60168   1
   4   2   1 0.61208 0.86046   3
  -4  -2  -1-0.82468 0.99635   3
   4   2   2 24.0266 1.20860   2
   4  -2   2 23.4649 1.28753   1
  -4   2   2 22.1676 1.21004   2
  -4  -2  -2 24.4891 1.56105   3
  -4  -2  -2 22.5871 1.30865   1
   4   2   2 21.3482 1.25197   1
   4  -2  -2 22.5402 1.18161   2
   4   2  -2 22.5148 1.27788   1
  -4  -2   2 22.9202 1.34456   1
   4  -2  -2 17.2785 1.29234   1
  -4   2   3 9.26798 0.59862   2
  -4  -2   3 9.01941 0.80714   1
   4  -2   3 10.4417 0.55503   2
   4   2  -3 9.56743 0.69767   1
   4   2   3 10.2116 0.59357   2
   4  -2   3 8.81326 0.70837   1
   4  -2  -3 10.8261 0.56116   2
  -4  -2  -3 10.2420 0.56226   2
  -4  -2   3 9.72755 0.55549   2
   4  -2  -3 7.53400 0.75225   1
   4   2   3 9.54811 0.65964   1
  -4  -2  -3 8.56752 1.12135   3
  -4  -2  -3 9.12882 0.78315   1
   4   2  -4 1.54696 0.47802   1
   4  -2  -4 0.65180 0.56801   1
  -4  -2  -4 1.37931 0.97488   3
   4   2   4 1.30934 0.28728   2
   4  -2   4 1.22341 0.43872   1
  -4   2   4 0.73239 0.27813   2
  -4  -2   4 1.48307 0.23998   2
   4  -2   4 1.96762 0.26605   2
  -4  -2  -4 1.05456 0.52264   1
   4  -2  -4 0.82565 0.22124   2
  -4  -2   4 2.17247 0.86949   3
  -4  -2  -4 1.08663 0.22910   2
   4   2   5-0.19314 0.91037   3
   4  -2   5 0.77872 0.21816   2
   4  -2  -5 0.71090 0.53842   1
  -4  -2   5 0.51453 0.21978   2
   4  -2   5 0.89187 0.40783   1
  -4   2   5 0.34788 0.28227   2
   4   2   5 0.56927 0.27236   2
   4   2  -5-0.24530 0.44695   1
  -4  -2  -5 0.65626 0.48090   1
  -4  -2  -5 0.87198 0.22156   2
  -4  -2  -5 1.43622 0.97419   3
   4  -2  -5 0.45795 0.22760   2
  -4  -2   5 0.10097 0.89437   3
  -4  -2   6 17.8448 0.95612   2
  -4   2   6 16.6008 0.97479   2
  -4  -2  -6 18.1941 0.95832   2
  -4  -2  -6 17.8703 1.03785   1
   4   2   6 18.3710 0.98112   2
   4   2  -6 15.5506 1.09229   1
   4  -2  -6 18.0978 0.95944   2
   4  -2  -6 15.3252 1.08067   1
   4  -2   6 17.3177 1.01304   1
   4  -2  -6 15.9590 1.28079   3
  -4  -2  -6 15.5771 1.38070   3
  -4  -2   6 22.4192 1.29310   3
   4   2   6 17.6522 1.28365   3
   4  -2   6 18.0358 0.95494   2
  -4  -2   7 1.07976 0.64624   1
  -4  -2  -7-0.36063 0.24440   2
  -4  -2  -7-0.02921 0.95997   3
   4  -2  -7-0.12862 0.56999   1
   4  -2  -7 0.17194 0.26372   2
   4   2  -7-0.45595 0.49371   1
  -4  -2  -7 0.06696 0.43657   1
  -4  -2   7 0.42045 0.83687   3
   4   2   7-0.01109 0.30297   2
   4  -2  -7-0.53762 0.66836   3
  -4   2   7 0.19309 0.31054   2
   4  -2   7 0.43205 0.26593   2
   4  -2   7 0.23950 0.35808   1
  -4  -2   7-0.06608 0.26273   2
   4   2   7 0.29341 0.85819   3
   4  -2  -8 32.5107 1.94774   1
   4   2   8 34.6488 2.04749   3
  -4   2  -8 35.1027 1.83973   2
  -4  -2   8 33.5188 1.84198   2
   4  -2   8 35.7286 1.84412   2
  -4  -2   8 39.0952 1.98827   1
  -4  -2   8 35.3205 2.04915   3
   4   2   8 36.4932 1.85753   2
   4  -2  -8 28.7266 1.99230   3
  -4  -2  -8 34.3983 1.87073   1
   4   2  -8 32.1757 1.92833   1
   4  -2   8 36.3679 1.85383   1
  -4  -2  -8 34.1675 1.84067   2
   4   2  -8 35.9658 1.84217   2
   4  -2  -8 35.6722 1.84311   2
  -4  -2  -8 32.5705 2.07380   3
  -4   2   8 34.7356 1.85557   2
  -4  -2   9 19.9780 1.17610   2
  -4  -2  -9 19.2033 1.41940   3
   4  -2  -9 23.2627 1.42699   3
  -4  -2  -9 23.0620 1.18351   2
  -4  -2   9 22.1229 1.42556   3
   4  -2   9 20.5555 1.17834   2
  -4   2   9 21.8285 1.19746   2
   4   2   9 23.6477 1.19757   2
   4  -2  -9 23.1176 1.18196   2
   4   2  -9 20.2484 1.29585   1
  -4  -2  -9 22.2161 1.22400   1
   4   2   9 22.3908 1.44014   3
   4   2  -9 22.8588 1.18228   2
   4  -2  -9 19.1242 1.29898   1
  -4  -2   9 23.1528 1.38901   1
  -4   2  -9 21.3329 1.18077   2
   4  -2   9 21.4240 1.18214   1
   4  -2 -10 0.71146 0.30614   2
  -4  -2 -10 0.97482 0.30033   2
   4  -2 -10 0.56415 0.65293   1
  -4  -2  10 0.83081 0.74020   1
  -4  -2 -10 1.19158 0.97461   3
   4  -2  10 1.00358 0.28046   1
  -4  -2  10 0.14504 0.81652   3
  -4   2  10 0.91782 0.36243   2
   4   2 -10 1.55313 0.54287   1
  -4  -2  10 0.80675 0.31287   2
   4   2 -10 1.04282 0.28426   2
  -4   2 -10 1.22672 0.31018   2
   4  -2  10 0.99060 0.32440   2
   4   2  10 0.45360 0.34902   2
  -4  -2 -10 0.50559 0.40886   1
   4  -2 -10 0.92428 0.83026   3
   4  -2 -11 1.16537 0.75207   3
   4  -2 -11 0.66074 0.33467   2
  -4  -2 -11 0.09451 0.32752   2
  -4  -2  11 1.44694 0.77134   1
   4  -2  11 1.64442 0.21208   1
  -4   2 -11 1.22126 0.33911   2
   4  -2  11 1.47273 0.34155   2
   4   2 -11 1.11947 0.30880   2
   4   2  11 0.14349 0.36203   2
   4   2 -11 0.86929 0.57842   1
  -4  -2  11 0.35247 0.82277   3
  -4   2  11 0.21721 0.35586   2
   4  -2 -11 0.39989 0.61345   1
  -4  -2 -11 0.88920 0.42005   1
  -4  -2  11 1.12859 0.34444   2
   4  -2 -12 198.890 10.7282   3
  -4   2 -12 206.904 10.6924   2
  -4  -2  12 196.258 10.6906   2
   4  -2  12 210.198 10.6918   2
  -4  -2  12 213.571 10.7416   3
   4   2 -12 208.623 10.6914   2
   4   2 -12 206.556 10.7307   1
  -4   2  12 197.735 10.6940   2
   4   2  12 202.975 10.6932   2
  -4  -2 -12 204.010 10.6877   1
  -4  -2  12 210.868 10.7430   1
   4  -2 -12 222.269 10.6968   2
  -4  -2 -12 211.616 10.6961   2
   4  -2 -12 201.671 10.7399   1
   4  -2 -13 0.75092 0.64210   3
  -4  -2  13-0.65253 0.76252   1
   4  -2 -13-0.95010 0.70125   1
   4  -2 -13 0.08848 0.36335   2
  -4  -2  13-0.21962 0.34589   2
   4   2 -13-0.01750 0.33701   2
   4   2 -13 0.33245 0.56487   1
  -4  -2 -13 0.03851 0.34483   2
  -4  -2 -13-0.48131 0.34317   1
   4  -2  13 0.12682 0.35275   2
  -4   2 -13 1.02958 0.34622   2
  -4  -2  13-0.96758 0.76607   3
  -4   2  13 0.22077 0.37345   2
   4   2  13 0.08445 0.36951   2
  -4  -2  14 0.24345 0.34596   2
  -4  -2 -14 0.26968 0.33584   1
   4  -2 -14 0.48827 0.34351   2
  -4  -2 -14 0.64295 0.36791   2
   4   2 -14 0.69140 0.57467   1
   4   2 -14 0.26526 0.35048   2
   4  -2  14 0.10840 0.78250   3
  -4   2 -14 0.24841 0.33653   2
   4   2  14 0.30416 0.38249   2
  -4   2  14 1.34195 0.37566   2
   4  -2 -14-0.02005 0.67948   1
  -4  -2  14-0.26385 0.76422   1
  -4  -2  14-1.00223 0.75947   3
   4  -2  14 0.58154 0.34066   2
  -4  -2  15 23.7354 1.26988   2
   4   2 -15 23.7236 1.38423   1
  -4  -2 -15 19.4909 1.24140   1
   4  -2 -15 24.4353 1.27686   2
  -4  -2  15 20.8910 1.42867   3
  -4  -2 -15 23.9445 1.27577   2
  -4   2  15 22.7422 1.28138   2
   4   2  15 22.8727 1.27580   2
  -4   2 -15 24.2091 1.28105   2
   4   2 -15 24.9437 1.27461   2
   4  -2  15 22.0658 1.46411   3
  -4  -2  15 23.7800 1.46173   1
   4  -2 -15 21.3354 1.41052   1
   4  -2  15 23.2965 1.27029   2
  -4  -2  16 31.3906 2.01953   3
  -4  -2 -16 31.9490 1.89785   1
   4  -2  16 27.5701 2.01086   3
  -4   2 -16 39.1229 1.93919   2
   4   2 -16 36.2369 2.02304   1
   4   2 -16 38.2686 1.93133   2
   4   2  16 35.8850 1.93704   2
   4  -2  16 35.6002 1.92798   2
   4  -2 -16 40.5259 1.93839   2
   4  -2 -16 38.6897 2.07087   1
  -4   2  16 37.2250 1.94029   2
  -4  -2  16 36.1956 1.92841   2
  -4  -2 -16 38.8240 1.93444   2
  -4  -2  17 2.83543 0.40682   2
   4  -2 -17 1.89381 0.40825   2
   4  -2  17 1.00323 0.74705   3
  -4  -2  17 2.39144 0.64178   3
   4   2 -17 2.90821 0.64475   1
  -4   2  17 1.69464 0.43374   2
   4  -2  17 2.20136 0.39602   2
   4   2 -17 1.82425 0.40839   2
  -4   2 -17 2.61433 0.43702   2
   4  -2 -17 2.55354 0.81693   1
   4   2  17 1.98805 0.43495   2
  -4  -2 -17 1.64271 0.42268   2
  -4  -2 -17 1.66103 0.30421   1
   4  -2  18 1.94836 0.41318   2
  -4  -2  18 1.68635 0.42456   2
  -4  -2 -18 1.97637 0.44542   2
   4  -2 -18 1.20884 0.42934   2
   4  -2 -18 0.67455 0.77612   1
  -4  -2  18 0.94427 0.58822   3
  -4   2 -18 2.12623 0.43972   2
   4   2  18 1.80045 0.43762   2
   4   2 -18 2.12066 0.44442   2
  -4   2  18 1.15089 0.43187   2
   4   2 -18-0.42145 0.69639   1
   4  -2  18 2.07790 0.81827   3
   4  -2 -19 0.14298 0.46201   2
  -4   2 -19-0.03428 0.44509   2
  -4  -2 -19-0.40588 0.46726   2
   4  -2 -19-0.64674 0.81366   1
   4   2 -19-0.15308 0.45160   2
   4   2 -19-0.58788 0.72251   1
   4   2 -20 1.23471 0.72851   1
   4  -2  20 1.18100 0.84450   3
   4  -2 -20 1.59582 0.84573   1
   4  -2 -20 1.32224 0.47900   2
   4   2 -20 1.70174 0.48714   2
  -4   2 -20 1.22279 0.47077   2
  -4  -2 -20 1.14455 0.50832   2
   4   2 -21 0.41821 0.83334   1
   4  -2 -21-0.13073 0.48618   2
  -4  -2 -21 0.18250 0.50421   2
   4  -2 -21-0.33964 0.88611   1
  -4   2 -21-0.65500 0.52402   2
   4   2 -21 1.13094 0.48389   2
   4  -2  21-1.88891 0.85461   3
   4  -2 -22-0.62753 0.50567   2
  -4  -2 -22 0.70590 0.53558   2
   4  -2  22 0.63835 0.83634   3
   4  -2 -22 1.24310 0.91011   1
   4   2 -22-0.00782 0.52834   2
  -4   2 -22 0.02418 0.51347   2
   4   2 -22-0.98886 1.03562   1
   4   2 -23 5.50961 0.92270   1
   4  -2 -23 4.29570 0.58603   2
  -4   2 -23 3.11395 0.63123   2
  -4  -2 -23 2.97065 0.62565   2
   4  -2  23 2.08204 0.84316   3
   4  -2 -23 5.52120 0.98432   1
   4   2 -23 4.90423 0.63530   2
   4   2 -24 0.56927 0.79436   1
   4  -2 -24 1.46552 0.59418   2
  -4  -2 -24 0.98001 0.59659   2
  -4   2 -24 1.22981 0.60963   2
   4  -2 -24 0.99446 0.96058   1
   4   2 -24 2.26498 0.59860   2
  -4  -2 -25 3.51607 0.61279   2
   4  -2 -25 1.61801 0.62777   2
   4   2 -25 2.39694 0.62992   2
  -4   2 -25 1.59120 0.64185   2
   4  -2 -25 3.53095 0.99084   1
   4   2 -26 1.00468 0.63643   2
  -4   2 -26 1.35826 0.66444   2
   4  -2 -26 0.17381 0.61546   2
  -4  -2 -26 2.13291 0.61721   2
   4  -2 -27 2.80359 0.66963   2
  -4  -2 -27 2.29538 0.66613   2
  -4   2 -27 2.58171 0.73428   2
   4   2 -27 3.39940 0.71948   2
   4  -2 -28 1.56076 0.70364   2
  -4  -2 -28 1.11814 0.69435   2
   4   2 -28 1.77948 0.69454   2
  -4   2 -28 0.96224 0.70774   2
   4  -2 -29 0.72149 0.71397   2
  -4  -2 -29 0.66159 0.73747   2
  -4   2 -29 0.79099 0.78486   2
   4   2 -29 0.89123 0.74179   2
   4  -2 -30-0.14772 0.77745   2
   4   2 -30 0.65630 0.77993   2
  -4   2 -30 0.71353 0.81347   2
  -4  -2 -30 1.81589 0.78316   2
   4  -2 -31-0.89049 0.86231   2
  -4  -2 -31-0.58846 0.85081   2
   4   2 -31 0.13243 0.77488   2
  -4   2 -31-0.01242 0.79284   2
   4  -2 -32 0.06121 0.96265   2
  -4  -2 -32 0.38333 0.91484   2
  -4  -2 -33 1.74755 0.92366   2
   4  -2 -33-0.91771 0.91498   2
   4  -3   0 10.2079 0.65654   2
  -4  -3   0 10.8628 0.66876   2
  -4  -3   0 11.0911 0.83003   1
  -4  -3   0 9.36174 1.13508   3
  -4  -3  -1 8.64282 1.13328   3
  -4  -3   1 8.64067 1.07871   3
   4  -3  -1 10.2996 0.58372   2
  -4  -3   1 8.13001 0.76296   1
  -4  -3  -1 10.0580 0.59625   2
  -4  -3  -1 9.89593 0.77870   1
   4   3   2 15.9248 0.94602   2
  -4  -3  -2 15.7545 0.87472   2
   4  -3  -2 17.4995 0.87175   2
  -4   3   2 15.4027 0.94990   2
   4   3  -2 11.5172 0.93292   1
  -4  -3  -2 17.9800 1.31640   3
  -4  -3  -2 15.8906 1.05197   1
  -4  -3   2 17.6857 1.04866   1
  -4   3   3 2.37490 0.38936   2
  -4  -3   3 2.92825 0.66769   1
  -4  -3  -3 2.29257 0.63031   1
   4  -3  -3 3.07167 0.28698   2
  -4  -3  -3 2.41666 0.28652   2
   4   3  -3 2.23434 0.38461   1
   4   3   3 2.67731 0.40095   2
  -4  -3  -3 1.17880 1.02481   3
   4   3  -4 0.75907 0.48019   1
  -4  -3  -4 1.28098 1.06689   3
   4  -3  -4 1.80399 0.25559   2
  -4  -3  -4 1.16483 0.50990   1
   4   3   4 1.92789 0.36208   2
  -4   3   4 1.64005 0.37617   2
  -4  -3   4 1.18993 0.91444   3
  -4  -3  -4 1.95178 0.27811   2
  -4  -3  -5 9.72511 0.60168   2
  -4  -3  -5 8.24790 0.66005   1
   4   3  -5 10.3195 0.77342   1
  -4  -3   5 10.3940 0.59635   2
   4   3   5 10.2982 0.64923   2
  -4  -3  -5 8.75724 1.13070   3
   4  -3   5 11.2749 0.59639   2
   4  -3  -5 11.1738 0.59903   2
  -4  -3   5 9.08410 1.12256   3
  -4   3   5 9.69892 0.64624   2
  -4  -3  -6 6.51650 1.04471   3
  -4   3   6 4.46598 0.45734   2
  -4  -3  -6 5.54246 0.56113   1
   4   3  -6 5.54070 0.69949   1
   4   3   6 5.41072 0.44832   2
   4  -3  -6 5.49044 0.39655   2
  -4  -3  -6 4.94256 0.40109   2
  -4  -3   6 5.36843 0.39396   2
  -4  -3   6 4.56155 0.91739   3
   4  -3   6 5.89719 0.39460   2
  -4  -3   7 5.01936 0.69636   1
   4  -3   7 4.91889 0.45781   1
  -4   3   7 3.88438 0.41112   2
  -4  -3  -7 3.65807 1.04364   3
  -4  -3  -7 4.33693 0.53287   1
  -4  -3   7 3.90304 0.35132   2
   4  -3   7 4.01736 0.35590   2
  -4  -3   7 4.00175 0.95342   3
   4   3  -7 3.82006 0.66279   1
   4  -3  -7 3.59864 0.35459   2
  -4  -3  -7 4.45390 0.34855   2
   4   3   7 3.66731 0.40264   2
  -4  -3   8 54.4290 2.69767   1
   4   3  -8 47.6473 2.66196   1
  -4  -3   8 46.5635 2.59264   2
  -4  -3  -8 51.4238 2.63140   1
  -4   3   8 47.2135 2.60587   2
   4  -3   8 47.7440 2.59122   2
   4   3   8 51.2953 2.60486   2
   4  -3  -8 52.0097 2.59524   2
   4  -3   8 47.4041 2.61146   1
  -4  -3   8 48.4307 2.75897   3
  -4  -3  -8 56.2137 2.81978   3
  -4  -3  -8 51.8183 2.59518   2
   4  -3   9 1.32872 0.37499   1
   4   3  -9 1.49459 0.58082   1
  -4  -3  -9 3.09799 0.49737   1
  -4  -3  -9 2.34315 0.32609   2
  -4  -3   9 1.01936 0.33038   2
   4   3   9 2.96556 0.40241   2
  -4  -3   9 1.26347 0.71244   1
  -4   3   9 2.78227 0.40798   2
   4  -3   9 1.71317 0.32852   2
  -4  -3  -9 2.83622 1.03986   3
   4  -3  -9 2.11131 0.32415   2
  -4  -3   9 2.69702 0.87615   3
   4  -3 -10 81.6773 4.20299   2
   4  -3  10 84.2992 4.20136   2
  -4  -3 -10 78.5547 4.34883   3
   4  -3  10 88.6728 4.20175   1
  -4  -3 -10 78.3794 4.21651   1
  -4   3  10 74.7983 4.20666   2
   4   3  10 75.4372 4.20574   2
  -4  -3  10 89.8073 4.30234   3
  -4  -3  10 81.7866 4.20107   2
   4  -3 -10 75.8320 4.28344   1
   4   3 -10 80.4081 4.24584   1
  -4  -3 -10 80.7382 4.20296   2
   4  -3 -10 64.5370 4.28099   3
  -4  -3  10 86.6494 4.28003   1
  -4  -3  11 205.712 11.0590   2
   4  -3  11 208.548 11.0479   1
   4  -3 -11 223.258 11.0640   2
   4  -3  11 216.620 11.0597   2
   4   3  11 213.862 11.0653   2
   4  -3 -11 180.295 11.0903   3
   4   3 -11 213.823 11.0958   1
  -4   3  11 207.215 11.0658   2
  -4  -3 -11 224.552 11.0648   2
   4  -3 -11 213.414 11.1204   1
  -4  -3  11 234.611 11.1159   1
  -4  -3 -11 213.164 11.1323   3
  -4  -3 -11 220.781 11.0641   1
  -4  -3  11 222.261 11.1146   3
   4  -3  12 40.5040 2.15647   2
   4  -3 -12 41.0460 2.28188   3
  -4  -3  12 42.2665 2.29552   1
   4   3 -12 39.0031 2.22354   1
  -4  -3  12 37.6222 2.15262   2
  -4  -3 -12 42.7115 2.16912   1
  -4   3  12 40.1554 2.16966   2
   4   3  12 42.7308 2.17109   2
  -4  -3 -12 35.4118 2.29041   3
   4  -3 -12 42.6575 2.27660   1
  -4  -3 -12 45.0958 2.16251   2
  -4  -3  12 41.0468 2.30001   3
   4  -3 -12 45.3485 2.16466   2
   4  -3  12 38.2501 2.12602   1
  -4  -3  13 1.03189 0.35301   2
  -4  -3 -13 1.39715 0.37098   2
   4   3  13 0.51329 0.38653   2
  -4  -3  13 1.90183 0.73937   1
   4  -3  13 1.54642 0.35602   2
   4  -3 -13 0.31745 0.71911   1
  -4  -3 -13 0.52536 0.42122   1
  -4  -3  13 1.32681 0.79271   3
   4  -3 -13 0.90948 0.34580   2
  -4   3  13 1.25413 0.40661   2
   4   3 -13 1.34328 0.33249   2
   4   3 -13 1.54615 0.63144   1
   4  -3 -13-0.14028 0.73982   3
  -4  -3 -13 0.59061 0.85713   3
   4   3 -14-0.31457 0.63893   1
   4  -3 -14 0.42318 0.62753   3
  -4  -3 -14 0.25921 0.36973   2
  -4   3 -14 0.33526 0.34821   2
   4  -3  14 0.71325 0.36431   2
   4   3 -14 0.03840 0.36050   2
  -4  -3  14 0.92348 0.36285   2
   4  -3 -14 0.73032 0.69197   1
  -4   3  14 0.49331 0.40012   2
   4   3  14 0.32453 0.38055   2
  -4  -3  14-0.20801 0.74136   3
   4  -3 -14-0.20101 0.36708   2
  -4  -3 -14 1.03601 0.39189   1
  -4  -3  14 0.12560 0.74969   1
   4  -3 -15 2.31141 0.41741   2
   4   3 -15 1.88023 0.38132   2
  -4   3 -15 2.22886 0.40247   2
  -4  -3 -15 1.75112 0.39388   1
   4   3 -15 1.18865 0.71929   1
  -4   3  15 1.84758 0.43017   2
   4   3  15 1.59028 0.41264   2
   4  -3 -15 0.77949 0.73706   1
  -4  -3  15 1.95682 0.39261   2
   4  -3  15 2.03083 0.38837   2
  -4  -3 -15 2.75679 0.42531   2
  -4  -3  15 0.59915 0.73899   3
  -4  -3  15 1.40035 0.79259   1
   4   3  16 15.6592 0.95352   2
   4   3 -16 16.1908 0.92936   2
  -4  -3 -16 14.8052 0.90784   1
   4  -3 -16 14.3016 1.12225   1
  -4  -3  16 15.6002 1.13129   3
   4   3 -16 17.7265 1.15968   1
  -4   3  16 14.5942 0.94098   2
  -4   3 -16 15.7988 0.93993   2
   4  -3  16 14.9624 0.92633   2
   4  -3 -16 15.9131 0.93164   2
  -4  -3  16 15.1627 1.16635   1
  -4  -3  16 15.5121 0.92570   2
  -4  -3 -16 17.3729 0.94691   2
  -4  -3 -17 6.78683 0.55404   2
  -4   3  17 7.02887 0.59258   2
   4   3 -17 6.66990 0.55897   2
   4   3 -17 7.01727 0.82514   1
  -4   3 -17 6.34596 0.56137   2
   4  -3 -17 6.30922 0.83288   1
  -4  -3 -17 5.35648 0.53101   1
   4   3  17 7.12777 0.58670   2
   4  -3 -17 7.27570 0.54132   2
  -4  -3  17 6.77350 0.88336   1
  -4  -3  17 6.10408 0.53040   2
   4  -3  17 6.53547 0.53365   2
  -4  -3  17 7.19881 0.81295   3
   4  -3  18 0.97501 0.41611   2
   4   3 -18 0.26799 0.69592   1
   4  -3 -18 0.30009 0.43537   2
  -4  -3  18 0.89563 0.74686   3
  -4  -3  18 0.25985 0.40909   2
  -4  -3 -18 0.17089 0.43657   2
   4   3 -18 1.67944 0.44210   2
  -4   3  18 0.46288 0.47216   2
   4  -3 -18 1.46042 0.83669   1
   4  -3  18 1.67637 0.83773   3
  -4  -3 -18 0.45674 0.33922   1
   4   3  18 0.14909 0.46404   2
  -4   3 -18 1.22048 0.43339   2
   4  -3  19-2.07628 0.80588   3
  -4  -3 -19-0.63052 0.44727   2
   4   3 -19 0.16561 0.70190   1
   4  -3 -19 0.37460 0.44684   2
  -4  -3 -19-0.23905 0.34868   1
   4  -3 -19 0.30344 0.81859   1
   4   3 -19-0.79009 0.47706   2
  -4   3 -19-0.32248 0.44120   2
  -4  -3  19-0.82796 0.75360   3
   4  -3  20 0.63142 0.78378   3
   4  -3 -20 4.75716 1.00188   1
   4  -3 -20 3.75618 0.52587   2
  -4  -3 -20 3.48997 0.52771   2
   4   3 -20 3.83354 0.53195   2
  -4   3 -20 2.76578 0.53546   2
   4   3 -20 3.45365 0.66088   1
  -4  -3  20 2.03425 0.70527   3
   4  -3 -21 1.43865 0.92476   1
  -4  -3 -21 0.54934 0.50198   2
  -4  -3  21 0.28952 0.54213   3
   4   3 -21 1.42321 0.64175   1
  -4   3 -21-0.63696 0.52245   2
   4   3 -21-0.23670 0.51431   2
   4  -3  21-0.57201 0.84641   3
   4  -3 -21 0.03147 0.53126   2
   4  -3  22 1.45265 0.91105   3
   4   3 -22 0.36574 0.80698   1
  -4   3 -22 0.87638 0.54525   2
   4  -3 -22 0.83582 0.55258   2
   4   3 -22 1.41900 0.57864   2
  -4  -3 -22 1.88601 0.53562   2
   4  -3 -22 0.03739 0.89745   1
   4   3 -23 0.87124 0.56686   2
  -4  -3 -23 0.74397 0.56478   2
   4  -3  23-1.02588 0.91425   3
   4  -3 -23 0.56244 0.54871   2
   4  -3 -23 1.43563 0.96231   1
   4   3 -23 1.41462 0.82210   1
  -4   3 -23 1.27218 0.57485   2
   4   3 -24 0.32023 0.61936   2
   4  -3 -24 0.40220 0.99060   1
  -4  -3 -24 1.21709 0.62947   2
  -4   3 -24 0.69558 0.62097   2
   4   3 -24 1.92816 0.87852   1
   4  -3 -24 0.76769 0.59549   2
   4   3 -25 0.87488 0.62404   2
  -4  -3 -25 1.30483 0.63110   2
   4  -3 -25-0.63693 0.65676   2
   4  -3 -25 0.53625 1.00112   1
  -4   3 -25-0.50288 0.63262   2
  -4  -3 -26 3.22312 0.66862   2
   4  -3 -26 3.42152 0.68631   2
   4   3 -26 2.51093 0.65526   2
   4  -3 -27 0.10569 0.65925   2
  -4  -3 -27-0.56730 0.67832   2
  -4  -3 -28 0.60165 0.68948   2
   4  -3 -28 1.46354 0.69630   2
   4  -3 -29 1.20709 0.72900   2
  -4  -3 -29 0.51882 0.73838   2
   4  -3 -30 1.55921 0.75436   2
  -4  -3 -30 0.12191 0.75278   2
  -4  -3 -31 1.46939 0.81817   2
   4  -3 -31-0.01260 0.79645   2
   4  -3 -32 3.34398 0.86558   2
  -4  -3 -32 2.88309 0.86197   2
  -4  -4   0 29.2665 1.76088   1
  -4  -4   0 31.5446 1.72343   2
   4  -4   0 33.1801 1.72077   2
   4  -4  -1 2.49563 0.39113   2
  -4  -4   1 1.85105 0.59981   1
  -4  -4  -1 2.21232 0.37664   2
  -4  -4  -1 1.82710 0.47252   1
  -4   4   2 19.6890 1.22958   2
   4   4   2 19.7412 1.21376   2
  -4  -4  -2 17.7703 1.20116   1
  -4  -4  -2 19.9129 1.11021   2
  -4  -4   2 20.2454 1.24461   1
   4  -4  -2 21.6794 1.11042   2
   4   4  -3-0.12274 0.46430   1
   4   4   3 0.39601 0.47702   2
   4  -4  -3 0.25584 0.28735   2
  -4  -4  -3 0.01468 0.31489   2
  -4  -4   3 0.08961 0.57862   1
  -4   4   3 0.14724 0.47025   2
  -4  -4  -3 0.09637 0.57452   1
  -4  -4  -3-0.18215 1.02208   3
  -4   4   4 8.80537 0.69530   2
  -4  -4  -4 9.51737 0.76734   1
  -4  -4  -4 12.1390 0.62718   2
   4  -4  -4 10.6613 0.62348   2
   4   4  -4 9.02817 0.72165   1
   4   4   4 9.44869 0.69038   2
  -4  -4  -4 10.7609 1.13202   3
   4   4  -5 0.51345 0.50517   1
  -4   4   5-0.57445 0.42129   2
  -4  -4  -5 0.16498 0.52601   1
   4  -4  -5-0.14723 0.30097   2
  -4  -4  -5-0.19984 0.92945   3
   4   4   5-0.06631 0.41095   2
  -4  -4  -5-0.06665 0.30434   2
   4  -4  -6 10.1784 0.58340   2
  -4   4   6 9.73574 0.64749   2
   4   4   6 9.61158 0.63569   2
  -4  -4  -6 8.71311 0.59020   2
   4   4  -6 8.54467 0.72598   1
  -4  -4   6 8.99547 0.57311   2
  -4  -4  -6 9.65006 1.13885   3
  -4  -4   7 0.04878 0.29436   2
  -4  -4  -7 0.05277 1.04139   3
   4   4   7-0.01132 0.37622   2
  -4   4   7 0.59091 0.39357   2
   4  -4  -7 0.19679 0.30637   2
  -4  -4   7 0.39326 0.71719   1
   4  -4   7 0.60515 0.30187   2
   4   4  -7 0.28867 0.46702   1
  -4  -4  -7 0.33705 0.29988   2
   4   4  -8 8.80521 0.74156   1
  -4  -4   8 9.16080 0.59337   2
   4  -4   8 10.3865 0.59009   2
  -4   4   8 8.98507 0.63857   2
   4  -4  -8 8.98150 0.58239   2
  -4  -4  -8 8.64885 0.58546   2
   4   4   8 8.90106 0.63735   2
  -4  -4   8 9.12151 0.89134   1
  -4  -4  -8 8.68683 1.12564   3
  -4   4   9 18.3110 1.09971   2
   4  -4   9 19.6341 1.06345   2
  -4  -4   9 18.6859 1.06090   2
  -4  -4  -9 20.8895 1.47089   3
  -4  -4   9 20.2326 1.28780   1
   4  -4  -9 18.6079 1.06021   2
  -4  -4  -9 20.3910 1.06927   2
   4   4   9 19.4404 1.10168   2
   4   4  -9 18.3593 1.16367   1
   4   4 -10 0.54603 0.53616   1
  -4  -4  10 1.35924 0.74095   1
   4  -4  10 1.40081 0.34486   2
  -4   4  10 1.28271 0.42466   2
   4   4  10 1.47605 0.41851   2
  -4  -4 -10 2.25090 1.01297   3
  -4  -4  10 1.50473 0.33213   2
   4  -4 -10 1.66286 0.34234   2
  -4  -4 -10 0.85553 0.33272   2
   4  -4 -11 0.54822 0.35693   2
  -4  -4  11 0.45783 0.33907   2
   4  -4  11 0.06550 0.34107   2
   4   4 -11 1.42502 0.50221   1
  -4   4  11 0.42732 0.40963   2
   4   4  11 0.46794 0.41525   2
  -4  -4  11-0.60146 0.75208   1
  -4  -4 -11-0.01149 1.03753   3
  -4  -4 -11 0.75423 0.34697   2
   4  -4  11 0.18340 0.33511   1
   4   4 -12 27.0233 1.73025   1
  -4  -4  12 31.9185 1.67943   2
   4  -4  12 32.9190 1.68121   2
   4  -4 -12 32.2910 1.68980   2
  -4   4  12 30.8752 1.70901   2
   4   4  12 29.9752 1.70226   2
  -4  -4 -12 29.7338 1.96119   3
  -4  -4  12 33.1725 1.82362   1
   4  -4  12 30.9263 1.66264   1
  -4  -4 -12 32.4403 1.69204   2
   4  -4 -13 6.07444 0.77121   3
   4  -4  13 7.71100 0.52426   2
  -4  -4  13 7.15839 0.51706   2
   4   4 -13 5.69365 0.67206   1
   4  -4 -13 7.44283 0.52549   2
  -4  -4  13 7.61389 0.83280   1
  -4   4  13 6.58031 0.56394   2
   4   4  13 6.99911 0.56403   2
  -4  -4 -13 6.86507 0.53526   2
   4  -4  13 5.50514 0.42718   1
  -4  -4 -13 5.98494 1.00912   3
  -4  -4  14 2.17563 0.37993   2
   4  -4 -14 2.54607 0.38784   2
   4   4 -14 1.07777 0.57352   1
   4  -4  14 2.17033 0.38271   2
  -4  -4  14 2.69718 0.89324   1
  -4   4  14 1.78568 0.42856   2
   4   4  14 2.23971 0.44002   2
   4  -4 -14 2.50575 0.75775   1
   4  -4 -14 2.05133 0.68553   3
  -4  -4 -14 2.49091 0.41342   2
  -4  -4 -14 1.83084 0.84166   3
  -4   4  15 3.73025 0.50049   2
  -4  -4  15 4.17229 0.81861   1
   4  -4  15 4.58220 0.43747   2
   4   4 -15 5.03758 0.67483   1
  -4  -4 -15 3.63354 0.91258   3
   4  -4 -15 3.84288 0.77326   1
   4   4  15 4.35936 0.50779   2
  -4  -4  15 4.06666 0.43658   2
  -4  -4 -15 4.27943 0.45475   2
   4  -4 -15 4.79609 0.46515   2
  -4  -4  15 2.77314 0.81171   3
   4   4 -16 2.28749 0.65606   1
  -4  -4  16 1.53178 0.77739   1
   4  -4  16 1.55908 0.39766   2
  -4  -4 -16 1.99241 0.43176   2
   4  -4 -16 1.00101 0.77044   1
   4   4  16 2.23601 0.44990   2
  -4   4  16 1.35840 0.46830   2
   4  -4 -16 2.09944 0.40886   2
  -4  -4  16 2.59430 0.76778   3
  -4  -4  16 1.82356 0.40203   2
   4  -4 -17 1.18637 0.81279   1
  -4  -4  17 0.05977 0.80947   1
  -4  -4  17 0.36166 0.41195   2
  -4  -4 -17 0.53083 0.45296   2
   4  -4  17 0.49083 0.39904   2
  -4   4  17 0.17677 0.44614   2
   4   4  17 0.75649 0.45346   2
   4  -4 -17 0.51403 0.43082   2
   4   4 -17 0.63576 0.67124   1
  -4  -4  17-1.29629 0.77861   3
   4  -4 -18 4.19367 0.51853   2
  -4  -4  18 4.52781 0.85825   1
  -4  -4  18 3.42517 0.78947   3
  -4  -4 -18 4.77786 0.51277   2
  -4   4  18 3.37332 0.52141   2
  -4  -4  18 3.19246 0.47483   2
   4   4 -18 2.93203 0.72781   1
   4   4  18 3.46952 0.50439   2
   4  -4  18 3.73916 0.47886   2
   4  -4 -18 4.40800 0.91061   1
  -4  -4  19 0.74768 0.87318   1
   4  -4 -19 0.82721 0.87140   1
   4  -4 -19-0.16993 0.44708   2
   4   4 -19 0.89957 0.73065   1
  -4  -4  19 0.51183 0.75762   3
  -4  -4 -19 0.09153 0.46841   2
  -4  -4 -20-0.54236 0.47917   2
   4   4 -20 1.52445 0.78459   1
   4  -4 -20 0.68124 0.86803   1
   4  -4 -20 0.51745 0.50577   2
  -4  -4  20 1.43105 0.76055   3
   4  -4 -21 0.30767 0.91860   1
  -4  -4  21-0.29090 0.80446   3
  -4  -4 -21 0.45559 0.52964   2
   4  -4 -21-0.30496 0.52269   2
   4  -4  21-0.65524 0.93899   3
   4   4 -21 0.10010 0.80058   1
  -4  -4 -22 0.08601 0.52604   2
   4  -4 -22 0.39498 0.97203   1
   4  -4 -22 0.77466 0.51733   2
   4  -4  22 1.09000 0.83283   3
   4   4 -22 0.62508 0.81286   1
  -4  -4  22-0.04518 0.76016   3
   4  -4  23 0.65402 0.85735   3
  -4  -4  23 0.29545 0.66295   3
   4  -4 -23-1.02819 0.56633   2
   4  -4 -23-0.72452 1.22297   1
  -4  -4 -23 0.40266 0.56825   2
   4  -4 -24 0.40542 0.62061   2
   4  -4 -24-0.71818 1.06564   1
  -4  -4 -24 0.19744 0.61017   2
   4  -4 -25-0.39736 1.04717   1
   4  -4 -25 0.46936 0.62828   2
  -4  -4 -25 0.50514 0.62939   2
   4  -4 -26 0.50315 0.64559   2
  -4  -4 -26 1.81245 0.68914   2
   4  -4 -27 0.83069 0.70341   2
  -4  -4 -27 0.07695 0.68357   2
  -4  -4 -28-0.56843 0.72819   2
   4  -4 -28 1.05342 0.71464   2
   4  -4 -29-0.21080 0.76666   2
  -4  -4 -29 0.33823 0.72360   2
   4  -4 -30 0.44945 0.74410   2
  -4  -4 -30-0.67654 0.73218   2
   4  -4 -31 0.29527 0.74407   2
  -4  -4 -31 0.48206 0.76217   2
   4  -4 -32 0.80414 0.78412   2
  -4  -4 -32 1.16361 0.82293   2
  -4  -5   0 19.5900 1.19868   2
  -4  -5   0 21.7389 1.24387   1
   4  -5   0 20.2734 1.21656   2
   4  -5   1 8.37677 0.84047   2
  -4  -5   1 10.0469 0.87053   2
  -4  -5  -1 10.7453 0.71851   2
  -4  -5   1 9.91311 0.82066   1
  -4  -5  -1 11.3352 0.81942   1
   4  -5  -1 11.3993 0.70647   2
   4   5   2 7.83647 0.82256   2
  -4  -5   2 6.89822 0.64466   1
  -4  -5  -2 8.09625 0.58874   2
  -4   5   2 8.71615 0.84948   2
   4  -5  -2 9.32759 0.58638   2
  -4  -5   3 9.67240 0.83714   1
   4   5   3 11.6241 0.85765   2
  -4   5   3 11.2698 0.88317   2
  -4  -5  -3 10.8742 0.68755   2
   4  -5  -3 11.7905 0.69541   2
  -4  -5  -4 6.22578 0.49024   2
  -4   5   4 6.05491 0.65784   2
   4   5   4 6.55800 0.61907   2
   4  -5  -4 6.22099 0.47284   2
  -4  -5  -5-0.13254 0.32677   2
  -4   5   5 0.75795 0.44418   2
   4   5   5-0.05820 0.46685   2
   4  -5  -5 0.52098 0.34002   2
  -4   5   6 41.9041 2.28137   2
  -4  -5  -6 43.0669 2.25487   2
   4  -5  -6 45.3195 2.25861   2
  -4  -5   6 36.9840 2.33415   1
   4   5   6 42.2048 2.27480   2
  -4  -5  -7 4.07649 0.42481   2
  -4   5   7 4.05805 0.50675   2
   4   5   7 4.47783 0.50984   2
   4  -5  -7 4.34342 0.41446   2
  -4  -5   7 3.96169 0.73404   1
  -4  -5  -7 3.88221 1.02147   3
  -4  -5   8 7.20911 0.53407   2
   4   5   8 7.45215 0.62792   2
  -4  -5   8 8.48626 0.84170   1
   4  -5   8 7.31237 0.53705   2
   4  -5  -8 8.69274 0.54365   2
  -4  -5  -8 8.39124 0.55138   2
  -4  -5  -8 8.60709 1.12954   3
  -4   5   8 6.59702 0.61774   2
  -4   5   9-0.03944 0.44286   2
   4   5   9-0.09972 0.44809   2
   4  -5   9 0.39114 0.34432   2
  -4  -5  -9-1.05998 1.00097   3
  -4  -5   9-0.03847 0.33717   2
   4  -5  -9 0.17797 0.33090   2
  -4  -5  -9 0.59262 0.35043   2
  -4  -5   9 0.00779 0.76815   1
  -4  -5  10 22.5217 1.38152   1
  -4  -5 -10 20.1907 1.57375   3
  -4  -5  10 23.7024 1.23026   2
   4   5  10 19.5122 1.23306   2
   4  -5 -10 22.9536 1.21108   2
  -4  -5 -10 20.1794 1.21696   2
   4  -5  10 24.7172 1.22506   2
  -4   5  10 19.2074 1.23454   2
  -4  -5  11 28.7846 1.59696   2
   4  -5  11 30.4012 1.60224   2
  -4   5  11 27.6513 1.63018   2
   4   5  11 30.2489 1.64028   2
  -4  -5  11 31.5082 1.77146   1
  -4  -5 -11 29.7910 1.88693   3
   4  -5 -11 30.6750 1.61112   2
  -4  -5 -11 30.8069 1.61365   2
   4   5 -11 28.8270 1.67770   1
  -4  -5 -12 3.67134 0.40883   2
   4  -5 -12 3.57759 0.41967   2
  -4  -5  12 3.28162 0.39535   2
   4  -5  12 3.24095 0.37348   2
  -4  -5 -12 4.06162 1.04171   3
  -4   5  12 2.97667 0.47456   2
   4   5  12 2.35875 0.47539   2
  -4  -5  12 3.28681 0.77274   1
   4   5 -12 1.77299 0.57052   1
   4   5 -13 4.70829 0.67918   1
  -4  -5 -13 7.20065 0.53675   2
  -4  -5  13 6.07017 0.50495   2
  -4  -5 -13 6.57942 1.03926   3
  -4   5  13 6.24887 0.56476   2
  -4  -5  13 6.83994 0.82991   1
   4  -5 -13 7.41844 0.54639   2
   4   5  13 7.13942 0.57745   2
   4  -5  13 6.80507 0.51430   2
   4  -5 -14 0.48089 0.38053   2
  -4  -5 -14 1.43914 1.08059   3
  -4  -5  14 0.44190 0.35446   2
   4  -5  14 0.19733 0.36345   2
  -4   5  14 0.69446 0.43633   2
   4   5  14 0.86547 0.42994   2
  -4  -5 -14 0.23947 0.38497   2
   4   5 -14 1.14550 0.57731   1
  -4  -5  14-0.39209 0.74194   1
  -4  -5 -15 0.65483 0.97459   3
  -4  -5 -15 1.34918 0.42582   2
  -4  -5  15 1.26104 0.38521   2
   4  -5  15 1.76259 0.40058   2
  -4  -5  15 0.19264 0.77291   1
   4  -5 -15 0.94923 0.73043   3
  -4   5  15 0.52563 0.45367   2
   4  -5 -15 1.27431 0.40023   2
   4   5  15 1.62953 0.46356   2
   4  -5  16 16.4710 0.93299   2
  -4  -5  16 14.7034 0.92018   2
  -4  -5 -16 14.8307 1.24535   3
  -4   5  16 13.6053 0.96679   2
   4   5  16 14.5360 0.95391   2
  -4  -5 -16 16.4808 0.94335   2
  -4  -5  16 16.2172 1.21320   1
   4  -5 -16 17.4526 0.95314   2
   4  -5  17-0.19184 0.39836   2
  -4  -5  17-0.01000 0.82925   1
   4  -5 -17 0.48061 0.41352   2
  -4  -5 -17-0.13006 0.86820   3
   4  -5 -17 1.13397 0.85884   1
   4   5  17-0.20909 0.48490   2
  -4  -5 -17 0.50352 0.43974   2
  -4   5  17 0.56362 0.48088   2
  -4  -5  17 0.59394 0.40965   2
  -4  -5 -18-0.60815 0.46557   2
  -4  -5  18-0.60048 0.82212   1
   4  -5 -18-0.76349 0.90830   1
   4  -5 -18-0.30512 0.45681   2
  -4  -5  19 4.36247 0.91419   1
  -4  -5 -19 4.47351 0.54946   2
   4  -5 -19 2.41756 0.97468   1
   4  -5 -19 2.92145 0.53812   2
  -4  -5  19 3.39653 0.87983   3
  -4  -5 -20-0.76950 0.51915   2
   4  -5 -20-0.62335 0.97601   1
   4  -5 -20-0.90287 0.52184   2
  -4  -5  20 2.12629 0.94363   1
  -4  -5  20 0.03651 0.84279   3
   4  -5 -21 7.29506 0.66144   2
  -4  -5 -21 6.89868 0.68626   2
  -4  -5  21 4.37332 1.01180   1
  -4  -5  21 5.97597 0.89697   3
   4  -5 -21 4.56398 1.06484   1
   4  -5 -22 3.56044 0.58181   2
  -4  -5 -22 2.92821 0.62034   2
  -4  -5  22 1.68951 0.83519   3
   4  -5 -22 0.36254 1.05829   1
  -4  -5  23 1.62425 0.83878   3
   4  -5 -23 1.65258 1.02759   1
  -4  -5 -23 1.74713 0.57019   2
   4  -5 -23 0.24565 0.58061   2
   4  -5 -24 3.74221 1.10070   1
  -4  -5 -24 3.11043 0.64442   2
   4  -5 -24 2.53409 0.60622   2
  -4  -5  24 1.86914 0.81430   3
   4  -5 -25 0.93614 0.63854   2
   4  -5 -25-0.31429 1.32189   1
  -4  -5 -25 1.24385 0.62998   2
  -4  -5 -26-0.21777 0.68093   2
   4  -5 -26 0.09500 0.66516   2
  -4  -5 -27 1.33322 0.73026   2
   4  -5 -27 1.53064 0.74296   2
   4  -5 -28 1.43838 0.69788   2
  -4  -5 -28 0.44741 0.68951   2
  -4  -5 -29 1.27776 0.75426   2
   4  -5 -29 0.47200 0.73469   2
   4  -5 -30 0.16959 0.75319   2
  -4  -5 -30 0.59958 0.75583   2
  -4  -5 -31 1.27563 0.78906   2
   4  -5 -31 0.66075 0.78941   2
  -4  -5 -32 0.98999 0.81756   2
   4  -5 -32-0.25339 0.83053   2
   4  -6   0 34.0733 1.87735   2
  -4  -6   0 33.5137 1.88281   2
   4  -6  -1 0.04232 0.49440   2
  -4  -6   1 0.72666 0.64056   1
  -4  -6   1 1.37470 0.63750   2
  -4  -6  -1 0.27663 0.46427   2
   4  -6   1-0.07575 0.66886   2
   4  -6  -2 10.1604 0.72650   2
   4   6   2 11.5932 1.03338   2
  -4  -6  -2 11.6017 0.73816   2
  -4  -6   2 10.8686 0.86391   1
  -4   6   2 12.6556 1.02914   2
   4  -6  -3 37.5925 1.91882   2
  -4  -6  -3 34.2530 1.91518   2
  -4  -6   3 34.0367 1.97638   1
  -4   6   3 34.9198 2.02052   2
   4   6   3 37.7961 2.02356   2
   4   6   4 0.88346 0.61279   2
  -4  -6  -4 1.12831 0.37770   2
   4  -6  -4 0.86420 0.38371   2
  -4   6   4 1.28237 0.67312   2
  -4   6   5 32.2767 1.80666   2
  -4  -6  -5 33.0102 1.74513   2
   4  -6  -5 32.3772 1.74508   2
   4   6   5 31.6499 1.80239   2
  -4   6   6 37.2418 2.15755   2
   4  -6  -6 40.0218 2.11879   2
  -4  -6  -6 39.7701 2.12478   2
   4   6   6 39.0643 2.15187   2
  -4  -6   6 48.2160 2.29515   1
  -4   6   7 0.90812 0.51743   2
   4   6   7 1.83247 0.52556   2
   4  -6  -7 1.70945 0.37920   2
  -4  -6  -7 1.22958 0.41002   2
  -4  -6   7 0.48305 0.71118   1
   4   6   8 15.9258 1.02293   2
  -4   6   8 15.0058 1.02407   2
   4  -6  -8 18.0243 0.95700   2
  -4  -6   8 17.9404 1.16843   1
  -4  -6  -8 15.9736 0.96749   2
   4   6   9 13.0885 0.86642   2
   4  -6   9 12.7908 0.79506   2
  -4  -6  -9 14.5530 0.80750   2
  -4  -6   9 11.4701 0.78459   2
   4  -6  -9 13.9779 0.80948   2
  -4  -6   9 12.3184 1.03532   1
  -4   6   9 12.8678 0.86513   2
  -4   6  10 0.34838 0.46476   2
  -4  -6  10 0.55832 0.76871   1
  -4  -6  10 0.48161 0.36147   2
   4  -6  10 0.71537 0.33690   2
   4  -6 -10 0.62350 0.36238   2
  -4  -6 -10-0.03698 0.38883   2
   4   6  10 0.58441 0.48210   2
  -4  -6 -10-0.16970 1.03023   3
  -4  -6  11 0.26392 0.37943   2
   4  -6 -11 0.72009 0.37100   2
  -4   6  11 0.47266 0.46261   2
  -4  -6 -11 0.28329 0.40018   2
  -4  -6  11 0.56376 0.75424   1
   4   6  11 1.00405 0.47043   2
   4  -6  11 0.83362 0.37446   2
  -4  -6 -11 0.09573 0.94768   3
  -4  -6 -12 1.42169 0.38489   2
  -4  -6 -12 1.69513 0.99638   3
   4  -6 -12 1.06078 0.41638   2
  -4  -6  12 1.96482 0.75818   1
  -4  -6  12 1.28289 0.38109   2
   4  -6  12 0.66894 0.39738   2
  -4   6  12 1.46902 0.47393   2
   4   6  12 1.28886 0.46449   2
  -4  -6  13 8.54441 0.60736   2
   4   6  13 8.41167 0.67410   2
   4  -6  13 9.52156 0.62411   2
  -4   6  13 8.15912 0.69502   2
   4  -6 -13 9.54480 0.64699   2
  -4  -6 -13 9.58728 0.63554   2
  -4  -6 -13 7.79809 1.10233   3
  -4  -6  13 9.80660 0.89877   1
  -4  -6  14 1.18180 0.39145   2
   4  -6 -14 1.21732 0.41748   2
   4  -6  14 1.32146 0.38645   2
  -4   6  14 0.87450 0.50888   2
   4   6  14 1.26687 0.50200   2
  -4  -6 -14 0.68617 0.43095   2
  -4  -6  14 1.61212 0.78287   1
  -4  -6 -14 1.43203 1.00151   3
  -4  -6 -15-0.39718 1.03742   3
   4  -6  15 0.01025 0.38697   2
   4   6  15 0.17423 0.49196   2
  -4  -6  15-0.09886 0.37699   2
  -4  -6  15-0.27577 0.77063   1
  -4   6  15-0.13745 0.50620   2
  -4  -6 -15 0.55460 0.42113   2
   4  -6 -15 0.19722 0.43068   2
  -4  -6  16 1.30819 0.78222   1
   4  -6  16 1.45883 0.42898   2
  -4  -6  16 1.95311 0.42004   2
  -4   6  16 0.86409 0.51051   2
   4   6  16 1.67227 0.50523   2
  -4  -6 -16 2.20400 0.46514   2
  -4  -6 -16 1.26407 1.04270   3
   4  -6 -16 1.11916 0.45562   2
   4  -6 -17 0.39454 0.47151   2
   4  -6  17 1.18453 0.45556   2
  -4  -6 -17 0.12773 1.03225   3
  -4  -6  17 0.14910 0.77157   1
  -4   6  17 0.84975 0.48695   2
   4   6  17 0.49284 0.49022   2
  -4  -6 -17 1.01138 0.49272   2
  -4  -6  17 0.94656 0.43766   2
  -4  -6 -18-0.10773 0.45257   2
  -4  -6 -18 0.85472 0.91325   3
   4  -6 -18 1.07297 0.46869   2
  -4  -6  18 0.92442 1.00535   1
  -4  -6  19 5.43665 0.95369   1
  -4  -6 -19 4.21113 1.01005   3
   4  -6 -19 5.52115 0.59831   2
  -4  -6 -19 5.76426 0.60963   2
  -4  -6 -20 4.05874 0.58528   2
   4  -6 -20 4.27577 0.60693   2
  -4  -6  20 4.87461 0.95498   1
   4  -6 -20 4.82724 1.05382   1
  -4  -6  21 2.68243 0.97018   1
  -4  -6 -21 0.11716 0.56739   2
   4  -6 -21 1.54009 0.54462   2
   4  -6 -21-0.47353 1.03568   1
  -4  -6  21 0.19538 0.91421   3
   4  -6 -22 0.12018 0.62048   2
  -4  -6 -22 0.97036 0.59461   2
  -4  -6  22 1.74236 0.98717   1
   4  -6 -22 0.34146 1.07076   1
  -4  -6  22 0.35173 0.88839   3
   4  -6 -23-0.81129 1.15347   1
  -4  -6  23 1.44598 0.87910   3
  -4  -6  23 0.41315 1.01683   1
   4  -6 -23-0.51900 0.64717   2
  -4  -6 -23-0.24791 0.63727   2
   4  -6 -24-0.39823 0.62095   2
  -4  -6  24-0.27481 0.88576   3
  -4  -6 -24 0.30828 0.61003   2
   4  -6 -24 0.07900 1.14494   1
  -4  -6 -25 1.40108 0.61218   2
   4  -6 -25 1.34693 1.16009   1
   4  -6 -25 0.63318 0.65135   2
   4  -6 -26 2.46470 0.67262   2
  -4  -6 -26 1.42313 0.65615   2
  -4  -6 -27-0.20604 0.66767   2
   4  -6 -27 2.12006 0.66893   2
   4  -6 -28-0.04687 0.73046   2
  -4  -6 -28 0.84623 0.73115   2
   4  -6 -29 0.01233 0.76093   2
  -4  -6 -29-0.59736 0.75722   2
   4  -6 -30 1.47389 0.78147   2
  -4  -6 -30 1.46752 0.78983   2
   4  -6 -31 0.81797 0.81663   2
  -4  -6 -31 0.43960 0.80975   2
   4  -6 -32-0.45382 0.79739   2
  -4  -6 -32 1.34824 0.81141   2
  -4  -7   0 0.67512 0.64331   2
   4  -7   0 0.23735 0.60080   2
  -4  -7   1 1.75708 0.68930   2
   4  -7   1 0.64440 0.72139   2
  -4  -7  -1 0.35131 0.53562   2
   4  -7  -1 1.01692 0.55424   2
   4  -7  -2 6.62879 0.59760   2
  -4  -7  -2 6.30794 0.58537   2
  -4   7   3 2.93963 0.84838   2
   4  -7  -3 2.18522 0.46046   2
   4   7   3 2.19971 0.84800   2
  -4  -7  -3 2.13689 0.46231   2
   4   7   4 9.78078 0.93605   2
  -4   7   4 9.83343 0.93712   2
   4  -7  -4 10.5757 0.67735   2
  -4  -7  -4 8.78445 0.68493   2
   4  -7  -5 7.60281 0.59951   2
   4   7   5 7.06387 0.78564   2
  -4  -7  -5 7.91384 0.59284   2
  -4   7   5 8.39829 0.81161   2
  -4   7   6 9.98296 0.88980   2
   4  -7  -6 12.5347 0.75320   2
   4   7   6 11.1639 0.87468   2
  -4  -7   6 10.3759 0.88737   1
  -4  -7  -6 12.2478 0.75859   2
  -4   7   7 0.18358 0.57311   2
   4   7   7 1.13583 0.56614   2
  -4  -7  -7 1.21681 0.41646   2
  -4  -7   7 2.18185 0.76690   1
   4  -7  -7 1.54981 0.39747   2
  -4   7   8 16.4313 1.09970   2
   4  -7  -8 17.5523 1.02634   2
  -4  -7  -8 17.7293 1.03791   2
   4   7   8 16.5486 1.08963   2
  -4  -7   8 22.7238 1.37401   1
  -4  -7   9 8.43262 0.90070   1
   4  -7  -9 10.5879 0.69493   2
   4   7   9 9.95015 0.76574   2
  -4  -7  -9 11.0597 0.68874   2
  -4   7   9 8.88734 0.79231   2
  -4  -7  10 1.60822 0.38933   2
  -4   7  10 2.03232 0.53367   2
   4   7  10 1.59235 0.53439   2
  -4  -7 -10 1.61728 0.43638   2
   4  -7  10 2.06918 0.39737   2
  -4  -7  10 1.93400 0.76034   1
   4  -7 -10 2.10748 0.43517   2
  -4  -7  11 8.28975 0.58874   2
  -4   7  11 8.22917 0.68904   2
   4   7  11 7.91533 0.67829   2
  -4  -7  11 6.52626 0.84161   1
   4  -7  11 7.65669 0.58528   2
   4  -7 -11 9.35098 0.61582   2
  -4  -7 -11 7.76494 0.61396   2
  -4  -7  12 3.82742 0.43384   2
  -4  -7  12 3.51134 0.79016   1
   4   7  12 3.17714 0.54407   2
   4  -7  12 4.11447 0.43396   2
   4  -7 -12 4.29381 0.45647   2
  -4   7  12 3.18913 0.55782   2
  -4  -7 -12 3.08034 1.07470   3
  -4  -7 -12 3.39789 0.45709   2
  -4  -7  13 7.19787 0.58799   2
   4   7  13 6.13798 0.64105   2
   4  -7 -13 6.01126 0.56999   2
  -4   7  13 5.52577 0.60963   2
   4  -7  13 6.92078 0.58018   2
  -4  -7 -13 6.49644 0.57217   2
  -4  -7  13 4.74808 0.86612   1
  -4  -7 -13 5.48407 1.08099   3
  -4  -7  14 5.69604 0.88741   1
   4  -7  14 6.63023 0.53343   2
   4   7  14 5.89274 0.61439   2
  -4   7  14 5.52884 0.61219   2
   4  -7 -14 6.68338 0.57087   2
  -4  -7 -14 7.17754 0.55894   2
  -4  -7  14 5.76340 0.52857   2
  -4  -7 -14 6.84456 1.11837   3
   4   7  15 1.00425 0.50485   2
   4  -7  15 1.14946 0.39852   2
  -4  -7  15 1.30979 0.80391   1
  -4  -7  15 0.89538 0.39259   2
  -4   7  15 0.96837 0.53998   2
  -4  -7 -15 0.87949 1.06450   3
  -4  -7 -15 0.36643 0.41833   2
   4  -7 -15 0.60538 0.45482   2
  -4  -7 -16 1.94219 1.07157   3
   4   7  16 1.25222 0.52782   2
   4  -7  16 0.45828 0.42048   2
  -4   7  16 0.59891 0.51501   2
  -4  -7  16 1.79194 0.80781   1
  -4  -7  16 0.36763 0.41429   2
  -4  -7 -16 0.84329 0.46181   2
   4  -7 -16 0.53737 0.44078   2
   4  -7 -17 0.14408 0.45268   2
  -4  -7 -17 0.45413 0.48743   2
  -4  -7  17 0.19581 0.87405   1
  -4  -7 -17-0.24644 1.09123   3
  -4  -7  18 7.97572 0.96500   1
   4  -7  18 4.88672 0.41825   1
   4  -7 -18 8.89397 0.61508   2
  -4  -7 -18 7.03643 0.60596   2
  -4  -7 -18 7.11567 1.17764   3
   4  -7 -19 1.16716 0.53422   2
  -4  -7  19 1.92035 0.92922   1
  -4  -7 -19 1.21701 0.54640   2
  -4  -7 -19 2.94051 1.07188   3
  -4  -7  20 2.31840 1.05148   1
   4  -7 -20 2.51647 0.54606   2
  -4  -7 -20 2.10380 0.54286   2
  -4  -7 -20 2.11850 0.89380   3
   4  -7 -21 2.75014 0.58605   2
  -4  -7  21 2.53198 0.99267   1
  -4  -7 -21 2.97681 0.59468   2
  -4  -7 -22 0.25760 0.57964   2
   4  -7 -22 0.97599 1.17524   1
   4  -7 -22 0.54540 0.58064   2
   4  -7 -23 1.63743 1.14145   1
  -4  -7 -23 0.85385 0.64214   2
  -4  -7  23-0.92788 1.02669   1
   4  -7 -23 0.21670 0.61793   2
  -4  -7 -24 1.94347 0.69686   2
   4  -7 -24-0.47383 1.22283   1
   4  -7 -24 0.63828 0.66652   2
  -4  -7  24 0.71323 0.93339   3
   4  -7 -25-0.46129 0.66526   2
  -4  -7 -25 0.55313 0.68776   2
   4  -7 -25 0.80673 1.21245   1
  -4  -7 -26-0.27390 0.68874   2
   4  -7 -26 0.70838 0.69675   2
   4  -7 -27 1.04523 0.72570   2
  -4  -7 -27-0.33654 0.72589   2
   4  -7 -28 1.21209 0.72786   2
  -4  -7 -28 1.11731 0.73510   2
   4  -7 -29-0.25958 0.76164   2
  -4  -7 -29 0.73895 0.73011   2
   4  -7 -30-0.39316 0.80633   2
  -4  -7 -30 0.18918 0.82574   2
   4  -7 -31-0.57642 0.82629   2
  -4  -7 -31-0.55253 0.80999   2
  -4  -8   0 15.0238 1.04912   2
   4  -8   0 16.0835 1.09324   2
  -4  -8   1 8.89112 0.91878   2
  -4  -8  -1 10.4925 0.79988   2
   4  -8  -1 10.7421 0.82117   2
   4  -8   1 10.3414 0.95095   2
  -4  -8  -2-0.03994 0.50220   2
   4  -8  -2-0.39686 0.51401   2
   4   8   3 4.07193 0.99743   2
  -4   8   3 5.49839 1.01014   2
   4  -8  -3 5.44763 0.56854   2
  -4  -8  -3 4.24089 0.53779   2
   4  -8  -4 5.81593 0.57646   2
  -4  -8  -4 4.42628 0.53869   2
   4   8   4 5.66189 0.90963   2
  -4   8   4 6.01793 0.92358   2
  -4  -8  -5 76.0848 4.17745   2
  -4   8   5 77.8821 4.23780   2
   4  -8  -5 82.6227 4.17678   2
   4   8   5 82.5276 4.24014   2
  -4  -8  -6 4.16993 0.50303   2
  -4   8   6 3.69751 0.74319   2
   4  -8  -6 3.99417 0.49591   2
   4   8   6 3.43682 0.73432   2
  -4  -8   6 3.42122 0.84228   1
   4  -8  -7 12.6026 0.81932   2
  -4  -8   7 16.0048 1.03225   1
  -4  -8  -7 11.5229 0.80333   2
  -4   8   7 10.7876 0.91750   2
   4   8   7 10.9661 0.92888   2
  -4   8   8 5.04406 0.64453   2
   4   8   8 4.53573 0.65327   2
   4  -8  -8 3.29485 0.48915   2
  -4  -8  -8 4.81668 0.48076   2
  -4  -8   8 3.66865 0.62235   1
   4  -8  -9 11.0967 0.73818   2
  -4   8   9 9.44401 0.79635   2
   4   8   9 9.65303 0.81092   2
  -4  -8  -9 10.6654 0.74127   2
  -4  -8   9 10.4755 0.96381   1
   4  -8 -10 19.8229 1.11200   2
  -4  -8 -10 19.5419 1.11071   2
  -4   8  10 18.3437 1.17971   2
   4   8  10 17.8098 1.18184   2
  -4  -8  10 18.1984 1.33257   1
  -4  -8  11 0.09737 0.73681   1
  -4  -8 -11 0.12957 0.42001   2
  -4   8  11 0.77059 0.54531   2
   4   8  11 0.59266 0.54950   2
   4  -8 -11 0.24461 0.43468   2
  -4  -8  11 0.03412 0.39186   2
   4  -8  11 0.91301 0.40690   2
   4  -8 -12 0.60503 0.44335   2
   4   8  12 0.84100 0.55151   2
  -4   8  12 0.85430 0.55245   2
  -4  -8  12 0.68191 0.39826   2
   4  -8  12 0.45179 0.41131   2
  -4  -8  12-0.18437 0.75885   1
  -4  -8 -12 0.69445 0.42914   2
   4  -8  13 1.08887 0.42373   2
   4   8  13 0.52291 0.53443   2
  -4   8  13 0.87046 0.55403   2
  -4  -8  13 0.54491 0.39928   2
  -4  -8  13 1.25952 0.80354   1
   4  -8 -13 0.12298 0.43218   2
  -4  -8 -13 1.20583 0.45390   2
  -4  -8  14 10.2032 1.00861   1
   4   8  14 10.8810 0.83990   2
  -4  -8  14 11.6851 0.76748   2
   4  -8 -14 11.4300 0.78982   2
  -4  -8 -14 11.5634 0.77319   2
  -4  -8 -14 12.8719 1.24845   3
   4  -8  14 11.2613 0.77079   2
  -4   8  14 10.9944 0.82443   2
  -4  -8 -15 4.60645 0.53145   2
   4   8  15 4.84455 0.61389   2
  -4  -8  15 4.52472 0.91528   1
  -4  -8  15 4.18190 0.51364   2
  -4   8  15 4.32766 0.62363   2
   4  -8  15 4.35460 0.52717   2
   4  -8 -15 4.29982 0.53450   2
  -4  -8 -15 4.69572 1.08983   3
   4  -8 -16 6.75114 0.61051   2
  -4  -8 -16 6.37219 0.61627   2
  -4  -8  16 6.54692 0.95612   1
  -4  -8 -16 4.95229 1.13900   3
  -4  -8 -17 0.55306 1.12182   3
  -4  -8  17-0.41227 0.86329   1
  -4  -8 -17 0.54832 0.50178   2
   4  -8 -17 0.87219 0.51236   2
  -4  -8  18 4.19826 0.92589   1
  -4  -8 -18 5.54423 0.61154   2
  -4  -8 -18 5.22532 1.19129   3
   4  -8 -18 4.40841 0.60697   2
   4  -8  19 1.40202 0.35022   1
  -4  -8  19 0.98792 0.91550   1
   4  -8 -19 1.58010 0.53451   2
  -4  -8 -19 0.11655 1.14930   3
  -4  -8 -19 2.45830 0.57462   2
  -4  -8 -20 6.42824 0.69781   2
  -4  -8  20 4.46346 1.01755   1
   4  -8 -20 7.00211 0.67499   2
  -4  -8 -20 5.61380 1.20292   3
   4  -8 -21 1.20230 0.56454   2
  -4  -8 -21-0.12496 0.59020   2
  -4  -8 -22 0.46714 0.62675   2
  -4  -8  22 1.02653 1.03527   1
   4  -8 -22 0.74181 0.62008   2
  -4  -8 -23 1.12196 0.64471   2
   4  -8 -23 1.98553 0.66767   2
  -4  -8  23 0.29052 1.00505   1
  -4  -8 -24-0.66921 0.63898   2
   4  -8 -24 1.42082 1.26229   1
   4  -8 -24-0.80576 0.64365   2
  -4  -8 -25 0.58749 0.66428   2
   4  -8 -25-1.26881 1.25682   1
   4  -8 -25-0.74873 0.69893   2
   4  -8 -26 2.04385 0.71963   2
  -4  -8 -26-0.39250 0.72264   2
  -4  -8 -27 1.10624 0.74225   2
   4  -8 -27 0.42938 0.74471   2
  -4  -8 -28 0.83081 0.77156   2
   4  -8 -28-0.41514 0.71785   2
   4  -8 -29 0.39784 0.75789   2
  -4  -8 -29-0.55089 0.74911   2
  -4  -8 -30-0.05322 0.79308   2
   4  -8 -30 0.41327 0.80676   2
   4  -8 -31 0.91732 0.81167   2
  -4  -8 -31 0.39488 0.82387   2
   4  -9   0 4.64540 0.77090   2
  -4  -9   0 4.98625 0.74806   2
   4  -9   1 0.89928 0.80864   2
  -4  -9  -1-0.93764 0.57545   2
  -4  -9   1-0.05168 0.71025   2
   4  -9  -1-0.37510 0.61208   2
   4  -9  -2 2.55519 0.56426   2
   4  -9   2 2.57304 0.89176   2
  -4  -9   2 2.57544 0.84848   2
  -4  -9  -2 2.75252 0.56705   2
   4   9   3 22.3320 1.53721   2
  -4  -9  -3 20.1911 1.20472   2
  -4   9   3 19.9465 1.52998   2
   4  -9  -3 19.6410 1.21289   2
  -4   9   4 9.69287 1.08851   2
   4  -9  -4 8.51425 0.71240   2
   4   9   4 8.84077 1.09060   2
  -4  -9  -4 8.31849 0.69962   2
   4   9   5 1.20361 0.87078   2
  -4   9   5 0.76833 0.84960   2
   4  -9  -5 0.06728 0.49892   2
  -4  -9  -5-0.36473 0.49734   2
   4   9   6 10.1965 0.96723   2
  -4  -9  -6 8.95404 0.69448   2
   4  -9  -6 9.96660 0.72860   2
  -4  -9   6 9.90020 0.92682   1
  -4   9   6 8.30593 0.94401   2
  -4  -9   7 4.54936 0.81524   1
   4   9   7 4.56495 0.76473   2
  -4   9   7 5.42965 0.79586   2
  -4  -9  -7 5.74836 0.56483   2
   4  -9  -7 5.35097 0.57196   2
   4   9   8-0.48719 0.61523   2
  -4   9   8 0.66541 0.67808   2
   4  -9  -8 0.10376 0.46233   2
  -4  -9  -8 0.14226 0.49703   2
  -4  -9   8-0.36844 0.77310   1
   4  -9  -9 2.09820 0.45182   2
  -4  -9  -9 2.34861 0.44903   2
   4   9   9 2.80072 0.63876   2
  -4   9   9 1.26950 0.64760   2
  -4  -9   9 1.51996 0.71350   1
   4  -9 -10 5.30443 0.53708   2
  -4  -9 -10 4.53480 0.53552   2
  -4  -9  10 4.54719 0.78840   1
  -4   9  10 3.42315 0.67342   2
   4   9  10 3.68848 0.63974   2
  -4   9  11 9.10215 0.80590   2
  -4  -9  11 12.1693 1.13281   1
   4   9  11 8.31587 0.81039   2
   4  -9 -11 9.67036 0.68005   2
  -4  -9 -11 9.36184 0.71760   2
   4  -9 -12 0.61511 0.49414   2
  -4   9  12 1.16291 0.60708   2
   4   9  12 1.16297 0.59458   2
  -4  -9 -12 0.77128 0.49352   2
  -4  -9  12 0.81580 0.41028   2
   4  -9  12 1.48721 0.44347   2
  -4  -9  12-0.65079 0.75322   1
  -4   9  13 0.88331 0.60080   2
   4   9  13 0.63913 0.59712   2
  -4  -9  13-0.02859 0.42696   2
   4  -9  13-0.06206 0.42873   2
  -4  -9  13 0.15662 0.80855   1
   4  -9 -13 0.21766 0.47808   2
  -4  -9 -13 0.39464 0.49218   2
  -4   9  14 0.72267 0.60703   2
   4   9  14 0.24339 0.60241   2
  -4  -9  14 0.27329 0.85754   1
  -4  -9  14 0.06490 0.42936   2
   4  -9  14 0.44206 0.43853   2
   4  -9 -14-0.19713 0.48919   2
  -4  -9 -14-0.54853 0.50434   2
  -4  -9  15 3.06376 0.90388   1
   4  -9 -15 4.05398 0.56327   2
  -4  -9 -15 3.93950 0.56080   2
  -4  -9 -16 2.91306 0.52444   2
   4  -9 -16 3.41210 0.54757   2
  -4  -9  16 2.84435 0.92581   1
  -4  -9 -16 2.64042 1.15609   3
   4  -9 -17-0.88337 0.49840   2
  -4  -9 -17-0.29225 0.53580   2
  -4  -9  17 0.76395 0.94289   1
  -4  -9 -17 0.32791 1.11573   3
   4  -9 -18 0.35851 0.54053   2
  -4  -9 -18 2.00694 1.17708   3
  -4  -9 -18-0.27052 0.53953   2
  -4  -9  18-0.55195 0.97801   1
  -4  -9 -19 2.40532 1.16994   3
   4  -9 -19 4.25225 0.58007   2
  -4  -9  19 1.58620 0.98505   1
  -4  -9 -19 3.41521 0.62299   2
  -4  -9 -20-0.87767 1.22514   3
   4  -9  20 0.86818 0.42771   1
  -4  -9  20 0.92181 1.00282   1
   4  -9 -20 0.52407 0.59011   2
  -4  -9 -20 0.58874 0.58243   2
  -4  -9  21 2.12284 1.02847   1
   4  -9 -21 1.75264 0.63082   2
  -4  -9 -21 1.62601 0.61764   2
   4  -9 -22 0.80470 0.62310   2
  -4  -9  22-1.27765 1.05848   1
  -4  -9 -22-0.43043 0.61323   2
  -4  -9  23 2.82363 1.09431   1
  -4  -9 -23 4.28616 0.70070   2
   4  -9 -23 3.26494 0.66622   2
   4  -9 -24 0.34720 0.68063   2
  -4  -9 -24 1.10683 0.69007   2
   4  -9 -25 1.10205 0.71169   2
   4  -9 -25 1.93959 1.39598   1
  -4  -9 -25 1.06050 0.70277   2
   4  -9 -26 1.32087 0.75745   2
  -4  -9 -26 1.16978 0.76277   2
   4  -9 -27 1.29590 0.79391   2
  -4  -9 -27 0.91129 0.78760   2
   4  -9 -28 0.19054 0.77118   2
  -4  -9 -28 0.73265 0.76865   2
   4  -9 -29 0.58688 0.77444   2
  -4  -9 -29 1.23562 0.80184   2
   4  -9 -30-0.30343 0.81009   2
  -4  -9 -30 0.58411 0.80499   2
  -4  -9 -31-0.50403 0.84928   2
   4  -9 -31 0.61195 0.83815   2
  -4 -10   0 3.14565 0.71911   2
   4 -10   0 2.86145 0.79380   2
   4 -10  -1 0.26875 0.67583   2
  -4 -10  -1 0.60769 0.60254   2
  -4 -10   1 1.00463 0.75059   2
   4 -10   1-0.34146 0.82175   2
   4 -10   2-2.02056 0.90699   2
  -4 -10   2 0.46156 0.86340   2
   4 -10  -2-0.11753 0.61012   2
  -4 -10  -2-0.99241 0.59085   2
  -4 -10  -3 5.13800 0.61777   2
   4 -10  -3 4.33064 0.59226   2
  -4  10   4-1.27470 1.01182   2
   4 -10  -4-0.47713 0.53103   2
  -4 -10  -4 0.13321 0.52891   2
   4  10   4 0.07890 0.99217   2
   4 -10  -5 1.84130 0.50694   2
  -4 -10  -5 1.41719 0.55123   2
  -4  10   5 2.88848 0.93647   2
   4  10   5 2.12398 0.95093   2
   4  10   6 2.87013 0.91541   2
  -4  10   6 2.95725 0.90258   2
  -4 -10  -6 2.26839 0.53426   2
   4 -10  -6 2.75420 0.50865   2
   4  10   7 0.21764 0.82921   2
  -4 -10   7 0.09938 0.76274   1
  -4  10   7-0.20180 0.80283   2
   4 -10  -7 0.05135 0.49078   2
  -4 -10  -7 0.49384 0.46585   2
   4  10   8 11.8486 0.99099   2
  -4 -10  -8 10.8215 0.77867   2
  -4  10   8 10.2887 0.95303   2
[truncated: 887,547 more chars]
