# Supplementary material for: Synthesis of a zigzag carbon nanobelt
Source: Springer Nature journal article supplement (doi:10.1038/s41557-020-00627-5), 2021-01-25
Supplement: 41557_2020_627_MOESM2_ESM.mol [file 41557_2020_627_MOESM2_ESM.mol]

nchem.20051217B-comp1.mol
  ChemDraw12102023232D

156186  0  0  0  0  0  0  0  0999 V2000
   -1.1179    4.8288    0.0000 C   0  0  0  0  0  0  0  0  0  0  0  0
   -0.6756    4.1322    0.0000 C   0  0  0  0  0  0  0  0  0  0  0  0
    0.0572    3.7434    0.0000 C   0  0  0  0  0  0  0  0  0  0  0  0
    0.7230    4.0976    0.0000 C   0  0  0  0  0  0  0  0  0  0  0  0
    1.1310    4.8148    0.0000 C   0  0  0  0  0  0  0  0  0  0  0  0
    0.0718    5.1858    0.0000 C   0  0  0  0  0  0  0  0  0  0  0  0
    1.1165    3.3859    0.0000 C   0  0  0  0  0  0  0  0  0  0  0  0
    1.9415    3.3776    0.0000 C   0  0  0  0  0  0  0  0  0  0  0  0
    2.3494    4.0812    0.0000 C   0  0  0  0  0  0  0  0  0  0  0  0
    1.9560    4.8065    0.0000 C   0  0  0  0  0  0  0  0  0  0  0  0
    2.3351    2.6727    0.0000 C   0  0  0  0  0  0  0  0  0  0  0  0
    3.1626    4.0729    0.0000 C   0  0  0  0  0  0  0  0  0  0  0  0
    3.5562    3.3612    0.0000 C   0  0  0  0  0  0  0  0  0  0  0  0
    3.1483    2.6644    0.0000 C   0  0  0  0  0  0  0  0  0  0  0  0
    3.1558    1.9587    0.0000 C   0  0  0  0  0  0  0  0  0  0  0  0
    4.3707    2.6773    0.0000 C   0  0  0  0  0  0  0  0  0  0  0  0
   -1.9415    4.7805    0.0000 C   0  0  0  0  0  0  0  0  0  0  0  0
   -2.3228    4.0357    0.0000 C   0  0  0  0  0  0  0  0  0  0  0  0
   -1.8571    3.3404    0.0000 C   0  0  0  0  0  0  0  0  0  0  0  0
   -1.0335    3.3887    0.0000 C   0  0  0  0  0  0  0  0  0  0  0  0
   -3.1581    3.9867    0.0000 C   0  0  0  0  0  0  0  0  0  0  0  0
   -3.0738    2.5467    0.0000 C   0  0  0  0  0  0  0  0  0  0  0  0
   -2.2384    2.5956    0.0000 C   0  0  0  0  0  0  0  0  0  0  0  0
   -4.3257    2.5045    0.0000 C   0  0  0  0  0  0  0  0  0  0  0  0
   -3.0504    1.8305    0.0000 C   0  0  0  0  0  0  0  0  0  0  0  0
   -3.5277    3.2425    0.0000 C   0  0  0  0  0  0  0  0  0  0  0  0
    1.2617   -4.5182    0.0000 C   0  0  0  0  0  0  0  0  0  0  0  0
    0.1812   -3.4914    0.0000 C   0  0  0  0  0  0  0  0  0  0  0  0
    0.2566   -5.1574    0.0000 C   0  0  0  0  0  0  0  0  0  0  0  0
    1.2167   -3.0764    0.0000 C   0  0  0  0  0  0  0  0  0  0  0  0
    0.8212   -3.8137    0.0000 C   0  0  0  0  0  0  0  0  0  0  0  0
    2.0923   -4.4957    0.0000 C   0  0  0  0  0  0  0  0  0  0  0  0
    2.4429   -2.3165    0.0000 C   0  0  0  0  0  0  0  0  0  0  0  0
    2.0529   -3.0435    0.0000 C   0  0  0  0  0  0  0  0  0  0  0  0
    2.4879   -3.7583    0.0000 C   0  0  0  0  0  0  0  0  0  0  0  0
    3.3240   -3.7254    0.0000 C   0  0  0  0  0  0  0  0  0  0  0  0
    3.7706    1.6123    0.0000 C   0  0  0  0  0  0  0  0  0  0  0  0
    4.5777    1.6341    0.0000 C   0  0  0  0  0  0  0  0  0  0  0  0
    5.0119    0.9464    0.0000 C   0  0  0  0  0  0  0  0  0  0  0  0
    3.3862    0.8957    0.0000 C   0  0  0  0  0  0  0  0  0  0  0  0
    5.0735   -0.4643    0.0000 C   0  0  0  0  0  0  0  0  0  0  0  0
    4.6274    0.2298    0.0000 C   0  0  0  0  0  0  0  0  0  0  0  0
    3.8144    0.2112    0.0000 C   0  0  0  0  0  0  0  0  0  0  0  0
    3.4243   -0.5158    0.0000 C   0  0  0  0  0  0  0  0  0  0  0  0
    4.5166   -2.2654    0.0000 C   0  0  0  0  0  0  0  0  0  0  0  0
    4.6835   -1.1913    0.0000 C   0  0  0  0  0  0  0  0  0  0  0  0
    3.8585   -1.2035    0.0000 C   0  0  0  0  0  0  0  0  0  0  0  0
    3.2454   -1.5834    0.0000 C   0  0  0  0  0  0  0  0  0  0  0  0
    3.2679   -2.3043    0.0000 C   0  0  0  0  0  0  0  0  0  0  0  0
    3.7140   -2.9984    0.0000 C   0  0  0  0  0  0  0  0  0  0  0  0
   -3.3775   -3.2571    0.0000 C   0  0  0  0  0  0  0  0  0  0  0  0
   -2.9561   -2.5268    0.0000 C   0  0  0  0  0  0  0  0  0  0  0  0
   -2.9685   -1.7897    0.0000 C   0  0  0  0  0  0  0  0  0  0  0  0
   -3.6129   -1.4319    0.0000 C   0  0  0  0  0  0  0  0  0  0  0  0
   -4.4557   -1.4599    0.0000 C   0  0  0  0  0  0  0  0  0  0  0  0
   -4.2326   -2.5481    0.0000 C   0  0  0  0  0  0  0  0  0  0  0  0
   -3.2034   -0.7087    0.0000 C   0  0  0  0  0  0  0  0  0  0  0  0
   -3.6371    0.0143    0.0000 C   0  0  0  0  0  0  0  0  0  0  0  0
   -4.4680   -0.0065    0.0000 C   0  0  0  0  0  0  0  0  0  0  0  0
   -4.8894   -0.7369    0.0000 C   0  0  0  0  0  0  0  0  0  0  0  0
   -3.2335    0.7340    0.0000 C   0  0  0  0  0  0  0  0  0  0  0  0
   -4.8955    0.7062    0.0000 C   0  0  0  0  0  0  0  0  0  0  0  0
   -4.4860    1.4295    0.0000 C   0  0  0  0  0  0  0  0  0  0  0  0
   -3.6611    1.4467    0.0000 C   0  0  0  0  0  0  0  0  0  0  0  0
   -2.9438   -3.9802    0.0000 C   0  0  0  0  0  0  0  0  0  0  0  0
   -2.0887   -3.9728    0.0000 C   0  0  0  0  0  0  0  0  0  0  0  0
   -1.6796   -3.2218    0.0000 C   0  0  0  0  0  0  0  0  0  0  0  0
   -2.1133   -2.4988    0.0000 C   0  0  0  0  0  0  0  0  0  0  0  0
   -1.6488   -4.7061    0.0000 C   0  0  0  0  0  0  0  0  0  0  0  0
   -0.3846   -3.9477    0.0000 C   0  0  0  0  0  0  0  0  0  0  0  0
   -0.8245   -3.2144    0.0000 C   0  0  0  0  0  0  0  0  0  0  0  0
   -0.7998   -4.6884    0.0000 C   0  0  0  0  0  0  0  0  0  0  0  0
    2.3280    5.4244    0.0000 C   0  0  0  0  0  0  0  0  0  0  0  0
    3.5321    4.6923    0.0000 C   0  0  0  0  0  0  0  0  0  0  0  0
    3.1805    5.3221    0.0000 C   0  0  0  0  0  0  0  0  0  0  0  0
    3.5820    5.9212    0.0000 C   0  0  0  0  0  0  0  0  0  0  0  0
    3.2639    6.5685    0.0000 C   0  0  0  0  0  0  0  0  0  0  0  0
    4.3017    5.8730    0.0000 C   0  0  0  0  0  0  0  0  0  0  0  0
    3.9836    6.5203    0.0000 C   0  0  0  0  0  0  0  0  0  0  0  0
    0.7470    2.7665    0.0000 C   0  0  0  0  0  0  0  0  0  0  0  0
    1.9669    2.0525    0.0000 C   0  0  0  0  0  0  0  0  0  0  0  0
    1.0987    2.1368    0.0000 C   0  0  0  0  0  0  0  0  0  0  0  0
    0.7039    1.5332    0.0000 C   0  0  0  0  0  0  0  0  0  0  0  0
    1.0293    0.8895    0.0000 C   0  0  0  0  0  0  0  0  0  0  0  0
   -0.0162    1.5732    0.0000 C   0  0  0  0  0  0  0  0  0  0  0  0
    0.3433    0.9085    0.0000 C   0  0  0  0  0  0  0  0  0  0  0  0
    5.7327    0.9719    0.0000 C   0  0  0  0  0  0  0  0  0  0  0  0
    5.7942   -0.4359    0.0000 C   0  0  0  0  0  0  0  0  0  0  0  0
    6.1300    0.2024    0.0000 C   0  0  0  0  0  0  0  0  0  0  0  0
    6.8512    0.1997    0.0000 C   0  0  0  0  0  0  0  0  0  0  0  0
    7.2142    0.8230    0.0000 C   0  0  0  0  0  0  0  0  0  0  0  0
    7.2095   -0.4263    0.0000 C   0  0  0  0  0  0  0  0  0  0  0  0
    7.5725    0.1970    0.0000 C   0  0  0  0  0  0  0  0  0  0  0  0
    2.6653    0.8717    0.0000 C   0  0  0  0  0  0  0  0  0  0  0  0
    2.7035   -0.5413    0.0000 C   0  0  0  0  0  0  0  0  0  0  0  0
    2.3210    0.0702    0.0000 C   0  0  0  0  0  0  0  0  0  0  0  0
    1.6002    0.0447    0.0000 C   0  0  0  0  0  0  0  0  0  0  0  0
    1.2177    0.6562    0.0000 C   0  0  0  0  0  0  0  0  0  0  0  0
    1.2619   -0.5923    0.0000 C   0  0  0  0  0  0  0  0  0  0  0  0
    0.8790    0.0447    0.0000 C   0  0  0  0  0  0  0  0  0  0  0  0
   -2.3959    5.4832    0.0000 C   0  0  0  0  0  0  0  0  0  0  0  0
   -3.2316    5.4410    0.0000 C   0  0  0  0  0  0  0  0  0  0  0  0
   -3.6129    4.6961    0.0000 C   0  0  0  0  0  0  0  0  0  0  0  0
   -1.7735    1.9140    0.0000 C   0  0  0  0  0  0  0  0  0  0  0  0
   -0.9499    1.9622    0.0000 C   0  0  0  0  0  0  0  0  0  0  0  0
   -0.5799    2.6996    0.0000 C   0  0  0  0  0  0  0  0  0  0  0  0
   -2.4085   -0.6950    0.0000 C   0  0  0  0  0  0  0  0  0  0  0  0
   -2.0049    0.0143    0.0000 C   0  0  0  0  0  0  0  0  0  0  0  0
   -2.4085    0.7340    0.0000 C   0  0  0  0  0  0  0  0  0  0  0  0
   -5.7265    0.7062    0.0000 C   0  0  0  0  0  0  0  0  0  0  0  0
   -6.1300   -0.0065    0.0000 C   0  0  0  0  0  0  0  0  0  0  0  0
   -5.7265   -0.7192    0.0000 C   0  0  0  0  0  0  0  0  0  0  0  0
   -0.4033   -2.4701    0.0000 C   0  0  0  0  0  0  0  0  0  0  0  0
   -0.8245   -1.7333    0.0000 C   0  0  0  0  0  0  0  0  0  0  0  0
   -1.6796   -1.7333    0.0000 C   0  0  0  0  0  0  0  0  0  0  0  0
   -3.3588   -4.7061    0.0000 C   0  0  0  0  0  0  0  0  0  0  0  0
   -2.9437   -5.4394    0.0000 C   0  0  0  0  0  0  0  0  0  0  0  0
   -2.0887   -5.4394    0.0000 C   0  0  0  0  0  0  0  0  0  0  0  0
    2.5448   -5.2065    0.0000 C   0  0  0  0  0  0  0  0  0  0  0  0
    3.3810   -5.2065    0.0000 C   0  0  0  0  0  0  0  0  0  0  0  0
    3.7706   -4.4989    0.0000 C   0  0  0  0  0  0  0  0  0  0  0  0
    2.0083   -1.6152    0.0000 C   0  0  0  0  0  0  0  0  0  0  0  0
    1.1837   -1.6152    0.0000 C   0  0  0  0  0  0  0  0  0  0  0  0
    0.7937   -2.3165    0.0000 C   0  0  0  0  0  0  0  0  0  0  0  0
   -3.6233    6.0466    0.0000 C   0  0  0  0  0  0  0  0  0  0  0  0
   -3.2946    6.6887    0.0000 C   0  0  0  0  0  0  0  0  0  0  0  0
   -4.3436    6.0103    0.0000 C   0  0  0  0  0  0  0  0  0  0  0  0
   -3.9839    6.6713    0.0000 C   0  0  0  0  0  0  0  0  0  0  0  0
   -0.5534    1.3598    0.0000 C   0  0  0  0  0  0  0  0  0  0  0  0
   -0.8768    0.7151    0.0000 C   0  0  0  0  0  0  0  0  0  0  0  0
   -1.2837    0.0121    0.0000 C   0  0  0  0  0  0  0  0  0  0  0  0
   -0.4625   -1.1094    0.0000 C   0  0  0  0  0  0  0  0  0  0  0  0
   -0.8218   -0.4840    0.0000 C   0  0  0  0  0  0  0  0  0  0  0  0
    0.2588   -1.1110    0.0000 C   0  0  0  0  0  0  0  0  0  0  0  0
   -0.1005   -0.4856    0.0000 C   0  0  0  0  0  0  0  0  0  0  0  0
    0.8181   -0.9935    0.0000 C   0  0  0  0  0  0  0  0  0  0  0  0
   -6.8512   -0.0065    0.0000 C   0  0  0  0  0  0  0  0  0  0  0  0
   -7.2119   -0.6311    0.0000 C   0  0  0  0  0  0  0  0  0  0  0  0
   -7.2119    0.6181    0.0000 C   0  0  0  0  0  0  0  0  0  0  0  0
   -7.5725   -0.0065    0.0000 C   0  0  0  0  0  0  0  0  0  0  0  0
   -3.3070   -6.0625    0.0000 C   0  0  0  0  0  0  0  0  0  0  0  0
   -2.9490   -6.6887    0.0000 C   0  0  0  0  0  0  0  0  0  0  0  0
   -4.0282   -6.0594    0.0000 C   0  0  0  0  0  0  0  0  0  0  0  0
   -3.6702   -6.6856    0.0000 C   0  0  0  0  0  0  0  0  0  0  0  0
    3.7479   -5.8275    0.0000 C   0  0  0  0  0  0  0  0  0  0  0  0
    3.3937   -6.4557    0.0000 C   0  0  0  0  0  0  0  0  0  0  0  0
    4.4691   -5.8201    0.0000 C   0  0  0  0  0  0  0  0  0  0  0  0
    4.1149   -6.4484    0.0000 C   0  0  0  0  0  0  0  0  0  0  0  0
    0.1433    1.1731    0.0000 C   0  0  0  0  0  0  0  0  0  0  0  0
   -0.1312    1.9446    0.0000 C   0  0  0  0  0  0  0  0  0  0  0  0
   -1.2837    0.7334    0.0000 C   0  0  0  0  0  0  0  0  0  0  0  0
   -0.6590    0.3727    0.0000 C   0  0  0  0  0  0  0  0  0  0  0  0
   -1.0970   -0.6846    0.0000 C   0  0  0  0  0  0  0  0  0  0  0  0
    1.5148   -0.8068    0.0000 C   0  0  0  0  0  0  0  0  0  0  0  0
    0.6314   -0.2968    0.0000 C   0  0  0  0  0  0  0  0  0  0  0  0
    0.4575   -1.6181    0.0000 C   0  0  0  0  0  0  0  0  0  0  0  0
  1  2  1  0      
  2  3  2  0      
  3  4  1  0      
  4  5  2  0      
  5  6  1  0      
  6  1  2  0      
  4  7  1  0      
  7  8  2  0      
  8  9  1  0      
  9 10  2  0      
 10  5  1  0      
  8 11  1  0      
 11 14  1  0      
 13 12  1  0      
 12  9  1  0      
 13 14  1  0      
 14 15  2  0      
 15 37  1  0      
 38 16  1  0      
 16 13  2  0      
  1 17  1  0      
 17 18  2  0      
 18 19  1  0      
 19 20  2  0      
 20  2  1  0      
 18 21  1  0      
 21 26  1  0      
 26 22  2  0      
 22 23  1  0      
 23 19  1  0      
 24 26  1  0      
 63 24  2  0      
 25 64  2  0      
 22 25  1  0      
 31 28  2  0      
 29 27  2  0      
 30 34  1  0      
 31 30  1  0      
 27 31  1  0      
 32 27  1  0      
 35 32  1  0      
 33 49  1  0      
 34 33  2  0      
 35 34  1  0      
 36 35  2  0      
 50 36  1  0      
 38 37  2  0      
 39 42  2  0      
 38 39  1  0      
 40 37  1  0      
 43 40  2  0      
 41 46  1  0      
 42 41  1  0      
 43 42  1  0      
 44 43  1  0      
 47 44  1  0      
 45 50  1  0      
 46 45  2  0      
 47 46  1  0      
 48 47  2  0      
 49 48  1  0      
 50 49  2  0      
 51 52  1  0      
 52 53  2  0      
 53 54  1  0      
 54 55  2  0      
 55 56  1  0      
 56 51  2  0      
 54 57  1  0      
 57 58  1  0      
 58 59  1  0      
 59 60  1  0      
 60 55  1  0      
 58 61  2  0      
 61 64  1  0      
 63 62  1  0      
 62 59  2  0      
 63 64  1  0      
 51 65  1  0      
 65 66  1  0      
 66 67  1  0      
 67 68  1  0      
 68 52  1  0      
 66 69  2  0      
 69 72  1  0      
 72 70  2  0      
 70 71  1  0      
 71 67  2  0      
 28 70  1  0      
 29 72  1  0      
 10 73  1  0      
 12 74  2  0      
 74 75  1  0      
 73 75  2  0      
 75 76  1  0      
 76 77  1  0      
 76 78  1  0      
 76 79  1  0      
  7 80  1  0      
 11 81  2  0      
 80 82  2  0      
 81 82  1  0      
 82 83  1  0      
 83 84  1  0      
 83 85  1  0      
 83 86  1  0      
 39 87  1  0      
 41 88  2  0      
 88 89  1  0      
 87 89  2  0      
 89 90  1  0      
 90 91  1  0      
 90 92  1  0      
 90 93  1  0      
 40 94  1  0      
 44 95  2  0      
 95 96  1  0      
 96 97  1  0      
 96 94  2  0      
 97 98  1  0      
 97 99  1  0      
 97100  1  0      
 17101  1  0      
101102  2  0      
102103  1  0      
103 21  2  0      
 23104  2  0      
104105  1  0      
105106  2  0      
106 20  1  0      
 57107  2  0      
107108  1  0      
108109  2  0      
109 61  1  0      
 62110  1  0      
110111  2  0      
111112  1  0      
112 60  2  0      
 71113  1  0      
113114  2  0      
114115  1  0      
115 68  2  0      
 65116  2  0      
116117  1  0      
117118  2  0      
118 69  1  0      
 32119  2  0      
119120  1  0      
120121  2  0      
121 36  1  0      
 33122  1  0      
122123  2  0      
123124  1  0      
124 30  2  0      
102125  1  0      
125126  1  0      
125127  1  0      
125128  1  0      
105129  1  0      
129130  1  0      
108131  1  0      
114132  1  0      
132133  1  0      
132134  1  0      
132135  1  0      
123136  1  0      
111137  1  0      
137138  1  0      
137139  1  0      
137140  1  0      
117141  1  0      
141142  1  0      
141143  1  0      
141144  1  0      
120145  1  0      
145146  1  0      
145147  1  0      
145148  1  0      
129149  1  0      
129150  1  0      
131151  1  0      
131152  1  0      
131153  1  0      
136154  1  0      
136155  1  0      
136156  1  0      
M  END
